# Supplementary material for: Horizontal transfer of BovB and L1 retrotransposons in eukaryotes
Source: PubMed Central journal article supplement (PMC6036668; doi:10.1186/s13059-018-1456-7), 2018-07-09
Supplement: 13059_2018_1456_MOESM1_ESM.pdf [file 13059_2018_1456_MOESM1_ESM.pdf]

## Supplementary Tables

|                                                   |     |
|---------------------------------------------------|-----|
| Table S1: Our dataset of public domain genomes    | 2   |
| Table S2: L1s in genomic data                     | 40  |
| Table S3: BovBs in genomic data                   | 60  |
| Table S4: Genome coverage of L1 and BovB elements | 80  |
| Table S5: BovB HT candidate clusters              | 95  |
| Table S6: L1 HT candidate clusters                | 102 |

# Table S1: Our dataset of public domain genomes

Table S1: Shows the systematic name, common name, genome version, source and submitter for the 759 genomes used in this study. Almost all are in the public domain; only four genomes were acquired through collaborators, these are marked ‘Private’ in the source column. Headings indicate Kingdom (METAZOA, FUNGI or VIRIDIPLANTAE), followed by Class (e.g. MAMMALIA) and Order (e.g. Monotremata).

| No                 | Systematic Name                       | Common Name               | Genome Version | Source  | Submitter                                   |
|--------------------|---------------------------------------|---------------------------|----------------|---------|---------------------------------------------|
| <b>METAZOA</b>     |                                       |                           |                |         |                                             |
| <b>MAMMALIA</b>    |                                       |                           |                |         |                                             |
| <b>Monotremata</b> |                                       |                           |                |         |                                             |
| 1                  | <i>Tachyglossus aculeatus</i>         | Echidna                   | Tachyglossus   | Private | -                                           |
| 2                  | <i>Ornithorhynchus anatinus</i>       | Platypus                  | ornAna1        | UCSC    | WashU                                       |
| <b>Marsupialia</b> |                                       |                           |                |         |                                             |
| 3                  | <i>Monodelphis domestica</i>          | Opossum                   | monDom5        | UCSC    | GAT                                         |
| 4                  | <i>Macropus eugenii</i>               | Tammar wallaby            | Meug_1.1       | NCBI    | Tammar Wallaby Genome Sequencing Consortium |
| 5                  | <i>Sarcophilus harrisi</i>            | Tasmanian devil           | sarHar1        | UCSC    | WTSI                                        |
| <b>Xenarthra</b>   |                                       |                           |                |         |                                             |
| 6                  | <i>Dasypus novemcinctus</i>           | Armadillo                 | Dasnov3.0      | NCBI    | BCM                                         |
| 7                  | <i>Choloepus hoffmanni</i>            | Sloth                     | choHof1        | UCSC    | Broad                                       |
| <b>Afrotheria</b>  |                                       |                           |                |         |                                             |
| 8                  | <i>Chrysochloris asiatica</i>         | Cape golden mole          | ChrAsi1.0      | NCBI    | Broad                                       |
| 9                  | <i>Echinops telfairi</i>              | Tenrec                    | EchTel2.0      | NCBI    | Broad                                       |
| 10                 | <i>Orycteropus afer afer</i>          | Aardvark                  | OryAfe1.0      | NCBI    | Broad                                       |
| 11                 | <i>Elephantulus edwardii</i>          | Cape elephant shrew       | EleEdw1.0      | NCBI    | Broad                                       |
| 12                 | <i>Trichechus manatus latirostris</i> | Manatee                   | TriManLat1.0   | NCBI    | Broad                                       |
| 13                 | <i>Procavia capensis</i>              | Rock hyrax                | proCap1        | UCSC    | BCM                                         |
| 14                 | <i>Loxodonta africana</i>             | Elephant                  | LAv4           | Private | -                                           |
| <b>Insectivora</b> |                                       |                           |                |         |                                             |
| 15                 | <i>Erinaceus europaeus</i>            | Hedgehog                  | EriEur2.0      | NCBI    | Broad                                       |
| 16                 | <i>Sorex araneus</i>                  | Common shrew              | SorAra2.0      | NCBI    | Broad                                       |
| 17                 | <i>Condylura cristata</i>             | Star-nosed mole           | ConCri1.0      | NCBI    | Broad                                       |
| <b>Chiroptera</b>  |                                       |                           |                |         |                                             |
| 18                 | <i>Pteropus alecto</i>                | Black flying fox          | ASM32557v1     | NCBI    | BGI                                         |
| 19                 | <i>Pteropus vampyrus</i>              | Megabat                   | pteVam1        | UCSC    | BCM                                         |
| 20                 | <i>Eidolon helvum</i>                 | Straw-coloured fruit bat  | ASM46528v1     | NCBI    | QMUL                                        |
| 21                 | <i>Megaderma lyra</i>                 | Greater false vampire bat | ASM46534v1     | NCBI    | QMUL                                        |
| 22                 | <i>Rhinolophus ferrumequinum</i>      | Greater horseshoe bat     | ASM46549v1     | NCBI    | QMUL                                        |

| No                     | Systematic Name                      | Common Name            | Genome Version                  | Source | Submitter                                                 |
|------------------------|--------------------------------------|------------------------|---------------------------------|--------|-----------------------------------------------------------|
| 23                     | <i>Pteronotus parnellii</i>          | Parnells mustached bat | ASM46540v1                      | NCBI   | QMUL                                                      |
| 24                     | <i>Eptesicus fuscus</i>              | Big brown bat          | EptFus1.0                       | NCBI   | Broad                                                     |
| 25                     | <i>Myotis brandtii</i>               | Brandts bat            | ASM41265v1                      | NCBI   | BGI                                                       |
| 26                     | <i>Myotis davidii</i>                | Mouse-eared bat        | ASM32734v1                      | NCBI   | BGI                                                       |
| 27                     | <i>Myotis lucifugus</i>              | Microbat               | Myoluc2.0                       | NCBI   | Broad                                                     |
| <b>Perissodactyla</b>  |                                      |                        |                                 |        |                                                           |
| 28                     | <i>Ceratotherium simum simum</i>     | White rhino            | CerSimSim1.0                    | NCBI   | Broad                                                     |
| 29                     | <i>Equus przewalskii</i>             | Przewalski horse       | Burgud                          | NCBI   | IMAU                                                      |
| 30                     | <i>Equus caballus</i> (Thoroughbred) | Thoroughbred horse     | equCab2                         | UCSC   | GAT                                                       |
| 31                     | <i>Equus caballus</i> (Mongolian)    | Mongolian horse        | Ajinai1.0                       | NCBI   | IMAU                                                      |
| <b>Pholidota</b>       |                                      |                        |                                 |        |                                                           |
| 32                     | <i>Manis pentadactyla</i>            | Chinese pangolin       | M_pentadactyla-1.1.1            | NCBI   | WashU                                                     |
| <b>Carnivora</b>       |                                      |                        |                                 |        |                                                           |
| 33                     | <i>Felis catus</i>                   | Cat                    | felCat5                         | UCSC   | International Cat Genome Sequencing Consortium            |
| 34                     | <i>Panthera tigris altaica</i>       | Siberian tiger         | PanTig1.0                       | NCBI   | Personal Genomics Institute                               |
| 35                     | <i>Canis lupus familiaris</i>        | Dog                    | CanFam3.1                       | NCBI   | Dog Genome Sequencing Consortium                          |
| 36                     | <i>Ursus maritimus</i>               | Polar bear             | UrsMar_1.0                      | NCBI   | BGI                                                       |
| 37                     | <i>Ailuropoda melanoleuca</i>        | Panda                  | ailMel1                         | UCSC   | BGI                                                       |
| 38                     | <i>Leptonychotes weddellii</i>       | Weddell seal           | LepWed1.0                       | NCBI   | Broad                                                     |
| 39                     | <i>Odobenus rosmarus divergens</i>   | Walrus                 | Oros_1.0                        | NCBI   | Marine Mammals                                            |
| 40                     | <i>Mustela putorius furo</i>         | Ferret                 | MusPutFur1.0                    | NCBI   | Ferret Genome Sequencing Consortium                       |
| <b>Cetartiodactyla</b> |                                      |                        |                                 |        |                                                           |
| 41                     | <i>Camelus dromedarius</i>           | Dromedary              | PRJNA234474_Ca_dromedarius.V1.0 | NCBI   | King Abdulaziz City for Science and Technology            |
| 42                     | <i>Camelus ferus</i>                 | Bactrian camel         | CB1                             | NCBI   | Bactrian Camels Genome Sequencing and Analysis Consortium |
| 43                     | <i>Vicugna pacos</i>                 | Alpaca                 | Vicugna_pacos-2.0.1             | NCBI   | WashU                                                     |

| No                | Systematic Name                                 | Common Name             | Genome Version               | Source | Submitter                                       |
|-------------------|-------------------------------------------------|-------------------------|------------------------------|--------|-------------------------------------------------|
| 44                | <i>Sus scrofa</i> (Duroc)                       | Duroc pig               | Sscrofa10.2                  | NCBI   | Swine Genome Sequencing Consortium              |
| 45                | <i>Sus scrofa</i> (Tibetan)                     | Tibetan pig             | Tibetan_Pig_v1.0             | NCBI   | Novogene                                        |
| 46                | <i>Sus scrofa</i> (Ellegaard Gottingen minipig) | Minipig                 | SscrofaMinipig               | NCBI   | GlaxoSmithKline                                 |
| 47                | <i>Balaenoptera acutorostrata scammoni</i>      | Minke whale             | BalAcu1.0                    | NCBI   | Korea Ocean Research & Development Institute    |
| 48                | <i>Physeter catodon</i>                         | Sperm whale             | Physeter_macrocephalus-2.0.2 | NCBI   | AGM                                             |
| 49                | <i>Lipotes vexillifer</i>                       | Baiji (Chinese dolphin) | Lipotes_vexillifer_v1        | NCBI   | BGI                                             |
| 50                | <i>Tursiops truncatus</i>                       | Bottlenose dolphin      | Ttru_1.4                     | NCBI   | BCM                                             |
| 51                | <i>Orcinus orca</i>                             | Killer whale            | Oorc_1.1                     | NCBI   | Marine Mammals                                  |
| 52                | <i>Pantholops hodgsonii</i>                     | Tibetan antelope        | PHO1.0                       | NCBI   | BGI                                             |
| 53                | <i>Capra hircus</i>                             | Goat                    | CHIR_1.0                     | NCBI   | International Goat Genome Consortium            |
| 54                | <i>Ovis aries</i> (Texel)                       | Domestic sheep          | oviAri3                      | UCSC   | International Sheep Genome Consortium           |
| 55                | <i>Ovis aries musimon</i>                       | Wild sheep              | Oori1                        | NCBI   | EBI                                             |
| 56                | <i>Bubalus bubalis</i>                          | Water buffalo           | UMD_CASPUR_WB_2.0            | NCBI   | Mary                                            |
| 57                | <i>Bison bison bison</i>                        | Bison                   | Bison_UMD1.0                 | NCBI   | Mary                                            |
| 58                | <i>Bos mutus</i>                                | Yak                     | BosGru_v2.0                  | NCBI   | BGI                                             |
| 59                | <i>Bos indicus</i>                              | Zebu                    | Bos_indicus_1.0              | NCBI   | Genoa Biotecnologia SA                          |
| 60                | <i>Bos taurus</i>                               | Cow                     | bosTau6                      | UCSC   | Mary                                            |
| <b>Lagomorpha</b> |                                                 |                         |                              |        |                                                 |
| 61                | <i>Ochotona princeps</i>                        | American pika           | OchPri3.0                    | NCBI   | Broad                                           |
| 62                | <i>Oryctolagus cuniculus</i>                    | Rabbit                  | oryCun2                      | UCSC   | GSP                                             |
| <b>Rodentia</b>   |                                                 |                         |                              |        |                                                 |
| 63                | <i>Ictidomys tridecemlineatus</i>               | Squirrel                | SpeTri2.0                    | NCBI   | Broad                                           |
| 64                | <i>Heterocephalus glaber</i>                    | Naked mole rat          | HetGla_female_1.0            | NCBI   | Broad                                           |
| 65                | <i>Fukomys damarensis</i>                       | Damaraland mole rat     | DMR_v1.0                     | NCBI   | BGI                                             |
| 66                | <i>Cavia aperea</i>                             | Brazilian guinea pig    | CavAp1.0                     | NCBI   | Leibniz Institute for Zoo and Wildlife research |
| 67                | <i>Cavia porcellus</i>                          | Guinea pig              | cavPor3                      | UCSC   | GSP                                             |
| 68                | <i>Chinchilla lanigera</i>                      | Chinchilla              | ChiLan1.0                    | NCBI   | Broad                                           |

| No                | Systematic Name                        | Common Name            | Genome Version          | Source | Submitter                                     |
|-------------------|----------------------------------------|------------------------|-------------------------|--------|-----------------------------------------------|
| 69                | <i>Octodon degus</i>                   | Degu                   | OctDeg1.0               | NCBI   | Broad                                         |
| 70                | <i>Dipodomys ordii</i>                 | Kangaroo rat           | dipOrd1                 | UCSC   | BCM                                           |
| 71                | <i>Jaculus jaculus</i>                 | Lesser Egyptian jerboa | JacJac1.0               | NCBI   | Broad                                         |
| 72                | <i>Nannospalax galili</i>              | Blind mole rat         | S.galili.v1.0           | NCBI   | BGI                                           |
| 73                | <i>Mesocricetus auratus</i>            | Golden hamster         | MesAur1.0               | NCBI   | Broad                                         |
| 74                | <i>Cricetulus griseus</i>              | Chinese hamster        | CriGri.1.0              | NCBI   | BGI                                           |
| 75                | <i>Microtus ochrogaster</i>            | Prairie vole           | MicOch1.0               | NCBI   | Broad                                         |
| 76                | <i>Peromyscus maniculatus bairdii</i>  | Deer mouse             | Pman.1.0                | NCBI   | BCM                                           |
| 77                | <i>Rattus norvegicus</i>               | Rat                    | Rnor.5.0                | NCBI   | Rat Genome Sequencing Consortium              |
| 78                | <i>Mus musculus</i>                    | Mouse                  | GRCm38.p2               | NCBI   | GRC                                           |
| <b>Scandentia</b> |                                        |                        |                         |        |                                               |
| 79                | <i>Tupaia belangeri</i>                | Tree shrew             | tupBel1                 | UCSC   | Broad                                         |
| 80                | <i>Tupaia chinensis</i>                | Chinese tree shrew     | TupChi.1.0              | NCBI   | BGI                                           |
| <b>Primates</b>   |                                        |                        |                         |        |                                               |
| 81                | <i>Galeopterus variegatus</i>          | Flying lemur           | G_variegatus-3.0.2      | NCBI   | WashU                                         |
| 82                | <i>Otolemur garnettii</i>              | Bushbaby               | OtoGar3                 | NCBI   | Broad                                         |
| 83                | <i>Microcebus murinus</i>              | Mouse lemur            | micMur1                 | UCSC   | GSP                                           |
| 84                | <i>Tarsius syrichta</i>                | Tarsier                | Tarsius_syrichta-2.0.1  | NCBI   | WashU                                         |
| 85                | <i>Callithrix jacchus</i>              | Marmoset               | Callithrix_jacchus-3.2  | NCBI   | WashU                                         |
| 86                | <i>Saimiri boliviensis boliviensis</i> | Squirrel monkey        | SaiBol1.0               | NCBI   | Broad                                         |
| 87                | <i>Rhinopithecus roxellana</i>         | Snub-nosed monkey      | Rrox.v1                 | NCBI   | Novogene                                      |
| 88                | <i>Nasalis larvatus</i>                | Proboscis monkey       | Charlie1.0              | NCBI   | Proboscis Monkey Functional Genome Consortium |
| 89                | <i>Chlorocebus sabaeus</i>             | Green monkey           | Chlorocebus_sabeus 1.1  | NCBI   | Vervet Genomics Consortium                    |
| 90                | <i>Macaca fascicularis</i>             | Crab-eating macaque    | Macaca_fascicularis_5.0 | NCBI   | WashU                                         |
| 91                | <i>Macaca mulatta</i>                  | Rhesus macaque         | rheMac3                 | UCSC   | BGI                                           |
| 92                | <i>Papio anubis</i>                    | Baboon                 | Panu.2.0                | NCBI   | BCM                                           |
| 93                | <i>Nomascus leucogenys</i>             | Gibbon                 | nomLeu3                 | UCSC   | Gibbon Genome Sequencing Consortium           |
| 94                | <i>Pongo abelii</i>                    | Sumatran orangutan     | P_pygmaeus_2.0.2        | NCBI   | Orangutan Genome Sequencing Consortium        |
| 95                | <i>Gorilla gorilla gorilla</i>         | Gorilla                | gorGor3.1               | NCBI   | WTSI                                          |

| No                      | Systematic Name                   | Common Name              | Genome Version | Source | Submitter                                                                          |
|-------------------------|-----------------------------------|--------------------------|----------------|--------|------------------------------------------------------------------------------------|
| 96                      | <i>Pan paniscus</i>               | Bonobo                   | panpan1        | NCBI   | MP                                                                                 |
| 97                      | <i>Pan troglodytes</i>            | Chimp                    | panTro4        | UCSC   | Chimpanzee Sequencing and Analysis Consortium                                      |
| 98                      | <i>Homo sapiens</i>               | Human                    | GRCh37 (hg19)  | NCBI   | GRC                                                                                |
| <b>SAUROPSIDA</b>       |                                   |                          |                |        |                                                                                    |
| <b>Testudines</b>       |                                   |                          |                |        |                                                                                    |
| 99                      | <i>Apalone spinifera</i>          | Spiny softshell turtle   | ASM38561v1     | NCBI   | WUGSC                                                                              |
| 100                     | <i>Pelodiscus sinensis</i>        | Chinese softshell turtle | PelSin_1.0     | NCBI   | P. sinensis Genome Project Consortium                                              |
| 101                     | <i>Chelonia mydas</i>             | Green sea turtle         | CheMyd_1.0     | NCBI   | BGI                                                                                |
| 102                     | <i>Chrysemys picta bellii</i>     | Painted turtle           | chrPic1        | UCSC   | Painted Turtle Genome Sequencing Consortium                                        |
| <b>Struthioniformes</b> |                                   |                          |                |        |                                                                                    |
| 103                     | <i>Struthio camelus australis</i> | Ostrich                  | ASM69896v1     | NCBI   | BGI                                                                                |
| <b>Tinamiformes</b>     |                                   |                          |                |        |                                                                                    |
| 104                     | <i>Tinamus guttatus</i>           | Tinamou                  | ASM70537v2     | NCBI   | BGI                                                                                |
| <b>Anseriformes</b>     |                                   |                          |                |        |                                                                                    |
| 105                     | <i>Anas platyrhynchos</i>         | Mallard                  | BGI_duck_1.0   | NCBI   | State Key Laboratory for Agrobiotechnology, China Agricultural University, Beijing |
| <b>Galliformes</b>      |                                   |                          |                |        |                                                                                    |
| 106                     | <i>Lyrurus tetrix tetrix</i>      | Black grouse             | tetTet1        | NCBI   | UU                                                                                 |
| 107                     | <i>Gallus gallus</i>              | Chicken                  | galGal4        | UCSC   | International Chicken Genome Consortium                                            |
| 108                     | <i>Coturnix japonica</i>          | Japanese quail           | Coja_1.0       | NCBI   | Tokyo University of Agriculture                                                    |
| 109                     | <i>Meleagris gallopavo</i>        | Turkey                   | melGal1        | UCSC   | Turkey Genome Consortium                                                           |
| 110                     | <i>Colinus virginianus</i>        | Bobwhite                 | NB1.1          | NCBI   | TAMU                                                                               |
| <b>Passeriformes</b>    |                                   |                          |                |        |                                                                                    |
| 111                     | <i>Acanthisitta chloris</i>       | Rifleman                 | ASM69581v1     | NCBI   | BGI                                                                                |
| 112                     | <i>Manacus vitellinus</i>         | Manakin                  | ASM69201v1     | NCBI   | BGI                                                                                |

| No                     | Systematic Name                      | Common Name            | Genome Version               | Source | Submitter                          |
|------------------------|--------------------------------------|------------------------|------------------------------|--------|------------------------------------|
| 113                    | <i>Zonotrichia albicollis</i>        | White-throated sparrow | Zonotrichia_albicollis-1.0.1 | NCBI   | White-throated Sparrow Consortium  |
| 114                    | <i>Geospiza fortis</i>               | Medium ground finch    | geoFor1                      | UCSC   | BGI                                |
| 115                    | <i>Serinus canaria</i>               | Atlantic canary        | SCA1                         | NCBI   | MP                                 |
| 116                    | <i>Taeniopygia guttata</i>           | Zebra finch            | taeGut1                      | UCSC   | WashU                              |
| 117                    | <i>Ficedula albicollis</i>           | Collared flycatcher    | FicAlb1.5                    | NCBI   | UU                                 |
| 118                    | <i>Pseudopodoces humilis</i>         | Ground tit             | PseHum1.0                    | NCBI   | BGI                                |
| 119                    | <i>Corvus brachyrhynchos</i>         | American crow          | ASM69197v1                   | NCBI   | BGI                                |
| 120                    | <i>Corvus cornix cornix</i>          | Hooded crow            | Hooded_Crow_genome           | NCBI   | UU                                 |
| <b>Psittaciformes</b>  |                                      |                        |                              |        |                                    |
| 121                    | <i>Ara macao</i>                     | Scarlet macaw          | SMACv1.1                     | NCBI   | TAMU                               |
| 122                    | <i>Amazona vittata</i>               | Puerto Rican parrot    | AV1                          | NCBI   | Puerto Rican Parrot Genome Project |
| 123                    | <i>Melopsittacus undulatus</i>       | Budgerigar             | melUnd1                      | UCSC   | WashU                              |
| 124                    | <i>Nestor notabilis</i>              | Kea                    | ASM69687v1                   | NCBI   | BGI                                |
| <b>Falconiformes</b>   |                                      |                        |                              |        |                                    |
| 125                    | <i>Falco cherrug</i>                 | Saker falcon           | F_cherrug_v1.0               | NCBI   | BGI                                |
| 126                    | <i>Falco peregrinus</i>              | Peregrine falcon       | F_peregrinus_v1.0            | NCBI   | BGI                                |
| <b>Cariamiformes</b>   |                                      |                        |                              |        |                                    |
| 127                    | <i>Cariama cristata</i>              | Seriema                | ASM69053v1                   | NCBI   | BGI                                |
| <b>Coraciiformes</b>   |                                      |                        |                              |        |                                    |
| 128                    | <i>Merops nubicus</i>                | Bee eater              | ASM69184v1                   | NCBI   | BGI                                |
| <b>Piciformes</b>      |                                      |                        |                              |        |                                    |
| 129                    | <i>Picoides pubescens</i>            | Woodpecker             | ASM69900v1                   | NCBI   | BGI                                |
| <b>Bucerotiformes</b>  |                                      |                        |                              |        |                                    |
| 130                    | <i>Buceros rhinoceros silvestris</i> | Hornbill               | ASM71030v1                   | NCBI   | BGI                                |
| <b>Trogoniformes</b>   |                                      |                        |                              |        |                                    |
| 131                    | <i>Apaloderma vittatum</i>           | Trogon                 | ASM70340v1                   | NCBI   | BGI                                |
| <b>Leptosomiformes</b> |                                      |                        |                              |        |                                    |
| 132                    | <i>Leptosomus discolor</i>           | Cuckoo roller          | ASM69178v1                   | NCBI   | BGI                                |
| <b>Accipitriformes</b> |                                      |                        |                              |        |                                    |
| 133                    | <i>Haliaeetus albicilla</i>          | White-tailed eagle     | ASM69140v1                   | NCBI   | BGI                                |
| 134                    | <i>Haliaeetus leucocephalus</i>      | Bald eagle             | Haliaeetus_leucocephalus-4.0 | NCBI   | The Bald Eagle Consortium          |
| 135                    | <i>Aquila chrysaetos canadensis</i>  | Golden eagle           | Aquila_chrysaetos-1.0.2      | NCBI   | WashU                              |
| 136                    | <i>Cathartes aura</i>                | Turkey vulture         | ASM69994v1                   | NCBI   | BGI                                |
| <b>Strigiformes</b>    |                                      |                        |                              |        |                                    |
| 137                    | <i>Tyto alba</i>                     | Barn owl               | ASM68720v1                   | NCBI   | BGI                                |
| <b>Coliiformes</b>     |                                      |                        |                              |        |                                    |
| 138                    | <i>Colius striatus</i>               | Mousebird              | ASM69071v1                   | NCBI   | BGI                                |
| <b>Charadriiformes</b> |                                      |                        |                              |        |                                    |

| No                         | Systematic Name                        | Common Name        | Genome Version | Source | Submitter                                                    |
|----------------------------|----------------------------------------|--------------------|----------------|--------|--------------------------------------------------------------|
| 139                        | <i>Charadrius vociferus</i>            | Killdeer           | ASM70802v2     | NCBI   | BGI                                                          |
| <b>Gruiformes</b>          |                                        |                    |                |        |                                                              |
| 140                        | <i>Balearica regulorum gibbericeps</i> | Grey crane         | ASM70989v1     | NCBI   | BGI                                                          |
| 141                        | <i>Chlamydotis macqueenii</i>          | MacQueen's bustard | ASM69519v1     | NCBI   | BGI                                                          |
| <b>Cuculiformes</b>        |                                        |                    |                |        |                                                              |
| 142                        | <i>Cuculus canorus</i>                 | Common cuckoo      | ASM70932v1     | NCBI   | BGI                                                          |
| <b>Procellariiformes</b>   |                                        |                    |                |        |                                                              |
| 143                        | <i>Fulmarus glacialis</i>              | Fulmar             | ASM69083v1     | NCBI   | BGI                                                          |
| <b>Sphenisciformes</b>     |                                        |                    |                |        |                                                              |
| 144                        | <i>Aptenodytes forsteri</i>            | Emperor penguin    | ASM69914v1     | NCBI   | BGI                                                          |
| 145                        | <i>Pygoscelis adeliae</i>              | Adelie penguin     | ASM69910v1     | NCBI   | BGI                                                          |
| <b>Pelecaniformes</b>      |                                        |                    |                |        |                                                              |
| 146                        | <i>Phalacrocorax carbo</i>             | Black cormorant    | ASM70892v1     | NCBI   | BGI                                                          |
| 147                        | <i>Pelecanus crispus</i>               | Pelican            | ASM68737v1     | NCBI   | BGI                                                          |
| 148                        | <i>Nipponia nippon</i>                 | Ibis               | ASM70822v1     | NCBI   | BGI                                                          |
| 149                        | <i>Egretta garzetta</i>                | Egret              | ASM68718v1     | NCBI   | College of Medicine and Forensics, Xi'an Jiaotong University |
| 150                        | <i>Phaethon lepturus</i>               | Tropicbird         | ASM68728v1     | NCBI   | BGI                                                          |
| <b>Gaviiformes</b>         |                                        |                    |                |        |                                                              |
| 151                        | <i>Gavia stellata</i>                  | Loon               | ASM69087v1     | NCBI   | BGI                                                          |
| <b>Musophagiformes</b>     |                                        |                    |                |        |                                                              |
| 152                        | <i>Tauraco erythrolophus</i>           | Turaco             | ASM70936v1     | NCBI   | BGI                                                          |
| <b>Opisthocomiformes</b>   |                                        |                    |                |        |                                                              |
| 153                        | <i>Opisthocomus hoazin</i>             | Hoatzin            | ASM69207v1     | NCBI   | BGI                                                          |
| <b>Columbiformes</b>       |                                        |                    |                |        |                                                              |
| 154                        | <i>Columba livia</i>                   | Rock dove          | Cliv_1.0       | NCBI   | BGI                                                          |
| <b>Pteroclidiformes</b>    |                                        |                    |                |        |                                                              |
| 155                        | <i>Pterocles gutturalis</i>            | Sandgrouse         | ASM69924v1     | NCBI   | BGI                                                          |
| <b>Apodiformes</b>         |                                        |                    |                |        |                                                              |
| 156                        | <i>Calypte anna</i>                    | Anna's hummingbird | ASM69908v1     | NCBI   | BGI                                                          |
| 157                        | <i>Chaetura pelagica</i>               | Chimney swift      | ChaPel_1.0     | NCBI   | BGI                                                          |
| <b>Caprimulgiformes</b>    |                                        |                    |                |        |                                                              |
| 158                        | <i>Caprimulgus carolinensis</i>        | Chuck-will's-widow | ASM70074v1     | NCBI   | BGI                                                          |
| <b>Eurypygiiformes</b>     |                                        |                    |                |        |                                                              |
| 159                        | <i>Eurypyga helias</i>                 | Sunbittern         | ASM69077v1     | NCBI   | BGI                                                          |
| <b>Mesitornithiformes</b>  |                                        |                    |                |        |                                                              |
| 160                        | <i>Mesitornis unicolor</i>             | Mesite             | ASM69576v1     | NCBI   | BGI                                                          |
| <b>Podicipediformes</b>    |                                        |                    |                |        |                                                              |
| 161                        | <i>Podiceps cristatus</i>              | Grebe              | ASM69954v1     | NCBI   | BGI                                                          |
| <b>Phoenicopteriformes</b> |                                        |                    |                |        |                                                              |



| No                      | Systematic Name                    | Common Name           | Genome Version                                                                                           | Source          | Submitter                                          |
|-------------------------|------------------------------------|-----------------------|----------------------------------------------------------------------------------------------------------|-----------------|----------------------------------------------------|
| 162                     | <i>Phoenicopterus ruber ruber</i>  | Flamingo              | ASM68726v1                                                                                               | NCBI            | BGI                                                |
| <b>Crocodylia</b>       |                                    |                       |                                                                                                          |                 |                                                    |
| 163                     | <i>Alligator mississippiensis</i>  | American alligator    | allMis1                                                                                                  | UCSC            | ICGWG                                              |
| 164                     | <i>Alligator sinensis</i>          | Chinese alligator     | ASM45574v1                                                                                               | NCBI            | BGI                                                |
| 165                     | <i>Crocodylus porosus</i>          | Saltwater crocodile   | Cpor.2.0                                                                                                 | NCBI            | ICGWG                                              |
| 166                     | <i>Gavialis gangeticus</i>         | Gharial crocodile     | ggan_v0.2                                                                                                | NCBI            | ICGWG                                              |
| <b>Squamata</b>         |                                    |                       |                                                                                                          |                 |                                                    |
| 167                     | <i>Pogona vitticeps</i>            | Bearded dragon        | Pogona_vitticeps.male                                                                                    | Private (Terry) | -                                                  |
| 168                     | <i>Anolis carolinensis</i>         | Anole lizard          | anoCar2                                                                                                  | UCSC            | Broad                                              |
| 169                     | <i>Vipera berus berus</i>          | Common European viper | Vber.be.1.0                                                                                              | NCBI            | BCM-HGSC                                           |
| 170                     | <i>Crotalus mitchellii pyrrhus</i> | Pit viper             | CrotMitch1.0                                                                                             | NCBI            | Reed College                                       |
| 171                     | <i>Ophiophagus hannah</i>          | King cobra            | OphHan1.0                                                                                                | NCBI            | Naturalis Biodiversity Center                      |
| 172                     | <i>Python bivittatus</i>           | Burmese python        | Python_molurus_bivittatus-5.0.2                                                                          | NCBI            | The Consortium for Comparative Genomics, UC Denver |
| <b>AMPHIBIA</b>         |                                    |                       |                                                                                                          |                 |                                                    |
| <b>Anura</b>            |                                    |                       |                                                                                                          |                 |                                                    |
| 173                     | <i>Nanorana parkeri</i>            | Tibetan frog          | ASM93562v1                                                                                               | NCBI            | BGI                                                |
| 174                     | <i>Xenopus laevis</i>              | African clawed frog   | Xenopus_laevis_v2                                                                                        | NCBI            | International Xenopus Sequencing Consortium        |
| 175                     | <i>Xenopus tropicalis</i>          | Western clawed frog   | Xtropicalis_v7                                                                                           | NCBI            | JGI                                                |
| <b>NEOPTERYGII</b>      |                                    |                       |                                                                                                          |                 |                                                    |
| <b>Lepisosteiformes</b> |                                    |                       |                                                                                                          |                 |                                                    |
| 176                     | <i>Lepisosteus oculatus</i>        | Spotted gar           | LepOcu1                                                                                                  | NCBI            | Broad                                              |
| <b>Anguilliformes</b>   |                                    |                       |                                                                                                          |                 |                                                    |
| 177                     | <i>Anguilla anguilla</i>           | European eel          | Anguilla_anguilla_v1_09_nov_10                                                                           | NCBI            | ZF-S                                               |
| 178                     | <i>Anguilla japonica</i>           | Japanese eel          | japanese_eel_genome_v1.25_oct.2011_japonica_c401b400k25m200_sspacepremium_k3a02n24_extra.final.scaffolds | NCBI            | ZF-S                                               |
| <b>Cypriniformes</b>    |                                    |                       |                                                                                                          |                 |                                                    |
| 179                     | <i>Danio rerio</i>                 | Zebrafish             | danRer7                                                                                                  | UCSC            | WTSI                                               |

| No                        | Systematic Name                 | Common Name            | Genome Version                        | Source          | Submitter                                                |
|---------------------------|---------------------------------|------------------------|---------------------------------------|-----------------|----------------------------------------------------------|
| <b>Characiformes</b>      |                                 |                        |                                       |                 |                                                          |
| 180                       | <i>Astyanax mexicanus</i>       | Mexican tetra          | Astyanax_mexicanus-1.0.2              | NCBI            | AGM                                                      |
| <b>Beloniformes</b>       |                                 |                        |                                       |                 |                                                          |
| 181                       | <i>Oryzias latipes</i>          | Medaka                 | ASM31367v1                            | NCBI            | Medaka genome sequencing project                         |
| <b>Cyprinodontiformes</b> |                                 |                        |                                       |                 |                                                          |
| 182                       | <i>Poecilia formosa</i>         | Amazon molly           | Poecilia_formosa-5.1.2                | NCBI            | AGM                                                      |
| 183                       | <i>Xiphophorus maculatus</i>    | Southern platyfish     | Xiphophorus_maculatus-4.4.2           | NCBI            | The Genome Institute, Washington University at St. Louis |
| 184                       | <i>Fundulus heteroclitus</i>    | Mummichog              | Fundulus_heteroclitus-3.0.2           | NCBI            | WashU                                                    |
| <b>Tetraodontiformes</b>  |                                 |                        |                                       |                 |                                                          |
| 185                       | <i>Takifugu flavidus</i>        | Yellowbelly pufferfish | version 1 of Takifugu flavidus genome | NCBI            | IOCAS                                                    |
| 186                       | <i>Takifugu rubripes</i>        | Fugu                   | fr3                                   | UCSC            | The Fugu Genome Sequencing Consortium                    |
| 187                       | <i>Tetraodon nigroviridis</i>   | Tetraodon              | tetNig2                               | UCSC            | Genoscope                                                |
| <b>Pleuronectiformes</b>  |                                 |                        |                                       |                 |                                                          |
| 188                       | <i>Cynoglossus semilaevis</i>   | Tongue sole            | Cse_v1.0                              | NCBI            | BGI                                                      |
| <b>Perciformes</b>        |                                 |                        |                                       |                 |                                                          |
| 189                       | <i>Haplochromis burtoni</i>     | Burton's haplo         | AstBur1.0                             | NCBI            | Broad                                                    |
| 190                       | <i>Pundamilia nyererei</i>      | Flameback cichlid      | PunNye1.0                             | NCBI            | Broad                                                    |
| 191                       | <i>Maylandia zebra</i>          | Zebra mbuna            | MetZeb1.1                             | NCBI            | Broad                                                    |
| 192                       | <i>Neolamprologus brichardi</i> | Fairy cichlid          | NeoBri1.0                             | NCBI            | Broad                                                    |
| 193                       | <i>Oreochromis niloticus</i>    | Nile tilapia           | oreNil2                               | UCSC            | Broad                                                    |
| 194                       | <i>Sebastes nigrocinctus</i>    | Tiger rockfish         | Snig1.0                               | NCBI            | USC                                                      |
| 195                       | <i>Sebastes rubrivinctus</i>    | Flag rockfish          | SRub1.0                               | NCBI            | USC                                                      |
| 196                       | <i>Gasterosteus aculeatus</i>   | Stickleback            | gasAcu1                               | UCSC            | Broad                                                    |
| <b>Gadiformes</b>         |                                 |                        |                                       |                 |                                                          |
| 197                       | <i>Gadus morhua</i>             | Atlantic cod           | gadMor1                               | UCSC            | Genofisk                                                 |
| <b>CHONDRICHTHYES</b>     |                                 |                        |                                       |                 |                                                          |
| <b>Chimaeriformes</b>     |                                 |                        |                                       |                 |                                                          |
| 198                       | <i>Callorhynchus milii</i>      | Australian ghostshark  | Callorhynchus_milii-6.1.3             | NCBI            | IMCB                                                     |
| <b>Carcharhiniformes</b>  |                                 |                        |                                       |                 |                                                          |
| 199                       | <i>Carcharhinus brachyurus</i>  | Copper shark           | shark_ass                             | Private (Terry) | -                                                        |
| <b>ECDYSOZOA</b>          |                                 |                        |                                       |                 |                                                          |
| <b>Ephemeroptera</b>      |                                 |                        |                                       |                 |                                                          |

| No                  | Systematic Name                   | Common Name              | Genome Version                            | Source | Submitter                                              |
|---------------------|-----------------------------------|--------------------------|-------------------------------------------|--------|--------------------------------------------------------|
| 200                 | <i>Ephemera danica</i>            | Green drake              | Edan_1.0                                  | NCBI   | i5k                                                    |
| <b>Odonata</b>      |                                   |                          |                                           |        |                                                        |
| 201                 | <i>Ladona fulva</i>               | Dragonfly                | Lful_1.0                                  | NCBI   | i5k                                                    |
| <b>Phthiraptera</b> |                                   |                          |                                           |        |                                                        |
| 202                 | <i>Pediculus humanus corporis</i> | Body louse               | JCVLLOUSE_1.0                             | NCBI   | JCVI                                                   |
| <b>Thysanoptera</b> |                                   |                          |                                           |        |                                                        |
| 203                 | <i>Frankliniella occidentalis</i> | Flower thrips            | Focc_1.0                                  | NCBI   | i5k                                                    |
| <b>Hemiptera</b>    |                                   |                          |                                           |        |                                                        |
| 204                 | <i>Diaphorina citri</i>           | Asian citrus psyllid     | Diaci psyllid genome assembly version 1.1 | NCBI   | International Psyllid Genome Consortium                |
| 205                 | <i>Pachypsylla venusta</i>        | Petiolegall psyllid      | Pven_1.0                                  | NCBI   | i5k                                                    |
| 206                 | <i>Acyrtosiphon pisum</i>         | Pea aphid                | Acyr_2.0                                  | NCBI   | BCM                                                    |
| 207                 | <i>Nilaparvata lugens</i>         | Brown planthopper        | NilLug1.0                                 | NCBI   | Nilaparvata lugens Genome Consortium                   |
| 208                 | <i>Oncopeltus fasciatus</i>       | Milkweed bug             | Ofas_1.0                                  | NCBI   | BCM-HGSC i5k                                           |
| 209                 | <i>Rhodnius prolixus</i>          | Assassin bug             | Rhodnius_prolixus-3.0.1                   | NCBI   | WashU                                                  |
| 210                 | <i>Cimex lectularius</i>          | Bed bug                  | Clec_1.0                                  | NCBI   | i5k                                                    |
| <b>Coleoptera</b>   |                                   |                          |                                           |        |                                                        |
| 211                 | <i>Onthophagus taurus</i>         | Taurus scarab            | Otau_1.0                                  | NCBI   | i5k                                                    |
| 212                 | <i>Agilus planipennis</i>         | Emerald ash borer        | Apla_1.0                                  | NCBI   | BCM-HGSC i5k                                           |
| 213                 | <i>Tribolium castaneum</i>        | Red flour beetle         | Tcas_3.0                                  | NCBI   | BCM                                                    |
| 214                 | <i>Anoplophora glabripennis</i>   | Asian long-horned beetle | Agla_1.0                                  | NCBI   | i5k                                                    |
| 215                 | <i>Leptinotarsa decemlineata</i>  | Colorado potato beetle   | Ldec_1.5                                  | NCBI   | i5k                                                    |
| 216                 | <i>Dendroctonus ponderosae</i>    | Mountain pine beetle     | DendPond_male_1.0                         | NCBI   | The Tria Project: Mountain Pine Beetle System Genomics |
| <b>Strepsiptera</b> |                                   |                          |                                           |        |                                                        |
| 217                 | <i>Mengenilla moldrzyki</i>       | Twisted-wing parasite    | Memo_1.0                                  | NCBI   | Zoologisches Forschungsmuseum Alexander Koenig         |
| <b>Diptera</b>      |                                   |                          |                                           |        |                                                        |
| 218                 | <i>Aedes aegypti</i>              | Yellow fever mosquito    | AaegL2                                    | NCBI   | TIGR                                                   |
| 219                 | <i>Culex quinquefasciatus</i>     | Southern house mosquito  | CulPip1.0                                 | NCBI   | Broad                                                  |
| 220                 | <i>Anopheles albimanus</i>        | -                        | Anop_albi_ALBI9_A_V1                      | NCBI   | Broad                                                  |

| No  | Systematic Name                  | Common Name              | Genome Version              | Source | Submitter                                                 |
|-----|----------------------------------|--------------------------|-----------------------------|--------|-----------------------------------------------------------|
| 221 | <i>Anopheles arabiensis</i>      | -                        | Anop_arab_DONG5_A_V1        | NCBI   | Broad                                                     |
| 222 | <i>Anopheles atroparvus</i>      | -                        | Anop_atro_EBRO_V1           | NCBI   | Broad                                                     |
| 223 | <i>Anopheles christyi</i>        | -                        | Anop_chri_ACHKN1017_V1      | NCBI   | Broad                                                     |
| 224 | <i>Anopheles culicifacies</i>    | -                        | Anop_culi_species_A-37_1_V1 | NCBI   | Broad                                                     |
| 225 | <i>Anopheles darlingi</i>        | -                        | A_darlingi_v1               | NCBI   | Laboratorio Nacional de Computacao Cientifica             |
| 226 | <i>Anopheles dirus</i>           | -                        | Anop_diru_WRAIR2_V1         | NCBI   | Broad                                                     |
| 227 | <i>Anopheles epiroticus</i>      | -                        | Anop_epir_epiroticus2_V1    | NCBI   | Broad                                                     |
| 228 | <i>Anopheles farauti</i>         | -                        | Anop_fara_FAR1_V2           | NCBI   | Broad                                                     |
| 229 | <i>Anopheles funestus</i>        | -                        | Anop_fune_FUMOZ_V1          | NCBI   | Broad                                                     |
| 230 | <i>Anopheles gambiae</i>         | African malaria mosquito | anoGam1                     | UCSC   | International Anopheles Genome Project                    |
| 231 | <i>Anopheles maculatus</i>       | -                        | Anop_macu_maculatus3_V1     | NCBI   | Broad                                                     |
| 232 | <i>Anopheles melas</i>           | -                        | Anop_mela_CM1001059_A_V2    | NCBI   | Broad                                                     |
| 233 | <i>Anopheles merus</i>           | -                        | Anop_meru_MAF_V1            | NCBI   | Broad                                                     |
| 234 | <i>Anopheles minimus</i>         | -                        | Anop_mini_MINIMUS1_V1       | NCBI   | Broad                                                     |
| 235 | <i>Anopheles quadriannulatus</i> | -                        | Anop_quad_QUAD4_A_V1        | NCBI   | Broad                                                     |
| 236 | <i>Anopheles sinensis</i>        | -                        | AS2                         | NCBI   | Nanjing Medical University                                |
| 237 | <i>Anopheles stephensi</i>       | -                        | ASM30077v2                  | NCBI   | Virginia Tech                                             |
| 238 | <i>Mayetiola destructor</i>      | Hessian fly              | Mdes_1.0                    | NCBI   | BCM                                                       |
| 239 | <i>Lutzomyia longipalpis</i>     | Sand fly                 | Llon_1.0                    | NCBI   | BCM                                                       |
| 240 | <i>Phlebotomus papatasi</i>      | -                        | Ppap_1.0                    | NCBI   | WashU                                                     |
| 241 | <i>Ceratitis capitata</i>        | Med fly                  | Ccap_1.0                    | NCBI   | i5k                                                       |
| 242 | <i>Drosophila albomicans</i>     | -                        | DroAlb_1.0                  | NCBI   | Kunming Institute of Zoology, Chinese Academy of Sciences |
| 243 | <i>Drosophila ananassae</i>      | -                        | droAna3                     | UCSC   | Agen                                                      |
| 244 | <i>Drosophila biarmipes</i>      | -                        | Dbia_2.0                    | NCBI   | BCM                                                       |
| 245 | <i>Drosophila bipectinata</i>    | -                        | Dbip_2.0                    | NCBI   | BCM                                                       |
| 246 | <i>Drosophila elegans</i>        | -                        | Dele_2.0                    | NCBI   | BCM                                                       |

| No                 | Systematic Name                               | Common Name           | Genome Version             | Source | Submitter                                                                 |
|--------------------|-----------------------------------------------|-----------------------|----------------------------|--------|---------------------------------------------------------------------------|
| 247                | <i>Drosophila erecta</i>                      | -                     | droEre2                    | UCSC   | Agen                                                                      |
| 248                | <i>Drosophila eugracilis</i>                  | -                     | Deug_2.0                   | NCBI   | modENCODE                                                                 |
| 249                | <i>Drosophila ficusphila</i>                  | -                     | Dfic_2.0                   | NCBI   | BCM                                                                       |
| 250                | <i>Drosophila grimshawi</i>                   | -                     | droGri2                    | UCSC   | Agen                                                                      |
| 251                | <i>Drosophila kikkawai</i>                    | -                     | Dkik_2.0                   | NCBI   | BCM                                                                       |
| 252                | <i>Drosophila melanogaster</i>                | -                     | Release 6 plus ISO1 MT     | NCBI   | The FlyBase Consortium/Berkeley Drosophila Genome Project/Celera Genomics |
| 253                | <i>Drosophila miranda</i>                     | -                     | DroMir_2.2                 | NCBI   | University of California, Berkeley                                        |
| 254                | <i>Drosophila mojavensis</i>                  | -                     | droMoj3                    | UCSC   | Agen                                                                      |
| 255                | <i>Drosophila persimilis</i>                  | -                     | droPer1                    | UCSC   | Broad                                                                     |
| 256                | <i>Drosophila pseudoobscura pseudoobscura</i> | -                     | Dpse_3.0                   | NCBI   | BCM                                                                       |
| 257                | <i>Drosophila rhopaloa</i>                    | -                     | Drho_2.0                   | NCBI   | modENCODE                                                                 |
| 258                | <i>Drosophila sechellia</i>                   | -                     | droSec1                    | UCSC   | Broad                                                                     |
| 259                | <i>Drosophila simulans</i>                    | -                     | dsim_caf1                  | NCBI   | WashU                                                                     |
| 260                | <i>Drosophila suzukii</i>                     | -                     | Dsuzukii.v01               | NCBI   | BGI                                                                       |
| 261                | <i>Drosophila takahashii</i>                  | -                     | Dtak_2.0                   | NCBI   | BCM                                                                       |
| 262                | <i>Drosophila virilis</i>                     | -                     | droVir3                    | UCSC   | Agen                                                                      |
| 263                | <i>Drosophila willistoni</i>                  | -                     | dwil_caf1                  | NCBI   | JCVI                                                                      |
| 264                | <i>Drosophila yakuba</i>                      | -                     | dyak_caf1                  | NCBI   | FlyBase                                                                   |
| 265                | <i>Musca domestica</i>                        | House fly             | Musca_domestica-2.0.2      | NCBI   | GGC                                                                       |
| 266                | <i>Glossina austeni</i>                       | Tsetse fly            | Glossina_austeni-1.0.3     | NCBI   | GGC                                                                       |
| 267                | <i>Glossina brevipalpis</i>                   | -                     | Glossina_brevipalpis_1.0.3 | NCBI   | GGC                                                                       |
| 268                | <i>Glossina fuscipes fuscipes</i>             | -                     | Glossina_fuscipes-3.0.2    | NCBI   | GGC                                                                       |
| 269                | <i>Glossina morsitans morsitans</i>           | -                     | ASM107743v1                | NCBI   | WTSI                                                                      |
| 270                | <i>Glossina pallidipes</i>                    | -                     | Glossina_pallidipes-1.0.3  | NCBI   | GGC                                                                       |
| <b>Trichoptera</b> |                                               |                       |                            |        |                                                                           |
| 271                | <i>Limnephilus lunatus</i>                    | Caddis fly            | Llun_1.0                   | NCBI   | i5k                                                                       |
| <b>Lepidoptera</b> |                                               |                       |                            |        |                                                                           |
| 272                | <i>Papilio glaucus</i>                        | Tiger butterfly       | pgl_assembly_v1            | NCBI   | UT Southwestern Medical Center                                            |
| 273                | <i>Papilio polytes</i>                        | Mormon butterfly      | Ppol_1.0                   | NCBI   | TokyoTech                                                                 |
| 274                | <i>Papilio xuthus</i>                         | Swallowtail butterfly | Pxut_1.0                   | NCBI   | TokyoTech                                                                 |

| No                 | Systematic Name                       | Common Name            | Genome Version   | Source | Submitter                                               |
|--------------------|---------------------------------------|------------------------|------------------|--------|---------------------------------------------------------|
| 275                | <i>Heliconius melpomene melpomene</i> | Postman butterfly      | ASM31383v2       | NCBI   | Heliconius Genome Sequencing Consortium                 |
| 276                | <i>Melitaea cinxia</i>                | Glanville fritillary   | MelCinx1.0       | NCBI   | University of Helsinki                                  |
| 277                | <i>Danaus plexippus</i>               | Monarch butterfly      | DanPle_1.0       | NCBI   | The Reppert Lab                                         |
| 278                | <i>Bombyx mori</i>                    | Silkworm               | ASM15162v1       | NCBI   | The International Silkworm Genome Sequencing Consortium |
| 279                | <i>Manduca sexta</i>                  | Tobacco hornworm       | Msex_1.0         | NCBI   | BCM                                                     |
| 280                | <i>Plutella xylostella</i>            | Diamondback moth       | DBM_FJ_V1.1      | NCBI   | Plutella xylostella Genome Consortium                   |
| <b>Hymenoptera</b> |                                       |                        |                  |        |                                                         |
| 281                | <i>Athalia rosae</i>                  | Turnip sawfly          | Aros_1.0         | NCBI   | i5k                                                     |
| 282                | <i>Cephus cinctus</i>                 | Wheat stem sawfly      | Ccin1            | NCBI   | UIUC                                                    |
| 283                | <i>Orussus abietinus</i>              | Parasitic wood wasp    | Oabi_1.0         | NCBI   | i5k                                                     |
| 284                | <i>Ceratosolen solmsi marchali</i>    | Pollinating wasp       | CerSol_1.0       | NCBI   | Ceratosolen solmsi Genome Consortium                    |
| 285                | <i>Nasonia giraulti</i>               | Jewel wasp             | Ngir_1.0         | NCBI   | BCM                                                     |
| 286                | <i>Nasonia longicornis</i>            | -                      | Nlon_1.0         | NCBI   | BCM                                                     |
| 287                | <i>Nasonia vitripennis</i>            | -                      | Nvit_2.1         | NCBI   | BCM                                                     |
| 288                | <i>Copidosoma floridanum</i>          | Looper parasitoid wasp | Cflo_1.0         | NCBI   | i5k                                                     |
| 289                | <i>Trichogramma pretiosum</i>         | -                      | Tpre_1.0         | NCBI   | i5k                                                     |
| 290                | <i>Microplitis demolitor</i>          | -                      | Mdem1            | NCBI   | UIUC                                                    |
| 291                | <i>Megachile rotundata</i>            | Alfalfa leafcutter bee | MROT_1.0         | NCBI   | University of Maryland                                  |
| 292                | <i>Apis dorsata</i>                   | Giant honey bee        | Apis dorsata 1.3 | NCBI   | Cold Spring Harbor Laboratory                           |
| 293                | <i>Apis florea</i>                    | Dwarf honey bee        | Aflo_1.0         | NCBI   | BCM                                                     |
| 294                | <i>Apis mellifera</i>                 | Western honey bee      | Amel_4.5         | NCBI   | Human Genome Sequencing Center                          |

| No                       | Systematic Name                  | Common Name               | Genome Version            | Source | Submitter                                    |
|--------------------------|----------------------------------|---------------------------|---------------------------|--------|----------------------------------------------|
| 295                      | <i>Bombus impatiens</i>          | Common Eastern bumblebee  | BIMP_2.0                  | NCBI   | Biotechnology Center, University of Illinois |
| 296                      | <i>Bombus terrestris</i>         | Buff-tailed bumblebee     | Bter_1.0                  | NCBI   | BCM                                          |
| 297                      | <i>Linepithema humile</i>        | Argentine ant             | Lhum_UMD_V04              | NCBI   | AGC                                          |
| 298                      | <i>Camponotus floridanus</i>     | Florida carpenter ant     | CamFlo_1.0                | NCBI   | BGI                                          |
| 299                      | <i>Acromyrmex echinator</i>      | Panamanian leafcutter ant | Aech_3.9                  | NCBI   | BGI                                          |
| 300                      | <i>Atta cephalotes</i>           | Leafcutter ant            | Attacep1.0                | NCBI   | WashU                                        |
| 301                      | <i>Solenopsis invicta</i>        | Red imported fire ant     | Si_gnG                    | NCBI   | UNIL                                         |
| 302                      | <i>Pogonomyrmex barbatus</i>     | Red harvester ant         | Pbar_UMD_V03              | NCBI   | AGC                                          |
| 303                      | <i>Harpegnathos saltator</i>     | Jumping ant               | HarSal_1.0                | NCBI   | BGI                                          |
| 304                      | <i>Cerapachys biroi</i>          | Clonal raider ant         | CerBir1.0                 | NCBI   | BGI                                          |
| <b>Blattodea</b>         |                                  |                           |                           |        |                                              |
| 305                      | <i>Blattella germanica</i>       | German cockroach          | Bger_1.0                  | NCBI   | i5k                                          |
| <b>Isoptera</b>          |                                  |                           |                           |        |                                              |
| 306                      | <i>Zootermopsis nevadensis</i>   | Eusocial termite          | ZooNev1.0                 | NCBI   | BGI                                          |
| <b>Orthoptera</b>        |                                  |                           |                           |        |                                              |
| 307                      | <i>Locusta migratoria</i>        | Migratory locust          | LocustGenomeV1            | NCBI   | Chinese Academy of Sciences                  |
| <b>Diplostraca</b>       |                                  |                           |                           |        |                                              |
| 308                      | <i>Daphnia pulex</i>             | Water flea                | V1.0                      | NCBI   | JGI                                          |
| <b>Calanoida</b>         |                                  |                           |                           |        |                                              |
| 309                      | <i>Eurytemora affinis</i>        | Copepod                   | Eaff_1.0                  | NCBI   | i5k                                          |
| <b>Siphonostomatoida</b> |                                  |                           |                           |        |                                              |
| 310                      | <i>Lepeophtheirus salmonis</i>   | Salmon louse              | lsal_atl.canada_female_v1 | NCBI   | Jong S Leong, Ben F Koop, Eric B Rondeau     |
| <b>Amphipoda</b>         |                                  |                           |                           |        |                                              |
| 311                      | <i>Hyalella azteca</i>           | Scud                      | Hazt_1.0                  | NCBI   | BCM                                          |
| <b>Geophilomorpha</b>    |                                  |                           |                           |        |                                              |
| 312                      | <i>Strigamia maritima</i>        | European centipede        | Smar_1.0                  | NCBI   | BCM                                          |
| <b>Araneae</b>           |                                  |                           |                           |        |                                              |
| 313                      | <i>Stegodyphus mimosarum</i>     | Social spider             | Stegodyphus_mimosarum_v1  | NCBI   | BGI                                          |
| 314                      | <i>Latrodectus hesperus</i>      | Black widow               | Lhes_1.0                  | NCBI   | i5k                                          |
| 315                      | <i>Parasteatoda tepidariorum</i> | Common house spider       | Ptep_1.0                  | NCBI   | i5k                                          |
| <b>Prostigmata</b>       |                                  |                           |                           |        |                                              |

| No                     | Systematic Name                     | Common Name                   | Genome Version             | Source | Submitter                                                                              |
|------------------------|-------------------------------------|-------------------------------|----------------------------|--------|----------------------------------------------------------------------------------------|
| 316                    | <i>Tetranychus urticae</i>          | Red spider mite               | ASM23943v1                 | NCBI   | Spider Mite Consortium                                                                 |
| <b>Astigmata</b>       |                                     |                               |                            |        |                                                                                        |
| 317                    | <i>Dermatophagoides farinae</i>     | House dust mite               | Dfarinae1.0                | NCBI   | CUHK                                                                                   |
| 318                    | <i>Sarcoptes scabiei type canis</i> | Dog mite                      | SarSca1.0                  | NCBI   | Wright State University                                                                |
| <b>Oribatida</b>       |                                     |                               |                            |        |                                                                                        |
| 319                    | <i>Achipteria coleoptrata</i>       | -                             | SM98876v1                  | NCBI   | UNIL                                                                                   |
| 320                    | <i>Hypochthonius rufulus</i>        | -                             | ASM98884v1                 | NCBI   | UNIL                                                                                   |
| 321                    | <i>Platynothrus peltifer</i>        | Oribatid mite                 | ASM98890v1                 | NCBI   | UNIL                                                                                   |
| 322                    | <i>Steganacarus magnus</i>          | -                             | ASM98888v1                 | NCBI   | UNIL                                                                                   |
| <b>Ixodida</b>         |                                     |                               |                            |        |                                                                                        |
| 323                    | <i>Ixodes ricinus</i>               | Castor bean tick              | ASM97304v1                 | NCBI   | Luxembourg Institute of Health                                                         |
| 324                    | <i>Ixodes scapularis</i>            | Deer tick                     | JCVLISG_i3_1.0             | NCBI   | JCVI                                                                                   |
| 325                    | <i>Rhipicephalus microplus</i>      | Cattle tick                   | CCG_Rmi_1.0                | NCBI   | USDA-ARS                                                                               |
| <b>Mesostigmata</b>    |                                     |                               |                            |        |                                                                                        |
| 326                    | <i>Metaseiulus occidentalis</i>     | Western predatory mite        | Mocc_1.0                   | NCBI   | BCM                                                                                    |
| 327                    | <i>Varroa destructor</i>            | Honeybee mite                 | BRL_Vdes_1.0               | NCBI   | Varroa Genome Sequencing Consortium                                                    |
| <b>Scorpiones</b>      |                                     |                               |                            |        |                                                                                        |
| 328                    | <i>Centruroides exilicauda</i>      | Baja california bark scorpion | Cexi_1.0                   | NCBI   | i5k                                                                                    |
| 329                    | <i>Mesobuthus martensii</i>         | Chinese scorpion              | M_martensii_Version_1      | NCBI   | Institute of Plant Physiology & Ecology, Shanghai Institutes for Biology Sciences, CAS |
| <b>Xiphosura</b>       |                                     |                               |                            |        |                                                                                        |
| 330                    | <i>Limulus polyphemus</i>           | Atlantic horseshoe crab       | Limulus_polyphemus-2.1.2   | NCBI   | WashU                                                                                  |
| <b>Trichocephalida</b> |                                     |                               |                            |        |                                                                                        |
| 331                    | <i>Trichinella spiralis</i>         | Pork worm                     | Trichinella spiralis-3.7.1 | NCBI   | WashU                                                                                  |
| <b>Ascaridida</b>      |                                     |                               |                            |        |                                                                                        |
| 332                    | <i>Ascaris suum</i>                 | Pig roundworm                 | AscSuum_1.0                | NCBI   | BGI                                                                                    |
| <b>Spirurida</b>       |                                     |                               |                            |        |                                                                                        |
| 333                    | <i>Elaeophora elaphi</i>            | Red deer nematode             | EEL001                     | NCBI   | WTSI                                                                                   |
| 334                    | <i>Onchocerca volvulus</i>          | -                             | OVOC001                    | NCBI   | WTSI                                                                                   |



| No                      | Systematic Name                       | Common Name         | Genome Version                    | Source | Submitter                                                  |
|-------------------------|---------------------------------------|---------------------|-----------------------------------|--------|------------------------------------------------------------|
| <b>Rhabditida</b>       |                                       |                     |                                   |        |                                                            |
| 335                     | <i>Steinernema monticolum</i>         | -                   | S_monti_v1                        | NCBI   | Caltech                                                    |
| 336                     | <i>Panagrellus redivivus</i>          | Microworm           | Pred3                             | NCBI   | Caltech                                                    |
| 337                     | <i>Haemonchus contortus</i>           | Wireworm            | HCON                              | NCBI   | WTSI                                                       |
| 338                     | <i>Necator americanus</i>             | Human hookworm      | N_americanus_v1                   | NCBI   | WashU                                                      |
| 339                     | <i>Heterorhabditis bacteriophora</i>  | Beneficial nematode | Heterorhabditis_bacteriophora-7.0 | NCBI   | WashU                                                      |
| 340                     | <i>Caenorhabditis angaria</i>         | -                   | ps1010rel4                        | NCBI   | California Institute of Technology, Division of Biology    |
| 341                     | <i>Caenorhabditis brenneri</i>        | -                   | C_brenneri-6.0.1b                 | NCBI   | Caenorhabditis brenneri Sequencing and Analysis Consortium |
| 342                     | <i>Caenorhabditis briggsae</i>        | -                   | ASM455v1                          | NCBI   | The C.briggsae Sequencing Consortium                       |
| 343                     | <i>Caenorhabditis elegans</i>         | -                   | WBcel235                          | NCBI   | C. elegans Sequencing Consortium                           |
| 344                     | <i>Caenorhabditis japonica</i>        | -                   | C_japonica-7.0.1                  | NCBI   | WashU                                                      |
| 345                     | <i>Caenorhabditis sp. 11 MAF-2010</i> | -                   | Caenorhabditis_sp11_JU1373-3.0.1  | NCBI   | WashU                                                      |
| <b>Priapulimorphida</b> |                                       |                     |                                   |        |                                                            |
| 346                     | <i>Priapululus caudatus</i>           | Cactus worm         | Priapululus_caudatus-4.0.1        | NCBI   | WashU                                                      |
| <b>ROTIFERA</b>         |                                       |                     |                                   |        |                                                            |
| <b>Bdelloidea</b>       |                                       |                     |                                   |        |                                                            |
| 347                     | <i>Adineta vaga</i>                   | Rotifer             | AMS_PRJEB1171_v1                  | NCBI   | Genoscope CEA                                              |
| <b>PLATYHELMINTHES</b>  |                                       |                     |                                   |        |                                                            |
| <b>Strigeidida</b>      |                                       |                     |                                   |        |                                                            |
| 348                     | <i>Schistosoma curassoni</i>          | -                   | S_curassoni_Dakar                 | NCBI   | WTSI                                                       |
| 349                     | <i>Schistosoma haematobium</i>        | -                   | SchHae.1.0                        | NCBI   | CHGC                                                       |
| 350                     | <i>Schistosoma japonicum</i>          | -                   | ASM15177v1                        | NCBI   | CHGC                                                       |
| 351                     | <i>Schistosoma mansoni</i>            | -                   | ASM23792v2                        | NCBI   | Schistosoma Genome Network                                 |
| 352                     | <i>Schistosoma margrebowiei</i>       | -                   | S_margrebowiei_Zambia             | NCBI   | WTSI                                                       |
| 353                     | <i>Schistosoma mattheei</i>           | -                   | S_mattheei_Denwood                | NCBI   | WTSI                                                       |

| No                        | Systematic Name                    | Common Name         | Genome Version           | Source | Submitter                                                                        |
|---------------------------|------------------------------------|---------------------|--------------------------|--------|----------------------------------------------------------------------------------|
| 354                       | <i>Schistosoma rodhaini</i>        | -                   | S_rodhaini_Burundi       | NCBI   | WTSI                                                                             |
| <b>Opisthorchiida</b>     |                                    |                     |                          |        |                                                                                  |
| 355                       | <i>Clonorchis sinensis</i>         | Chinese liver fluke | C_sinensis-2.0           | NCBI   | Department of Parasitology, Zhongshan School of Medicine, Sun Yat-sen University |
| <b>Cyclophyllidea</b>     |                                    |                     |                          |        |                                                                                  |
| 356                       | <i>Echinococcus granulosus</i>     | Hyper tapeworm      | EGRAN001                 | NCBI   | WTSI                                                                             |
| 357                       | <i>Echinococcus multilocularis</i> | Fox tapeworm        | EMULTI001                | NCBI   | WTSI                                                                             |
| 358                       | <i>Hymenolepis microstoma</i>      | Rodent tapeworm     | HMIC001                  | NCBI   | WTSI                                                                             |
| <b>Polyopisthocotylea</b> |                                    |                     |                          |        |                                                                                  |
| 359                       | <i>Protopolystoma xenopodis</i>    | Frog parasite       | P_xenopodis_South_Africa | NCBI   | WTSI                                                                             |
| <b>ANNELIDA</b>           |                                    |                     |                          |        |                                                                                  |
| <b>Scolecida</b>          |                                    |                     |                          |        |                                                                                  |
| 360                       | <i>Capitella teleta</i>            | Polychaete worm     | Capca1                   | NCBI   | JGI                                                                              |
| <b>Rhynchobdellida</b>    |                                    |                     |                          |        |                                                                                  |
| 361                       | <i>Helobdella robusta</i>          | Leech               | Helobdella robusta v1.0  | NCBI   | JGI                                                                              |
| <b>MOLLUSCA</b>           |                                    |                     |                          |        |                                                                                  |
| <b>Ostreoida</b>          |                                    |                     |                          |        |                                                                                  |
| 362                       | <i>Crassostrea gigas</i>           | Pacific oyster      | oyster_v9                | NCBI   | BGI                                                                              |
| <b>Gastropoda</b>         |                                    |                     |                          |        |                                                                                  |
| 363                       | <i>Lottia gigantea</i>             | Owl limpet          | Helro1                   | NCBI   | JGI                                                                              |
| 364                       | <i>Aplysia californica</i>         | California sea hare | AplCal3.0                | NCBI   | Broad                                                                            |
| 365                       | <i>Biomphalaria glabrata</i>       | Freshwater snail    | ASM45736v1               | NCBI   | WashU                                                                            |
| <b>CNIDARIA</b>           |                                    |                     |                          |        |                                                                                  |
| <b>Actiniaria</b>         |                                    |                     |                          |        |                                                                                  |
| 366                       | <i>Nematostella vectensis</i>      | Starlet sea anemone | ASM20922v1               | NCBI   | JGI                                                                              |
| <b>Anthoathecata</b>      |                                    |                     |                          |        |                                                                                  |
| 367                       | <i>Hydra vulgaris</i>              | Freshwater polyp    | Hydra_RP_1.0             | NCBI   | JCVI                                                                             |
| <b>TENTACULATA</b>        |                                    |                     |                          |        |                                                                                  |
| <b>Lobata</b>             |                                    |                     |                          |        |                                                                                  |
| 368                       | <i>Mnemiopsis leidyi</i>           | Warty comb jelly    | MneLei_Aug2011           | NCBI   | National Human Genome Research Institute, National Institutes of Health          |

| No                        | Systematic Name                      | Common Name       | Genome Version           | Source | Submitter                                            |
|---------------------------|--------------------------------------|-------------------|--------------------------|--------|------------------------------------------------------|
| <b>PLACOZOA</b>           |                                      |                   |                          |        |                                                      |
| 369                       | <i>Trichoplax adhaerens</i>          | Placozoan         | v1.0                     | NCBI   | JGI                                                  |
| <b>PORIFERA</b>           |                                      |                   |                          |        |                                                      |
| <b>Haplosclerida</b>      |                                      |                   |                          |        |                                                      |
| 370                       | <i>Amphimedon queenslandica</i>      | Sea sponge        | v1.0                     | NCBI   | JGI                                                  |
| <b>ECHINOIDEA</b>         |                                      |                   |                          |        |                                                      |
| <b>Temnopleuroida</b>     |                                      |                   |                          |        |                                                      |
| 371                       | <i>Lytechinus variegatus</i>         | Green sea urchin  | Lvar_0.4                 | NCBI   | BCM                                                  |
| <b>Echinoida</b>          |                                      |                   |                          |        |                                                      |
| 372                       | <i>Strongylocentrotus purpuratus</i> | Purple sea urchin | Spur_3.1                 | NCBI   | BCM                                                  |
| <b>ASTEROIDEA</b>         |                                      |                   |                          |        |                                                      |
| <b>Valvatida</b>          |                                      |                   |                          |        |                                                      |
| 373                       | <i>Patiria miniata</i>               | Bat star          | Pmin_1.0                 | NCBI   | Sea Urchin Genome Sequencing Consortium              |
| <b>ENTEROPNEUSTA</b>      |                                      |                   |                          |        |                                                      |
| 374                       | <i>Saccoglossus kowalevskii</i>      | Acorn worm        | Skow_1.1                 | NCBI   | BCM                                                  |
| <b>TUNICATA</b>           |                                      |                   |                          |        |                                                      |
| <b>Enterogona</b>         |                                      |                   |                          |        |                                                      |
| 375                       | <i>Ciona intestinalis</i>            | Sea squirt        | KH                       | NCBI   | Organization: Department of Zoology, Graduate School |
| 376                       | <i>Ciona savignyi</i>                | -                 | ASM14926v1               | NCBI   | Broad                                                |
| <b>Pleurogona</b>         |                                      |                   |                          |        |                                                      |
| 377                       | <i>Botryllus schlosseri</i>          | Star ascidian     | 356a-chromosome-assembly | NCBI   | Stanford University                                  |
| <b>Copelata</b>           |                                      |                   |                          |        |                                                      |
| 378                       | <i>Oikopleura dioica</i>             | Larvaceans        | ASM20953v1               | NCBI   | Genoscope CEA                                        |
| <b>LEPTOCARDII</b>        |                                      |                   |                          |        |                                                      |
| <b>Amphioxiformes</b>     |                                      |                   |                          |        |                                                      |
| 379                       | <i>Branchiostoma floridae</i>        | Lancelet          | Version 2                | NCBI   | JGI                                                  |
| <b>CEPHALASPIDOMORPHI</b> |                                      |                   |                          |        |                                                      |
| <b>Petromyzontiformes</b> |                                      |                   |                          |        |                                                      |
| 380                       | <i>Lethenteron camtschaticum</i>     | Arctic lamprey    | LetJap1.0                | NCBI   | IMCB                                                 |
| 381                       | <i>Petromyzon marinus</i>            | Sea lamprey       | petMar2                  | UCSC   | WashU                                                |
| <b>SARCOPTERYGII</b>      |                                      |                   |                          |        |                                                      |
| <b>Coelacanthiformes</b>  |                                      |                   |                          |        |                                                      |
| 382                       | <i>Latimeria chalumnae</i>           | Coelacanth        | latCha1                  | UCSC   | Broad                                                |
| <b>FUNGI</b>              |                                      |                   |                          |        |                                                      |

| No                       | Systematic Name                                | Common Name                         | Genome Version                            | Source | Submitter                                     |
|--------------------------|------------------------------------------------|-------------------------------------|-------------------------------------------|--------|-----------------------------------------------|
| <b>AGARICOMYCETES</b>    |                                                |                                     |                                           |        |                                               |
| <b>Agaricales</b>        |                                                |                                     |                                           |        |                                               |
| 383                      | <i>Agaricus bisporus</i> var. <i>bisporus</i>  | Edible basidiomycete mushroom       | ASM30057v2                                | NCBI   | JGI-PSF                                       |
| 384                      | <i>Agaricus bisporus</i> var. <i>burnettii</i> | -                                   | Agabi_varbur_1                            | NCBI   | JGI                                           |
| 385                      | <i>Schizophyllum commune</i>                   | Mushroom                            | v1.0                                      | NCBI   | JGI-PGF                                       |
| 386                      | <i>Coprinopsis cinerea</i>                     | Small mushroom                      | CC3                                       | NCBI   | Broad                                         |
| 387                      | <i>Moniliophthora roreri</i>                   | Frosty pod rot                      | ASM146670v1                               | NCBI   | Purdue University                             |
| 388                      | <i>Laccaria bicolor</i>                        | Tan-colored mushroom                | V1.0                                      | NCBI   | Laccaria Genome Consortium                    |
| <b>Auriculariales</b>    |                                                |                                     |                                           |        |                                               |
| 389                      | <i>Auricularia subglabra</i>                   | Jelly fungi                         | Auricularia subglabra SS-5 V1.0           | NCBI   | JGI                                           |
| <b>Boletales</b>         |                                                |                                     |                                           |        |                                               |
| 390                      | <i>Coniophora puteana</i>                      | Wet rot fungus                      | Conpu1                                    | NCBI   | DOE JGI                                       |
| 391                      | <i>Serpula lacrymans</i>                       | Dry rot fungus                      | v1.0                                      | NCBI   | JGI-PGF                                       |
| <b>Corticiales</b>       |                                                |                                     |                                           |        |                                               |
| 392                      | <i>Punctularia strigosozonata</i>              | Steroid fungi                       | Punctularia strigosozonata v1.0           | NCBI   | JGI                                           |
| <b>Gloeophyllales</b>    |                                                |                                     |                                           |        |                                               |
| 393                      | <i>Gloeophyllum trabeum</i>                    | Brown-rot fungi                     | Glotr1.1                                  | NCBI   | JGI                                           |
| <b>Hymenochaetales</b>   |                                                |                                     |                                           |        |                                               |
| 394                      | <i>Fomitiporia mediterranea</i>                | -                                   | Fomme1                                    | NCBI   | JGI                                           |
| <b>Polyporales</b>       |                                                |                                     |                                           |        |                                               |
| 395                      | <i>Dichomitus squalens</i>                     | Poroid crust fungi                  | Dichomitus squalens v1.0                  | NCBI   | JGI                                           |
| 396                      | <i>Fibroporia radiculosa</i>                   | -                                   | ASM31352v1                                | NCBI   | Forest Products, Mississippi State University |
| 397                      | <i>Phanerochaete carnososa</i>                 | Crust fungus                        | Phanerochaete carnososa HHB-10118-Sp v1.0 | NCBI   | DOE JGI                                       |
| 398                      | <i>Postia placenta</i>                         | Brown rot fungus                    | PosplrSB12.1                              | NCBI   | DOE JGI                                       |
| 399                      | <i>Trametes versicolor</i>                     | Polypore mushroom                   | Trametes versicolor v1.0                  | NCBI   | JGI                                           |
| <b>Russulales</b>        |                                                |                                     |                                           |        |                                               |
| 400                      | <i>Heterobasidion irregulare</i>               | Tree root rotting pathogenic fungus | Heterobasidion irregulare v2.0            | NCBI   | JGI                                           |
| 401                      | <i>Stereum hirsutum</i>                        | False turkey tail                   | Stehi1                                    | NCBI   | JGI                                           |
| <b>CHYTRIDIOMYCETES</b>  |                                                |                                     |                                           |        |                                               |
| <b>Spizellomycetales</b> |                                                |                                     |                                           |        |                                               |

| No                                    | Systematic Name                       | Common Name              | Genome Version                                         | Source | Submitter            |
|---------------------------------------|---------------------------------------|--------------------------|--------------------------------------------------------|--------|----------------------|
| 402                                   | <i>Spizellomyces punctatus</i>        | Chytrid fungus           | S_punctatus.V1                                         | NCBI   | Broad                |
| <b>Rhizophydiales</b>                 |                                       |                          |                                                        |        |                      |
| 403                                   | <i>Batrachochytrium dendrobatidis</i> | Amphibian chytrid fungus | v1.0                                                   | NCBI   | JGI-PGF              |
| <b>DOTHIDEOMYCETES</b>                |                                       |                          |                                                        |        |                      |
| <b>Botryosphaeriales</b>              |                                       |                          |                                                        |        |                      |
| 404                                   | <i>Diplodia corticola</i>             | -                        | ASM188384v1                                            | NCBI   | University of Aveiro |
| 405                                   | <i>Neofusicoccum parvum</i>           | -                        | UCRNP2V3                                               | NCBI   | UC Davis             |
| <b>Capnodiales</b>                    |                                       |                          |                                                        |        |                      |
| 406                                   | <i>Baudoinia panamericana</i>         | -                        | Bauco1                                                 | NCBI   | JGI                  |
| 407                                   | <i>Cercospora beticola</i>            | Fungal plant pathogen    | CB0940.V2                                              | NCBI   | VIB                  |
| 408                                   | <i>Pseudocercospora fijiensis</i>     | Black leaf streak fungus | Mycfi2                                                 | NCBI   | DOE JGI              |
| 409                                   | <i>Sphaerulina musiva</i>             | -                        | Septoria musiva SO2202 v1.0                            | NCBI   | JGI                  |
| 410                                   | <i>Zymoseptoria tritici</i>           | Filamentous fungus       | MYCGR v2.0                                             | NCBI   | DOE JGI              |
| <b>Dothideales</b>                    |                                       |                          |                                                        |        |                      |
| 411                                   | <i>Aureobasidium namibiae</i>         | Black yeast-like fungus  | Aureobasidium pullulans var. namibiae CBS 147.97 v1.0  | NCBI   | DOE JGI              |
| 412                                   | <i>Aureobasidium subglaciale</i>      | -                        | Aureobasidium pullulans var. subglaciale EXF-2481 v1.0 | NCBI   | JGI                  |
| <b>Dothideomycetes incertae sedis</b> |                                       |                          |                                                        |        |                      |
| 413                                   | <i>Coniosporium apollinis</i>         | -                        | Coni_apol.CBS100218_V1                                 | NCBI   | Broad                |
| <b>Pleosporales</b>                   |                                       |                          |                                                        |        |                      |
| 414                                   | <i>Paraphaeosphaeria sporulosa</i>    | -                        | Parsp1                                                 | NCBI   | DOE JGI              |
| 415                                   | <i>Parastagonospora nodorum</i>       | -                        | ASM14691v2                                             | NCBI   | Broad                |
| 416                                   | <i>Leptosphaeria maculans</i>         | Blackleg disease fungus  | ASM23037v1                                             | NCBI   | Genoscope            |
| 417                                   | <i>Alternaria alternata</i>           | -                        | Altal1                                                 | NCBI   | DOE JGI              |
| 418                                   | <i>Bipolaris maydis</i>               | Stalk rot fungus         | CocheC4_1                                              | NCBI   | JGI                  |
| 419                                   | <i>Bipolaris oryzae</i>               | -                        | Cochliobolus miyabeanus v1.0                           | NCBI   | JGI                  |
| 420                                   | <i>Bipolaris sorokiniana</i>          | -                        | Cocsa1                                                 | NCBI   | JGI                  |
| 421                                   | <i>Bipolaris victoriae</i>            | -                        | Cochliobolus victoriae v1.0                            | NCBI   | JGI                  |

| No                     | Systematic Name                     | Common Name         | Genome Version                 | Source | Submitter                    |
|------------------------|-------------------------------------|---------------------|--------------------------------|--------|------------------------------|
| 422                    | <i>Bipolaris zeicola</i>            | -                   | Cochliobolus carbonum v1.0     | NCBI   | JGI                          |
| 423                    | <i>Pyrenophora teres</i>            | Necrotrophic fungus | PTT_W1-1                       | NCBI   | CURTIN UNIVERSITY            |
| 424                    | <i>Pyrenophora tritici-repentis</i> | -                   | ASM14998v1                     | NCBI   | Broad                        |
| 425                    | <i>Setosphaeria turcica</i>         | -                   | Setosphaeria trucea Et28A v1.0 | NCBI   | JGI                          |
| <b>Venturiales</b>     |                                     |                     |                                |        |                              |
| 426                    | <i>Verruconis gallopava</i>         | -                   | O_gall_CBS43764                | NCBI   | Broad                        |
| <b>EUROTIOMYCETES</b>  |                                     |                     |                                |        |                              |
| <b>Chaetothyriales</b> |                                     |                     |                                |        |                              |
| 427                    | <i>Cyphellophora europaea</i>       | -                   | Phia_euro_CBS_101466_V1        | NCBI   | Broad                        |
| 428                    | <i>Capronia coronata</i>            | Black yeast         | Capr_coro_CB_617_96_V1         | NCBI   | Broad                        |
| 429                    | <i>Capronia epimyces</i>            | -                   | Capr_epim_CBS_606_96_V1        | NCBI   | Broad                        |
| 430                    | <i>Cladophialophora bantiana</i>    | Dematiaceous fungus | Clad_bant_CBS_173_52_V1        | NCBI   | Broad                        |
| 431                    | <i>Cladophialophora carrionii</i>   | Melanized fungus    | Clad_carr_CBS_160_54_V1        | NCBI   | Broad                        |
| 432                    | <i>Cladophialophora immunda</i>     | -                   | Clad_immu_CBS83496_V1          | NCBI   | Broad                        |
| 433                    | <i>Cladophialophora psammophila</i> | -                   | Clad_psam_CBS_110553_V1        | NCBI   | Broad                        |
| 434                    | <i>Cladophialophora yegresii</i>    | -                   | Clad_yegr_CBS_114405_V1        | NCBI   | Broad                        |
| 435                    | <i>Exophiala aquamarina</i>         | -                   | Exop_aqua_CBS_119918_V1        | NCBI   | Broad                        |
| 436                    | <i>Exophiala dermatitidis</i>       | -                   | Exop_derm_V1                   | NCBI   | Broad                        |
| 437                    | <i>Exophiala mesophila</i>          | -                   | Exop_meso_CBS40295_V1          | NCBI   | Broad                        |
| 438                    | <i>Exophiala oligosperma</i>        | -                   | Exop_olig_CBS72588_V1          | NCBI   | Broad                        |
| 439                    | <i>Exophiala spinifera</i>          | -                   | Exop_spin_CBS89968_V1          | NCBI   | Broad                        |
| 440                    | <i>Exophiala xenobiotica</i>        | -                   | Exop_xeno_CBS118157_V1         | NCBI   | Broad                        |
| 441                    | <i>Fonsecaea erecta</i>             | -                   | ASM165198v1                    | NCBI   | Federal University of Parana |

| No                | Systematic Name                  | Common Name             | Genome Version          | Source | Submitter                           |
|-------------------|----------------------------------|-------------------------|-------------------------|--------|-------------------------------------|
| 442               | <i>Fonsecaea monophora</i>       | -                       | ASM164247v1             | NCBI   | Federal University of Parana        |
| 443               | <i>Fonsecaea multimorphosa</i>   | -                       | Fons_mult_CBS_102226_V1 | NCBI   | Broad                               |
| 444               | <i>Fonsecaea nubica</i>          | -                       | ASM164696v1             | NCBI   | Federal University of Parana        |
| 445               | <i>Fonsecaea pedrosoi</i>        | -                       | Fons_pedr_CBS_271_37_V1 | NCBI   | Submitter                           |
| 446               | <i>Phialophora attae</i>         | Black yeast             | ASM129925v1             | NCBI   | CBS-KNAW Fungal Biodiversity Centre |
| 447               | <i>Rhinochadiella mackenziei</i> | -                       | Rhin_mack_CBS_650_93_V1 | NCBI   | Broad                               |
| <b>Eurotiales</b> |                                  |                         |                         |        |                                     |
| 448               | <i>Aspergillus aculeatus</i>     | -                       | Aspac1                  | NCBI   | JGI                                 |
| 449               | <i>Aspergillus bombycis</i>      | -                       | ASM179269v1             | NCBI   | USDA-ARS-SRRC                       |
| 450               | <i>Aspergillus clavatus</i>      | -                       | ASM271v1                | NCBI   | J. Craig Venter Institute           |
| 451               | <i>Aspergillus fischeri</i>      | -                       | ASM14964v1              | NCBI   | TIGR                                |
| 452               | <i>Aspergillus flavus</i>        | -                       | JCVI-af11-v2.0          | NCBI   | J. Craig Venter Institute           |
| 453               | <i>Aspergillus fumigatus</i>     | -                       | ASM265v1                | NCBI   | J. Craig Venter Institute           |
| 454               | <i>Aspergillus glaucus</i>       | -                       | Aspgl1                  | NCBI   | DOE JGI                             |
| 455               | <i>Aspergillus nidulans</i>      | -                       | ASM14920v2              | NCBI   | Broad                               |
| 456               | <i>Aspergillus niger</i>         | -                       | ASM285v2                | NCBI   | DSM, The Netherlands                |
| 457               | <i>Aspergillus nomius</i>        | -                       | ASM120477v1             | NCBI   | USDA-ARS-SRRC                       |
| 458               | <i>Aspergillus oryzae</i>        | -                       | ASM18445v3              | NCBI   | NITE                                |
| 459               | <i>Aspergillus terreus</i>       | Mold fungus             | ASM14961v1              | NCBI   | Broad                               |
| 460               | <i>Penicillium zonata</i>        | -                       | Aspz01                  | NCBI   | DOE JGI                             |
| 461               | <i>Penicillium arizonense</i>    | -                       | ASM177332v1             | NCBI   | Chalmers University of Technology   |
| 462               | <i>Penicillium chrysogenum</i>   | -                       | ASM71027v1              | NCBI   | Ruhr-Universität Bochum             |
| 463               | <i>Penicillium digitatum</i>     | -                       | PdigPd1_v1              | NCBI   | CRG                                 |
| 464               | <i>Penicillium expansum</i>      | Psychrophilic blue mold | ASM76974v1              | NCBI   | CRG                                 |
| 465               | <i>Penicillium marneffei</i>     | -                       | JCVI-PMFA1-2.0          | NCBI   | J. Craig Venter Institute           |

| No                        | Systematic Name                      | Common Name      | Genome Version                   | Source | Submitter                                |
|---------------------------|--------------------------------------|------------------|----------------------------------|--------|------------------------------------------|
| 466                       | <i>Rasamsonia emersonii</i>          | -                | ASM96859v1                       | NCBI   | DSM Bio-based Products & Services B.V.   |
| 467                       | <i>Talaromyces atroroseus</i>        | -                | ASM190759v1                      | NCBI   | Technical University of Denmark          |
| 468                       | <i>Talaromyces stipitatus</i>        | -                | JCVI-TSTA1-3.0                   | NCBI   | J. Craig Venter Institute                |
| <b>Onygenales</b>         |                                      |                  |                                  |        |                                          |
| 469                       | <i>Ajellomyces dermatitidis</i>      | -                | BD_ER3_V1                        | NCBI   | Broad                                    |
| 470                       | <i>Arthroderma otae</i>              | -                | ASM15114v1                       | NCBI   | Broad                                    |
| 471                       | <i>Coccidioides immitis</i>          | -                | ASM14933v2                       | NCBI   | Broad                                    |
| 472                       | <i>Coccidioides posadasii</i>        | -                | JCVI-cpa1-1.0                    | NCBI   | TIGR                                     |
| 473                       | <i>Histoplasma capsulatum</i>        | -                | ASM14958v1                       | NCBI   | Broad                                    |
| 474                       | <i>Nannizzia gypsea</i>              | -                | MS_CBS118893                     | NCBI   | Broad                                    |
| 475                       | <i>Paracoccidioides brasiliensis</i> | Dimorphic fungus | Paracocci_br_Pb18_ V2            | NCBI   | Broad                                    |
| 476                       | <i>Paracoccidioides lutzii</i>       | -                | Paracocci_br_Pb01_ V2            | NCBI   | Broad                                    |
| 477                       | <i>Trichophyton benhamiae</i>        | -                | ASM15112v2                       | NCBI   | Arthroderma Genome Sequencing Consortium |
| 478                       | <i>Trichophyton rubrum</i>           | -                | ASM15142v1                       | NCBI   | Broad                                    |
| 479                       | <i>Trichophyton verrucosum</i>       | -                | ASM15150v1                       | NCBI   | Arthroderma Genome Sequencing Consortium |
| 480                       | <i>Uncinocarpus reesii</i>           | -                | ASM351v2                         | NCBI   | Broad                                    |
| <b>Verrucariales</b>      |                                      |                  |                                  |        |                                          |
| 481                       | <i>Endocarpon pusillum</i>           | -                | EPUS                             | NCBI   | Chinese Academy of Sciences              |
| <b>EXOBASIDIOMYCETES</b>  |                                      |                  |                                  |        |                                          |
| <b>Georgefischeriales</b> |                                      |                  |                                  |        |                                          |
| 482                       | <i>Tilletiaria anomala</i>           | -                | Tilletiaria anomala UBC 951 v1.0 | NCBI   | DOE JGI                                  |
| <b>LEOTIOMYCETES</b>      |                                      |                  |                                  |        |                                          |
| <b>Helotiales</b>         |                                      |                  |                                  |        |                                          |
| 483                       | <i>Botryotinia fuckeliana</i>        | Gray mold fungus | ASM14353v4                       | NCBI   | Syngenta Biotechnology, Inc.             |
| 484                       | <i>Glarea lozoyensis</i>             | -                | GLAREA                           | NCBI   | Chinese Academy of Sciences              |



| No                                | Systematic Name                     | Common Name        | Genome Version        | Source | Submitter                                  |
|-----------------------------------|-------------------------------------|--------------------|-----------------------|--------|--------------------------------------------|
| 485                               | <i>Marssonina brunnea</i>           | -                  | ASM29877v1            | NCBI   | Nanjing Forestry University                |
| 486                               | <i>Phialocephala scopiformis</i>    | -                  | Phisc1                | NCBI   | DOE JGI                                    |
| 487                               | <i>Sclerotinia sclerotiorum</i>     | White mold fungus  | ASM14694v2            | NCBI   | Broad                                      |
| <b>Leotiomyces incertae sedis</b> |                                     |                    |                       |        |                                            |
| 488                               | <i>Pseudogymnoascus destructans</i> | Cold-loving fungus | ASM164126v1           | NCBI   | US Forest Service                          |
| 489                               | <i>Pseudogymnoascus verrucosus</i>  | -                  | ASM166265v1           | NCBI   | US Forest Service                          |
| <b>MALASSEZIOMYCETES</b>          |                                     |                    |                       |        |                                            |
| <b>Malasseziales</b>              |                                     |                    |                       |        |                                            |
| 490                               | <i>Malassezia globosa</i>           | -                  | ASM18169v1            | NCBI   | The Procter & Gamble Company               |
| 491                               | <i>Malassezia pachydermatis</i>     | -                  | MalaPachy             | NCBI   | University of Utrecht                      |
| 492                               | <i>Malassezia sympodialis</i>       | -                  | ASM34930v2            | NCBI   | SciLifeLab                                 |
| <b>MICROBOTRYOMYCETES</b>         |                                     |                    |                       |        |                                            |
| <b>Sporidiobolales</b>            |                                     |                    |                       |        |                                            |
| 493                               | <i>Rhodotorula graminis</i>         | Pigmented yeast    | Rhoba1.1              | NCBI   | DOE JGI                                    |
| 494                               | <i>Rhodotorula toruloides</i>       | -                  | RHOziaDV1.0           | NCBI   | Dalian Institute of Chemical Physics       |
| <b>MIXIOMYCETES</b>               |                                     |                    |                       |        |                                            |
| <b>Mixiales</b>                   |                                     |                    |                       |        |                                            |
| 495                               | <i>Mixia osmundae</i>               | -                  | Mixia osmundae v1.0   | NCBI   | DOE JGI                                    |
| <b>ORBILIOMYCETES</b>             |                                     |                    |                       |        |                                            |
| <b>Orbiliales</b>                 |                                     |                    |                       |        |                                            |
| 496                               | <i>Arthrotrrys oligospora</i>       | -                  | AOL24927 1.0          | NCBI   | P. R. China                                |
| 497                               | <i>Dactylellina haptotyla</i>       | -                  | MHA_v2                | NCBI   | Lund University                            |
| <b>PEZIZOMYCETES</b>              |                                     |                    |                       |        |                                            |
| <b>Pezizales</b>                  |                                     |                    |                       |        |                                            |
| 498                               | <i>Tuber melanosporum</i>           | Black truffle      | ASM15164v1            | NCBI   | The French-Italian Tuber Genome Consortium |
| <b>PNEUMOCYSTIDOMYCETES</b>       |                                     |                    |                       |        |                                            |
| <b>Pneumocystidales</b>           |                                     |                    |                       |        |                                            |
| 499                               | <i>Pneumocystis carinii</i>         | Yeast-like fungus  | Pneu_cari_B80_V3      | NCBI   | Broad                                      |
| 500                               | <i>Pneumocystis jirovecii</i>       | -                  | Pneu_jiro_RU7_V2      | NCBI   | Broad                                      |
| 501                               | <i>Pneumocystis murina</i>          | -                  | Pneumo_murina_B123_V4 | NCBI   | Broad                                      |
| <b>PUCCINIOMYCETES</b>            |                                     |                    |                       |        |                                            |

| No                       | Systematic Name                   | Common Name             | Genome Version      | Source | Submitter                                         |
|--------------------------|-----------------------------------|-------------------------|---------------------|--------|---------------------------------------------------|
| <b>Pucciniales</b>       |                                   |                         |                     |        |                                                   |
| 502                      | <i>Melampsora larici-populina</i> | Poplar leaf rust fungus | v1.0                | NCBI   | JGI-PGF                                           |
| 503                      | <i>Puccinia graminis</i>          | Wheat stem rust fungus  | ASM14992v1          | NCBI   | Broad                                             |
| <b>SACCHAROMYCETES</b>   |                                   |                         |                     |        |                                                   |
| <b>Saccharomycetales</b> |                                   |                         |                     |        |                                                   |
| 504                      | <i>Candida albicans</i>           | Yeast                   | ASM18296v3          | NCBI   | Stanford University                               |
| 505                      | <i>Candida auris</i>              | -                       | ASM118947v1         | NCBI   | Indian Institute of Science                       |
| 506                      | <i>Candida dubliniensis</i>       | -                       | ASM2694v1           | NCBI   | Wellcome                                          |
| 507                      | <i>Candida glabrata</i>           | -                       | ASM254v2            | NCBI   | Genolevures Consortium                            |
| 508                      | <i>Candida orthopsilosis</i>      | -                       | ASM31587v1          | NCBI   | Trinity College Dublin                            |
| 509                      | <i>Candida tanzawaensis</i>       | -                       | Canta1              | NCBI   | Submitter                                         |
| 510                      | <i>Candida tenuis</i>             | -                       | Candida tenuis v1.0 | NCBI   | DOE JGI                                           |
| 511                      | <i>Candida tropicalis</i>         | -                       | ASM633v2            | NCBI   | Broad                                             |
| 512                      | <i>Lodderomyces elongisporus</i>  | -                       | ASM14968v1          | NCBI   | Broad                                             |
| 513                      | <i>Ascoidea rubescens</i>         | -                       | Asclu1              | NCBI   | DOE JGI                                           |
| 514                      | <i>Babjeviella inositolovora</i>  | -                       | Babin1              | NCBI   | DOE JGI                                           |
| 515                      | <i>Clavispora lusitaniae</i>      | -                       | ASM383v1            | NCBI   | Broad                                             |
| 516                      | <i>Cyberlindnera jadinii</i>      | -                       | Cybja1              | NCBI   | DOE JGI                                           |
| 517                      | <i>Debaryomyces fabryi</i>        | -                       | debFab1.0           | NCBI   | University of Natural Resources and Life Sciences |
| 518                      | <i>Debaryomyces hansenii</i>      | -                       | ASM644v2            | NCBI   | Genolevures Consortium                            |
| 519                      | <i>Eremothecium cymbalariae</i>   | -                       | ASM23536v1          | NCBI   | Carlsberg Laboratory                              |
| 520                      | <i>Eremothecium gossypii</i>      | -                       | ASM9102v4           | NCBI   | Biozentrum                                        |
| 521                      | <i>Eremothecium sinecaudum</i>    | -                       | ASM154855v1         | NCBI   | Duke University                                   |
| 522                      | <i>Hyphopichia burtonii</i>       | -                       | Hypbu1              | NCBI   | DOE JGI                                           |
| 523                      | <i>Kazachstania africana</i>      | -                       | Ka_CBS2517          | NCBI   | Wolfe Laboratory                                  |
| 524                      | <i>Kazachstania naganishii</i>    | -                       | ASM34898v1          | NCBI   | Wolfe Laboratory                                  |
| 525                      | <i>Kluyveromyces lactis</i>       | -                       | ASM251v1            | NCBI   | Genolevures Consortium                            |
| 526                      | <i>Kluyveromyces marxianus</i>    | -                       | Kmar_1.0            | NCBI   | Yamaguchi University                              |
| 527                      | <i>Komagataella phaffii</i>       | -                       | ASM2700v1           | NCBI   | VIB                                               |
| 528                      | <i>Kuraishia capsulata</i>        | -                       | AUH.PRJEB4427_v1    | NCBI   | Genoscope CEA                                     |

| No  | Systematic Name                   | Common Name | Genome Version                | Source | Submitter                                         |
|-----|-----------------------------------|-------------|-------------------------------|--------|---------------------------------------------------|
| 529 | <i>Lachancea lanzarotensis</i>    | -           | LALAO                         | NCBI   | INRA UMR 1319                                     |
| 530 | <i>Lachancea thermotolerans</i>   | -           | ASM14280v1                    | NCBI   | Genolevures Consortium                            |
| 531 | <i>Metschnikowia bicuspidata</i>  | -           | Metbi1                        | NCBI   | DOE JGI                                           |
| 532 | <i>Meyerozyma guilliermondii</i>  | -           | ASM14942v1                    | NCBI   | Broad                                             |
| 533 | <i>Naumovozya castellii</i>       | -           | ASM23734v1                    | NCBI   | Trinity College Dublin                            |
| 534 | <i>Naumovozya dairenensis</i>     | -           | ASM22711v2                    | NCBI   | Trinity College Dublin                            |
| 535 | <i>Ogataea parapolyomorpha</i>    | -           | Hansenula_2                   | NCBI   | Centre                                            |
| 536 | <i>Ogataea polymorpha</i>         | -           | Hanpo2                        | NCBI   | JGI-PGF                                           |
| 537 | <i>Saccharomyces cerevisiae</i>   | -           | R64                           | NCBI   | Saccharomyces Genome Database                     |
| 538 | <i>Saccharomyces eubayanus</i>    | -           | SEUB3.0                       | NCBI   | University of Wisconsin-Madison                   |
| 539 | <i>Spathaspora passalidarum</i>   | -           | Spathaspora passalidarum v2.0 | NCBI   | DOE JGI                                           |
| 540 | <i>Sugiyamaella lignohabitans</i> | -           | ASM164002v2                   | NCBI   | University of Natural Resources and Life Sciences |
| 541 | <i>Tetrapisispora blattae</i>     | -           | ASM31591v1                    | NCBI   | Wolfe Laboratory                                  |
| 542 | <i>Tetrapisispora phaffii</i>     | -           | ASM23690v1                    | NCBI   | Wolfe Laboratory                                  |
| 543 | <i>Torulaspora delbrueckii</i>    | -           | ASM24337v1                    | NCBI   | Wolfe Laboratory                                  |
| 544 | <i>Vanderwaltozyma polyspora</i>  | -           | ASM15003v1                    | NCBI   | Trinity College Dublin                            |
| 545 | <i>Yarrowia lipolytica</i>        | -           | ASM252v1                      | NCBI   | Genolevures Consortium                            |
| 546 | <i>Zygosaccharomyces rouxii</i>   | -           | ASM2636v1                     | NCBI   | Genolevures Consortium                            |
| 547 | <i>Wickerhamomyces anomalus</i>   | -           | Wican1                        | NCBI   | JGI-PSF                                           |
| 548 | <i>Wickerhamomyces ciferrii</i>   | -           | ASM31348v1                    | NCBI   | Center for Biotechnology                          |
| 549 | <i>Scheffersomyces stipitis</i>   | -           | ASM20916v1                    | NCBI   | DOE JGI                                           |
| 550 | <i>Pichia kudriavzevii</i>        | -           | ASM198332v1                   | NCBI   | WUR                                               |
| 551 | <i>Pichia membranifaciens</i>     | -           | Picme2                        | NCBI   | JGI-PSF                                           |

| No                             | Systematic Name                       | Common Name | Genome Version                 | Source | Submitter                                    |
|--------------------------------|---------------------------------------|-------------|--------------------------------|--------|----------------------------------------------|
| <b>SCHIZOSACCHAROMYCETES</b>   |                                       |             |                                |        |                                              |
| <b>Schizosaccharomycetales</b> |                                       |             |                                |        |                                              |
| 552                            | <i>Schizosaccharomyces cryophilus</i> | -           | SCY4                           | NCBI   | Broad                                        |
| 553                            | <i>Schizosaccharomyces japonicus</i>  | -           | SJ5                            | NCBI   | Broad                                        |
| 554                            | <i>Schizosaccharomyces octosporus</i> | -           | SO6                            | NCBI   | Broad                                        |
| 555                            | <i>Schizosaccharomyces pombe</i>      | -           | ASM294v2                       | NCBI   | EUPOM                                        |
| <b>SORDARIOMYCETES</b>         |                                       |             |                                |        |                                              |
| <b>Hypocreales</b>             |                                       |             |                                |        |                                              |
| 556                            | <i>Metarhizium acridum</i>            | -           | MetAcr_May2010                 | NCBI   | Metarhizium genome sequencing Consortium     |
| 557                            | <i>Metarhizium brunneum</i>           | -           | MBR_1.0                        | NCBI   | Shanghai Institutes for Biological Sciences  |
| 558                            | <i>Metarhizium majus</i>              | -           | MAJ_1.0                        | NCBI   | Shanghai Institutes for Biological Sciences  |
| 559                            | <i>Metarhizium robertsii</i>          | -           | MAA 2.0                        | NCBI   | Metarhizium genome sequencing Consortium     |
| 560                            | <i>Pochonia chlamydosporia</i>        | -           | ASM165323v2                    | NCBI   | The Institute of Vegetables and Flowers CAAS |
| 561                            | <i>Beauveria bassiana</i>             | -           | ASM28067v1                     | NCBI   | Zhejiang University, China                   |
| 562                            | <i>Cordyceps militaris</i>            | -           | CmilitarisCM01_v01             | NCBI   | SIBS                                         |
| 563                            | <i>Isaria fumosorosea</i>             | -           | ISF 1.0                        | NCBI   | Shanghai Institutes for Biological Sciences  |
| 564                            | <i>Trichoderma atroviride</i>         | -           | TRIAT v2.0                     | NCBI   | DOE JGI                                      |
| 565                            | <i>Trichoderma gamsii</i>             | -           | TGAM01v2                       | NCBI   | University of Pisa                           |
| 566                            | <i>Trichoderma reesei</i>             | -           | v2.0                           | NCBI   | DOE JGI                                      |
| 567                            | <i>Trichoderma virens</i>             | -           | TRIVI v2.0                     | NCBI   | DOE JGI                                      |
| 568                            | <i>Fusarium fujikuroi</i>             | -           | Fusarium_fujikuroi_IMI58289_V2 | NCBI   | HMGU-IBIS                                    |

| No                     | Systematic Name                       | Common Name              | Genome Version            | Source | Submitter                                         |
|------------------------|---------------------------------------|--------------------------|---------------------------|--------|---------------------------------------------------|
| 569                    | <i>Fusarium graminearum</i>           | -                        | ASM24013v3                | NCBI   | International Gibberella zeae Genomics Consortium |
| 570                    | <i>Fusarium oxysporum</i>             | -                        | ASM14995v2                | NCBI   | Broad                                             |
| 571                    | <i>Fusarium pseudograminearum</i>     | Crown rot fungus         | FP7                       | NCBI   | CSIRO                                             |
| 572                    | <i>Fusarium verticillioides</i>       | -                        | ASM14955v1                | NCBI   | Syngenta Biotechnology, Inc.                      |
| 573                    | <i>Nectria haematococca</i>           | -                        | v2.0                      | NCBI   | DOE JGI                                           |
| 574                    | <i>Purpureocillium lilacinum</i>      | -                        | ASM 165326v1              | NCBI   | The Institute of Vegetables and Flowers CAAS      |
| <b>Glomerellales</b>   |                                       |                          |                           |        |                                                   |
| 575                    | <i>Colletotrichum fioriniae</i>       | -                        | ASM293045v1               | NCBI   | VIB                                               |
| 576                    | <i>Colletotrichum gloeosporioides</i> | -                        | ASM290110v1               | NCBI   | Yeungnam University                               |
| 577                    | <i>Colletotrichum graminicola</i>     | -                        | C_graminicola_M1_001_V1   | NCBI   | Broad                                             |
| 578                    | <i>Colletotrichum higginsianum</i>    | -                        | ASM167251v1               | NCBI   | GATC Biotech AG                                   |
| 579                    | <i>Colletotrichum orchidophilum</i>   | -                        | CORC01                    | NCBI   | University of Western Brittany                    |
| 580                    | <i>Verticillium alfalfae</i>          | Verticillium wilt fungus | ASM15082v1                | NCBI   | Broad                                             |
| 581                    | <i>Verticillium dahliae</i>           | -                        | ASM15067v2                | NCBI   | Broad                                             |
| <b>Magnaporthales</b>  |                                       |                          |                           |        |                                                   |
| 582                    | <i>Magnaporthe oryzae</i>             | Rice blast fungus        | MG8                       | NCBI   | International Rice Blast Genome Consortium        |
| 583                    | <i>Gaeumannomyces tritici</i>         | -                        | Gae_graminis_V2           | NCBI   | Broad                                             |
| <b>Microascales</b>    |                                       |                          |                           |        |                                                   |
| 584                    | <i>Scedosporium apiospermum</i>       | Environmental mold       | ScApio1.0                 | NCBI   | LUNAM - Angers University                         |
| <b>Ophiostomatales</b> |                                       |                          |                           |        |                                                   |
| 585                    | <i>Grosmannia clavigera</i>           | -                        | Sanger-454-IlluminaPA_2.0 | NCBI   | The Tria Project                                  |
| 586                    | <i>Sporothrix schenckii</i>           | Dimorphic fungus         | S_schenckii_v1            | NCBI   | LNCC                                              |
| <b>Sordariales</b>     |                                       |                          |                           |        |                                                   |
| 587                    | <i>Chaetomium globosum</i>            | -                        | ASM14336v1                | NCBI   | The Genome Assembly Team                          |

| No                      | Systematic Name                                        | Common Name        | Genome Version        | Source | Submitter                                   |
|-------------------------|--------------------------------------------------------|--------------------|-----------------------|--------|---------------------------------------------|
| 588                     | <i>Chaetomium thermophilum</i>                         | -                  | CTHT_3.0              | NCBI   | EMBL                                        |
| 589                     | <i>Neurospora crassa</i>                               | -                  | NC12                  | NCBI   | Broad                                       |
| 590                     | <i>Neurospora tetrasperma</i>                          | -                  | v2.0                  | NCBI   | JGI-PGF                                     |
| 591                     | <i>Podospora anserina</i>                              | -                  | ASM22654v1            | NCBI   | Genoscope                                   |
| 592                     | <i>Sordaria macrospora</i>                             | -                  | ASM18280v2            | NCBI   | Ruhr University Bochum                      |
| 593                     | <i>Thermothelomyces thermophila</i>                    | -                  | ASM22609v1            | NCBI   | DOE JGI                                     |
| 594                     | <i>Thielavia terrestris</i>                            | -                  | ASM22611v1            | NCBI   | DOE JGI                                     |
| <b>Togniniales</b>      |                                                        |                    |                       |        |                                             |
| 595                     | <i>Phaeoacremonium minimum</i>                         | -                  | UCRPA7V03             | NCBI   | UC Davis                                    |
| <b>Xylariales</b>       |                                                        |                    |                       |        |                                             |
| 596                     | <i>Eutypa lata</i>                                     | -                  | UCREL1V03             | NCBI   | UC Davis                                    |
| 597                     | <i>Pestalotiopsis fici</i>                             | Endophytic fungus  | PFICI                 | NCBI   | Chinese Academy of Sciences                 |
| <b>TREMELLOMYCETES</b>  |                                                        |                    |                       |        |                                             |
| <b>Tremellales</b>      |                                                        |                    |                       |        |                                             |
| 598                     | <i>Cryptococcus amyloletus</i>                         | -                  | Cryp_aml_CBS6039_V3   | NCBI   | Broad                                       |
| 599                     | <i>Cryptococcus gattii</i>                             | -                  | ASM18594v1            | NCBI   | Canada Michael Smith Genome Sciences Centre |
| 600                     | <i>Cryptococcus neoformans var. grubii</i>             | Encapsulated yeast | CNA3                  | NCBI   | Broad                                       |
| 601                     | <i>Cryptococcus neoformans var. neoformans JEC21</i>   | -                  | ASM9104v1             | NCBI   | TIGR                                        |
| 602                     | <i>Cryptococcus neoformans var. neoformans B-3501A</i> | -                  | ASM14938v1            | NCBI   | Stanford University                         |
| 603                     | <i>Kockovaella imperatae</i>                           | -                  | Kocim1                | NCBI   | DOE JGI                                     |
| 604                     | <i>Kwoniella bestiolae</i>                             | -                  | Cryp_best_CBS10118_V1 | NCBI   | Broad                                       |
| 605                     | <i>Kwoniella dejecticola</i>                           | -                  | Cryp_deje_CBS10117_V1 | NCBI   | Broad                                       |
| 606                     | <i>Kwoniella mangroviensis</i>                         | -                  | Kwon_mang_CBS8507_V2  | NCBI   | Broad                                       |
| 607                     | <i>Kwoniella pini</i>                                  | -                  | Cryp_pinu_CBS10737_V1 | NCBI   | Broad                                       |
| 608                     | <i>Tremella mesenterica</i>                            | -                  | Tremel1               | NCBI   | DOE JGI                                     |
| 609                     | <i>Tsuchiyaea wingfieldii</i>                          | -                  | Tsuc_wing_CBS7118_V1  | NCBI   | Broad                                       |
| <b>Trichosporonales</b> |                                                        |                    |                       |        |                                             |

| No                                     | Systematic Name                        | Common Name        | Genome Version                    | Source | Submitter                                                        |
|----------------------------------------|----------------------------------------|--------------------|-----------------------------------|--------|------------------------------------------------------------------|
| 610                                    | <i>Cutaneotrichosporon oleaginosus</i> | -                  | Triol1                            | NCBI   | DOE JGI                                                          |
| 611                                    | <i>Trichosporon asahii</i>             | -                  | Trichosporon asahii 1             | NCBI   | Beijing Military Command General Hospital of PLA                 |
| <b>USTILAGINOMYCETES</b>               |                                        |                    |                                   |        |                                                                  |
| <b>Ustilaginales</b>                   |                                        |                    |                                   |        |                                                                  |
| 612                                    | <i>Anthracozytis flocculosa</i>        | -                  | Pfloc1.0                          | NCBI   | Universite Laval                                                 |
| 613                                    | <i>Kalmanozyma brasiliensis</i>        | -                  | PSEUBRA1                          | NCBI   | Laboratorio Nacional de Ciencia e Tecnologia do Bioetanol        |
| 614                                    | <i>Moesziomyces antarcticus</i>        | -                  | ASM74776v1                        | NCBI   | National Institute of Advanced Industrial Science and Technology |
| 615                                    | <i>Pseudozyma hubeiensis</i>           | -                  | ASM40351v1                        | NCBI   | Kitami Institute of Technology                                   |
| 616                                    | <i>Ustilago maydis</i>                 | Common smut fungus | Umaydis521.2.0                    | NCBI   | Broad                                                            |
| <b>WALLEMIOMYCETES</b>                 |                                        |                    |                                   |        |                                                                  |
| <b>Wallemiales</b>                     |                                        |                    |                                   |        |                                                                  |
| 617                                    | <i>Wallemia ichthyophaga</i>           | -                  | Wallemia ichthyophaga version 1.0 | NCBI   | BGI                                                              |
| 618                                    | <i>Wallemia mellicola</i>              | -                  | Wallemia sebi v1.0                | NCBI   | JGI                                                              |
| <b>XYLONOMYCETES</b>                   |                                        |                    |                                   |        |                                                                  |
| <b>Xylonales</b>                       |                                        |                    |                                   |        |                                                                  |
| 619                                    | <i>Xylona heveae</i>                   | Rubber tree fungus | Xylona heveae TC161 v1.0          | NCBI   | DOE JGI                                                          |
| <b>TAPHRINOMYCOTINA INCERTAE SEDIS</b> |                                        |                    |                                   |        |                                                                  |
| <b>Taphrinomycotina</b>                |                                        |                    |                                   |        |                                                                  |
| 620                                    | <i>Saitoella complicata</i>            | -                  | Saico1                            | NCBI   | JGI-PSF                                                          |
| <b>FUNGI INCERTAE SEDIS</b>            |                                        |                    |                                   |        |                                                                  |
| <b>Mortierellales</b>                  |                                        |                    |                                   |        |                                                                  |
| 621                                    | <i>Lobosporangium transversale</i>     | -                  | Lobtra1                           | NCBI   | DOE JGI                                                          |
| <b>Mucorales</b>                       |                                        |                    |                                   |        |                                                                  |
| 622                                    | <i>Phycomyces blakesleeanus</i>        | -                  | Phybl2                            | NCBI   | JGI-PSF                                                          |
| 623                                    | <i>Rhizopus microsporus</i>            | Soil fungus        | Rhimi1.1                          | NCBI   | DOE JGI                                                          |
| <b>Microsporidia</b>                   |                                        |                    |                                   |        |                                                                  |

| No                       | Systematic Name                         | Common Name                | Genome Version                   | Source | Submitter                                    |
|--------------------------|-----------------------------------------|----------------------------|----------------------------------|--------|----------------------------------------------|
| 624                      | <i>Encephalitozoon cuniculi</i>         | Rabbit fungus              | ASM9122v1                        | NCBI   | Genoscope                                    |
| 625                      | <i>Encephalitozoon hellem</i>           | -                          | ASM27781v3                       | NCBI   | University of British Columbia               |
| 626                      | <i>Encephalitozoon intestinalis</i>     | -                          | ASM14646v1                       | NCBI   | University of British Columbia               |
| 627                      | <i>Encephalitozoon romaleae</i>         | -                          | ASM28003v2                       | NCBI   | University of Ottawa                         |
| 628                      | <i>Enterocytozoon bieneusi</i>          | -                          | ASM20948v1                       | NCBI   | Tufts Cummings School of Veterinary Medicine |
| 629                      | <i>Mitosporidium daphniae</i>           | -                          | UGP1.0                           | NCBI   | Illinois Institute of Technology             |
| 630                      | <i>Nematocida parisii</i>               | Nematode-killer from Paris | Nema_parisii_ERTm1_V3            | NCBI   | Broad                                        |
| 631                      | <i>Nosema ceranae</i>                   | Microsporidian             | ASM98816v1                       | NCBI   | University of Ottawa                         |
| 632                      | <i>Ordospora colligata</i>              | -                          | ASM80326v1                       | NCBI   | University of British Columbia               |
| 633                      | <i>Vavraia culicis</i>                  | Spore-forming parasite     | Vavr_culi_floridensis_V1         | NCBI   | Broad                                        |
| 634                      | <i>Vittaforma corneae</i>               | -                          | Vitt_corn_V1                     | NCBI   | Broad                                        |
| <b>VIRIDIPLANTAE</b>     |                                         |                            |                                  |        |                                              |
| <b>Mamiellales</b>       |                                         |                            |                                  |        |                                              |
| 635                      | <i>Micromonas pusilla</i> CCMP1545      | -                          | Micromonas pusilla CCMP1545 v2.0 | NCBI   | Micromonas Genome Consortium                 |
| 636                      | <i>Micromonas</i> sp. RCC299            | -                          | ASM9098v2                        | NCBI   | Micromonas Genome Consortium                 |
| 637                      | <i>Ostreococcus lucimarinus</i> CCE9901 | -                          | ASM9206v1                        | NCBI   | JGI                                          |
| 638                      | <i>Ostreococcus tauri</i>               | -                          | version 050606                   | NCBI   | Laboratoire Arago, France                    |
| <b>Chlamydomonadales</b> |                                         |                            |                                  |        |                                              |
| 639                      | <i>Chlamydomonas reinhardtii</i>        | -                          | v3.0                             | NCBI   | JGI                                          |
| <b>Volvocales</b>        |                                         |                            |                                  |        |                                              |
| 640                      | <i>Volvox carteri</i> f. nagariensis    | -                          | v1.0                             | NCBI   | JGI                                          |
| <b>Chlorellales</b>      |                                         |                            |                                  |        |                                              |
| 641                      | <i>Chlorella variabilis</i>             | -                          | v 1.0                            | NCBI   | JGI                                          |



| No                     | Systematic Name                          | Common Name       | Genome Version                | Source | Submitter                           |
|------------------------|------------------------------------------|-------------------|-------------------------------|--------|-------------------------------------|
| 642                    | <i>Auxenochlorella protothecoides</i>    | Green microalga   | ASM73321v1                    | NCBI   | BGI                                 |
| 643                    | <i>Helicosporidium sp. ATCC 50920</i>    | -                 | Helico_v1.0                   | NCBI   | University of British Columbia      |
| <b>Chlorococcales</b>  |                                          |                   |                               |        |                                     |
| 644                    | <i>Coccomyxa subellipsoidea C-169</i>    | -                 | Coccomyxa subellipsoidae v2.0 | NCBI   | JGI                                 |
| <b>Klebsormidiales</b> |                                          |                   |                               |        |                                     |
| 645                    | <i>Klebsormidium flaccidum</i>           | -                 | ASM70883v1                    | NCBI   | TokyoTech                           |
| <b>Funariales</b>      |                                          |                   |                               |        |                                     |
| 646                    | <i>Physcomitrella patens</i>             | -                 | V1.1                          | NCBI   | Moss Genome Consortium              |
| <b>Selaginellales</b>  |                                          |                   |                               |        |                                     |
| 647                    | <i>Selaginella moellendorffii</i>        | Spikemoss         | v1.0                          | NCBI   | Selaginella Consortium              |
| <b>Pinales</b>         |                                          |                   |                               |        |                                     |
| 648                    | <i>Pinus taeda</i>                       | Loblolly pine     | PtaedaFosmidLib.0.8           | NCBI   | UC Davis                            |
| <b>Amborellales</b>    |                                          |                   |                               |        |                                     |
| 649                    | <i>Amborella trichopoda</i>              | Amborellaceae     | AMTR1.0                       | NCBI   | Amborella Genome Sequencing Project |
| <b>Alismatales</b>     |                                          |                   |                               |        |                                     |
| 650                    | <i>Spirodela polyrhiza</i>               | Greater duckweed  | Spirodela_polyrhiza_v01       | NCBI   | Waksman Institute                   |
| <b>Arecales</b>        |                                          |                   |                               |        |                                     |
| 651                    | <i>Phoenix dactylifera</i>               | Date palm         | DPV01                         | NCBI   | Joint Center for Genomics Research  |
| 652                    | <i>Elaeis oleifera</i>                   | American oil palm | EO8                           | NCBI   | Orion Genomics                      |
| <b>Zingiberales</b>    |                                          |                   |                               |        |                                     |
| 653                    | <i>Ensete ventricosum</i>                | Ethiopian banana  | v1.1                          | NCBI   | University of Exeter                |
| 654                    | <i>Musa acuminata subsp. malaccensis</i> | -                 | ASM31385v1                    | NCBI   | Genoscope/IG/CEA                    |
| <b>Poales</b>          |                                          |                   |                               |        |                                     |
| 655                    | <i>Sorghum bicolor</i>                   | Sorghum           | Sorbi1                        | NCBI   | Sorghum Consortium                  |
| 656                    | <i>Zea mays</i>                          | Maize             | B73 RefGen_v3                 | NCBI   | Maize Genome Sequencing Project     |
| 657                    | <i>Setaria italica</i>                   | Foxtail millet    | Setaria V1                    | NCBI   | JGI                                 |

| No               | Systematic Name                       | Common Name          | Genome Version            | Source | Submitter                                                    |
|------------------|---------------------------------------|----------------------|---------------------------|--------|--------------------------------------------------------------|
| 658              | <i>Brachypodium distachyon</i>        | Purple false brome   | v1.0                      | NCBI   | JGI and The International Brachypodium Initiative            |
| 659              | <i>Leersia perrieri</i>               | -                    | Lperr_V1.4                | NCBI   | Arizona Genomics Institute                                   |
| 660              | <i>Oryza barthii</i>                  | Rice                 | O.barthii_v1.3            | NCBI   | Oryza Chr3 Short Arm Comparative Sequencing Project          |
| 661              | <i>Oryza brachyantha</i>              | -                    | Oryza_brachyantha_v1.4b   | NCBI   | The Institute of Genetics and Developmental Biology          |
| 662              | <i>Oryza glumipatula</i>              | -                    | Oryza_glumipatula_v1.5    | NCBI   | OMAP                                                         |
| 663              | <i>Oryza longistaminata</i>           | -                    | O_longistaminata_v1.0     | NCBI   | BGI                                                          |
| 664              | <i>Oryza meridionalis</i>             | -                    | Oryza_meridionalis_v1.3   | NCBI   | OMAP                                                         |
| 665              | <i>Oryza nivara</i>                   | -                    | Oryza_nivara_v1.0         | NCBI   | OMAP                                                         |
| 666              | <i>Oryza punctata</i>                 | -                    | Oryza_punctata_v1.2       | NCBI   | OMAP                                                         |
| 667              | <i>Oryza sativa Japonica Group</i>    | -                    | Build 4.0                 | NCBI   | International Rice Genome Sequencing Project                 |
| 668              | <i>Zizania latifolia</i>              | Manchurian wild rice | Zizania_latifolia_v01     | NCBI   | Zhejiang University                                          |
| 669              | <i>Aegilops tauschii</i>              | Tausch's goatgrass   | ASM34733v1                | NCBI   | BGI                                                          |
| 670              | <i>Triticum urartu</i>                | Wild einkorn         | ASM34745v1                | NCBI   | BGI                                                          |
| <b>Proteales</b> |                                       |                      |                           |        |                                                              |
| 671              | <i>Nelumbo nucifera</i>               | Sacred lotus         | Chinese Lotus 1.1         | NCBI   | UIUC                                                         |
| <b>Fabales</b>   |                                       |                      |                           |        |                                                              |
| 672              | <i>Lupinus angustifolius</i>          | Blue lupin           | Lupin genome scaffold     | NCBI   | Department of Agriculture and Food, WA government, Australia |
| 673              | <i>Phaseolus vulgaris</i>             | Common bean          | PhaVulg1_0                | NCBI   | JGI                                                          |
| 674              | <i>Cajanus cajan</i>                  | Pigeon pea           | Cajanus_cajan_Asha_ver1.0 | NCBI   | AKI-PGI                                                      |
| 675              | <i>Vigna angularis var. angularis</i> | Adzuki bean          | Vigna angularis           | NCBI   | SNU                                                          |
| 676              | <i>Vigna radiata var. radiata</i>     | -                    | Vradiata_ver6             | NCBI   | SNU                                                          |
| 677              | <i>Glycine max</i>                    | Soybean              | V1.1                      | NCBI   | JGI                                                          |

| No                  | Systematic Name                    | Common Name           | Genome Version   | Source | Submitter                                             |
|---------------------|------------------------------------|-----------------------|------------------|--------|-------------------------------------------------------|
| 678                 | <i>Glycine soja</i>                | -                     | W05v1.0          | NCBI   | CUHK                                                  |
| 679                 | <i>Cicer arietinum</i>             | Chickpea              | ASM33114v1       | NCBI   | BGI                                                   |
| 680                 | <i>Medicago truncatula</i>         | Barrel clover         | MedtrA17.3.5     | NCBI   | International Medicago Genome Annotation Group        |
| 681                 | <i>Trifolium pratense</i>          | Red clover            | Tp1.0            | NCBI   | Masaryk University                                    |
| 682                 | <i>Lotus japonicus</i>             | Birdsfoot trefoil     | ASM18111v1       | NCBI   | KDRI                                                  |
| <b>Rosales</b>      |                                    |                       |                  |        |                                                       |
| 683                 | <i>Malus x domestica</i>           | Apple                 | MalDomGD1.0      | NCBI   | IASMA research center                                 |
| 684                 | <i>Pyrus x bretschneideri</i>      | Chinese white pear    | Pbr_v1.0         | NCBI   | Nanjing Agricultural University                       |
| 685                 | <i>Prunus mume</i>                 | Japanese apricot      | P.mume_V1.0      | NCBI   | BGI                                                   |
| 686                 | <i>Prunus persica</i>              | Peach                 | Prupe1.0         | NCBI   | JGI                                                   |
| 687                 | <i>Fragaria iinumae</i>            | Japanese strawberry   | FII_r1.1         | NCBI   | KDRI                                                  |
| 688                 | <i>Fragaria nubicola</i>           | Himalayan strawberry  | FNU_r1.1         | NCBI   | KDRI                                                  |
| 689                 | <i>Fragaria orientalis</i>         | Wild asian strawberry | FOR_r1.1         | NCBI   | KDRI                                                  |
| 690                 | <i>Fragaria vesca subsp. vesca</i> | Woodland strawberry   | FraVesHawaii_1.0 | NCBI   | Virginia Bioinformatics Institute                     |
| 691                 | <i>Fragaria x ananassa</i>         | Garden strawberry     | FANhybrid_r1.2   | NCBI   | KDRI                                                  |
| 692                 | <i>Morus notabilis</i>             | Mulberry tree         | ASM41409v2       | NCBI   | BGI                                                   |
| 693                 | <i>Cannabis sativa</i>             | Cannabis              | canSat3          | NCBI   | University of Toronto                                 |
| <b>Fagales</b>      |                                    |                       |                  |        |                                                       |
| 694                 | <i>Castanea mollissima</i>         | Chinese chestnut      | ASM76360v1       | NCBI   | Clemson University Genomics Institute                 |
| 695                 | <i>Betula nana</i>                 | Dwarf birch           | ASM32700v1       | NCBI   | QMUL                                                  |
| <b>Cucurbitales</b> |                                    |                       |                  |        |                                                       |
| 696                 | <i>Cucumis melo</i>                | Muskmelon             | ASM31304v1       | NCBI   | Genetica Molecular, Centre de Recerca en Agrigenomica |
| 697                 | <i>Cucumis sativus</i>             | Cucumber              | CucSat_1.0       | NCBI   | The Cucumber Genome Initiative                        |

| No                  | Systematic Name                                         | Common Name      | Genome Version | Source | Submitter                                                                                                 |
|---------------------|---------------------------------------------------------|------------------|----------------|--------|-----------------------------------------------------------------------------------------------------------|
| 698                 | <i>Citrullus lanatus</i>                                | Watermelon       | CiLa_1.0       | NCBI   | National Engineering Research Center for Vegetables, Beijing Academy of Agriculture and Forestry Sciences |
| 699                 | <i>Lagenaria siceraria</i>                              | Calabash         | Bottle_gourd   | NCBI   | Institute of Vegetables, Zhejiang Academy of Agricultural Sciences                                        |
| <b>Malpighiales</b> |                                                         |                  |                |        |                                                                                                           |
| 700                 | <i>Populus euphratica</i>                               | Desert poplar    | PopEup_1.0     | NCBI   | Lanzhou University                                                                                        |
| 701                 | <i>Populus trichocarpa</i>                              | Black cottonwood | Poptr2_0       | NCBI   | JGI                                                                                                       |
| 702                 | <i>Jatropha curcas</i>                                  | Physic nut       | JatCur_1.0     | NCBI   | Chinese Academy of Sciences                                                                               |
| 703                 | <i>Manihot esculenta</i><br><i>subsp. flabellifolia</i> | -                | MW_v2d         | NCBI   | The Cassava Genome Consortium                                                                             |
| 704                 | <i>Ricinus communis</i>                                 | Castor oil plant | JCVLRCG_1.1    | NCBI   | JCVI                                                                                                      |
| 705                 | <i>Linum usitatissimum</i>                              | Flax             | LinUsi_v1.1    | NCBI   | TUFGEN                                                                                                    |
| <b>Myrtales</b>     |                                                         |                  |                |        |                                                                                                           |
| 706                 | <i>Eucalyptus camaldulensis</i>                         | River red gum    | EUC_r1.0       | NCBI   | KDRI                                                                                                      |
| 707                 | <i>Eucalyptus grandis</i>                               | Rose gum         | Egrandis1_0    | NCBI   | Geneglob                                                                                                  |
| <b>Brassicales</b>  |                                                         |                  |                |        |                                                                                                           |
| 708                 | <i>Carica papaya</i>                                    | Papaya           | Papaya1.0      | NCBI   | The Papaya Genome Sequencing Consortium                                                                   |
| 709                 | <i>Arabidopsis halleri</i><br><i>subsp. gemmifera</i>   | -                | Ahal_1.0       | NCBI   | TokyoTech                                                                                                 |
| 710                 | <i>Arabidopsis lyrata</i><br><i>subsp. lyrata</i>       | -                | v.1.0          | NCBI   | JGI                                                                                                       |
| 711                 | <i>Arabidopsis thaliana</i>                             | -                | TAIR10         | NCBI   | The Arabidopsis Information Resource                                                                      |
| 712                 | <i>Camelina sativa</i>                                  | Camelina         | Cs             | NCBI   | Agriculture & AgriFood Canada                                                                             |
| 713                 | <i>Capsella rubella</i>                                 | Capsella         | Caprub1_0      | NCBI   | JGI                                                                                                       |

| No                    | Systematic Name                                                | Common Name          | Genome Version                   | Source | Submitter                                                   |
|-----------------------|----------------------------------------------------------------|----------------------|----------------------------------|--------|-------------------------------------------------------------|
| 714                   | <i>Brassica napus</i>                                          | Rapeseed             | Brassica_napus_<br>assembly_v1.0 | NCBI   | BGI                                                         |
| 715                   | <i>Brassica oleracea</i> var.<br><i>oleracea</i>               | -                    | BOL                              | NCBI   | CanSeq                                                      |
| 716                   | <i>Brassica rapa</i>                                           | Field mustard        | Brapa_1.0                        | NCBI   | Brassica rapa<br>Genome<br>Sequencing<br>Project,<br>BraGSP |
| 717                   | <i>Raphanus<br/>raphanistrum</i> subsp.<br><i>raphanistrum</i> | -                    | ASM76984v1                       | NCBI   | Michigan State<br>University                                |
| 718                   | <i>Raphanus sativus</i>                                        | Radish               | ASM80110v1                       | NCBI   | Myongji<br>University                                       |
| 719                   | <i>Aethionema arabicum</i>                                     | -                    | VEGLAA_v.1.0                     | NCBI   | McGill                                                      |
| 720                   | <i>Arabis alpina</i>                                           | Alpine rockcress     | A_alpina_V4                      | NCBI   | TRANSNET                                                    |
| 721                   | <i>Eutrema parvulum</i>                                        | -                    | Eutrema_parvulum_<br>v01         | NCBI   | University of<br>Illinois                                   |
| 722                   | <i>Eutrema salsugineum</i>                                     | Saltwater cress      | Eutsalg1_0                       | NCBI   | JGI                                                         |
| 723                   | <i>Sisymbrium irio</i>                                         | London rocket        | VEGLSI_v.1.0                     | NCBI   | McGill                                                      |
| 724                   | <i>Leavenworthia<br/>alabamica</i>                             | Alabama glade cress  | VEGLLA_v.1.0                     | NCBI   | McGill                                                      |
| 725                   | <i>Tarenaya hassleriana</i>                                    | Pink queen           | ASM46358v1                       | NCBI   | BGI                                                         |
| <b>Malvales</b>       |                                                                |                      |                                  |        |                                                             |
| 726                   | <i>Gossypium arboreum</i>                                      | Tree cotton          | Gossypium_arboreum_<br>v1.0      | NCBI   | BGI                                                         |
| 727                   | <i>Gossypium raimondii</i>                                     | New world cotton     | Graimondii2_0                    | NCBI   | JGI                                                         |
| 728                   | <i>Theobroma cacao</i>                                         | Cacao                | Theobroma_cacao_<br>20110822     | NCBI   | Cacao Genome<br>Consortium                                  |
| 729                   | <i>Aquilaria agallochum</i>                                    | -                    | Aquilaria_agallocha_v1           | NCBI   | Academia Sinica                                             |
| <b>Sapindales</b>     |                                                                |                      |                                  |        |                                                             |
| 730                   | <i>Azadirachta indica</i>                                      | Indian lilac         | AzaInd2.0                        | NCBI   | Centre for<br>Cellular and<br>Molecular<br>Platforms        |
| 731                   | <i>Citrus clementine</i>                                       | Clementine           | Citrus_clementina_v1.0           | NCBI   | International<br>Citrus Genome<br>Consortium                |
| 732                   | <i>Citrus sinensis</i>                                         | Orange               | Csi_valencia.1.0                 | NCBI   | China Sweet<br>Orange Genome<br>Project                     |
| <b>Vitales</b>        |                                                                |                      |                                  |        |                                                             |
| 733                   | <i>Vitis vinifera</i>                                          | Common grape<br>vine | 12X                              | NCBI   | International<br>Grape Genome<br>Program                    |
| <b>Caryophyllales</b> |                                                                |                      |                                  |        |                                                             |

| No               | Systematic Name                      | Common Name            | Genome Version | Source | Submitter                                             |
|------------------|--------------------------------------|------------------------|----------------|--------|-------------------------------------------------------|
| 734              | <i>Amaranthus hypochondriacus</i>    | Prince's feather       | AHP 1.0        | NCBI   | Institute of Bioinformatics and Applied Biotechnology |
| 735              | <i>Amaranthus tuberculatus</i>       | Tall waterhemp         | ASM18065v1     | NCBI   | University of Illinois                                |
| 736              | <i>Beta vulgaris subsp. vulgaris</i> | -                      | RefBeet-1.2.1  | NCBI   | Beta vulgaris Resource                                |
| 737              | <i>Spinacia oleracea</i>             | Spinach                | Viroflay-1.0.1 | NCBI   | BeetSeq                                               |
| 738              | <i>Dianthus caryophyllus</i>         | Clove pink             | DCA.r1.0       | NCBI   | KDRI                                                  |
| <b>Ericales</b>  |                                      |                        |                |        |                                                       |
| 739              | <i>Actinidia chinensis</i>           | Kiwi fruit             | Kiwifruit_v1   | NCBI   | Boyce Thompson Institute                              |
| 740              | <i>Vaccinium macrocarpon</i>         | Large cranberry        | ASM77533v1     | NCBI   | Rutgers University                                    |
| 741              | <i>Diospyros lotus</i>               | Caucasian persimmon    | ASM77412v1     | NCBI   | University of California Davis                        |
| 742              | <i>Primula veris</i>                 | Cowslip                | ASM78844v1     | NCBI   | University of Zurich                                  |
| <b>Solanales</b> |                                      |                        |                |        |                                                       |
| 743              | <i>Solanum arcanum</i>               | -                      | Soarc10        | NCBI   | PRI                                                   |
| 744              | <i>Solanum habrochaites</i>          | -                      | Sohab10        | NCBI   | PRI                                                   |
| 745              | <i>Solanum lycopersicum</i>          | Tomato                 | SL2.40         | NCBI   | Solanaceae Genomics Project                           |
| 746              | <i>Solanum melongena</i>             | Eggplant               | SME.r2.5.1     | NCBI   | KDRI                                                  |
| 747              | <i>Solanum pennellii</i>             | -                      | Sopen10        | NCBI   | PRI                                                   |
| 748              | <i>Solanum pimpinellifolium</i>      | Currant tomato         | Sol_pimpi.v1.0 | NCBI   | Sol Genomics Network                                  |
| 749              | <i>Solanum tuberosum</i>             | Potato                 | SolTub_3.0     | NCBI   | Potato Genome Sequencing Consortium                   |
| 750              | <i>Capsicum annuum</i>               | Hot pepper             | PGA.v.1.5      | NCBI   | SNU                                                   |
| 751              | <i>Nicotiana sylvestris</i>          | Woodland tobacco       | Nsyl           | NCBI   | Philip Morris International R&D                       |
| 752              | <i>Nicotiana tomentosiformis</i>     | -                      | Ntom_v01       | NCBI   | Philip Morris International R&D                       |
| <b>Lamiales</b>  |                                      |                        |                |        |                                                       |
| 753              | <i>Fraxinus excelsior</i>            | European ash           | BATG-0.4       | NCBI   | QMUL                                                  |
| 754              | <i>Penstemon centranthifolius</i>    | Scarlet bugler         | ASM73743v1     | NCBI   | Ohio State University                                 |
| 755              | <i>Penstemon grinnellii</i>          | Grinnell's beardtongue | ASM73742v1     | NCBI   | Ohio State University                                 |

| No               | Systematic Name          | Common Name          | Genome Version | Source | Submitter                                                                    |
|------------------|--------------------------|----------------------|----------------|--------|------------------------------------------------------------------------------|
| 756              | <i>Sesamum indicum</i>   | Sesame               | S.indicum_v1.0 | NCBI   | Oil Crops Research Institute of the Chinese Academy of Agricultural Sciences |
| 757              | <i>Genlisea aurea</i>    | Corkscrew plant      | GenAur_1.0     | NCBI   | Lomonosov Moscow State University, Evolutionary Genomics Laboratory          |
| 758              | <i>Mimulus guttatus</i>  | Common monkey-flower | Mimgu1_0       | NCBI   | JGI                                                                          |
| <b>Asterales</b> |                          |                      |                |        |                                                                              |
| 759              | <i>Conyza canadensis</i> | Horseweed            | ASM77593v1     | NCBI   | University of Tennessee                                                      |

## Table S2: L1s in genomic data

Table S2: Shows which genomes contain L1s (559/759) and the number of hits and length distribution of hits. L1 elements were detected with protein based searches using TBLASTN and nucleotide similarity searches using LASTZ. All hits had to satisfy a ‘reciprocal best hit’ check: they were screened with CENSOR against the Repbase library of known repeats, and kept if the best hit was an L1 element (not some other repeat). Overlapping hits were merged to produce a non-redundant set of L1s for each genome. The Notes column highlights unusual observations.

| Species                               | # L1 hits | Length distribution (bp)      | Notes                                                                                                                                                                                                               |
|---------------------------------------|-----------|-------------------------------|---------------------------------------------------------------------------------------------------------------------------------------------------------------------------------------------------------------------|
| <b>METAZOA</b>                        |           |                               |                                                                                                                                                                                                                     |
| <b>MAMMALIA</b>                       |           |                               |                                                                                                                                                                                                                     |
| <i>Tachyglossus aculeatus</i>         | 0         | -                             |                                                                                                                                                                                                                     |
| <i>Ornithorhynchus anatinus</i>       | 0         | -                             | 3 tiny fragments found in platypus while mining for L1s. Checked against a pacbio assembly - found 6 similar fragments, but all are flanked by L2 and L3 5' and 3' elements. More likely to be of the L2/CR1 clade. |
| <i>Monodelphis domestica</i>          | 368300    | min 26, median 396, max 12466 |                                                                                                                                                                                                                     |
| <i>Macropus eugenii</i>               | 120437    | min 29, median 469, max 7787  |                                                                                                                                                                                                                     |
| <i>Sarcophilus harrisii</i>           | 132100    | min 26, median 264, max 8834  |                                                                                                                                                                                                                     |
| <i>Dasypus novemcinctus</i>           | 249548    | min 26, median 503, max 13923 |                                                                                                                                                                                                                     |
| <i>Choloepus hoffmanni</i>            | 166782    | min 35, median 612, max 11920 |                                                                                                                                                                                                                     |
| <i>Chrysochloris asiatica</i>         | 188020    | min 26, median 320, max 7157  |                                                                                                                                                                                                                     |
| <i>Echinops telfairi</i>              | 80067     | min 26, median 347, max 7224  |                                                                                                                                                                                                                     |
| <i>Orycteropus afer afer</i>          | 280733    | min 26, median 338, max 10311 |                                                                                                                                                                                                                     |
| <i>Elephantulus edwardii</i>          | 337288    | min 26, median 302, max 7108  |                                                                                                                                                                                                                     |
| <i>Trichechus manatus latirostris</i> | 230983    | min 26, median 435, max 14101 |                                                                                                                                                                                                                     |
| <i>Procapra capensis</i>              | 156595    | min 32, median 736, max 11303 |                                                                                                                                                                                                                     |
| <i>Loxodonta africana</i>             | 253130    | min 26, median 474, max 14036 |                                                                                                                                                                                                                     |
| <i>Erinaceus europaeus</i>            | 130943    | min 26, median 308, max 10024 |                                                                                                                                                                                                                     |
| <i>Sorex araneus</i>                  | 133563    | min 26, median 332, max 10424 |                                                                                                                                                                                                                     |
| <i>Condylura cristata</i>             | 89051     | min 26, median 275, max 7199  |                                                                                                                                                                                                                     |
| <i>Pteropus alecto</i>                | 148833    | min 26, median 401, max 12178 |                                                                                                                                                                                                                     |
| <i>Pteropus vampyrus</i>              | 86961     | min 32, median 309, max 9856  |                                                                                                                                                                                                                     |
| <i>Eidolon helvum</i>                 | 67966     | min 32, median 219, max 8961  |                                                                                                                                                                                                                     |
| <i>Megaderma lyra</i>                 | 58222     | min 32, median 210, max 9765  |                                                                                                                                                                                                                     |
| <i>Rhinolophus ferrumequinum</i>      | 75604     | min 33, median 212, max 9717  |                                                                                                                                                                                                                     |
| <i>Pteronotus parnellii</i>           | 69432     | min 32, median 188, max 9062  |                                                                                                                                                                                                                     |
| <i>Eptesicus fuscus</i>               | 110090    | min 26, median 315, max 11254 |                                                                                                                                                                                                                     |
| <i>Myotis brandtii</i>                | 120200    | min 26, median 317, max 10288 |                                                                                                                                                                                                                     |
| <i>Myotis davidii</i>                 | 95878     | min 26, median 267, max 11658 |                                                                                                                                                                                                                     |
| <i>Myotis lucifugus</i>               | 118834    | min 26, median 366, max 12207 |                                                                                                                                                                                                                     |



| Species                                         | # L1 hits | Length distribution (bp)      | Notes |
|-------------------------------------------------|-----------|-------------------------------|-------|
| <i>Ceratotherium simum simum</i>                | 197102    | min 26, median 392, max 12095 |       |
| <i>Equus przewalskii</i>                        | 123829    | min 29, median 377, max 15366 |       |
| <i>Equus caballus</i> (Thoroughbred)            | 200731    | min 26, median 410, max 13504 |       |
| <i>Equus caballus</i> (Mongolian)               | 115028    | min 32, median 324, max 15282 |       |
| <i>Manis pentadactyla</i>                       | 133451    | min 29, median 195, max 10267 |       |
| <i>Felis catus</i>                              | 206663    | min 26, median 371, max 11426 |       |
| <i>Panthera tigris altaica</i>                  | 195025    | min 26, median 385, max 13604 |       |
| <i>Canis lupus familiaris</i>                   | 189577    | min 26, median 368, max 11672 |       |
| <i>Ursus maritimus</i>                          | 193442    | min 26, median 378, max 13373 |       |
| <i>Ailuropoda melanoleuca</i>                   | 124602    | min 26, median 289, max 11844 |       |
| <i>Leptonychotes weddellii</i>                  | 146135    | min 26, median 330, max 10738 |       |
| <i>Odobenus rosmarus divergens</i>              | 164744    | min 26, median 371, max 11279 |       |
| <i>Mustela putorius furo</i>                    | 193128    | min 26, median 362, max 10819 |       |
| <i>Camelus dromedarius</i>                      | 155118    | min 26, median 344, max 11206 |       |
| <i>Camelus ferus</i>                            | 132511    | min 26, median 328, max 11795 |       |
| <i>Vicugna pacos</i>                            | 194213    | min 26, median 346, max 10598 |       |
| <i>Sus scrofa</i> (Duroc)                       | 251960    | min 26, median 350, max 11196 |       |
| <i>Sus scrofa</i> (Tibetan)                     | 169743    | min 26, median 383, max 13253 |       |
| <i>Sus scrofa</i> (Ellegaard Gottingen minipig) | 143892    | min 29, median 372, max 11185 |       |
| <i>Balaenoptera acutorostrata scammoni</i>      | 239254    | min 26, median 401, max 10933 |       |
| <i>Physeter catodon</i>                         | 162334    | min 29, median 407, max 13070 |       |
| <i>Lipotes vexillifer</i>                       | 198338    | min 26, median 458, max 15715 |       |
| <i>Tursiops truncatus</i>                       | 206606    | min 29, median 296, max 14307 |       |
| <i>Orcinus orca</i>                             | 243602    | min 26, median 415, max 12828 |       |
| <i>Panholops hodgsonii</i>                      | 140895    | min 26, median 293, max 10045 |       |
| <i>Capra hircus</i>                             | 172850    | min 26, median 307, max 11295 |       |
| <i>Ovis aries</i> (Texel)                       | 170755    | min 26, median 320, max 12550 |       |
| <i>Ovis aries musimon</i>                       | 118754    | min 26, median 287, max 12652 |       |
| <i>Bubalus bubalis</i>                          | 170578    | min 26, median 372, max 16417 |       |
| <i>Bison bison bison</i>                        | 222104    | min 26, median 366, max 12472 |       |
| <i>Bos mutus</i>                                | 125229    | min 26, median 291, max 12276 |       |
| <i>Bos indicus</i>                              | 162944    | min 26, median 329, max 12582 |       |
| <i>Bos taurus</i>                               | 183282    | min 26, median 338, max 12798 |       |
| <i>Ochotona princeps</i>                        | 63231     | min 26, median 319, max 7183  |       |
| <i>Oryctolagus cuniculus</i>                    | 165637    | min 26, median 386, max 13252 |       |
| <i>Ictidomys tridecemlineatus</i>               | 153340    | min 29, median 359, max 8996  |       |
| <i>Heterocephalus glaber</i>                    | 211256    | min 26, median 365, max 9489  |       |
| <i>Fukomys damarensis</i>                       | 179459    | min 26, median 377, max 10470 |       |
| <i>Cavia aperea</i>                             | 215721    | min 26, median 344, max 12977 |       |

| Species                                | # L1 hits | Length distribution (bp)      | Notes |
|----------------------------------------|-----------|-------------------------------|-------|
| <i>Cavia porcellus</i>                 | 202062    | min 26, median 524, max 13197 |       |
| <i>Chinchilla lanigera</i>             | 162543    | min 26, median 374, max 9883  |       |
| <i>Octodon degus</i>                   | 181971    | min 26, median 365, max 7751  |       |
| <i>Dipodomys ordii</i>                 | 39663     | min 29, median 111, max 7728  |       |
| <i>Jaculus jaculus</i>                 | 132427    | min 26, median 365, max 7362  |       |
| <i>Nannospalax galili</i>              | 136751    | min 26, median 407, max 7868  |       |
| <i>Mesocricetus auratus</i>            | 117603    | min 26, median 374, max 9681  |       |
| <i>Cricetulus griseus</i>              | 90706     | min 26, median 329, max 11338 |       |
| <i>Microtus ochrogaster</i>            | 91178     | min 26, median 332, max 6404  |       |
| <i>Peromyscus maniculatus bairdii</i>  | 72159     | min 26, median 335, max 9389  |       |
| <i>Rattus norvegicus</i>               | 193696    | min 26, median 518, max 11866 |       |
| <i>Mus musculus</i>                    | 197761    | min 26, median 502, max 18858 |       |
| <i>Tupaia belangeri</i>                | 68588     | min 32, median 463, max 10269 |       |
| <i>Tupaia chinensis</i>                | 110904    | min 26, median 393, max 11021 |       |
| <i>Galeopterus variegatus</i>          | 176635    | min 26, median 174, max 9846  |       |
| <i>Otolemur garnettii</i>              | 196900    | min 26, median 363, max 8925  |       |
| <i>Microcebus murinus</i>              | 106690    | min 32, median 286, max 10808 |       |
| <i>Tarsius syrichta</i>                | 186988    | min 26, median 385, max 16139 |       |
| <i>Callithrix jacchus</i>              | 271588    | min 26, median 430, max 12568 |       |
| <i>Saimiri boliviensis boliviensis</i> | 203913    | min 26, median 397, max 11877 |       |
| <i>Rhinopithecus roxellana</i>         | 185188    | min 26, median 443, max 15293 |       |
| <i>Nasalis larvatus</i>                | 202605    | min 26, median 395, max 10716 |       |
| <i>Chlorocebus sabaeus</i>             | 233704    | min 26, median 386, max 12077 |       |
| <i>Macaca fascicularis</i>             | 252545    | min 26, median 400, max 13479 |       |
| <i>Macaca mulatta</i>                  | 238315    | min 26, median 329, max 10898 |       |
| <i>Papio anubis</i>                    | 263380    | min 26, median 404, max 14592 |       |
| <i>Nomascus leucogenys</i>             | 244864    | min 26, median 416, max 14766 |       |
| <i>Pongo abelii</i>                    | 297567    | min 26, median 421, max 13087 |       |
| <i>Gorilla gorilla gorilla</i>         | 263332    | min 26, median 395, max 27891 |       |
| <i>Pan paniscus</i>                    | 233415    | min 26, median 440, max 14715 |       |
| <i>Pan troglodytes</i>                 | 264123    | min 26, median 410, max 16238 |       |
| <i>Homo sapiens</i>                    | 257636    | min 26, median 406, max 18773 |       |
| <b>SAUROPSIDA</b>                      |           |                               |       |
| <i>Apalone spinifera</i>               | 2560      | min 29, median 372, max 5911  |       |
| <i>Pelodiscus sinensis</i>             | 2031      | min 32, median 511, max 7157  |       |
| <i>Chelonia mydas</i>                  | 5240      | min 32, median 477, max 8320  |       |
| <i>Chrysemys picta bellii</i>          | 3714      | min 32, median 551, max 8573  |       |
| <i>Struthio camelus australis</i>      | 61        | min 75, median 254, max 3825  |       |
| <i>Tinamus guttatus</i>                | 27        | min 83, median 281, max 1197  |       |
| <i>Anas platyrhynchos</i>              | 51        | min 98, median 236, max 4578  |       |
| <i>Lyrurus tetrix tetrix</i>           | 21        | min 72, median 248, max 780   |       |
| <i>Gallus gallus</i>                   | 22        | min 87, median 192, max 4412  |       |
| <i>Coturnix japonica</i>               | 8         | min 82, median 146, max 893   |       |
| <i>Meleagris gallopavo</i>             | 14        | min 86, median 230, max 4020  |       |

| Species                                | # L1 hits | Length distribution (bp)      | Notes |
|----------------------------------------|-----------|-------------------------------|-------|
| <i>Colinus virginianus</i>             | 127       | min 70, median 357, max 4090  |       |
| <i>Acanthisitta chloris</i>            | 42        | min 90, median 287, max 4493  |       |
| <i>Manacus vitellinus</i>              | 36        | min 102, median 251, max 4602 |       |
| <i>Zonotrichia albicollis</i>          | 37        | min 65, median 211, max 4512  |       |
| <i>Geospiza fortis</i>                 | 27        | min 114, median 272, max 4489 |       |
| <i>Serinus canaria</i>                 | 386       | min 61, median 103, max 4516  |       |
| <i>Taeniopygia guttata</i>             | 30        | min 84, median 258, max 4354  |       |
| <i>Ficedula albicollis</i>             | 34        | min 108, median 272, max 4569 |       |
| <i>Pseudopodoces humilis</i>           | 40        | min 68, median 227, max 4312  |       |
| <i>Corvus brachyrhynchos</i>           | 57        | min 68, median 248, max 4515  |       |
| <i>Corvus cornix cornix</i>            | 43        | min 76, median 257, max 4586  |       |
| <i>Ara macao</i>                       | 50        | min 107, median 278, max 2083 |       |
| <i>Amazona vittata</i>                 | 63        | min 72, median 268, max 3513  |       |
| <i>Melopsittacus undulatus</i>         | 38        | min 73, median 280, max 3737  |       |
| <i>Nestor notabilis</i>                | 54        | min 95, median 267, max 3928  |       |
| <i>Falco cherrug</i>                   | 59        | min 101, median 280, max 4512 |       |
| <i>Falco peregrinus</i>                | 58        | min 86, median 276, max 3806  |       |
| <i>Cariama cristata</i>                | 62        | min 125, median 273, max 4604 |       |
| <i>Merops nubicus</i>                  | 40        | min 121, median 269, max 4075 |       |
| <i>Picoides pubescens</i>              | 37        | min 72, median 212, max 641   |       |
| <i>Buceros rhinoceros silvestris</i>   | 43        | min 71, median 289, max 4513  |       |
| <i>Apaloderma vittatum</i>             | 32        | min 117, median 316, max 3858 |       |
| <i>Leptosomus discolor</i>             | 46        | min 128, median 267, max 3646 |       |
| <i>Haliaeetus albicilla</i>            | 65        | min 116, median 290, max 4593 |       |
| <i>Haliaeetus leucocephalus</i>        | 68        | min 85, median 290, max 4600  |       |
| <i>Aquila chrysaetos canadensis</i>    | 64        | min 127, median 291, max 4567 |       |
| <i>Cathartes aura</i>                  | 81        | min 89, median 305, max 4211  |       |
| <i>Tyto alba</i>                       | 100       | min 75, median 272, max 4540  |       |
| <i>Colinus striatus</i>                | 42        | min 85, median 275, max 4391  |       |
| <i>Charadrius vociferus</i>            | 64        | min 106, median 290, max 4520 |       |
| <i>Balearica regulorum gibbericeps</i> | 61        | min 111, median 316, max 4608 |       |
| <i>Chlamydotis macqueenii</i>          | 57        | min 69, median 270, max 4065  |       |
| <i>Cuculus canorus</i>                 | 42        | min 119, median 252, max 3744 |       |
| <i>Fulmarus glacialis</i>              | 68        | min 70, median 280, max 4628  |       |
| <i>Aptenodytes forsteri</i>            | 79        | min 76, median 269, max 4724  |       |
| <i>Pygoscelis adeliae</i>              | 75        | min 89, median 281, max 4834  |       |
| <i>Phalacrocorax carbo</i>             | 57        | min 50, median 289, max 3731  |       |
| <i>Pelecanus crispus</i>               | 57        | min 121, median 286, max 4581 |       |
| <i>Nipponia nippon</i>                 | 71        | min 76, median 296, max 4564  |       |
| <i>Egretta garzetta</i>                | 66        | min 92, median 276, max 4598  |       |
| <i>Phaethon lepturus</i>               | 47        | min 151, median 308, max 4615 |       |
| <i>Gavia stellata</i>                  | 74        | min 88, median 262, max 4577  |       |
| <i>Tauraco erythrolophus</i>           | 45        | min 115, median 289, max 4514 |       |

| Species                            | # L1 hits | Length distribution (bp)      | Notes |
|------------------------------------|-----------|-------------------------------|-------|
| <i>Opisthocomus hoazin</i>         | 80        | min 47, median 326, max 4184  |       |
| <i>Columba livia</i>               | 55        | min 109, median 281, max 4523 |       |
| <i>Pterocles gutturalis</i>        | 56        | min 106, median 279, max 4508 |       |
| <i>Calypte anna</i>                | 31        | min 137, median 286, max 3924 |       |
| <i>Chaetura pelagica</i>           | 29        | min 100, median 253, max 4553 |       |
| <i>Caprimulgus carolinensis</i>    | 68        | min 83, median 268, max 4374  |       |
| <i>Eurypyga helias</i>             | 41        | min 102, median 251, max 4514 |       |
| <i>Mesitornis unicolor</i>         | 41        | min 130, median 300, max 4484 |       |
| <i>Podiceps cristatus</i>          | 50        | min 127, median 282, max 4730 |       |
| <i>Phoenicopterus ruber ruber</i>  | 77        | min 124, median 278, max 4626 |       |
| <i>Alligator mississippiensis</i>  | 4412      | min 32, median 624, max 13520 |       |
| <i>Alligator sinensis</i>          | 6253      | min 29, median 569, max 9201  |       |
| <i>Crocodylus porosus</i>          | 3948      | min 32, median 579, max 7709  |       |
| <i>Gavialis gangeticus</i>         | 3989      | min 29, median 592, max 13044 |       |
| <i>Pogona vitticeps</i>            | 6767      | min 32, median 440, max 4971  |       |
| <i>Anolis carolinensis</i>         | 12551     | min 26, median 518, max 9160  |       |
| <i>Vipera berus berus</i>          | 5714      | min 41, median 585, max 5375  |       |
| <i>Crotalus mitchellii pyrrhus</i> | 3591      | min 53, median 390, max 4019  |       |
| <i>Ophiophagus hannah</i>          | 9742      | min 38, median 364, max 6767  |       |
| <i>Python bivittatus</i>           | 4679      | min 38, median 542, max 5737  |       |
| <b>AMPHIBIA</b>                    |           |                               |       |
| <i>Nanorana parkeri</i>            | 18787     | min 38, median 767, max 5619  |       |
| <i>Xenopus laevis</i>              | 26764     | min 32, median 623, max 6227  |       |
| <i>Xenopus tropicalis</i>          | 8638      | min 32, median 659, max 9353  |       |
| <b>NEOPTERYGII</b>                 |           |                               |       |
| <i>Lepisosteus oculatus</i>        | 876       | min 65, median 596, max 5363  |       |
| <i>Anguilla anguilla</i>           | 1672      | min 47, median 422, max 5766  |       |
| <i>Anguilla japonica</i>           | 1833      | min 53, median 517, max 5112  |       |
| <i>Danio rerio</i>                 | 5140      | min 29, median 614, max 8441  |       |
| <i>Astyanax mexicanus</i>          | 975       | min 41, median 479, max 4962  |       |
| <i>Oryzias latipes</i>             | 4496      | min 41, median 641, max 5918  |       |
| <i>Poecilia formosa</i>            | 1505      | min 29, median 659, max 5676  |       |
| <i>Xiphophorus maculatus</i>       | 1217      | min 47, median 652, max 5655  |       |
| <i>Fundulus heteroclitus</i>       | 2825      | min 38, median 617, max 5485  |       |
| <i>Takifugu flavidus</i>           | 709       | min 59, median 564, max 5147  |       |
| <i>Takifugu rubripes</i>           | 825       | min 44, median 553, max 5497  |       |
| <i>Tetraodon nigroviridis</i>      | 232       | min 32, median 539, max 5422  |       |
| <i>Cynoglossus semilaevis</i>      | 196       | min 73, median 383, max 4385  |       |
| <i>Haplochromis burtoni</i>        | 1666      | min 44, median 729, max 6085  |       |
| <i>Pundamilia nyererei</i>         | 1852      | min 41, median 695, max 5895  |       |
| <i>Maylandia zebra</i>             | 2116      | min 44, median 680, max 6900  |       |
| <i>Neolamprologus brichardi</i>    | 1915      | min 47, median 620, max 5431  |       |
| <i>Oreochromis niloticus</i>       | 3265      | min 47, median 698, max 6629  |       |
| <i>Sebastes nigrocinctus</i>       | 912       | min 74, median 494, max 6241  |       |

| Species                           | # L1 hits | Length distribution (bp)      | Notes |
|-----------------------------------|-----------|-------------------------------|-------|
| <i>Sebastes rubrivinctus</i>      | 878       | min 68, median 507, max 6040  |       |
| <i>Gasterosteus aculeatus</i>     | 507       | min 71, median 493, max 4992  |       |
| <i>Gadus morhua</i>               | 1635      | min 44, median 410, max 5389  |       |
| <b>CHONDRICHTHYES</b>             |           |                               |       |
| <i>Callorhynchus milii</i>        | 209       | min 32, median 368, max 2778  |       |
| <i>Carcharhinus brachyurus</i>    | 3388      | min 44, median 200, max 5019  |       |
| <b>ECDYSOZOA</b>                  |           |                               |       |
| <i>Ephemera danica</i>            | 114       | min 56, median 700, max 3669  |       |
| <i>Ladona fulva</i>               | 477       | min 38, median 770, max 3645  |       |
| <i>Pediculus humanus corporis</i> | 68        | min 89, median 308, max 1819  |       |
| <i>Frankliniella occidentalis</i> | 193       | min 70, median 256, max 4011  |       |
| <i>Diaphorina citri</i>           | 1175      | min 75, median 289, max 3389  |       |
| <i>Pachypsylla venusta</i>        | 243       | min 84, median 217, max 2029  |       |
| <i>Acyrtosiphon pisum</i>         | 155       | min 80, median 672, max 2723  |       |
| <i>Nilaparvata lugens</i>         | 2093      | min 44, median 452, max 8772  |       |
| <i>Oncopeltus fasciatus</i>       | 244       | min 72, median 203, max 1815  |       |
| <i>Rhodnius prolixus</i>          | 165       | min 74, median 641, max 3250  |       |
| <i>Cimex lectularius</i>          | 1070      | min 81, median 203, max 2489  |       |
| <i>Onthophagus taurus</i>         | 161       | min 83, median 669, max 2726  |       |
| <i>Agrilus planipennis</i>        | 197       | min 35, median 455, max 2009  |       |
| <i>Tribolium castaneum</i>        | 34        | min 53, median 686, max 2591  |       |
| <i>Anoplophora glabripennis</i>   | 121       | min 83, median 611, max 2501  |       |
| <i>Leptinotarsa decemlineata</i>  | 484       | min 59, median 785, max 2698  |       |
| <i>Dendroctonus ponderosae</i>    | 135       | min 53, median 569, max 2322  |       |
| <i>Mengenilla moldrzyki</i>       | 15        | min 73, median 189, max 2534  |       |
| <i>Aedes aegypti</i>              | 3589      | min 38, median 737, max 5629  |       |
| <i>Culex quinquefasciatus</i>     | 947       | min 41, median 743, max 5511  |       |
| <i>Anopheles albimanus</i>        | 45        | min 88, median 192, max 4306  |       |
| <i>Anopheles arabiensis</i>       | 179       | min 59, median 442, max 3029  |       |
| <i>Anopheles atroparvus</i>       | 191       | min 71, median 516, max 2842  |       |
| <i>Anopheles christyi</i>         | 112       | min 89, median 446, max 2247  |       |
| <i>Anopheles culicifacies</i>     | 279       | min 62, median 407, max 3851  |       |
| <i>Anopheles darlingi</i>         | 35        | min 71, median 176, max 3308  |       |
| <i>Anopheles dirus</i>            | 390       | min 88, median 575, max 3077  |       |
| <i>Anopheles epiroticus</i>       | 194       | min 41, median 486, max 4385  |       |
| <i>Anopheles farauti</i>          | 403       | min 59, median 520, max 4720  |       |
| <i>Anopheles funestus</i>         | 192       | min 70, median 551, max 4515  |       |
| <i>Anopheles gambiae</i>          | 321       | min 35, median 546, max 4880  |       |
| <i>Anopheles maculatus</i>        | 97        | min 65, median 533, max 2325  |       |
| <i>Anopheles melas</i>            | 138       | min 71, median 376, max 3158  |       |
| <i>Anopheles merus</i>            | 250       | min 65, median 425, max 4176  |       |
| <i>Anopheles minimus</i>          | 163       | min 107, median 493, max 3995 |       |
| <i>Anopheles quadriannulatus</i>  | 185       | min 65, median 399, max 3170  |       |
| <i>Anopheles sinensis</i>         | 104       | min 92, median 499, max 4494  |       |

| Species                                       | # L1 hits | Length distribution (bp)       | Notes |
|-----------------------------------------------|-----------|--------------------------------|-------|
| <i>Anopheles stephensi</i>                    | 110       | min 91, median 494, max 3220   |       |
| <i>Mayetiola destructor</i>                   | 29        | min 83, median 677, max 2666   |       |
| <i>Lutzomyia longipalpis</i>                  | 11        | min 150, median 1016, max 2372 |       |
| <i>Phlebotomus papatasi</i>                   | 36        | min 68, median 1082, max 2675  |       |
| <i>Ceratitis capitata</i>                     | 112       | min 53, median 335, max 7274   |       |
| <i>Drosophila albomicans</i>                  | 50        | min 73, median 136, max 1699   |       |
| <i>Drosophila ananassae</i>                   | 24        | min 68, median 179, max 1091   |       |
| <i>Drosophila biarmipes</i>                   | 25        | min 78, median 225, max 1759   |       |
| <i>Drosophila bipectinata</i>                 | 19        | min 68, median 329, max 1503   |       |
| <i>Drosophila elegans</i>                     | 32        | min 63, median 186, max 1241   |       |
| <i>Drosophila erecta</i>                      | 24        | min 82, median 200, max 956    |       |
| <i>Drosophila eugracilis</i>                  | 25        | min 89, median 227, max 1472   |       |
| <i>Drosophila ficusphila</i>                  | 77        | min 88, median 758, max 3911   |       |
| <i>Drosophila grimshawi</i>                   | 70        | min 76, median 114, max 882    |       |
| <i>Drosophila kikkawai</i>                    | 36        | min 87, median 221, max 1311   |       |
| <i>Drosophila melanogaster</i>                | 16        | min 97, median 134, max 2001   |       |
| <i>Drosophila miranda</i>                     | 30        | min 76, median 148, max 4515   |       |
| <i>Drosophila mojavensis</i>                  | 113       | min 68, median 210, max 1345   |       |
| <i>Drosophila persimilis</i>                  | 36        | min 67, median 122, max 837    |       |
| <i>Drosophila pseudoobscura pseudoobscura</i> | 34        | min 70, median 157, max 953    |       |
| <i>Drosophila rhopaloa</i>                    | 18        | min 104, median 179, max 1143  |       |
| <i>Drosophila sechellia</i>                   | 17        | min 92, median 225, max 629    |       |
| <i>Drosophila simulans</i>                    | 19        | min 77, median 169, max 531    |       |
| <i>Drosophila sukukii</i>                     | 38        | min 86, median 174, max 5555   |       |
| <i>Drosophila takahashii</i>                  | 26        | min 96, median 180, max 1660   |       |
| <i>Drosophila virilis</i>                     | 68        | min 69, median 125, max 2055   |       |
| <i>Drosophila willistoni</i>                  | 41        | min 72, median 152, max 1050   |       |
| <i>Drosophila yakuba</i>                      | 22        | min 66, median 182, max 2240   |       |
| <i>Musca domestica</i>                        | 117       | min 44, median 393, max 2615   |       |
| <i>Glossina austeni</i>                       | 156       | min 71, median 187, max 1413   |       |
| <i>Glossina brevipalpis</i>                   | 188       | min 81, median 232, max 1514   |       |
| <i>Glossina fuscipes fuscipes</i>             | 162       | min 69, median 169, max 2801   |       |
| <i>Glossina morsitans morsitans</i>           | 151       | min 72, median 176, max 2225   |       |
| <i>Glossina pallidipes</i>                    | 139       | min 75, median 168, max 1505   |       |
| <i>Limnephilus lunatus</i>                    | 105       | min 44, median 266, max 1604   |       |
| <i>Papilio glaucus</i>                        | 144       | min 35, median 410, max 1434   |       |
| <i>Papilio polytes</i>                        | 13        | min 126, median 275, max 2819  |       |
| <i>Papilio xuthus</i>                         | 22        | min 138, median 1647, max 2328 |       |
| <i>Heliconius melpomene melpomene</i>         | 12        | min 89, median 150, max 2300   |       |
| <i>Melitaea cinxia</i>                        | 30        | min 85, median 213, max 2459   |       |
| <i>Danaus plexippus</i>                       | 27        | min 71, median 416, max 3429   |       |
| <i>Bombyx mori</i>                            | 4934      | min 82, median 306, max 2427   |       |
| <i>Manduca sexta</i>                          | 33        | min 70, median 772, max 2360   |       |

| Species                             | # L1 hits | Length distribution (bp)      | Notes |
|-------------------------------------|-----------|-------------------------------|-------|
| <i>Plutella xylostella</i>          | 143       | min 80, median 1475, max 2747 |       |
| <i>Athalia rosae</i>                | 26        | min 64, median 214, max 2468  |       |
| <i>Cephus cinctus</i>               | 52        | min 94, median 300, max 2198  |       |
| <i>Orussus abietinus</i>            | 31        | min 89, median 362, max 1745  |       |
| <i>Ceratosolen solmsi marchali</i>  | 258       | min 75, median 163, max 1425  |       |
| <i>Nasonia giraulti</i>             | 41        | min 76, median 206, max 2043  |       |
| <i>Nasonia longicornis</i>          | 32        | min 83, median 200, max 2489  |       |
| <i>Nasonia vitripennis</i>          | 84        | min 67, median 151, max 2216  |       |
| <i>Copidosoma floridanum</i>        | 157       | min 74, median 386, max 2177  |       |
| <i>Trichogramma pretiosum</i>       | 53        | min 80, median 440, max 2543  |       |
| <i>Microplitis demolitor</i>        | 139       | min 88, median 929, max 2435  |       |
| <i>Megachile rotundata</i>          | 98        | min 85, median 616, max 2474  |       |
| <i>Apis dorsata</i>                 | 31        | min 95, median 247, max 1367  |       |
| <i>Apis florea</i>                  | 42        | min 73, median 174, max 1045  |       |
| <i>Apis mellifera</i>               | 35        | min 85, median 199, max 2018  |       |
| <i>Bombus impatiens</i>             | 69        | min 80, median 603, max 2302  |       |
| <i>Bombus terrestris</i>            | 52        | min 90, median 301, max 1412  |       |
| <i>Linepithema humile</i>           | 54        | min 77, median 209, max 2480  |       |
| <i>Camponotus floridanus</i>        | 37        | min 86, median 232, max 9746  |       |
| <i>Acromyrmex echinator</i>         | 79        | min 68, median 163, max 2261  |       |
| <i>Atta cephalotes</i>              | 54        | min 71, median 149, max 3899  |       |
| <i>Solenopsis invicta</i>           | 78        | min 81, median 177, max 2619  |       |
| <i>Pogonomyrmex barbatus</i>        | 29        | min 85, median 196, max 1617  |       |
| <i>Harpegnathos saltator</i>        | 294       | min 83, median 187, max 1510  |       |
| <i>Cerapachys biroi</i>             | 47        | min 68, median 191, max 1883  |       |
| <i>Blattella germanica</i>          | 2437      | min 47, median 688, max 4506  |       |
| <i>Zootermopsis nevadensis</i>      | 91        | min 47, median 488, max 2552  |       |
| <i>Locusta migratoria</i>           | 6154      | min 29, median 973, max 5039  |       |
| <i>Daphnia pulex</i>                | 284       | min 44, median 744, max 5142  |       |
| <i>Eurytemora affinis</i>           | 404       | min 85, median 450, max 3719  |       |
| <i>Lepophtheirus salmonis</i>       | 18478     | min 26, median 473, max 4755  |       |
| <i>Hyalella azteca</i>              | 211       | min 41, median 287, max 2477  |       |
| <i>Strigamia maritima</i>           | 62        | min 90, median 855, max 3003  |       |
| <i>Stegodyphus mimosarum</i>        | 929       | min 65, median 1223, max 2759 |       |
| <i>Latrodectus hesperus</i>         | 273       | min 56, median 770, max 2636  |       |
| <i>Parasteatoda tepidariorum</i>    | 125       | min 98, median 1082, max 2492 |       |
| <i>Tetranychus urticae</i>          | 54        | min 104, median 273, max 1964 |       |
| <i>Dermatophagoides farinae</i>     | 14        | min 109, median 164, max 1677 |       |
| <i>Sarcoptes scabiei type canis</i> | 49        | min 83, median 233, max 2369  |       |
| <i>Achipteria coleoptrata</i>       | 9         | min 90, median 819, max 2525  |       |
| <i>Hypochthonius rufulus</i>        | 22        | min 81, median 302, max 2180  |       |
| <i>Platynothrus peltifer</i>        | 17        | min 203, median 833, max 1340 |       |
| <i>Steganacarus magnus</i>          | 39        | min 107, median 362, max 2664 |       |
| <i>Ixodes ricinus</i>               | 871       | min 41, median 992, max 4181  |       |

| Species                                         | # L1 hits | Length distribution (bp)       | Notes |
|-------------------------------------------------|-----------|--------------------------------|-------|
| <i>Ixodes scapularis</i>                        | 2134      | min 41, median 830, max 4043   |       |
| <i>Rhipicephalus microplus</i>                  | 216       | min 134, median 673, max 3144  |       |
| <i>Metaseiulus occidentalis</i>                 | 75        | min 96, median 1058, max 1820  |       |
| <i>Varroa destructor</i>                        | 19        | min 95, median 168, max 692    |       |
| <i>Centruroides exilicauda</i>                  | 729       | min 62, median 1001, max 3491  |       |
| <i>Mesobuthus martensii</i>                     | 370       | min 75, median 857, max 4684   |       |
| <i>Limulus polyphemus</i>                       | 583       | min 44, median 674, max 4269   |       |
| <i>Trichinella spiralis</i>                     | 15        | min 79, median 284, max 1578   |       |
| <i>Ascaris suum</i>                             | 41        | min 98, median 694, max 2568   |       |
| <i>Elaeophora elaphi</i>                        | 0         | -                              |       |
| <i>Onchocerca volvulus</i>                      | 0         | -                              |       |
| <i>Steinernema monticolum</i>                   | 42        | min 85, median 405, max 824    |       |
| <i>Panagrellus redivivus</i>                    | 16        | min 102, median 495, max 2278  |       |
| <i>Haemonchus contortus</i>                     | 721       | min 38, median 398, max 2289   |       |
| <i>Necator americanus</i>                       | 50        | min 77, median 553, max 1634   |       |
| <i>Heterorhabditis bacteriophora</i>            | 1         | min 244, median 244, max 244   |       |
| <i>Caenorhabditis angaria</i>                   | 16        | min 139, median 215, max 1606  |       |
| <i>Caenorhabditis brenneri</i>                  | 42        | min 107, median 457, max 3145  |       |
| <i>Caenorhabditis briggsae</i>                  | 19        | min 93, median 240, max 1476   |       |
| <i>Caenorhabditis elegans</i>                   | 12        | min 211, median 401, max 922   |       |
| <i>Caenorhabditis japonica</i>                  | 56        | min 38, median 662, max 2528   |       |
| <i>Caenorhabditis sp. 11</i><br><i>MAF-2010</i> | 14        | min 93, median 308, max 1032   |       |
| <i>Priapulus caudatus</i>                       | 296       | min 53, median 329, max 3346   |       |
| <b>ROTIFERA</b>                                 |           |                                |       |
| <i>Adineta vaga</i>                             | 45        | min 111, median 653, max 3304  |       |
| <b>PLATYHELMINTHES</b>                          |           |                                |       |
| <i>Schistosoma curassoni</i>                    | 173       | min 52, median 64, max 2248    |       |
| <i>Schistosoma haematobium</i>                  | 159       | min 50, median 62, max 2059    |       |
| <i>Schistosoma japonicum</i>                    | 136       | min 44, median 464, max 6036   |       |
| <i>Schistosoma mansoni</i>                      | 98        | min 54, median 61, max 2968    |       |
| <i>Schistosoma margrebowiei</i>                 | 142       | min 50, median 62, max 3942    |       |
| <i>Schistosoma mattheei</i>                     | 125       | min 51, median 62, max 5065    |       |
| <i>Schistosoma rodhaini</i>                     | 95        | min 51, median 62, max 4927    |       |
| <i>Clonorchis sinensis</i>                      | 411       | min 50, median 213, max 2207   |       |
| <i>Echinococcus granulosus</i>                  | 4         | min 688, median 1110, max 1514 |       |
| <i>Echinococcus multilocularis</i>              | 8         | min 128, median 341, max 1246  |       |
| <i>Hymenolepis microstoma</i>                   | 7         | min 92, median 719, max 1445   |       |
| <i>Protopolystoma xenopodis</i>                 | 25        | min 140, median 779, max 4759  |       |
| <b>ANNELIDA</b>                                 |           |                                |       |
| <i>Capitella teleta</i>                         | 25        | min 89, median 452, max 2708   |       |
| <i>Helobdella robusta</i>                       | 652       | min 35, median 437, max 2483   |       |
| <b>MOLLUSCA</b>                                 |           |                                |       |
| <i>Crassostrea gigas</i>                        | 1344      | min 47, median 911, max 6771   |       |



| Species                                        | # L1 hits | Length distribution (bp)        | Notes |
|------------------------------------------------|-----------|---------------------------------|-------|
| <i>Lottia gigantea</i>                         | 559       | min 59, median 862, max 5151    |       |
| <i>Aplysia californica</i>                     | 1819      | min 47, median 216, max 7250    |       |
| <i>Biomphalaria glabrata</i>                   | 761       | min 53, median 253, max 3280    |       |
| <b>CNIDARIA</b>                                |           |                                 |       |
| <i>Nematostella vectensis</i>                  | 191       | min 74, median 569, max 5309    |       |
| <i>Hydra vulgaris</i>                          | 1607      | min 35, median 678, max 5900    |       |
| <b>TENTACULATA</b>                             |           |                                 |       |
| <i>Mnemiopsis leidyi</i>                       | 68        | min 93, median 868, max 2366    |       |
| <b>PLACOZOA</b>                                |           |                                 |       |
| <i>Trichoplax adhaerens</i>                    | 0         | -                               |       |
| <b>ECHINOIDEA</b>                              |           |                                 |       |
| <i>Amphimedon queenslandica</i>                | 12        | min 110, median 580, max 1238   |       |
| <i>Lytechinus variegatus</i>                   | 2319      | min 44, median 470, max 5196    |       |
| <i>Strongylocentrotus purpuratus</i>           | 4014      | min 32, median 398, max 6094    |       |
| <b>ASTEROIDEA</b>                              |           |                                 |       |
| <i>Patiria miniata</i>                         | 328       | min 59, median 704, max 4514    |       |
| <b>ENTEROPNEUSTA</b>                           |           |                                 |       |
| <i>Saccoglossus kowalevskii</i>                | 2412      | min 32, median 670, max 6255    |       |
| <b>TUNICATA</b>                                |           |                                 |       |
| <i>Ciona intestinalis</i>                      | 110       | min 77, median 546, max 4833    |       |
| <i>Ciona savignyi</i>                          | 2744      | min 38, median 839, max 11990   |       |
| <i>Botryllus schlosseri</i>                    | 726       | min 68, median 1564, max 4179   |       |
| <i>Oikopleura dioica</i>                       | 5         | min 282, median 983, max 2117   |       |
| <b>LEPTOCARDII</b>                             |           |                                 |       |
| <i>Branchiostoma floridae</i>                  | 759       | min 53, median 845, max 5842    |       |
| <b>CEPHALASPIDOMORPHI</b>                      |           |                                 |       |
| <i>Lethenteron camtschaticum</i>               | 918       | min 47, median 651, max 6536    |       |
| <i>Petromyzon marinus</i>                      | 529       | min 44, median 644, max 7409    |       |
| <b>SARCOPTERYGII</b>                           |           |                                 |       |
| <i>Latimeria chalumnae</i>                     | 12303     | min 38, median 739, max 12520   |       |
| <b>FUNGI</b>                                   |           |                                 |       |
| <i>Agaricus bisporus</i> var. <i>bisporus</i>  | 14        | min 527, median 1358, max 3596  |       |
| <i>Agaricus bisporus</i> var. <i>burnettii</i> | 15        | min 674, median 1490, max 3473  |       |
| <i>Schizophyllum commune</i>                   | 2         | min 2963, median 2963, max 3002 |       |
| <i>Coprinopsis cinerea</i>                     | 4         | min 1052, median 1184, max 2629 |       |
| <i>Moniliophthora roreri</i>                   | 2         | min 908, median 908, max 3198   |       |
| <i>Laccaria bicolor</i>                        | 2         | min 1262, median 1262, max 2974 |       |
| <i>Auricularia subglabra</i>                   | 73        | min 650, median 3038, max 3746  |       |
| <i>Coniophora puteana</i>                      | 7         | min 515, median 1616, max 3560  |       |

| Species                               | # L1 hits | Length distribution (bp)        | Notes |
|---------------------------------------|-----------|---------------------------------|-------|
| <i>Serpula lacrymans</i>              | 0         | -                               |       |
| <i>Punctularia strigosozonata</i>     | 15        | min 965, median 3182, max 3689  |       |
| <i>Gloeophyllum trabeum</i>           | 11        | min 428, median 1256, max 3527  |       |
| <i>Fomitiporia mediterranea</i>       | 1         | min 1142, median 1142, max 1142 |       |
| <i>Dichomitus squalens</i>            | 4         | min 1656, median 2546, max 3374 |       |
| <i>Fibroporia radiculosa</i>          | 1         | min 770, median 770, max 770    |       |
| <i>Phanerochaete carnosae</i>         | 10        | min 530, median 1421, max 2897  |       |
| <i>Postia placenta</i>                | 5         | min 1187, median 1703, max 2944 |       |
| <i>Trametes versicolor</i>            | 29        | min 2426, median 3143, max 3512 |       |
| <i>Heterobasidion irregulare</i>      | 5         | min 1529, median 1706, max 3103 |       |
| <i>Stereum hirsutum</i>               | 4         | min 2108, median 2324, max 3530 |       |
| <i>Spizellomyces punctatus</i>        | 0         | -                               |       |
| <i>Batrachochytrium dendrobatidis</i> | 0         | -                               |       |
| <i>Diplodia corticola</i>             | 0         | -                               |       |
| <i>Neofusicoccum parvum</i>           | 0         | -                               |       |
| <i>Baudoinia panamericana</i>         | 0         | -                               |       |
| <i>Cercospora beticola</i>            | 0         | -                               |       |
| <i>Pseudocercospora fijiensis</i>     | 8         | min 896, median 2708, max 2753  |       |
| <i>Sphaerulina musiva</i>             | 1         | min 1589, median 1589, max 1589 |       |
| <i>Zymoseptoria tritici</i>           | 5         | 902, median 1595, max 1685      |       |
| <i>Aureobasidium namibiae</i>         | 0         | -                               |       |
| <i>Aureobasidium subglaciale</i>      | 0         | -                               |       |
| <i>Coniosporium apollinis</i>         | 0         | -                               |       |
| <i>Paraphaeosphaeria sporulosa</i>    | 0         | -                               |       |
| <i>Parastagonospora nodorum</i>       | 2         | min 1352, median 1352, max 2459 |       |
| <i>Leptosphaeria maculans</i>         | 12        | min 755, median 1685, max 2792  |       |
| <i>Alternaria alternata</i>           | 0         | -                               |       |
| <i>Bipolaris maydis</i>               | 0         | -                               |       |
| <i>Bipolaris oryzae</i>               | 0         | -                               |       |
| <i>Bipolaris sorokiniana</i>          | 0         | -                               |       |
| <i>Bipolaris victoriae</i>            | 0         | -                               |       |
| <i>Bipolaris zeicola</i>              | 0         | -                               |       |
| <i>Pyrenophora teres</i>              | 0         | -                               |       |
| <i>Pyrenophora tritici-repentis</i>   | 0         | -                               |       |
| <i>Setosphaeria turcica</i>           | 0         | -                               |       |

| Species                             | # L1 hits | Length distribution (bp) | Notes |
|-------------------------------------|-----------|--------------------------|-------|
| <i>Verruconis gallopava</i>         | 0         | -                        |       |
| <i>Cyphellophora europaea</i>       | 0         | -                        |       |
| <i>Capronia coronata</i>            | 0         | -                        |       |
| <i>Capronia epimyces</i>            | 0         | -                        |       |
| <i>Cladophialophora bantiana</i>    | 0         | -                        |       |
| <i>Cladophialophora carrionii</i>   | 0         | -                        |       |
| <i>Cladophialophora immunda</i>     | 0         | -                        |       |
| <i>Cladophialophora psammophila</i> | 0         | -                        |       |
| <i>Cladophialophora yegresii</i>    | 0         | -                        |       |
| <i>Exophiala aquamarina</i>         | 0         | -                        |       |
| <i>Exophiala dermatitidis</i>       | 0         | -                        |       |
| <i>Exophiala mesophila</i>          | 0         | -                        |       |
| <i>Exophiala oligosperma</i>        | 0         | -                        |       |
| <i>Exophiala spinifera</i>          | 0         | -                        |       |
| <i>Exophiala xenobiotica</i>        | 0         | -                        |       |
| <i>Fonsecaea erecta</i>             | 0         | -                        |       |
| <i>Fonsecaea monophora</i>          | 0         | -                        |       |
| <i>Fonsecaea multimorphosa</i>      | 0         | -                        |       |
| <i>Fonsecaea nubica</i>             | 0         | -                        |       |
| <i>Fonsecaea pedrosoi</i>           | 0         | -                        |       |
| <i>Phialophora attae</i>            | 0         | -                        |       |
| <i>Rhinochadiella mackenziei</i>    | 0         | -                        |       |
| <i>Aspergillus aculeatus</i>        | 0         | -                        |       |
| <i>Aspergillus bombycis</i>         | 0         | -                        |       |
| <i>Aspergillus clavatus</i>         | 0         | -                        |       |
| <i>Aspergillus fischeri</i>         | 0         | -                        |       |
| <i>Aspergillus flavus</i>           | 0         | -                        |       |
| <i>Aspergillus fumigatus</i>        | 0         | -                        |       |
| <i>Aspergillus glaucus</i>          | 0         | -                        |       |
| <i>Aspergillus nidulans</i>         | 0         | -                        |       |
| <i>Aspergillus niger</i>            | 0         | -                        |       |
| <i>Aspergillus nomius</i>           | 0         | -                        |       |
| <i>Aspergillus oryzae</i>           | 0         | -                        |       |
| <i>Aspergillus terreus</i>          | 0         | -                        |       |
| <i>Penicillium zonata</i>           | 0         | -                        |       |
| <i>Penicillium arizonense</i>       | 0         | -                        |       |
| <i>Penicillium chrysogenum</i>      | 0         | -                        |       |
| <i>Penicillium digitatum</i>        | 0         | -                        |       |
| <i>Penicillium expansum</i>         | 0         | -                        |       |
| <i>Penicillium marneffeii</i>       | 0         | -                        |       |
| <i>Rasamsonia emersonii</i>         | 0         | -                        |       |

| Species                              | # L1 hits | Length distribution (bp)        | Notes |
|--------------------------------------|-----------|---------------------------------|-------|
| <i>Talaromyces atroroseus</i>        | 1         | min 1589, median 1589, max 1589 |       |
| <i>Talaromyces stipitatus</i>        | 7         | min 239, median 863, max 1274   |       |
| <i>Ajellomyces dermatitidis</i>      | 25        | min 494, median 953, max 1439   |       |
| <i>Arthroderma otae</i>              | 1         | min 318, median 318, max 318    |       |
| <i>Coccidioides immitis</i>          | 3         | min 944, median 944, max 1433   |       |
| <i>Coccidioides posadasii</i>        | 0         | -                               |       |
| <i>Histoplasma capsulatum</i>        | 1         | min 1442, median 1442, max 1442 |       |
| <i>Nannizzia gypsea</i>              | 0         | -                               |       |
| <i>Paracoccidioides brasiliensis</i> | 2         | min 662, median 662, max 695    |       |
| <i>Paracoccidioides lutzii</i>       | 0         | -                               |       |
| <i>Trichophyton benhamiae</i>        | 0         | -                               |       |
| <i>Trichophyton rubrum</i>           | 0         | -                               |       |
| <i>Trichophyton verrucosum</i>       | 0         | -                               |       |
| <i>Uncinocarpus reesii</i>           | 2         | min 758, median 758, max 794    |       |
| <i>Endocarpon pusillum</i>           | 7         | min 215, median 323, max 953    |       |
| <i>Tilletiaria anomala</i>           | 0         | -                               |       |
| <i>Botryotinia fuckeliana</i>        | 0         | -                               |       |
| <i>Glarea lozoyensis</i>             | 0         | -                               |       |
| <i>Marssonina brunnea</i>            | 0         | -                               |       |
| <i>Phialocephala scopiformis</i>     | 0         | -                               |       |
| <i>Sclerotinia sclerotiorum</i>      | 0         | -                               |       |
| <i>Pseudogymnoascus destructans</i>  | 3         | min 1009, median 1494, max 2726 |       |
| <i>Pseudogymnoascus verrucosus</i>   | 0         | -                               |       |
| <i>Malassezia globosa</i>            | 0         | -                               |       |
| <i>Malassezia pachydermatis</i>      | 0         | -                               |       |
| <i>Malassezia sympodialis</i>        | 5         | min 347, median 947, max 1133   |       |
| <i>Rhodotorula graminis</i>          | 0         | -                               |       |
| <i>Rhodotorula toruloides</i>        | 1         | min 2537, median 2537, max 2537 |       |
| <i>Mixia osmundae</i>                | 0         | -                               |       |
| <i>Arthrotrrys oligospora</i>        | 0         | -                               |       |
| <i>Dactylellina haptotyla</i>        | 1         | min 1802, median 1802, max 1802 |       |
| <i>Tuber melanosporum</i>            | 2         | min 218, median 218, max 1871   |       |
| <i>Pneumocystis carinii</i>          | 0         | -                               |       |
| <i>Pneumocystis jirovecii</i>        | 0         | -                               |       |
| <i>Pneumocystis murina</i>           | 0         | -                               |       |
| <i>Melampsora larici-populina</i>    | 6         | min 1373, median 1475, max 2144 |       |
| <i>Puccinia graminis</i>             | 1         | min 752, median 752, max 752    |       |
| <i>Candida albicans</i>              | 8         | min 221, median 1097, max 3446  |       |

| Species                           | # L1 hits | Length distribution (bp)        | Notes |
|-----------------------------------|-----------|---------------------------------|-------|
| <i>Candida auris</i>              | 1         | min 2327, median 2327, max 2327 |       |
| <i>Candida dubliniensis</i>       | 35        | min 41, median 390, max 4952    |       |
| <i>Candida glabrata</i>           | 0         | -                               |       |
| <i>Candida orthopsilosis</i>      | 0         | -                               |       |
| <i>Candida tanzawaensis</i>       | 1         | min 1844, median 1844, max 1844 |       |
| <i>Candida tenuis</i>             | 0         | -                               |       |
| <i>Candida tropicalis</i>         | 0         | -                               |       |
| <i>Lodderomyces elongisporus</i>  | 0         | -                               |       |
| <i>Ascoidea rubescens</i>         | 0         | -                               |       |
| <i>Babjeviella inositovora</i>    | 0         | -                               |       |
| <i>Clavispora lusitaniae</i>      | 0         | -                               |       |
| <i>Cyberlindnera jadinii</i>      | 0         | -                               |       |
| <i>Debaryomyces fabryi</i>        | 0         | -                               |       |
| <i>Debaryomyces hansenii</i>      | 0         | -                               |       |
| <i>Eremothecium cymbalariae</i>   | 0         | -                               |       |
| <i>Eremothecium gossypii</i>      | 0         | -                               |       |
| <i>Eremothecium sinECAUDUM</i>    | 0         | -                               |       |
| <i>Hyphopichia burtonii</i>       | 0         | -                               |       |
| <i>Kazachstania africana</i>      | 0         | -                               |       |
| <i>Kazachstania naganishii</i>    | 0         | -                               |       |
| <i>Kluyveromyces lactis</i>       | 0         | -                               |       |
| <i>Kluyveromyces marxianus</i>    | 0         | -                               |       |
| <i>Komagataella phaffii</i>       | 0         | -                               |       |
| <i>Kuraishia capsulata</i>        | 0         | -                               |       |
| <i>Lachancea lanzarotensis</i>    | 0         | -                               |       |
| <i>Lachancea thermotolerans</i>   | 0         | -                               |       |
| <i>Metschnikowia bicuspidata</i>  | 3         | min 158, median 410, max 1358   |       |
| <i>Meyerozyma guilliermondii</i>  | 0         | -                               |       |
| <i>Naumovozya castellii</i>       | 0         | -                               |       |
| <i>Naumovozya dairenensis</i>     | 0         | -                               |       |
| <i>Ogataea parapolyomorpha</i>    | 0         | -                               |       |
| <i>Ogataea polymorpha</i>         | 0         | -                               |       |
| <i>Saccharomyces cerevisiae</i>   | 0         | -                               |       |
| <i>Saccharomyces eubayanus</i>    | 0         | -                               |       |
| <i>Spathaspora passalidarum</i>   | 0         | -                               |       |
| <i>Sugiyamaella lignohabitans</i> | 0         | -                               |       |
| <i>Tetrapisispora blattae</i>     | 0         | -                               |       |
| <i>Tetrapisispora phaffii</i>     | 0         | -                               |       |

| Species                               | # L1 hits | Length distribution (bp)        | Notes |
|---------------------------------------|-----------|---------------------------------|-------|
| <i>Torulaspora delbrueckii</i>        | 0         | -                               |       |
| <i>Vanderwaltozyma polyspora</i>      | 0         | -                               |       |
| <i>Yarrowia lipolytica</i>            | 36        | min 89, median 926, max 6079    |       |
| <i>Zygosaccharomyces rouxii</i>       | 0         | -                               |       |
| <i>Wickerhamomyces anomalus</i>       | 4         | min 449, median 458, max 2606   |       |
| <i>Wickerhamomyces ciferrii</i>       | 8         | min 230, median 1787, max 2927  |       |
| <i>Scheffersomyces stipitis</i>       | 25        | min 1679, median 3077, max 3386 |       |
| <i>Pichia kudriavzevii</i>            | 0         | -                               |       |
| <i>Pichia membranifaciens</i>         | 0         | -                               |       |
| <i>Schizosaccharomyces cryophilus</i> | 0         | -                               |       |
| <i>Schizosaccharomyces japonicus</i>  | 0         | -                               |       |
| <i>Schizosaccharomyces octosporus</i> | 0         | -                               |       |
| <i>Schizosaccharomyces pombe</i>      | 0         | -                               |       |
| <i>Metarhizium acridum</i>            | 0         | -                               |       |
| <i>Metarhizium brunneum</i>           | 0         | -                               |       |
| <i>Metarhizium majus</i>              | 0         | -                               |       |
| <i>Metarhizium robertsii</i>          | 0         | -                               |       |
| <i>Pochonia chlamydosporia</i>        | 0         | -                               |       |
| <i>Beauveria bassiana</i>             | 2         | min 404, median 404, max 1391   |       |
| <i>Cordyceps militaris</i>            | 0         | -                               |       |
| <i>Isaria fumosorosea</i>             | 0         | -                               |       |
| <i>Trichoderma atroviride</i>         | 0         | -                               |       |
| <i>Trichoderma gamsii</i>             | 0         | -                               |       |
| <i>Trichoderma reesei</i>             | 0         | -                               |       |
| <i>Trichoderma virens</i>             | 0         | -                               |       |
| <i>Fusarium fujikuroi</i>             | 0         | -                               |       |
| <i>Fusarium graminearum</i>           | 0         | -                               |       |
| <i>Fusarium oxysporum</i>             | 4         | min 1260, median 1343, max 1523 |       |
| <i>Fusarium pseudograminearum</i>     | 0         | -                               |       |
| <i>Fusarium verticillioides</i>       | 1         | min 1292, median 1292, max 1292 |       |
| <i>Nectria haematococca</i>           | 0         | -                               |       |
| <i>Purpureocillium lilacinum</i>      | 0         | -                               |       |
| <i>Colletotrichum fioriniae</i>       | 0         | -                               |       |
| <i>Colletotrichum gloeosporioides</i> | 1         | min 1235, median 1235, max 1235 |       |
| <i>Colletotrichum graminicola</i>     | 0         | -                               |       |

| Species                                                | # L1 hits | Length distribution (bp)        | Notes |
|--------------------------------------------------------|-----------|---------------------------------|-------|
| <i>Colletotrichum higginsianum</i>                     | 3         | min 913, median 1328, max 2177  |       |
| <i>Colletotrichum orchidophilum</i>                    | 1         | min 2174, median 2174, max 2174 |       |
| <i>Verticillium alfalfae</i>                           | 0         | -                               |       |
| <i>Verticillium dahliae</i>                            | 0         | -                               |       |
| <i>Magnaporthe oryzae</i>                              | 0         | -                               |       |
| <i>Gaeumannomyces tritici</i>                          | 0         | -                               |       |
| <i>Scedosporium apiospermum</i>                        | 0         | -                               |       |
| <i>Grosmannia clavigera</i>                            | 0         | -                               |       |
| <i>Sporothrix schenckii</i>                            | 0         | -                               |       |
| <i>Chaetomium globosum</i>                             | 0         | -                               |       |
| <i>Chaetomium thermophilum</i>                         | 0         | -                               |       |
| <i>Neurospora crassa</i>                               | 0         | -                               |       |
| <i>Neurospora tetrasperma</i>                          | 0         | -                               |       |
| <i>Podospora anserina</i>                              | 0         | -                               |       |
| <i>Sordaria macrospora</i>                             | 1         | min 1025, median 1025, max 1025 |       |
| <i>Thermothelomyces thermophila</i>                    | 2         | min 359, median 359, max 722    |       |
| <i>Thielavia terrestris</i>                            | 6         | min 530, median 554, max 848    |       |
| <i>Phaeoacremonium minimum</i>                         | 0         | -                               |       |
| <i>Eutypa lata</i>                                     | 0         | -                               |       |
| <i>Pestalotiopsis fici</i>                             | 0         | -                               |       |
| <i>Cryptococcus amylolentus</i>                        | 0         | -                               |       |
| <i>Cryptococcus gattii</i>                             | 0         | -                               |       |
| <i>Cryptococcus neoformans var. grubii</i>             | 0         | -                               |       |
| <i>Cryptococcus neoformans var. neoformans JEC21</i>   | 0         | -                               |       |
| <i>Cryptococcus neoformans var. neoformans B-3501A</i> | 0         | -                               |       |
| <i>Kockovaella imperatae</i>                           | 0         | -                               |       |
| <i>Kwoniella bestiolae</i>                             | 0         | -                               |       |
| <i>Kwoniella dejecticola</i>                           | 0         | -                               |       |
| <i>Kwoniella mangroviensis</i>                         | 0         | -                               |       |
| <i>Kwoniella pini</i>                                  | 0         | -                               |       |
| <i>Tremella mesenterica</i>                            | 0         | -                               |       |
| <i>Tsuchiyaea wingfieldii</i>                          | 0         | -                               |       |
| <i>Cutaneotrichosporon oleaginosus</i>                 | 0         | -                               |       |
| <i>Trichosporon asahii</i>                             | 0         | -                               |       |
| <i>Anthracoystis flocculosa</i>                        | 0         | -                               |       |
| <i>Kalmanozyma brasiliensis</i>                        | 0         | -                               |       |

| Species                                           | # L1 hits | Length distribution (bp)        | Notes |
|---------------------------------------------------|-----------|---------------------------------|-------|
| <i>Moesziomyces antarcticus</i>                   | 0         | -                               |       |
| <i>Pseudozyma hubeiensis</i>                      | 0         | -                               |       |
| <i>Ustilago maydis</i>                            | 1         | min 2996, median 2996, max 2996 |       |
| <i>Wallemia ichthyophaga</i>                      | 0         | -                               |       |
| <i>Wallemia mellicola</i>                         | 0         | -                               |       |
| <i>Xylona heveae</i>                              | 0         | -                               |       |
| <i>Saitoella complicata</i>                       | 2         | min 912, median 912, max 1379   |       |
| <i>Lobosporangium transversale</i>                | 17        | min 485, median 2977, max 3134  |       |
| <i>Phycomyces blakesleeanus</i>                   | 146       | min 182, median 2471, max 3203  |       |
| <i>Rhizopus microsporus</i>                       | 35        | min 317, median 1229, max 2936  |       |
| <i>Encephalitozoon cuniculi</i>                   | 0         | -                               |       |
| <i>Encephalitozoon hellem</i>                     | 0         | -                               |       |
| <i>Encephalitozoon intestinalis</i>               | 0         | -                               |       |
| <i>Encephalitozoon romaleae</i>                   | 0         | -                               |       |
| <i>Enterocytozoon bieneusi</i>                    | 0         | -                               |       |
| <i>Mitosporidium daphniae</i>                     | 0         | -                               |       |
| <i>Nematocida parisii</i>                         | 0         | -                               |       |
| <i>Nosema ceranae</i>                             | 2         | min 218, median 218, max 694    |       |
| <i>Ordospora colligata</i>                        | 0         | -                               |       |
| <i>Vavraia culicis</i>                            | 0         | -                               |       |
| <i>Vittaforma corneae</i>                         | 0         | -                               |       |
| <b>VIRIDIPLANTAE</b>                              |           |                                 |       |
| <i>Micromonas pusilla</i><br><i>CCMP1545</i>      | 0         | -                               |       |
| <i>Micromonas sp. RCC299</i>                      | 0         | -                               |       |
| <i>Ostreococcus lucimarinus</i><br><i>CCE9901</i> | 0         | -                               |       |
| <i>Ostreococcus tauri</i>                         | 0         | -                               |       |
| <i>Chlamydomonas reinhardtii</i>                  | 675       | min 56, median 719, max 6259    |       |
| <i>Volvox carteri f. nagariensis</i>              | 297       | min 56, median 1013, max 8376   |       |
| <i>Chlorella variabilis</i>                       | 14        | min 72, median 788, max 2753    |       |
| <i>Auxenochlorella protothecoides</i>             | 0         | -                               |       |
| <i>Helicosporidium sp.</i><br><i>ATCC 50920</i>   | 0         | -                               |       |
| <i>Coccomyxa subellipsoidea</i><br><i>C-169</i>   | 298       | min 44, median 286, max 8994    |       |
| <i>Klebsormidium flaccidum</i>                    | 8         | min 521, median 1571, max 3187  |       |
| <i>Physcomitrella patens</i>                      | 275       | min 82, median 707, max 3257    |       |
| <i>Selaginella moellendorffii</i>                 | 221       | min 82, median 1180, max 17033  |       |
| <i>Pinus taeda</i>                                | 1744      | min 44, median 1130, max 5806   |       |
| <i>Amborella trichopoda</i>                       | 8912      | min 32, median 701, max 7437    |       |



| Species                                  | # L1 hits | Length distribution (bp)      | Notes |
|------------------------------------------|-----------|-------------------------------|-------|
| <i>Spirodela polyrhiza</i>               | 135       | min 53, median 1130, max 4144 |       |
| <i>Phoenix dactylifera</i>               | 3589      | min 35, median 916, max 6802  |       |
| <i>Elaeis oleifera</i>                   | 4151      | min 35, median 772, max 4405  |       |
| <i>Ensete ventricosum</i>                | 55        | min 50, median 716, max 2405  |       |
| <i>Musa acuminata subsp. malaccensis</i> | 724       | min 68, median 964, max 3524  |       |
| <i>Sorghum bicolor</i>                   | 4272      | min 35, median 801, max 8289  |       |
| <i>Zea mays</i>                          | 6618      | min 32, median 870, max 7283  |       |
| <i>Setaria italica</i>                   | 2918      | min 41, median 953, max 7323  |       |
| <i>Brachypodium distachyon</i>           | 3074      | min 35, median 893, max 7282  |       |
| <i>Leersia perrieri</i>                  | 1954      | min 50, median 762, max 6583  |       |
| <i>Oryza barthii</i>                     | 1610      | min 32, median 800, max 7342  |       |
| <i>Oryza brachyantha</i>                 | 485       | min 47, median 698, max 5902  |       |
| <i>Oryza glumipatula</i>                 | 1552      | min 38, median 807, max 7736  |       |
| <i>Oryza longistaminata</i>              | 1301      | min 38, median 806, max 7116  |       |
| <i>Oryza meridionalis</i>                | 1448      | min 47, median 758, max 7197  |       |
| <i>Oryza nivara</i>                      | 1617      | min 38, median 830, max 7342  |       |
| <i>Oryza punctata</i>                    | 1504      | min 38, median 812, max 7473  |       |
| <i>Oryza sativa Japonica Group</i>       | 1700      | min 38, median 925, max 7409  |       |
| <i>Zizania latifolia</i>                 | 1564      | min 53, median 1016, max 5345 |       |
| <i>Aegilops tauschii</i>                 | 11027     | min 35, median 1767, max 7683 |       |
| <i>Triticum urartu</i>                   | 10977     | min 44, median 1778, max 8407 |       |
| <i>Nelumbo nucifera</i>                  | 19318     | min 29, median 614, max 7648  |       |
| <i>Lupinus angustifolius</i>             | 2027      | min 41, median 1151, max 5768 |       |
| <i>Phaseolus vulgaris</i>                | 4448      | min 35, median 881, max 5861  |       |
| <i>Cajanus cajan</i>                     | 1228      | min 50, median 1048, max 5476 |       |
| <i>Vigna angularis var. angularis</i>    | 144       | min 89, median 349, max 2875  |       |
| <i>Vigna radiata var. radiata</i>        | 223       | min 47, median 330, max 3013  |       |
| <i>Glycine max</i>                       | 5640      | min 41, median 758, max 7151  |       |
| <i>Glycine soja</i>                      | 3923      | min 41, median 827, max 11768 |       |
| <i>Cicer arietinum</i>                   | 1325      | min 41, median 419, max 5029  |       |
| <i>Medicago truncatula</i>               | 2829      | min 41, median 617, max 7369  |       |
| <i>Trifolium pratense</i>                | 1968      | min 65, median 511, max 5762  |       |
| <i>Lotus japonicus</i>                   | 2         | min 50, median 1071, max 4150 |       |
| <i>Malus x domestica</i>                 | 1729      | min 56, median 779, max 6604  |       |
| <i>Pyrus x bretschneideri</i>            | 1729      | min 41, median 784, max 6922  |       |
| <i>Prunus mume</i>                       | 912       | min 50, median 704, max 5952  |       |
| <i>Prunus persica</i>                    | 797       | min 53, median 710, max 5889  |       |
| <i>Fragaria iinumae</i>                  | 1019      | min 41, median 589, max 6012  |       |
| <i>Fragaria nubicola</i>                 | 1168      | min 68, median 528, max 4773  |       |
| <i>Fragaria orientalis</i>               | 1446      | min 72, median 470, max 5421  |       |
| <i>Fragaria vesca subsp. vesca</i>       | 1241      | min 44, median 663, max 6199  |       |
| <i>Fragaria x ananassa</i>               | 929       | min 41, median 380, max 6013  |       |

| Species                                          | # L1 hits | Length distribution (bp)      | Notes |
|--------------------------------------------------|-----------|-------------------------------|-------|
| <i>Morus notabilis</i>                           | 980       | min 41, median 295, max 5400  |       |
| <i>Cannabis sativa</i>                           | 4612      | min 38, median 1254, max 5289 |       |
| <i>Castanea mollissima</i>                       | 4957      | min 35, median 1287, max 4424 |       |
| <i>Betula nana</i>                               | 3589      | min 50, median 710, max 5054  |       |
| <i>Cucumis melo</i>                              | 1118      | min 32, median 777, max 3963  |       |
| <i>Cucumis sativus</i>                           | 880       | min 50, median 708, max 3316  |       |
| <i>Citrullus lanatus</i>                         | 1116      | min 47, median 785, max 5049  |       |
| <i>Lagenaria siceraria</i>                       | 1019      | min 59, median 383, max 2613  |       |
| <i>Populus euphratica</i>                        | 1127      | min 56, median 923, max 6319  |       |
| <i>Populus trichocarpa</i>                       | 1547      | min 41, median 754, max 6523  |       |
| <i>Jatropha curcas</i>                           | 1905      | min 32, median 661, max 5478  |       |
| <i>Manihot esculenta subsp. flabellifolia</i>    | 1690      | min 44, median 755, max 5606  |       |
| <i>Ricinus communis</i>                          | 843       | min 62, median 591, max 3924  |       |
| <i>Linum usitatissimum</i>                       | 2158      | min 44, median 759, max 5346  |       |
| <i>Eucalyptus camaldulensis</i>                  | 4127      | min 65, median 976, max 6573  |       |
| <i>Eucalyptus grandis</i>                        | 5885      | min 35, median 1058, max 7266 |       |
| <i>Carica papaya</i>                             | 2451      | min 47, median 667, max 6410  |       |
| <i>Arabidopsis halleri subsp. gemmifera</i>      | 3059      | min 68, median 157, max 7434  |       |
| <i>Arabidopsis lyrata subsp. lyrata</i>          | 1740      | min 65, median 1274, max 6932 |       |
| <i>Arabidopsis thaliana</i>                      | 542       | min 35, median 926, max 6834  |       |
| <i>Camelina sativa</i>                           | 8025      | min 47, median 1175, max 7902 |       |
| <i>Capsella rubella</i>                          | 654       | min 41, median 1131, max 6249 |       |
| <i>Brassica napus</i>                            | 9753      | min 44, median 1580, max 8479 |       |
| <i>Brassica oleracea var. oleracea</i>           | 6991      | min 41, median 1040, max 6121 |       |
| <i>Brassica rapa</i>                             | 3425      | min 44, median 848, max 6125  |       |
| <i>Raphanus raphanistrum subsp. raphanistrum</i> | 1728      | min 76, median 2107, max 5996 |       |
| <i>Raphanus sativus</i>                          | 3064      | min 53, median 1787, max 6103 |       |
| <i>Aethionema arabicum</i>                       | 1308      | min 70, median 1628, max 5667 |       |
| <i>Arabis alpina</i>                             | 3703      | min 44, median 1184, max 6298 |       |
| <i>Eutrema parvulum</i>                          | 787       | min 47, median 952, max 6073  |       |
| <i>Eutrema salsugineum</i>                       | 1892      | min 41, median 1502, max 6363 |       |
| <i>Sisymbrium irio</i>                           | 1961      | min 59, median 1081, max 6116 |       |
| <i>Leavenworthia alabamica</i>                   | 739       | min 56, median 1139, max 5965 |       |
| <i>Tarenaya hassleriana</i>                      | 620       | min 62, median 1094, max 4380 |       |
| <i>Gossypium arboreum</i>                        | 3758      | min 44, median 1038, max 5838 |       |
| <i>Gossypium raimondii</i>                       | 5445      | min 35, median 730, max 5724  |       |
| <i>Theobroma cacao</i>                           | 2190      | min 35, median 700, max 6934  |       |
| <i>Aquilaria gallochum</i>                       | 2814      | min 44, median 725, max 4272  |       |
| <i>Azadirachta indica</i>                        | 489       | min 47, median 561, max 5194  |       |
| <i>Citrus clementine</i>                         | 1771      | min 41, median 899, max 5669  |       |
| <i>Citrus sinensis</i>                           | 2011      | min 44, median 887, max 5712  |       |

| Species                              | # L1 hits | Length distribution (bp)        | Notes |
|--------------------------------------|-----------|---------------------------------|-------|
| <i>Vitis vinifera</i>                | 6108      | min 29, median 1028, max 6808   |       |
| <i>Amaranthus hypochondriacus</i>    | 2669      | min 74, median 525, max 4869    |       |
| <i>Amaranthus tuberculatus</i>       | 184       | min 62, median 231, max 1352    |       |
| <i>Beta vulgaris subsp. vulgaris</i> | 9915      | min 41, median 989, max 6948    |       |
| <i>Spinacia oleracea</i>             | 2817      | min 50, median 1365, max 6337   |       |
| <i>Dianthus caryophyllus</i>         | 2072      | min 68, median 1925, max 4459   |       |
| <i>Actinidia chinensis</i>           | 1052      | min 47, median 913, max 5954    |       |
| <i>Vaccinium macrocarpon</i>         | 1861      | min 47, median 812, max 4536    |       |
| <i>Diospyros lotus</i>               | 2         | min 1382, median 1382, max 1950 |       |
| <i>Primula veris</i>                 | 978       | min 47, median 857, max 4168    |       |
| <i>Solanum arcanum</i>               | 2517      | min 62, median 1360, max 16602  |       |
| <i>Solanum habrochaites</i>          | 2891      | min 59, median 1273, max 14525  |       |
| <i>Solanum lycopersicum</i>          | 3046      | min 41, median 1014, max 28999  |       |
| <i>Solanum melongena</i>             | 3223      | min 50, median 1173, max 10878  |       |
| <i>Solanum pennellii</i>             | 2648      | min 38, median 1241, max 16789  |       |
| <i>Solanum pimpinellifolium</i>      | 4046      | min 43, median 785, max 16052   |       |
| <i>Solanum tuberosum</i>             | 4713      | min 44, median 878, max 16344   |       |
| <i>Capsicum annuum</i>               | 10918     | min 35, median 1305, max 6394   |       |
| <i>Nicotiana glauca</i>              | 6487      | min 53, median 1724, max 6385   |       |
| <i>Nicotiana glauca</i>              | 4987      | min 41, median 1597, max 7374   |       |
| <i>Fraxinus excelsior</i>            | 1798      | min 41, median 1215, max 4845   |       |
| <i>Penstemon centranthifolius</i>    | 38        | min 50, median 516, max 2734    |       |
| <i>Penstemon grinnellii</i>          | 23        | min 203, median 596, max 1456   |       |
| <i>Sesamum indicum</i>               | 3571      | min 35, median 902, max 4635    |       |
| <i>Genlisea aurea</i>                | 86        | min 121, median 1097, max 4055  |       |
| <i>Mimulus guttatus</i>              | 1304      | min 65, median 1112, max 5583   |       |
| <i>Conyza canadensis</i>             | 952       | min 62, median 1526, max 4530   |       |

## Table S3: BovBs in genomic data

Table S3: Shows which genomes contain BovBs (72/759) and the number of hits and length distributions. As before, BovB elements were detected with protein based searches using TBLASTN and nucleotide similarity searches using LASTZ. All hits had to satisfy a ‘reciprocal best hit’ check to check they were really BovBs (and not other repeats). Overlapping hits were merged to produce a non-redundant set of BovBs for each genome.

| Species                                 | # L1 hits | Length distribution (bp)      | Notes |
|-----------------------------------------|-----------|-------------------------------|-------|
| <b>METAZOA</b>                          |           |                               |       |
| <b>MAMMALIA</b>                         |           |                               |       |
| <i>Tachyglossus aculeatus</i>           | 3196      | min 29, median 371, max 3794  |       |
| <i>Ornithorhynchus anatinus</i>         | 3720      | min 26, median 393, max 3849  |       |
| <i>Monodelphis domestica</i>            | 6340      | min 29, median 353, max 3511  |       |
| <i>Macropus eugenii</i>                 | 2302      | min 32, median 503, max 3497  |       |
| <i>Sarcophilus harrisii</i>             | 4948      | min 29, median 410, max 3788  |       |
| <i>Dasyurus novemcinctus</i>            | 0         | -                             |       |
| <i>Choloepus hoffmanni</i>              | 0         | -                             |       |
| <i>Chrysochloris asiatica</i>           | 240967    | min 29, median 296, max 6242  |       |
| <i>Echinops telfairi</i>                | 54734     | min 29, median 275, max 3603  |       |
| <i>Orycteropus afer afer</i>            | 155026    | min 26, median 362, max 8015  |       |
| <i>Elephantulus edwardii</i>            | 392850    | min 26, median 329, max 5564  |       |
| <i>Trichechus manatus latirostris</i>   | 47995     | min 29, median 326, max 6541  |       |
| <i>Procavia capensis</i>                | 16229     | min 41, median 1049, max 5482 |       |
| <i>Loxodonta africana</i>               | 65259     | min 26, median 289, max 6341  |       |
| <i>Erinaceus europaeus</i>              | 0         | -                             |       |
| <i>Sorex araneus</i>                    | 0         | -                             |       |
| <i>Condylura cristata</i>               | 0         | -                             |       |
| <i>Pteropus alecto</i>                  | 112       | min 50, median 293, max 3182  |       |
| <i>Pteropus vampyrus</i>                | 83        | min 38, median 279, max 3200  |       |
| <i>Eidolon helvum</i>                   | 93        | min 38, median 338, max 3195  |       |
| <i>Megaderma lyra</i>                   | 79        | min 41, median 272, max 3092  |       |
| <i>Rhinolophus ferrumequinum</i>        | 101       | min 53, median 314, max 3469  |       |
| <i>Pteronotus parnellii</i>             | 75        | min 74, median 278, max 3363  |       |
| <i>Eptesicus fuscus</i>                 | 88        | min 35, median 287, max 3554  |       |
| <i>Myotis brandtii</i>                  | 116       | min 47, median 268, max 3373  |       |
| <i>Myotis davidii</i>                   | 90        | min 41, median 320, max 3615  |       |
| <i>Myotis lucifugus</i>                 | 100       | min 53, median 345, max 3917  |       |
| <i>Ceratotherium simum simum</i>        | 389       | min 38, median 547, max 3668  |       |
| <i>Equus przewalskii</i>                | 283       | min 46, median 649, max 3737  |       |
| <i>Equus caballus</i><br>(Thoroughbred) | 343       | min 44, median 359, max 3751  |       |
| <i>Equus caballus</i><br>(Mongolian)    | 302       | min 56, median 655, max 3750  |       |
| <i>Manis pentadactyla</i>               | 0         | -                             |       |

| Species                                         | # L1 hits | Length distribution (bp)     | Notes |
|-------------------------------------------------|-----------|------------------------------|-------|
| <i>Felis catus</i>                              | 0         | -                            |       |
| <i>Panthera tigris altaica</i>                  | 0         | -                            |       |
| <i>Canis lupus familiaris</i>                   | 0         | -                            |       |
| <i>Ursus maritimus</i>                          | 0         | -                            |       |
| <i>Ailuropoda melanoleuca</i>                   | 0         | -                            |       |
| <i>Leptonychotes weddellii</i>                  | 0         | -                            |       |
| <i>Odobenus rosmarus divergens</i>              | 0         | -                            |       |
| <i>Mustela putorius furo</i>                    | 0         | -                            |       |
| <i>Camelus dromedarius</i>                      | 0         | -                            |       |
| <i>Camelus ferus</i>                            | 0         | -                            |       |
| <i>Vicugna pacos</i>                            | 0         | -                            |       |
| <i>Sus scrofa</i> (Duroc)                       | 0         | -                            |       |
| <i>Sus scrofa</i> (Tibetan)                     | 0         | -                            |       |
| <i>Sus scrofa</i> (Ellegaard Gottingen minipig) | 0         | -                            |       |
| <i>Balaenoptera acutorostrata scammoni</i>      | 0         | -                            |       |
| <i>Physeter catodon</i>                         | 0         | -                            |       |
| <i>Lipotes vexillifer</i>                       | 0         | -                            |       |
| <i>Tursiops truncatus</i>                       | 0         | -                            |       |
| <i>Orcinus orca</i>                             | 0         | -                            |       |
| <i>Pantholops hodgsonii</i>                     | 335036    | min 26, median 437, max 6825 |       |
| <i>Capra hircus</i>                             | 367621    | min 26, median 405, max 7217 |       |
| <i>Ovis aries</i> (Texel)                       | 360487    | min 26, median 486, max 7170 |       |
| <i>Ovis aries musimon</i>                       | 266125    | min 26, median 518, max 7181 |       |
| <i>Bubalus bubalis</i>                          | 360889    | min 26, median 516, max 7930 |       |
| <i>Bison bison bison</i>                        | 393414    | min 26, median 498, max 8305 |       |
| <i>Bos mutus</i>                                | 304207    | min 26, median 500, max 8654 |       |
| <i>Bos indicus</i>                              | 310238    | min 26, median 609, max 8107 |       |
| <i>Bos taurus</i>                               | 334418    | min 26, median 608, max 8639 |       |
| <i>Ochotona princeps</i>                        | 0         | -                            |       |
| <i>Oryctolagus cuniculus</i>                    | 0         | -                            |       |
| <i>Ictidomys tridecemlineatus</i>               | 0         | -                            |       |
| <i>Heterocephalus glaber</i>                    | 0         | -                            |       |
| <i>Fukomys damarensis</i>                       | 0         | -                            |       |
| <i>Cavia aperea</i>                             | 0         | -                            |       |
| <i>Cavia porcellus</i>                          | 0         | -                            |       |
| <i>Chinchilla lanigera</i>                      | 0         | -                            |       |
| <i>Octodon degus</i>                            | 0         | -                            |       |
| <i>Dipodomys ordii</i>                          | 0         | -                            |       |
| <i>Jaculus jaculus</i>                          | 0         | -                            |       |
| <i>Nannospalax galili</i>                       | 0         | -                            |       |
| <i>Mesocricetus auratus</i>                     | 0         | -                            |       |
| <i>Cricetulus griseus</i>                       | 0         | -                            |       |

| Species                                | # L1 hits | Length distribution (bp) | Notes         |
|----------------------------------------|-----------|--------------------------|---------------|
| <i>Microtus ochrogaster</i>            | 0         | -                        |               |
| <i>Peromyscus maniculatus bairdii</i>  | 0         | -                        |               |
| <i>Rattus norvegicus</i>               | 0         | -                        |               |
| <i>Mus musculus</i>                    | 0         | -                        |               |
| <i>Tupaia belangeri</i>                | 0         | -                        |               |
| <i>Tupaia chinensis</i>                | 0         | -                        |               |
| <i>Galeopterus variegatus</i>          | 0         | -                        |               |
| <i>Otolemur garnettii</i>              | 0         | -                        |               |
| <i>Microcebus murinus</i>              | 0         | -                        |               |
| <i>Tarsius syrichta</i>                | 0         | -                        |               |
| <i>Callithrix jacchus</i>              | 0         | -                        |               |
| <i>Saimiri boliviensis boliviensis</i> | 0         | -                        |               |
| <i>Rhinopithecus roxellana</i>         | 0         | -                        |               |
| <i>Nasalis larvatus</i>                | 0         | -                        |               |
| <i>Chlorocebus sabaesus</i>            | 0         | -                        |               |
| <i>Macaca fascicularis</i>             | 0         | -                        |               |
| <i>Macaca mulatta</i>                  | 0         | -                        |               |
| <i>Papio anubis</i>                    | 0         | -                        |               |
| <i>Nomascus leucogenys</i>             | 0         | -                        |               |
| <i>Pongo abelii</i>                    | 0         | -                        |               |
| <i>Gorilla gorilla gorilla</i>         | 0         | -                        |               |
| <i>Pan paniscus</i>                    | 0         | -                        |               |
| <i>Pan troglodytes</i>                 | 0         | -                        |               |
| <i>Homo sapiens</i>                    | 0         | -                        |               |
| <b>SAUROPSIDA</b>                      |           |                          |               |
| <i>Apalone spinifera</i>               | 0         | -                        | Contains RTEs |
| <i>Pelodiscus sinensis</i>             | 0         | -                        | Contains RTEs |
| <i>Chelonia mydas</i>                  | 0         | -                        | Contains RTEs |
| <i>Chrysemys picta bellii</i>          | 0         | -                        | Contains RTEs |
| <i>Struthio camelus australis</i>      | 0         | -                        |               |
| <i>Tinamus guttatus</i>                | 0         | -                        |               |
| <i>Anas platyrhynchos</i>              | 0         | -                        |               |
| <i>Lyrurus tetrix tetrix</i>           | 0         | -                        |               |
| <i>Gallus gallus</i>                   | 0         | -                        |               |
| <i>Coturnix japonica</i>               | 0         | -                        |               |
| <i>Meleagris gallopavo</i>             | 0         | -                        |               |
| <i>Colinus virginianus</i>             | 0         | -                        |               |
| <i>Acanthisitta chloris</i>            | 0         | -                        |               |
| <i>Manacus vitellinus</i>              | 0         | -                        |               |
| <i>Zonotrichia albicollis</i>          | 0         | -                        |               |
| <i>Geospiza fortis</i>                 | 0         | -                        |               |
| <i>Serinus canaria</i>                 | 0         | -                        |               |
| <i>Taeniopygia guttata</i>             | 0         | -                        |               |
| <i>Ficedula albicollis</i>             | 0         | -                        |               |

| Species                                | # L1 hits | Length distribution (bp) | Notes |
|----------------------------------------|-----------|--------------------------|-------|
| <i>Pseudopodoces humilis</i>           | 0         | -                        |       |
| <i>Corvus brachyrhynchos</i>           | 0         | -                        |       |
| <i>Corvus cornix cornix</i>            | 0         | -                        |       |
| <i>Ara macao</i>                       | 0         | -                        |       |
| <i>Amazona vittata</i>                 | 0         | -                        |       |
| <i>Melopsittacus undulatus</i>         | 0         | -                        |       |
| <i>Nestor notabilis</i>                | 0         | -                        |       |
| <i>Falco cherrug</i>                   | 0         | -                        |       |
| <i>Falco peregrinus</i>                | 0         | -                        |       |
| <i>Cariama cristata</i>                | 0         | -                        |       |
| <i>Merops nubicus</i>                  | 0         | -                        |       |
| <i>Picoides pubescens</i>              | 0         | -                        |       |
| <i>Buceros rhinoceros silvestris</i>   | 0         | -                        |       |
| <i>Apaloderma vittatum</i>             | 0         | -                        |       |
| <i>Leptosomus discolor</i>             | 0         | -                        |       |
| <i>Haliaeetus albicilla</i>            | 0         | -                        |       |
| <i>Haliaeetus leucocephalus</i>        | 0         | -                        |       |
| <i>Aquila chrysaetos canadensis</i>    | 0         | -                        |       |
| <i>Cathartes aura</i>                  | 0         | -                        |       |
| <i>Tyto alba</i>                       | 0         | -                        |       |
| <i>Colius striatus</i>                 | 0         | -                        |       |
| <i>Charadrius vociferus</i>            | 0         | -                        |       |
| <i>Balearica regulorum gibbericeps</i> | 0         | -                        |       |
| <i>Chlamydotis macqueenii</i>          | 0         | -                        |       |
| <i>Cuculus canorus</i>                 | 0         | -                        |       |
| <i>Fulmarus glacialis</i>              | 0         | -                        |       |
| <i>Aptenodytes forsteri</i>            | 0         | -                        |       |
| <i>Pygoscelis adeliae</i>              | 0         | -                        |       |
| <i>Phalacrocorax carbo</i>             | 0         | -                        |       |
| <i>Pelecanus crispus</i>               | 0         | -                        |       |
| <i>Nipponia nippon</i>                 | 0         | -                        |       |
| <i>Egretta garzetta</i>                | 0         | -                        |       |
| <i>Phaethon lepturus</i>               | 0         | -                        |       |
| <i>Gavia stellata</i>                  | 0         | -                        |       |
| <i>Tauraco erythrolophus</i>           | 0         | -                        |       |
| <i>Opisthocomus hoazin</i>             | 0         | -                        |       |
| <i>Columba livia</i>                   | 0         | -                        |       |
| <i>Pterocles gutturalis</i>            | 0         | -                        |       |
| <i>Calypte anna</i>                    | 0         | -                        |       |
| <i>Chaetura pelagica</i>               | 0         | -                        |       |
| <i>Caprimulgus carolinensis</i>        | 0         | -                        |       |
| <i>Eurypyga helias</i>                 | 0         | -                        |       |
| <i>Mesitornis unicolor</i>             | 0         | -                        |       |

| Species                            | # L1 hits | Length distribution (bp)       | Notes         |
|------------------------------------|-----------|--------------------------------|---------------|
| <i>Podiceps cristatus</i>          | 0         | -                              |               |
| <i>Phoenicopterus ruber ruber</i>  | 0         | -                              |               |
| <i>Alligator mississippiensis</i>  | 0         | -                              | Contains RTEs |
| <i>Alligator sinensis</i>          | 0         | -                              | Contains RTEs |
| <i>Crocodylus porosus</i>          | 0         | -                              | Contains RTEs |
| <i>Gavialis gangeticus</i>         | 0         | -                              | Contains RTEs |
| <i>Pogona vitticeps</i>            | 63989     | min 26, median 399, max 3821   |               |
| <i>Anolis carolinensis</i>         | 20144     | min 29, median 386, max 3562   |               |
| <i>Vipera berus berus</i>          | 8885      | min 32, median 394, max 3490   |               |
| <i>Crotalus mitchellii pyrrhus</i> | 1540      | min 35, median 371, max 3360   |               |
| <i>Ophiophagus hannah</i>          | 2858      | min 29, median 344, max 3667   |               |
| <i>Python bivittatus</i>           | 6503      | min 26, median 384, max 3793   |               |
| <b>AMPHIBIA</b>                    |           |                                |               |
| <i>Nanorana parkeri</i>            | 99        | min 47, median 322, max 1766   |               |
| <i>Xenopus laevis</i>              | 81        | min 71, median 278, max 2303   |               |
| <i>Xenopus tropicalis</i>          | 69        | min 74, median 281, max 2623   |               |
| <b>NEOPTERYGII</b>                 |           |                                |               |
| <i>Lepisosteus oculatus</i>        | 102       | min 47, median 525, max 3079   |               |
| <i>Anguilla anguilla</i>           | 0         | -                              |               |
| <i>Anguilla japonica</i>           | 0         | -                              |               |
| <i>Danio rerio</i>                 | 30        | min 164, median 608, max 3079  |               |
| <i>Astyanax mexicanus</i>          | 0         | -                              |               |
| <i>Oryzias latipes</i>             | 0         | -                              |               |
| <i>Poecilia formosa</i>            | 0         | -                              |               |
| <i>Xiphophorus maculatus</i>       | 0         | -                              |               |
| <i>Fundulus heteroclitus</i>       | 0         | -                              |               |
| <i>Takifugu flavidus</i>           | 0         | -                              |               |
| <i>Takifugu rubripes</i>           | 0         | -                              |               |
| <i>Tetraodon nigroviridis</i>      | 0         | -                              |               |
| <i>Cynoglossus semilaevis</i>      | 6         | min 292, median 476, max 2463  |               |
| <i>Haplochromis burtoni</i>        | 0         | -                              |               |
| <i>Pundamilia nyererei</i>         | 0         | -                              |               |
| <i>Maylandia zebra</i>             | 0         | -                              |               |
| <i>Neolamprologus brichardi</i>    | 0         | -                              |               |
| <i>Oreochromis niloticus</i>       | 11        | min 185, median 1066, max 2829 |               |
| <i>Sebastes nigrocinctus</i>       | 0         | -                              |               |
| <i>Sebastes rubrivinctus</i>       | 0         | -                              |               |
| <i>Gasterosteus aculeatus</i>      | 0         | -                              |               |
| <i>Gadus morhua</i>                | 0         | -                              |               |
| <b>CHONDRICHTHYES</b>              |           |                                |               |
| <i>Callorhynchus milii</i>         | 0         | -                              |               |
| <i>Carcharhinus brachyurus</i>     | 0         | -                              |               |
| <b>ECDYSOZOA</b>                   |           |                                |               |
| <i>Ephemera danica</i>             | 4         | min 905, median 1259, max 2744 |               |



| Species                           | # L1 hits | Length distribution (bp)       | Notes |
|-----------------------------------|-----------|--------------------------------|-------|
| <i>Ladona fulva</i>               | 0         | -                              |       |
| <i>Pediculus humanus corporis</i> | 0         | -                              |       |
| <i>Frankliniella occidentalis</i> | 0         | -                              |       |
| <i>Diaphorina citri</i>           | 38        | min 131, median 623, max 3089  |       |
| <i>Pachypsylla venusta</i>        | 0         | -                              |       |
| <i>Acyrtosiphon pisum</i>         | 0         | -                              |       |
| <i>Nilaparvata lugens</i>         | 93        | min 182, median 1427, max 2906 |       |
| <i>Oncopeltus fasciatus</i>       | 0         | -                              |       |
| <i>Rhodnius prolixus</i>          | 0         | -                              |       |
| <i>Cimex lectularius</i>          | 176       | min 38, median 400, max 2625   |       |
| <i>Onthophagus taurus</i>         | 0         | -                              |       |
| <i>Agrilus planipennis</i>        | 0         | -                              |       |
| <i>Tribolium castaneum</i>        | 0         | -                              |       |
| <i>Anoplophora glabripennis</i>   | 0         | -                              |       |
| <i>Leptinotarsa decemlineata</i>  | 0         | -                              |       |
| <i>Dendroctonus ponderosae</i>    | 0         | -                              |       |
| <i>Mengenilla moldrzyki</i>       | 0         | -                              |       |
| <i>Aedes aegypti</i>              | 0         | -                              |       |
| <i>Culex quinquefasciatus</i>     | 0         | -                              |       |
| <i>Anopheles albimanus</i>        | 0         | -                              |       |
| <i>Anopheles arabiensis</i>       | 0         | -                              |       |
| <i>Anopheles atroparvus</i>       | 0         | -                              |       |
| <i>Anopheles christyi</i>         | 0         | -                              |       |
| <i>Anopheles culicifacies</i>     | 0         | -                              |       |
| <i>Anopheles darlingi</i>         | 0         | -                              |       |
| <i>Anopheles dirus</i>            | 0         | -                              |       |
| <i>Anopheles epiroticus</i>       | 0         | -                              |       |
| <i>Anopheles farauti</i>          | 0         | -                              |       |
| <i>Anopheles funestus</i>         | 0         | -                              |       |
| <i>Anopheles gambiae</i>          | 0         | -                              |       |
| <i>Anopheles maculatus</i>        | 0         | -                              |       |
| <i>Anopheles melas</i>            | 0         | -                              |       |
| <i>Anopheles merus</i>            | 0         | -                              |       |
| <i>Anopheles minimus</i>          | 0         | -                              |       |
| <i>Anopheles quadriannulatus</i>  | 0         | -                              |       |
| <i>Anopheles sinensis</i>         | 0         | -                              |       |
| <i>Anopheles stephensi</i>        | 0         | -                              |       |
| <i>Mayetiola destructor</i>       | 0         | -                              |       |
| <i>Lutzomyia longipalpis</i>      | 0         | -                              |       |
| <i>Phlebotomus papatasi</i>       | 0         | -                              |       |
| <i>Ceratitis capitata</i>         | 0         | -                              |       |
| <i>Drosophila albomicans</i>      | 0         | -                              |       |
| <i>Drosophila ananassae</i>       | 0         | -                              |       |
| <i>Drosophila biarmipes</i>       | 0         | -                              |       |

| Species                                                 | # L1 hits | Length distribution (bp)        | Notes         |
|---------------------------------------------------------|-----------|---------------------------------|---------------|
| <i>Drosophila bipectinata</i>                           | 0         | -                               |               |
| <i>Drosophila elegans</i>                               | 0         | -                               |               |
| <i>Drosophila erecta</i>                                | 0         | -                               |               |
| <i>Drosophila eugracilis</i>                            | 0         | -                               |               |
| <i>Drosophila ficusphila</i>                            | 0         | -                               |               |
| <i>Drosophila grimshawi</i>                             | 0         | -                               |               |
| <i>Drosophila kikkawai</i>                              | 0         | -                               |               |
| <i>Drosophila melanogaster</i>                          | 0         | -                               |               |
| <i>Drosophila miranda</i>                               | 0         | -                               |               |
| <i>Drosophila mojavensis</i>                            | 0         | -                               |               |
| <i>Drosophila persimilis</i>                            | 0         | -                               |               |
| <i>Drosophila pseudoobscura</i><br><i>pseudoobscura</i> | 0         | -                               |               |
| <i>Drosophila rhopaloa</i>                              | 0         | -                               |               |
| <i>Drosophila sechellia</i>                             | 0         | -                               |               |
| <i>Drosophila simulans</i>                              | 0         | -                               |               |
| <i>Drosophila suzukii</i>                               | 0         | -                               |               |
| <i>Drosophila takahashii</i>                            | 0         | -                               |               |
| <i>Drosophila virilis</i>                               | 0         | -                               |               |
| <i>Drosophila willistoni</i>                            | 0         | -                               |               |
| <i>Drosophila yakuba</i>                                | 0         | -                               |               |
| <i>Musca domestica</i>                                  | 0         | -                               |               |
| <i>Glossina austeni</i>                                 | 0         | -                               |               |
| <i>Glossina brevipalpis</i>                             | 0         | -                               |               |
| <i>Glossina fuscipes fuscipes</i>                       | 0         | -                               |               |
| <i>Glossina morsitans</i><br><i>morsitans</i>           | 0         | -                               |               |
| <i>Glossina pallidipes</i>                              | 0         | -                               |               |
| <i>Limnephilus lunatus</i>                              | 0         | -                               |               |
| <i>Papilio glaucus</i>                                  | 320       | min 77, median 479, max 2981    |               |
| <i>Papilio polytes</i>                                  | 0         | -                               | Contains RTEs |
| <i>Papilio xuthus</i>                                   | 0         | -                               | Contains RTEs |
| <i>Heliconius melpomene</i><br><i>melpomene</i>         | 4         | min 2124, median 2775, max 2872 |               |
| <i>Melitaea cinxia</i>                                  | 0         | -                               |               |
| <i>Danaus plexippus</i>                                 | 33        | min 62, median 470, max 2705    |               |
| <i>Bombyx mori</i>                                      | 883       | min 44, median 455, max 2995    |               |
| <i>Manduca sexta</i>                                    | 42        | min 143, median 553, max 3042   |               |
| <i>Plutella xylostella</i>                              | 19        | min 368, median 902, max 3194   |               |
| <i>Athalia rosae</i>                                    | 0         | -                               |               |
| <i>Cephus cinctus</i>                                   | 0         | -                               |               |
| <i>Orussus abietinus</i>                                | 0         | -                               |               |
| <i>Ceratosolen solmsi</i><br><i>marchali</i>            | 0         | -                               |               |
| <i>Nasonia giraulti</i>                                 | 0         | -                               |               |
| <i>Nasonia longicornis</i>                              | 0         | -                               |               |

| Species                             | # L1 hits | Length distribution (bp)      | Notes |
|-------------------------------------|-----------|-------------------------------|-------|
| <i>Nasonia vitripennis</i>          | 0         | -                             |       |
| <i>Copidosoma floridanum</i>        | 0         | -                             |       |
| <i>Trichogramma pretiosum</i>       | 0         | -                             |       |
| <i>Microplitis demolitor</i>        | 0         | -                             |       |
| <i>Megachile rotundata</i>          | 0         | -                             |       |
| <i>Apis dorsata</i>                 | 0         | -                             |       |
| <i>Apis florea</i>                  | 0         | -                             |       |
| <i>Apis mellifera</i>               | 0         | -                             |       |
| <i>Bombus impatiens</i>             | 0         | -                             |       |
| <i>Bombus terrestris</i>            | 0         | -                             |       |
| <i>Linepithema humile</i>           | 6         | min 92, median 320, max 2960  |       |
| <i>Camponotus floridanus</i>        | 0         | -                             |       |
| <i>Acromyrmex echinator</i>         | 0         | -                             |       |
| <i>Atta cephalotes</i>              | 0         | -                             |       |
| <i>Solenopsis invicta</i>           | 30        | min 209, median 549, max 3090 |       |
| <i>Pogonomyrmex barbatus</i>        | 5         | min 59, median 422, max 2948  |       |
| <i>Harpegnathos saltator</i>        | 0         | -                             |       |
| <i>Cerapachys biroi</i>             | 0         | -                             |       |
| <i>Blattella germanica</i>          | 0         | -                             |       |
| <i>Zootermopsis nevadensis</i>      | 0         | -                             |       |
| <i>Locusta migratoria</i>           | 2724      | min 26, median 659, max 3258  |       |
| <i>Daphnia pulex</i>                | 0         | -                             |       |
| <i>Eurytemora affinis</i>           | 0         | -                             |       |
| <i>Lepeophtheirus salmonis</i>      | 0         | -                             |       |
| <i>Hyalella azteca</i>              | 0         | -                             |       |
| <i>Strigamia maritima</i>           | 0         | -                             |       |
| <i>Stegodyphus mimosarum</i>        | 0         | -                             |       |
| <i>Latrodectus hesperus</i>         | 0         | -                             |       |
| <i>Parasteatoda tepidariorum</i>    | 0         | -                             |       |
| <i>Tetranychus urticae</i>          | 0         | -                             |       |
| <i>Dermatophagoides farinae</i>     | 0         | -                             |       |
| <i>Sarcoptes scabiei type canis</i> | 0         | -                             |       |
| <i>Achipteria coleoptrata</i>       | 0         | -                             |       |
| <i>Hypochthonius rufulus</i>        | 0         | -                             |       |
| <i>Platymothrus peltifer</i>        | 0         | -                             |       |
| <i>Steganacarus magnus</i>          | 0         | -                             |       |
| <i>Ixodes ricinus</i>               | 0         | -                             |       |
| <i>Ixodes scapularis</i>            | 0         | -                             |       |
| <i>Rhipicephalus microplus</i>      | 0         | -                             |       |
| <i>Metaseiulus occidentalis</i>     | 0         | -                             |       |
| <i>Varroa destructor</i>            | 0         | -                             |       |
| <i>Centruroides exilicauda</i>      | 213       | min 59, median 642, max 3251  |       |
| <i>Mesobuthus martensii</i>         | 443       | min 59, median 874, max 3737  |       |
| <i>Limulus polyphemus</i>           | 0         | -                             |       |
| <i>Trichinella spiralis</i>         | 0         | -                             |       |

| Species                                         | # L1 hits | Length distribution (bp)       | Notes |
|-------------------------------------------------|-----------|--------------------------------|-------|
| <i>Ascaris suum</i>                             | 0         | -                              |       |
| <i>Elaeophora elaphi</i>                        | 0         | -                              |       |
| <i>Onchocerca volvulus</i>                      | 0         | -                              |       |
| <i>Steinernema monticolum</i>                   | 0         | -                              |       |
| <i>Panagrellus redivivus</i>                    | 0         | -                              |       |
| <i>Haemonchus contortus</i>                     | 0         | -                              |       |
| <i>Necator americanus</i>                       | 0         | -                              |       |
| <i>Heterorhabditis bacteriophora</i>            | 0         | -                              |       |
| <i>Caenorhabditis angaria</i>                   | 0         | -                              |       |
| <i>Caenorhabditis brenneri</i>                  | 0         | -                              |       |
| <i>Caenorhabditis briggsae</i>                  | 0         | -                              |       |
| <i>Caenorhabditis elegans</i>                   | 0         | -                              |       |
| <i>Caenorhabditis japonica</i>                  | 0         | -                              |       |
| <i>Caenorhabditis sp. 11</i><br><i>MAF-2010</i> | 0         | -                              |       |
| <i>Priapulid caudatus</i>                       | 0         | -                              |       |
| <b>ROTIFERA</b>                                 |           |                                |       |
| <i>Adineta vaga</i>                             | 26        | min 110, median 1160, max 3077 |       |
| <b>PLATYHELMINTHES</b>                          |           |                                |       |
| <i>Schistosoma curassoni</i>                    | 0         | -                              |       |
| <i>Schistosoma haematobium</i>                  | 0         | -                              |       |
| <i>Schistosoma japonicum</i>                    | 0         | -                              |       |
| <i>Schistosoma mansoni</i>                      | 0         | -                              |       |
| <i>Schistosoma margrebowiei</i>                 | 0         | -                              |       |
| <i>Schistosoma mattheei</i>                     | 0         | -                              |       |
| <i>Schistosoma rodhaini</i>                     | 0         | -                              |       |
| <i>Clonorchis sinensis</i>                      | 0         | -                              |       |
| <i>Echinococcus granulosus</i>                  | 0         | -                              |       |
| <i>Echinococcus multilocularis</i>              | 0         | -                              |       |
| <i>Hymenolepis microstoma</i>                   | 0         | -                              |       |
| <i>Protopolystoma xenopodis</i>                 | 0         | -                              |       |
| <b>ANNELIDA</b>                                 |           |                                |       |
| <i>Capitella teleta</i>                         | 19        | min 134, median 329, max 1317  |       |
| <i>Helobdella robusta</i>                       | 136       | min 59, median 541, max 3005   |       |
| <b>MOLLUSCA</b>                                 |           |                                |       |
| <i>Crassostrea gigas</i>                        | 0         | -                              |       |
| <i>Lottia gigantea</i>                          | 0         | -                              |       |
| <i>Aplysia californica</i>                      | 0         | -                              |       |
| <i>Biomphalaria glabrata</i>                    | 0         | -                              |       |
| <b>CNIDARIA</b>                                 |           |                                |       |
| <i>Nematostella vectensis</i>                   | 0         | -                              |       |
| <i>Hydra vulgaris</i>                           | 0         | -                              |       |
| <b>TENTACULATA</b>                              |           |                                |       |
| <i>Mnemiopsis leidyi</i>                        | 0         | -                              |       |

| Species                                        | # L1 hits | Length distribution (bp)      | Notes          |
|------------------------------------------------|-----------|-------------------------------|----------------|
| <b>PLACOZOA</b>                                |           |                               |                |
| <i>Trichoplax adhaerens</i>                    | 0         | -                             |                |
| <b>ECHINOIDEA</b>                              |           |                               |                |
| <i>Amphimedon queenslandica</i>                | 0         | -                             |                |
| <i>Lytechinus variegatus</i>                   | 8         | min 95, median 474, max 970   |                |
| <i>Strongylocentrotus purpuratus</i>           | 70        | min 38, median 470, max 3112  |                |
| <b>ASTEROIDEA</b>                              |           |                               |                |
| <i>Patiria miniata</i>                         | 0         | -                             |                |
| <b>ENTEROPNEUSTA</b>                           |           |                               |                |
| <i>Saccoglossus kowalevskii</i>                | 0         | -                             |                |
| <b>TUNICATA</b>                                |           |                               |                |
| <i>Ciona intestinalis</i>                      | 0         | -                             |                |
| <i>Ciona savignyi</i>                          | 19        | min 155, median 799, max 2852 | RTE-like BovBs |
| <i>Botryllus schlosseri</i>                    | 0         | -                             |                |
| <i>Oikopleura dioica</i>                       | 0         | -                             |                |
| <b>LEPTOCARDII</b>                             |           |                               |                |
| <i>Branchiostoma floridae</i>                  | 0         | -                             |                |
| <b>CEPHALASPIDOMORPHI</b>                      |           |                               |                |
| <i>Lethenteron camtschaticum</i>               | 31        | min 200, median 731, max 2279 |                |
| <i>Petromyzon marinus</i>                      | 0         | -                             | Contains RTEs  |
| <b>SARCOPTERYGII</b>                           |           |                               |                |
| <i>Latimeria chalumnae</i>                     | 166       | min 41, median 511, max 2919  |                |
| <b>FUNGI</b>                                   |           |                               |                |
| <i>Agaricus bisporus</i> var. <i>bisporus</i>  | 0         | -                             |                |
| <i>Agaricus bisporus</i> var. <i>burnettii</i> | 0         | -                             |                |
| <i>Schizophyllum commune</i>                   | 0         | -                             |                |
| <i>Coprinopsis cinerea</i>                     | 0         | -                             |                |
| <i>Moniliophthora roreri</i>                   | 0         | -                             |                |
| <i>Laccaria bicolor</i>                        | 0         | -                             |                |
| <i>Auricularia subglabra</i>                   | 0         | -                             |                |
| <i>Coniophora puteana</i>                      | 0         | -                             |                |
| <i>Serpula lacrymans</i>                       | 0         | -                             |                |
| <i>Punctularia strigosozonata</i>              | 0         | -                             |                |
| <i>Gloeophyllum trabeum</i>                    | 0         | -                             |                |
| <i>Fomitiporia mediterranea</i>                | 0         | -                             |                |
| <i>Dichomitus squalens</i>                     | 0         | -                             |                |
| <i>Fibroporia radiculosa</i>                   | 0         | -                             |                |
| <i>Phanerochaete carnosae</i>                  | 0         | -                             |                |
| <i>Postia placenta</i>                         | 0         | -                             |                |
| <i>Trametes versicolor</i>                     | 0         | -                             |                |

| Species                               | # L1 hits | Length distribution (bp) | Notes |
|---------------------------------------|-----------|--------------------------|-------|
| <i>Heterobasidium irregulare</i>      | 0         | -                        |       |
| <i>Stereum hirsutum</i>               | 0         | -                        |       |
| <i>Spizellomyces punctatus</i>        | 0         | -                        |       |
| <i>Batrachochytrium dendrobatidis</i> | 0         | -                        |       |
| <i>Diplodia corticola</i>             | 0         | -                        |       |
| <i>Neofusicoccum parvum</i>           | 0         | -                        |       |
| <i>Baudoinia panamericana</i>         | 0         | -                        |       |
| <i>Cercospora beticola</i>            | 0         | -                        |       |
| <i>Pseudocercospora fijiensis</i>     | 0         | -                        |       |
| <i>Sphaerulina musiva</i>             | 0         | -                        |       |
| <i>Zymoseptoria tritici</i>           | 0         | -                        |       |
| <i>Aureobasidium namibiae</i>         | 0         | -                        |       |
| <i>Aureobasidium subglaciale</i>      | 0         | -                        |       |
| <i>Coniosporium apollinis</i>         | 0         | -                        |       |
| <i>Paraphaeosphaeria sporulosa</i>    | 0         | -                        |       |
| <i>Parastagonospora nodorum</i>       | 0         | -                        |       |
| <i>Leptosphaeria maculans</i>         | 0         | -                        |       |
| <i>Alternaria alternata</i>           | 0         | -                        |       |
| <i>Bipolaris maydis</i>               | 0         | -                        |       |
| <i>Bipolaris oryzae</i>               | 0         | -                        |       |
| <i>Bipolaris sorokiniana</i>          | 0         | -                        |       |
| <i>Bipolaris victoriae</i>            | 0         | -                        |       |
| <i>Bipolaris zeicola</i>              | 0         | -                        |       |
| <i>Pyrenophora teres</i>              | 0         | -                        |       |
| <i>Pyrenophora tritici-repentis</i>   | 0         | -                        |       |
| <i>Setosphaeria turcica</i>           | 0         | -                        |       |
| <i>Verruconis gallopava</i>           | 0         | -                        |       |
| <i>Cyphellophora europaea</i>         | 0         | -                        |       |
| <i>Capronia coronata</i>              | 0         | -                        |       |
| <i>Capronia epimyces</i>              | 0         | -                        |       |
| <i>Cladophialophora bantiana</i>      | 0         | -                        |       |
| <i>Cladophialophora carrionii</i>     | 0         | -                        |       |
| <i>Cladophialophora immunda</i>       | 0         | -                        |       |
| <i>Cladophialophora psammophila</i>   | 0         | -                        |       |
| <i>Cladophialophora yegresii</i>      | 0         | -                        |       |
| <i>Exophiala aquamarina</i>           | 0         | -                        |       |
| <i>Exophiala dermatitidis</i>         | 0         | -                        |       |
| <i>Exophiala mesophila</i>            | 0         | -                        |       |

| Species                              | # L1 hits | Length distribution (bp) | Notes |
|--------------------------------------|-----------|--------------------------|-------|
| <i>Exophiala oligosperma</i>         | 0         | -                        |       |
| <i>Exophiala spinifera</i>           | 0         | -                        |       |
| <i>Exophiala xenobiotica</i>         | 0         | -                        |       |
| <i>Fonsecaea erecta</i>              | 0         | -                        |       |
| <i>Fonsecaea monophora</i>           | 0         | -                        |       |
| <i>Fonsecaea multimorphosa</i>       | 0         | -                        |       |
| <i>Fonsecaea nubica</i>              | 0         | -                        |       |
| <i>Fonsecaea pedrosoi</i>            | 0         | -                        |       |
| <i>Phialophora attae</i>             | 0         | -                        |       |
| <i>Rhinochadiella mackenziei</i>     | 0         | -                        |       |
| <i>Aspergillus aculeatus</i>         | 0         | -                        |       |
| <i>Aspergillus bombycis</i>          | 0         | -                        |       |
| <i>Aspergillus clavatus</i>          | 0         | -                        |       |
| <i>Aspergillus fischeri</i>          | 0         | -                        |       |
| <i>Aspergillus flavus</i>            | 0         | -                        |       |
| <i>Aspergillus fumigatus</i>         | 0         | -                        |       |
| <i>Aspergillus glaucus</i>           | 0         | -                        |       |
| <i>Aspergillus nidulans</i>          | 0         | -                        |       |
| <i>Aspergillus niger</i>             | 0         | -                        |       |
| <i>Aspergillus nomius</i>            | 0         | -                        |       |
| <i>Aspergillus oryzae</i>            | 0         | -                        |       |
| <i>Aspergillus terreus</i>           | 0         | -                        |       |
| <i>Penicillium zonata</i>            | 0         | -                        |       |
| <i>Penicillium arizonense</i>        | 0         | -                        |       |
| <i>Penicillium chrysogenum</i>       | 0         | -                        |       |
| <i>Penicillium digitatum</i>         | 0         | -                        |       |
| <i>Penicillium expansum</i>          | 0         | -                        |       |
| <i>Penicillium marneffeii</i>        | 0         | -                        |       |
| <i>Rasamsonia emersonii</i>          | 0         | -                        |       |
| <i>Talaromyces atroroseus</i>        | 0         | -                        |       |
| <i>Talaromyces stipitatus</i>        | 0         | -                        |       |
| <i>Ajellomyces dermatitidis</i>      | 0         | -                        |       |
| <i>Arthroderma otae</i>              | 0         | -                        |       |
| <i>Coccidioides immitis</i>          | 0         | -                        |       |
| <i>Coccidioides posadasii</i>        | 0         | -                        |       |
| <i>Histoplasma capsulatum</i>        | 0         | -                        |       |
| <i>Nannizzia gypsea</i>              | 0         | -                        |       |
| <i>Paracoccidioides brasiliensis</i> | 0         | -                        |       |
| <i>Paracoccidioides lutzii</i>       | 0         | -                        |       |
| <i>Trichophyton benhamiae</i>        | 0         | -                        |       |
| <i>Trichophyton rubrum</i>           | 0         | -                        |       |
| <i>Trichophyton verrucosum</i>       | 0         | -                        |       |
| <i>Uncinocarpus reesii</i>           | 0         | -                        |       |
| <i>Endocarpon pusillum</i>           | 0         | -                        |       |
| <i>Tilletiaria anomala</i>           | 0         | -                        |       |

| Species                             | # L1 hits | Length distribution (bp) | Notes |
|-------------------------------------|-----------|--------------------------|-------|
| <i>Botryotinia fuckeliana</i>       | 0         | -                        |       |
| <i>Glarea lozoyensis</i>            | 0         | -                        |       |
| <i>Marssonina brunnea</i>           | 0         | -                        |       |
| <i>Phialocephala scopiformis</i>    | 0         | -                        |       |
| <i>Sclerotinia sclerotiorum</i>     | 0         | -                        |       |
| <i>Pseudogymnoascus destructans</i> | 0         | -                        |       |
| <i>Pseudogymnoascus verrucosus</i>  | 0         | -                        |       |
| <i>Malassezia globosa</i>           | 0         | -                        |       |
| <i>Malassezia pachydermatis</i>     | 0         | -                        |       |
| <i>Malassezia sympodialis</i>       | 0         | -                        |       |
| <i>Rhodotorula graminis</i>         | 0         | -                        |       |
| <i>Rhodotorula toruloides</i>       | 0         | -                        |       |
| <i>Mixia osmundae</i>               | 0         | -                        |       |
| <i>Arthrobotrys oligospora</i>      | 0         | -                        |       |
| <i>Dactylellina haptotyla</i>       | 0         | -                        |       |
| <i>Tuber melanosporum</i>           | 0         | -                        |       |
| <i>Pneumocystis carinii</i>         | 0         | -                        |       |
| <i>Pneumocystis jirovecii</i>       | 0         | -                        |       |
| <i>Pneumocystis murina</i>          | 0         | -                        |       |
| <i>Melampsora larici-populina</i>   | 0         | -                        |       |
| <i>Puccinia graminis</i>            | 0         | -                        |       |
| <i>Candida albicans</i>             | 0         | -                        |       |
| <i>Candida auris</i>                | 0         | -                        |       |
| <i>Candida dubliniensis</i>         | 0         | -                        |       |
| <i>Candida glabrata</i>             | 0         | -                        |       |
| <i>Candida orthopsilosis</i>        | 0         | -                        |       |
| <i>Candida tanzawaensis</i>         | 0         | -                        |       |
| <i>Candida tenuis</i>               | 0         | -                        |       |
| <i>Candida tropicalis</i>           | 0         | -                        |       |
| <i>Lodderomyces elongisporus</i>    | 0         | -                        |       |
| <i>Ascoidea rubescens</i>           | 0         | -                        |       |
| <i>Babjeviella inositovora</i>      | 0         | -                        |       |
| <i>Clavispora lusitaniae</i>        | 0         | -                        |       |
| <i>Cyberlindnera jadinii</i>        | 0         | -                        |       |
| <i>Debaryomyces fabryi</i>          | 0         | -                        |       |
| <i>Debaryomyces hansenii</i>        | 0         | -                        |       |
| <i>Eremothecium cymbalariae</i>     | 0         | -                        |       |
| <i>Eremothecium gossypii</i>        | 0         | -                        |       |
| <i>Eremothecium sinicaudum</i>      | 0         | -                        |       |
| <i>Hyphopichia burtonii</i>         | 0         | -                        |       |



| Species                               | # L1 hits | Length distribution (bp) | Notes |
|---------------------------------------|-----------|--------------------------|-------|
| <i>Kazachstania africana</i>          | 0         | -                        |       |
| <i>Kazachstania naganishii</i>        | 0         | -                        |       |
| <i>Kluyveromyces lactis</i>           | 0         | -                        |       |
| <i>Kluyveromyces marxianus</i>        | 0         | -                        |       |
| <i>Komagataella phaffii</i>           | 0         | -                        |       |
| <i>Kuraishia capsulata</i>            | 0         | -                        |       |
| <i>Lachancea lanzarotensis</i>        | 0         | -                        |       |
| <i>Lachancea thermotolerans</i>       | 0         | -                        |       |
| <i>Metschnikowia bicuspidata</i>      | 0         | -                        |       |
| <i>Meyerozyma guilliermondii</i>      | 0         | -                        |       |
| <i>Naumovozya castelli</i>            | 0         | -                        |       |
| <i>Naumovozya dairenensis</i>         | 0         | -                        |       |
| <i>Ogataea parapolyomorpha</i>        | 0         | -                        |       |
| <i>Ogataea polymorpha</i>             | 0         | -                        |       |
| <i>Saccharomyces cerevisiae</i>       | 0         | -                        |       |
| <i>Saccharomyces eubayanus</i>        | 0         | -                        |       |
| <i>Spathaspora passalidarum</i>       | 0         | -                        |       |
| <i>Sugiyamaella lignohabitans</i>     | 0         | -                        |       |
| <i>Tetrapisispora blattae</i>         | 0         | -                        |       |
| <i>Tetrapisispora phaffii</i>         | 0         | -                        |       |
| <i>Torulaspora delbrueckii</i>        | 0         | -                        |       |
| <i>Vanderwaltozyma polyspora</i>      | 0         | -                        |       |
| <i>Yarrowia lipolytica</i>            | 0         | -                        |       |
| <i>Zygosaccharomyces rouxii</i>       | 0         | -                        |       |
| <i>Wickerhamomyces anomalus</i>       | 0         | -                        |       |
| <i>Wickerhamomyces ciferrii</i>       | 0         | -                        |       |
| <i>Scheffersomyces stipitis</i>       | 0         | -                        |       |
| <i>Pichia kudriavzevii</i>            | 0         | -                        |       |
| <i>Pichia membranifaciens</i>         | 0         | -                        |       |
| <i>Schizosaccharomyces cryophilus</i> | 0         | -                        |       |
| <i>Schizosaccharomyces japonicus</i>  | 0         | -                        |       |
| <i>Schizosaccharomyces octosporus</i> | 0         | -                        |       |
| <i>Schizosaccharomyces pombe</i>      | 0         | -                        |       |
| <i>Metarhizium acridum</i>            | 0         | -                        |       |
| <i>Metarhizium brunneum</i>           | 0         | -                        |       |
| <i>Metarhizium majus</i>              | 0         | -                        |       |
| <i>Metarhizium robertsii</i>          | 0         | -                        |       |

| Species                               | # L1 hits | Length distribution (bp) | Notes |
|---------------------------------------|-----------|--------------------------|-------|
| <i>Pochonia chlamydosporia</i>        | 0         | -                        |       |
| <i>Beauveria bassiana</i>             | 0         | -                        |       |
| <i>Cordyceps militaris</i>            | 0         | -                        |       |
| <i>Isaria fumosorosea</i>             | 0         | -                        |       |
| <i>Trichoderma atroviride</i>         | 0         | -                        |       |
| <i>Trichoderma gamsii</i>             | 0         | -                        |       |
| <i>Trichoderma reesei</i>             | 0         | -                        |       |
| <i>Trichoderma virens</i>             | 0         | -                        |       |
| <i>Fusarium fujikuroi</i>             | 0         | -                        |       |
| <i>Fusarium graminearum</i>           | 0         | -                        |       |
| <i>Fusarium oxysporum</i>             | 0         | -                        |       |
| <i>Fusarium pseudograminearum</i>     | 0         | -                        |       |
| <i>Fusarium verticillioides</i>       | 0         | -                        |       |
| <i>Nectria haematococca</i>           | 0         | -                        |       |
| <i>Purpureocillium lilacinum</i>      | 0         | -                        |       |
| <i>Colletotrichum fioriniae</i>       | 0         | -                        |       |
| <i>Colletotrichum gloeosporioides</i> | 0         | -                        |       |
| <i>Colletotrichum graminicola</i>     | 0         | -                        |       |
| <i>Colletotrichum higginsianum</i>    | 0         | -                        |       |
| <i>Colletotrichum orchidophilum</i>   | 0         | -                        |       |
| <i>Verticillium alfalfae</i>          | 0         | -                        |       |
| <i>Verticillium dahliae</i>           | 0         | -                        |       |
| <i>Magnaporthe oryzae</i>             | 0         | -                        |       |
| <i>Gaeumannomyces tritici</i>         | 0         | -                        |       |
| <i>Scedosporium apiospermum</i>       | 0         | -                        |       |
| <i>Grosmannia clavigera</i>           | 0         | -                        |       |
| <i>Sporothrix schenckii</i>           | 0         | -                        |       |
| <i>Chaetomium globosum</i>            | 0         | -                        |       |
| <i>Chaetomium thermophilum</i>        | 0         | -                        |       |
| <i>Neurospora crassa</i>              | 0         | -                        |       |
| <i>Neurospora tetrasperma</i>         | 0         | -                        |       |
| <i>Podospora anserina</i>             | 0         | -                        |       |
| <i>Sordaria macrospora</i>            | 0         | -                        |       |
| <i>Thermothelomyces thermophila</i>   | 0         | -                        |       |
| <i>Thielavia terrestris</i>           | 0         | -                        |       |
| <i>Phaeoacremonium minimum</i>        | 0         | -                        |       |
| <i>Eutypa lata</i>                    | 0         | -                        |       |

| Species                                                          | # L1 hits | Length distribution (bp) | Notes |
|------------------------------------------------------------------|-----------|--------------------------|-------|
| <i>Pestalotiopsis fici</i>                                       | 0         | -                        |       |
| <i>Cryptococcus amyloletus</i>                                   | 0         | -                        |       |
| <i>Cryptococcus gattii</i>                                       | 0         | -                        |       |
| <i>Cryptococcus neoformans</i><br><i>var. grubii</i>             | 0         | -                        |       |
| <i>Cryptococcus neoformans</i><br><i>var. neoformans JEC21</i>   | 0         | -                        |       |
| <i>Cryptococcus neoformans</i><br><i>var. neoformans B-3501A</i> | 0         | -                        |       |
| <i>Kockovaella imperatae</i>                                     | 0         | -                        |       |
| <i>Kwoniella bestiolae</i>                                       | 0         | -                        |       |
| <i>Kwoniella dejecticola</i>                                     | 0         | -                        |       |
| <i>Kwoniella mangroviensis</i>                                   | 0         | -                        |       |
| <i>Kwoniella pini</i>                                            | 0         | -                        |       |
| <i>Tremella mesenterica</i>                                      | 0         | -                        |       |
| <i>Tsuchiyaea wingfieldii</i>                                    | 0         | -                        |       |
| <i>Cutaneotrichosporon</i><br><i>oleaginosus</i>                 | 0         | -                        |       |
| <i>Trichosporon asahii</i>                                       | 0         | -                        |       |
| <i>Anthracoystis flocculosa</i>                                  | 0         | -                        |       |
| <i>Kalmanozyma brasiliensis</i>                                  | 0         | -                        |       |
| <i>Moesziomyces antarcticus</i>                                  | 0         | -                        |       |
| <i>Pseudozyma hubeiensis</i>                                     | 0         | -                        |       |
| <i>Ustilago maydis</i>                                           | 0         | -                        |       |
| <i>Wallemia ichthyophaga</i>                                     | 0         | -                        |       |
| <i>Wallemia mellicola</i>                                        | 0         | -                        |       |
| <i>Xylona heveae</i>                                             | 0         | -                        |       |
| <i>Saitoella complicata</i>                                      | 0         | -                        |       |
| <i>Lobosporangium</i><br><i>transversale</i>                     | 0         | -                        |       |
| <i>Phycomyces blakesleeanus</i>                                  | 0         | -                        |       |
| <i>Rhizopus microsporus</i>                                      | 0         | -                        |       |
| <i>Encephalitozoon cuniculi</i>                                  | 0         | -                        |       |
| <i>Encephalitozoon hellem</i>                                    | 0         | -                        |       |
| <i>Encephalitozoon</i><br><i>intestinalis</i>                    | 0         | -                        |       |
| <i>Encephalitozoon romaleae</i>                                  | 0         | -                        |       |
| <i>Enterocytozoon bieneusi</i>                                   | 0         | -                        |       |
| <i>Mitosporidium daphniae</i>                                    | 0         | -                        |       |
| <i>Nematocida parisii</i>                                        | 0         | -                        |       |
| <i>Nosema ceranae</i>                                            | 0         | -                        |       |
| <i>Ordospora colligata</i>                                       | 0         | -                        |       |
| <i>Vavraia culicis</i>                                           | 0         | -                        |       |
| <i>Vittaforma corneae</i>                                        | 0         | -                        |       |
| <b>VIRIDIPLANTAE</b>                                             |           |                          |       |

| Species                                            | # L1 hits | Length distribution (bp) | Notes |
|----------------------------------------------------|-----------|--------------------------|-------|
| <i>Micromonas pusilla</i><br>CCMP1545              | 0         | -                        |       |
| <i>Micromonas sp. RCC299</i>                       | 0         | -                        |       |
| <i>Ostreococcus lucimarinus</i><br>CCE9901         | 0         | -                        |       |
| <i>Ostreococcus tauri</i>                          | 0         | -                        |       |
| <i>Chlamydomonas</i><br><i>reinhardtii</i>         | 0         | -                        |       |
| <i>Volvox carteri</i> f.<br><i>nagariensis</i>     | 0         | -                        |       |
| <i>Chlorella variabilis</i>                        | 0         | -                        |       |
| <i>Auxenochlorella</i><br><i>protothecoides</i>    | 0         | -                        |       |
| <i>Helicosporidium sp.</i><br>ATCC 50920           | 0         | -                        |       |
| <i>Coccomyxa subellipsoidea</i><br>C-169           | 0         | -                        |       |
| <i>Klebsormidium flaccidum</i>                     | 0         | -                        |       |
| <i>Physcomitrella patens</i>                       | 0         | -                        |       |
| <i>Selaginella moellendorffii</i>                  | 0         | -                        |       |
| <i>Pinus taeda</i>                                 | 0         | -                        |       |
| <i>Amborella trichopoda</i>                        | 0         | -                        |       |
| <i>Spirodela polyrhiza</i>                         | 0         | -                        |       |
| <i>Phoenix dactylifera</i>                         | 0         | -                        |       |
| <i>Elaeis oleifera</i>                             | 0         | -                        |       |
| <i>Ensete ventricosum</i>                          | 0         | -                        |       |
| <i>Musa acuminata</i> subsp.<br><i>malaccensis</i> | 0         | -                        |       |
| <i>Sorghum bicolor</i>                             | 0         | -                        |       |
| <i>Zea mays</i>                                    | 0         | -                        |       |
| <i>Setaria italica</i>                             | 0         | -                        |       |
| <i>Brachypodium distachyon</i>                     | 0         | -                        |       |
| <i>Leersia perrieri</i>                            | 0         | -                        |       |
| <i>Oryza barthii</i>                               | 0         | -                        |       |
| <i>Oryza brachyantha</i>                           | 0         | -                        |       |
| <i>Oryza glumipatula</i>                           | 0         | -                        |       |
| <i>Oryza longistaminata</i>                        | 0         | -                        |       |
| <i>Oryza meridionalis</i>                          | 0         | -                        |       |
| <i>Oryza nivara</i>                                | 0         | -                        |       |
| <i>Oryza punctata</i>                              | 0         | -                        |       |
| <i>Oryza sativa Japonica</i><br>Group              | 0         | -                        |       |
| <i>Zizania latifolia</i>                           | 0         | -                        |       |
| <i>Aegilops tauschii</i>                           | 0         | -                        |       |
| <i>Triticum urartu</i>                             | 0         | -                        |       |
| <i>Nelumbo nucifera</i>                            | 0         | -                        |       |

| Species                                                 | # L1 hits | Length distribution (bp) | Notes |
|---------------------------------------------------------|-----------|--------------------------|-------|
| <i>Lupinus angustifolius</i>                            | 0         | -                        |       |
| <i>Phaseolus vulgaris</i>                               | 0         | -                        |       |
| <i>Cajanus cajan</i>                                    | 0         | -                        |       |
| <i>Vigna angularis</i> var.<br><i>angularis</i>         | 0         | -                        |       |
| <i>Vigna radiata</i> var. <i>radiata</i>                | 0         | -                        |       |
| <i>Glycine max</i>                                      | 0         | -                        |       |
| <i>Glycine soja</i>                                     | 0         | -                        |       |
| <i>Cicer arietinum</i>                                  | 0         | -                        |       |
| <i>Medicago truncatula</i>                              | 0         | -                        |       |
| <i>Trifolium pratense</i>                               | 0         | -                        |       |
| <i>Lotus japonicus</i>                                  | 0         | -                        |       |
| <i>Malus x domestica</i>                                | 0         | -                        |       |
| <i>Pyrus x bretschneideri</i>                           | 0         | -                        |       |
| <i>Prunus mume</i>                                      | 0         | -                        |       |
| <i>Prunus persica</i>                                   | 0         | -                        |       |
| <i>Fragaria iinumae</i>                                 | 0         | -                        |       |
| <i>Fragaria nubicola</i>                                | 0         | -                        |       |
| <i>Fragaria orientalis</i>                              | 0         | -                        |       |
| <i>Fragaria vesca</i> subsp.<br><i>vesca</i>            | 0         | -                        |       |
| <i>Fragaria x ananassa</i>                              | 0         | -                        |       |
| <i>Morus notabilis</i>                                  | 0         | -                        |       |
| <i>Cannabis sativa</i>                                  | 0         | -                        |       |
| <i>Castanea mollissima</i>                              | 0         | -                        |       |
| <i>Betula nana</i>                                      | 0         | -                        |       |
| <i>Cucumis melo</i>                                     | 0         | -                        |       |
| <i>Cucumis sativus</i>                                  | 0         | -                        |       |
| <i>Citrullus lanatus</i>                                | 0         | -                        |       |
| <i>Lagenaria siceraria</i>                              | 0         | -                        |       |
| <i>Populus euphratica</i>                               | 0         | -                        |       |
| <i>Populus trichocarpa</i>                              | 0         | -                        |       |
| <i>Jatropha curcas</i>                                  | 0         | -                        |       |
| <i>Manihot esculenta</i> subsp.<br><i>flabellifolia</i> | 0         | -                        |       |
| <i>Ricinus communis</i>                                 | 0         | -                        |       |
| <i>Linum usitatissimum</i>                              | 0         | -                        |       |
| <i>Eucalyptus camaldulensis</i>                         | 0         | -                        |       |
| <i>Eucalyptus grandis</i>                               | 0         | -                        |       |
| <i>Carica papaya</i>                                    | 0         | -                        |       |
| <i>Arabidopsis halleri</i> subsp.<br><i>gemmifera</i>   | 0         | -                        |       |
| <i>Arabidopsis lyrata</i> subsp.<br><i>lyrata</i>       | 0         | -                        |       |
| <i>Arabidopsis thaliana</i>                             | 0         | -                        |       |
| <i>Camelina sativa</i>                                  | 0         | -                        |       |

| Species                                                    | # L1 hits | Length distribution (bp) | Notes |
|------------------------------------------------------------|-----------|--------------------------|-------|
| <i>Capsella rubella</i>                                    | 0         | -                        |       |
| <i>Brassica napus</i>                                      | 0         | -                        |       |
| <i>Brassica oleracea</i> var.<br><i>oleracea</i>           | 0         | -                        |       |
| <i>Brassica rapa</i>                                       | 0         | -                        |       |
| <i>Raphanus raphanistrum</i><br>subsp. <i>raphanistrum</i> | 0         | -                        |       |
| <i>Raphanus sativus</i>                                    | 0         | -                        |       |
| <i>Aethionema arabicum</i>                                 | 0         | -                        |       |
| <i>Arabis alpina</i>                                       | 0         | -                        |       |
| <i>Eutrema parvulum</i>                                    | 0         | -                        |       |
| <i>Eutrema salsugineum</i>                                 | 0         | -                        |       |
| <i>Sisymbrium irio</i>                                     | 0         | -                        |       |
| <i>Leavenworthia alabamica</i>                             | 0         | -                        |       |
| <i>Tarenaya hassleriana</i>                                | 0         | -                        |       |
| <i>Gossypium arboreum</i>                                  | 0         | -                        |       |
| <i>Gossypium raimondii</i>                                 | 0         | -                        |       |
| <i>Theobroma cacao</i>                                     | 0         | -                        |       |
| <i>Aquilaria agallochum</i>                                | 0         | -                        |       |
| <i>Azadirachta indica</i>                                  | 0         | -                        |       |
| <i>Citrus clementine</i>                                   | 0         | -                        |       |
| <i>Citrus sinensis</i>                                     | 0         | -                        |       |
| <i>Vitis vinifera</i>                                      | 0         | -                        |       |
| <i>Amaranthus</i><br><i>hypochondriacus</i>                | 0         | -                        |       |
| <i>Amaranthus tuberculatus</i>                             | 0         | -                        |       |
| <i>Beta vulgaris</i> subsp.<br><i>vulgaris</i>             | 0         | -                        |       |
| <i>Spinacia oleracea</i>                                   | 0         | -                        |       |
| <i>Dianthus caryophyllus</i>                               | 0         | -                        |       |
| <i>Actinidia chinensis</i>                                 | 0         | -                        |       |
| <i>Vaccinium macrocarpon</i>                               | 0         | -                        |       |
| <i>Diospyros lotus</i>                                     | 0         | -                        |       |
| <i>Primula veris</i>                                       | 0         | -                        |       |
| <i>Solanum arcanum</i>                                     | 0         | -                        |       |
| <i>Solanum habrochaites</i>                                | 0         | -                        |       |
| <i>Solanum lycopersicum</i>                                | 0         | -                        |       |
| <i>Solanum melongena</i>                                   | 0         | -                        |       |
| <i>Solanum pennellii</i>                                   | 0         | -                        |       |
| <i>Solanum pimpinellifolium</i>                            | 0         | -                        |       |
| <i>Solanum tuberosum</i>                                   | 0         | -                        |       |
| <i>Capsicum annuum</i>                                     | 0         | -                        |       |
| <i>Nicotiana sylvestris</i>                                | 0         | -                        |       |
| <i>Nicotiana</i><br><i>tomentosiformis</i>                 | 0         | -                        |       |
| <i>Fraginus excelsior</i>                                  | 0         | -                        |       |

| Species                           | # L1 hits | Length distribution (bp) | Notes |
|-----------------------------------|-----------|--------------------------|-------|
| <i>Penstemon centranthifolius</i> | 0         | -                        |       |
| <i>Penstemon grinnellii</i>       | 0         | -                        |       |
| <i>Sesamum indicum</i>            | 0         | -                        |       |
| <i>Genlisea aurea</i>             | 0         | -                        |       |
| <i>Mimulus guttatus</i>           | 0         | -                        |       |
| <i>Conyza canadensis</i>          | 0         | -                        |       |

## Table S4: Genome coverage of L1 and BovB elements

Table S4: Shows the calculations used to generate the bargraph in Fig 1 of the manuscript. BovB and L1 base counts are primarily based on full-length elements. Species that don't have L1s nor BovBs are not listed.

| Species                            | Genome base count | BovB base count, percentage of genome | L1 base count, percentage of genome |
|------------------------------------|-------------------|---------------------------------------|-------------------------------------|
| <b>MAMMALIA</b>                    |                   |                                       |                                     |
| <i>Tachyglossus aculeatus</i>      | 2020007912        | 1452458, 0.0719036%                   | 0, 0%                               |
| <i>Ornithorhynchus anatinus</i>    | 1996811212        | 1830086, 0.0916504%                   | 0, 0%                               |
| <i>Monodelphis domestica</i>       | 3605631728        | 3273062, 0.0907764%                   | 291203623, 8.07636%                 |
| <i>Macropus eugenii</i>            | 3075184024        | 1715506, 0.0557855%                   | 77958311, 2.53508%                  |
| <i>Sarcophilus harrisii</i>        | 3174693010        | 3031341, 0.0954845%                   | 95592375, 3.01107%                  |
| <i>Dasypus novemcinctus</i>        | 3631505655        | 0, 0%                                 | 257879875, 7.10118%                 |
| <i>Choloepus hoffmanni</i>         | 2458927620        | 0, 0%                                 | 145367124, 5.91181%                 |
| <i>Chrysochloris asiatica</i>      | 4210093806        | 108751003, 2.5831%                    | 108660240, 2.58095%                 |
| <i>Echinops telfairi</i>           | 2947007737        | 20606032, 0.699219%                   | 53945548, 1.83052%                  |
| <i>Orycteropus afer</i>            | 4444063711        | 102512334, 2.30673%                   | 196663330, 4.4253%                  |
| <i>Elephantulus edwardii</i>       | 3843982861        | 161028145, 4.1891%                    | 161200386, 4.19358%                 |
| <i>Trichechus manatus</i>          | 3103791524        | 27624301, 0.890018%                   | 198750171, 6.40346%                 |
| <i>Procavia capensis</i>           | 2985258999        | 19116374, 0.640359%                   | 177090807, 5.93218%                 |
| <i>Loxodonta africana</i>          | 3271792967        | 34432824, 1.05241%                    | 313797498, 9.59099%                 |
| <i>Erinaceus europaeus</i>         | 2715703478        | 0, 0%                                 | 80293621, 2.95664%                  |
| <i>Sorex araneus</i>               | 2423158183        | 0, 0%                                 | 79834929, 3.29466%                  |
| <i>Condylura cristata</i>          | 1769662895        | 0, 0%                                 | 42147711, 2.38168%                  |
| <i>Pteropus alecto</i>             | 1985958707        | 112864, 0.0056831%                    | 109229895, 5.50011%                 |
| <i>Pteropus vampyrus</i>           | 1996076410        | 79090, 0.00396227%                    | 67971403, 3.40525%                  |
| <i>Eidolon helvum</i>              | 1837754460        | 100637, 0.00547609%                   | 50920531, 2.7708%                   |
| <i>Megaderma lyra</i>              | 1735931796        | 72504, 0.00417666%                    | 43660935, 2.51513%                  |
| <i>Rhinolophus ferrumequinum</i>   | 1926439238        | 119310, 0.00619329%                   | 50326653, 2.61242%                  |
| <i>Pteronotus parnellii</i>        | 1960317893        | 78360, 0.00399731%                    | 56150083, 2.86434%                  |
| <i>Eptesicus fuscus</i>            | 2026629342        | 58336, 0.00287847%                    | 59441803, 2.93304%                  |
| <i>Myotis brandtii</i>             | 2107242811        | 84290, 0.00400001%                    | 72446482, 3.43798%                  |
| <i>Myotis davidii</i>              | 2059799708        | 71276, 0.00346034%                    | 51012406, 2.47657%                  |
| <i>Myotis lucifugus</i>            | 2034575300        | 87666, 0.00430881%                    | 84847408, 4.17028%                  |
| <i>Ceratotherium simum simum</i>   | 2464350348        | 292804, 0.0118816%                    | 160676871, 6.52005%                 |
| <i>Equus przewalskii</i>           | 2395937679        | 247857, 0.0103449%                    | 135134972, 5.64017%                 |
| <i>Equus caballus Thoroughbred</i> | 2484532062        | 223242, 0.00898527%                   | 191150416, 7.69362%                 |
| <i>Equus caballus Mongolian</i>    | 2377506909        | 265688, 0.0111751%                    | 123172165, 5.18073%                 |
| <i>Manis pentadactyla</i>          | 2204732179        | 0, 0%                                 | 112483171, 5.1019%                  |
| <i>Felis catus</i>                 | 2455541136        | 0, 0%                                 | 163774030, 6.66957%                 |
| <i>Panthera tigris altaica</i>     | 2391065193        | 0, 0%                                 | 155431501, 6.50051%                 |
| <i>Canis lupus familiaris</i>      | 2410960148        | 0, 0%                                 | 163347315, 6.7752%                  |
| <i>Ursus maritimus</i>             | 2301362327        | 0, 0%                                 | 154988843, 6.73466%                 |



| Species                                    | Genome base count | BovB base count, percentage of genome | L1 base count, percentage of genome |
|--------------------------------------------|-------------------|---------------------------------------|-------------------------------------|
| <i>Ailuropoda melanoleuca</i>              | 2299509015        | 0, 0%                                 | 105301329, 4.5793%                  |
| <i>Leptonychotes weddellii</i>             | 3156886159        | 0, 0%                                 | 112493456, 3.56343%                 |
| <i>Odobenus rosmarus divergens</i>         | 2400133628        | 0, 0%                                 | 137079744, 5.71134%                 |
| <i>Mustela putorius furo</i>               | 2410863155        | 0, 0%                                 | 143960591, 5.97133%                 |
| <i>Camelus dromedarius</i>                 | 2004047047        | 0, 0%                                 | 101966754, 5.08804%                 |
| <i>Camelus ferus</i>                       | 2009177929        | 0, 0%                                 | 86491041, 4.3048%                   |
| <i>Vicugna pacos</i>                       | 2172191320        | 0, 0%                                 | 113049718, 5.20441%                 |
| <i>Sus scrofa Duroc</i>                    | 2808509378        | 0, 0%                                 | 176658966, 6.29013%                 |
| <i>Sus scrofa Tibetan</i>                  | 2489155924        | 0, 0%                                 | 134715498, 5.4121%                  |
| <i>Sus scrofa Ellegaard Gottingen</i>      | 2358017222        | 0, 0%                                 | 117750484, 4.99362%                 |
| <i>Balaenoptera acutorostrata scammoni</i> | 2431671281        | 0, 0%                                 | 190619715, 7.83904%                 |
| <i>Physeter catodon</i>                    | 2280711356        | 0, 0%                                 | 146560263, 6.42608%                 |
| <i>Lipotes vexillifer</i>                  | 2429195737        | 0, 0%                                 | 271942192, 11.1947%                 |
| <i>Tursiops truncatus</i>                  | 2551401796        | 0, 0%                                 | 119886176, 4.69884%                 |
| <i>Orcinus orca</i>                        | 2372903489        | 0, 0%                                 | 205346717, 8.65382%                 |
| <i>Pantholops hodgsonii</i>                | 2696869832        | 200623622, 7.43913%                   | 90462265, 3.35434%                  |
| <i>Capra hircus</i>                        | 2635832257        | 225462902, 8.55377%                   | 95239112, 3.61325%                  |
| <i>Ovis aries Texel</i>                    | 2619054388        | 249955158, 9.54372%                   | 108872698, 4.15695%                 |
| <i>Ovis aries musimon</i>                  | 2589834840        | 200496380, 7.74167%                   | 71959650, 2.77854%                  |
| <i>Bubalus bubalis</i>                     | 2836150610        | 286296759, 10.0946%                   | 104875469, 3.69781%                 |
| <i>Bison bison bison</i>                   | 2953606000        | 315448446, 10.6801%                   | 127745325, 4.32506%                 |
| <i>Bos mutus</i>                           | 2645145588        | 217297691, 8.21496%                   | 82289329, 3.11096%                  |
| <i>Bos indicus</i>                         | 2673949103        | 287691777, 10.7591%                   | 110741149, 4.14148%                 |
| <i>Bos taurus</i>                          | 2670422299        | 309871737, 11.6038%                   | 126156398, 4.72421%                 |
| <i>Ochotona princeps</i>                   | 2229824103        | 0, 0%                                 | 34195120, 1.53353%                  |
| <i>Oryctolagus cuniculus</i>               | 2737490501        | 0, 0%                                 | 139192850, 5.08469%                 |
| <i>Ictidomys tridecemlineatus</i>          | 2478393770        | 0, 0%                                 | 107499669, 4.33747%                 |
| <i>Heterocephalus glaber</i>               | 2618188253        | 0, 0%                                 | 155993240, 5.95806%                 |
| <i>Fukomys damarensis</i>                  | 2333892479        | 0, 0%                                 | 161817287, 6.93337%                 |
| <i>Cavia aperea</i>                        | 2716396567        | 0, 0%                                 | 136757020, 5.0345%                  |
| <i>Cavia porcellus</i>                     | 2723219641        | 0, 0%                                 | 235803425, 8.65899%                 |
| <i>Chinchilla lanigera</i>                 | 2390852391        | 0, 0%                                 | 128385455, 5.36986%                 |
| <i>Octodon degus</i>                       | 2995872505        | 0, 0%                                 | 138452612, 4.62145%                 |
| <i>Dipodomys ordii</i>                     | 2158502098        | 0, 0%                                 | 34330234, 1.59047%                  |
| <i>Jaculus jaculus</i>                     | 2835233679        | 0, 0%                                 | 96017503, 3.38658%                  |
| <i>Nannospalax galili</i>                  | 3061408210        | 0, 0%                                 | 136788334, 4.46815%                 |
| <i>Mesocricetus auratus</i>                | 2504908775        | 0, 0%                                 | 80503182, 3.21382%                  |
| <i>Cricetulus griseus</i>                  | 2399770464        | 0, 0%                                 | 79279532, 3.30363%                  |
| <i>Microtus ochrogaster</i>                | 2287340943        | 0, 0%                                 | 52224812, 2.28321%                  |

| Species                               | Genome base count | BovB base count, percentage of genome | L1 base count, percentage of genome |
|---------------------------------------|-------------------|---------------------------------------|-------------------------------------|
| <i>Peromyscus maniculatus bairdii</i> | 2630541020        | 0, 0%                                 | 53188010, 2.02194%                  |
| <i>Rattus norvegicus</i>              | 2909682625        | 0, 0%                                 | 207049946, 7.11589%                 |
| <i>Mus musculus</i>                   | 2730855475        | 0, 0%                                 | 231145319, 8.46421%                 |
| <i>Tupaia belangeri</i>               | 3660774957        | 0, 0%                                 | 51474914, 1.40612%                  |
| <i>Tupaia chinensis</i>               | 2846580235        | 0, 0%                                 | 89655790, 3.1496%                   |
| <i>Galeopterus variegatus</i>         | 3187643824        | 0, 0%                                 | 139985621, 4.39151%                 |
| <i>Otolemur garnettii</i>             | 2519724550        | 0, 0%                                 | 146546821, 5.81599%                 |
| <i>Microcebus murinus</i>             | 2902270736        | 0, 0%                                 | 68180677, 2.34922%                  |
| <i>Tarsius syrichta</i>               | 3453847770        | 0, 0%                                 | 240202647, 6.95464%                 |
| <i>Callithrix jacchus</i>             | 2914958544        | 0, 0%                                 | 246251310, 8.44785%                 |
| <i>Saimiri boliviensis</i>            | 2608572064        | 0, 0%                                 | 179339572, 6.87501%                 |
| <i>Rhinopithecus roxellana</i>        | 2899535590        | 0, 0%                                 | 207691102, 7.16291%                 |
| <i>Nasalis larvatus</i>               | 3011966170        | 0, 0%                                 | 154710505, 5.13653%                 |
| <i>Chlorocebus sabaeus</i>            | 2789639778        | 0, 0%                                 | 204188513, 7.31953%                 |
| <i>Macaca fascicularis</i>            | 2946827162        | 0, 0%                                 | 224863209, 7.63069%                 |
| <i>Macaca mulatta</i>                 | 2969988180        | 0, 0%                                 | 154566974, 5.2043%                  |
| <i>Papio anubis</i>                   | 2948380710        | 0, 0%                                 | 223973218, 7.59648%                 |
| <i>Nomascus leucogenys</i>            | 2962077449        | 0, 0%                                 | 230918510, 7.79583%                 |
| <i>Pongo abelii</i>                   | 3441227734        | 0, 0%                                 | 263895353, 7.66864%                 |
| <i>Gorilla gorilla</i>                | 3029537234        | 0, 0%                                 | 212654289, 7.01937%                 |
| <i>Pan paniscus</i>                   | 2869173508        | 0, 0%                                 | 241958348, 8.43303%                 |
| <i>Pan troglodytes</i>                | 3309577922        | 0, 0%                                 | 243238952, 7.34955%                 |
| <i>Homo sapiens</i>                   | 3101788170        | 0, 0%                                 | 247845149, 7.9904%                  |
| <b>SAUROPSIDA</b>                     |                   |                                       |                                     |
| <i>Apalone spinifera</i>              | 1931078847        | 0, 0%                                 | 1378934, 0.0714074%                 |
| <i>Pelodiscus sinensis</i>            | 2202466388        | 0, 0%                                 | 1581495, 0.0718056%                 |
| <i>Chelonia mydas</i>                 | 2208393880        | 0, 0%                                 | 4027549, 0.182375%                  |
| <i>Chrysemys picta bellii</i>         | 2365749696        | 0, 0%                                 | 3441306, 0.145464%                  |
| <i>Struthio camelus australis</i>     | 1225025301        | 0, 0%                                 | 23472, 0.00191604%                  |
| <i>Tinamus guttatus</i>               | 1047056493        | 0, 0%                                 | 8938, 0.000853631%                  |
| <i>Anas platyrhynchos</i>             | 1105035747        | 0, 0%                                 | 21072, 0.00190691%                  |
| <i>Lyrurus tetrix</i>                 | 657025294         | 0, 0%                                 | 6332, 0.000963738%                  |
| <i>Gallus gallus</i>                  | 1046932099        | 0, 0%                                 | 9721, 0.000928522%                  |
| <i>Coturnix japonica</i>              | 531959683         | 0, 0%                                 | 2234, 0.000419957%                  |
| <i>Meleagris gallopavo</i>            | 1061817101        | 0, 0%                                 | 6761, 0.000636739%                  |
| <i>Colinus virginianus</i>            | 1171855925        | 0, 0%                                 | 62926, 0.00536977%                  |
| <i>Acanthisitta chloris</i>           | 1035876403        | 0, 0%                                 | 25733, 0.00248418%                  |
| <i>Manacus vitellinus</i>             | 1145871783        | 0, 0%                                 | 19832, 0.00173073%                  |
| <i>Zonotrichia albicollis</i>         | 1052600561        | 0, 0%                                 | 12478, 0.00118544%                  |
| <i>Geospiza fortis</i>                | 1065292181        | 0, 0%                                 | 16040, 0.00150569%                  |
| <i>Serinus canaria</i>                | 1152083301        | 0, 0%                                 | 59037, 0.00512437%                  |
| <i>Taeniopygia guttata</i>            | 1233186341        | 0, 0%                                 | 15804, 0.00128156%                  |
| <i>Ficedula albicollis</i>            | 1118326800        | 0, 0%                                 | 16340, 0.00146111%                  |

| Species                                | Genome base count | BovB base count, percentage of genome | L1 base count, percentage of genome |
|----------------------------------------|-------------------|---------------------------------------|-------------------------------------|
| <i>Pseudopodoces humilis</i>           | 1042980823        | 0, 0%                                 | 18864, 0.00180866%                  |
| <i>Corvus brachyrhynchos</i>           | 1091312783        | 0, 0%                                 | 23878, 0.00218801%                  |
| <i>Corvus cornix cornix</i>            | 1049947905        | 0, 0%                                 | 20517, 0.0019541%                   |
| <i>Ara macao</i>                       | 1204683257        | 0, 0%                                 | 18584, 0.00154265%                  |
| <i>Amazona vittata</i>                 | 1175404042        | 0, 0%                                 | 23188, 0.00197277%                  |
| <i>Melopsittacus undulatus</i>         | 1117373619        | 0, 0%                                 | 20189, 0.00180683%                  |
| <i>Nestor notabilis</i>                | 1053559886        | 0, 0%                                 | 26182, 0.0024851%                   |
| <i>Falco cherrug</i>                   | 1174811715        | 0, 0%                                 | 27430, 0.00233484%                  |
| <i>Falco peregrinus</i>                | 1171955363        | 0, 0%                                 | 26702, 0.00227841%                  |
| <i>Cariama cristata</i>                | 1132245425        | 0, 0%                                 | 34112, 0.00301277%                  |
| <i>Merops nubicus</i>                  | 1062961556        | 0, 0%                                 | 23329, 0.00219472%                  |
| <i>Picoides pubescens</i>              | 1167323935        | 0, 0%                                 | 9100, 0.000779561%                  |
| <i>Buceros rhinoceros silvestris</i>   | 1065782791        | 0, 0%                                 | 18845, 0.00176818%                  |
| <i>Apaloderma vittatum</i>             | 1070836417        | 0, 0%                                 | 24052, 0.00224609%                  |
| <i>Leptosomus discolor</i>             | 1136244952        | 0, 0%                                 | 23034, 0.0020272%                   |
| <i>Haliaeetus albicilla</i>            | 1133549865        | 0, 0%                                 | 35410, 0.00312381%                  |
| <i>Haliaeetus leucocephalus</i>        | 1178409481        | 0, 0%                                 | 35701, 0.00302959%                  |
| <i>Aquila chrysaetos canadensis</i>    | 1192725744        | 0, 0%                                 | 33910, 0.00284307%                  |
| <i>Cathartes aura</i>                  | 1152571117        | 0, 0%                                 | 38120, 0.00330739%                  |
| <i>Tyto alba</i>                       | 1120143088        | 0, 0%                                 | 38958, 0.00347795%                  |
| <i>Colinus striatus</i>                | 1075931597        | 0, 0%                                 | 24811, 0.002306%                    |
| <i>Charadrius vociferus</i>            | 1219859583        | 0, 0%                                 | 33056, 0.00270982%                  |
| <i>Balearica regulorum gibbericeps</i> | 1127605500        | 0, 0%                                 | 35488, 0.0031472%                   |
| <i>Chlamydotis macqueenii</i>          | 1086566339        | 0, 0%                                 | 31476, 0.00289683%                  |
| <i>Cuculus canorus</i>                 | 1153894225        | 0, 0%                                 | 19702, 0.00170744%                  |
| <i>Fulmarus glacialis</i>              | 1141395646        | 0, 0%                                 | 35689, 0.00312679%                  |
| <i>Aptenodytes forsteri</i>            | 1254347440        | 0, 0%                                 | 43865, 0.00349704%                  |
| <i>Pygoscelis adeliae</i>              | 1216600033        | 0, 0%                                 | 43236, 0.00355384%                  |
| <i>Phalacrocorax carbo</i>             | 1138967842        | 0, 0%                                 | 29871, 0.00262264%                  |
| <i>Pelecanus crispus</i>               | 1160924693        | 0, 0%                                 | 34119, 0.00293895%                  |
| <i>Nipponia nippon</i>                 | 1223846297        | 0, 0%                                 | 37927, 0.003099%                    |
| <i>Egretta garzetta</i>                | 1206484573        | 0, 0%                                 | 36603, 0.00303386%                  |
| <i>Gavia stellata</i>                  | 1129677294        | 0, 0%                                 | 38510, 0.00340894%                  |
| <i>Tauraco erythrolophus</i>           | 1155540733        | 0, 0%                                 | 27530, 0.00238243%                  |
| <i>Opisthocomus hoazin</i>             | 1203712246        | 0, 0%                                 | 45662, 0.00379343%                  |
| <i>Columba livia</i>                   | 1107971856        | 0, 0%                                 | 28752, 0.00259501%                  |
| <i>Pterocles gutturalis</i>            | 1069324295        | 0, 0%                                 | 32937, 0.00308017%                  |
| <i>Phaethon lepturus</i>               | 1152958507        | 0, 0%                                 | 29672, 0.00257355%                  |
| <i>Calypte anna</i>                    | 1105676412        | 0, 0%                                 | 17154, 0.00155145%                  |
| <i>Chaetura pelagica</i>               | 1119188094        | 0, 0%                                 | 16739, 0.00149564%                  |
| <i>Caprimulgus carolinensis</i>        | 1119683066        | 0, 0%                                 | 32635, 0.00291466%                  |

| Species                            | Genome base count | BovB base count, percentage of genome | L1 base count, percentage of genome |
|------------------------------------|-------------------|---------------------------------------|-------------------------------------|
| <i>Eurypyga helias</i>             | 1088019637        | 0, 0%                                 | 20244, 0.00186063%                  |
| <i>Mesitornis unicolor</i>         | 1087290853        | 0, 0%                                 | 22907, 0.0021068%                   |
| <i>Podiceps cristatus</i>          | 1134922578        | 0, 0%                                 | 23144, 0.00203926%                  |
| <i>Phoenicopterus ruber</i>        | 1132184511        | 0, 0%                                 | 38050, 0.00336076%                  |
| <i>Alligator mississippiensis</i>  | 2174259888        | 0, 0%                                 | 5988372, 0.275421%                  |
| <i>Alligator sinensis</i>          | 2270550999        | 0, 0%                                 | 6999721, 0.308283%                  |
| <i>Crocodylus porosus</i>          | 2120573303        | 0, 0%                                 | 4601841, 0.217009%                  |
| <i>Gavialis gangeticus</i>         | 2188353730        | 0, 0%                                 | 4914507, 0.224576%                  |
| <i>Pogona vitticeps</i>            | 1816116151        | 34892879, 1.92129%                    | 3992505, 0.219838%                  |
| <i>Anolis carolinensis</i>         | 1799143587        | 10307612, 0.572918%                   | 13231926, 0.735457%                 |
| <i>Vipera berus berus</i>          | 1532390814        | 5053647, 0.329788%                    | 4980408, 0.325009%                  |
| <i>Crotalus mitchellii pyrrhus</i> | 1126791715        | 827313, 0.073422%                     | 1914415, 0.1699%                    |
| <i>Ophiophagus hannah</i>          | 1594074654        | 1525335, 0.0956878%                   | 6627163, 0.415737%                  |
| <i>Python bivittatus</i>           | 1435034535        | 3932416, 0.274029%                    | 3913976, 0.272744%                  |
| <b>AMPHIBIA</b>                    |                   |                                       |                                     |
| <i>Xenopus tropicalis</i>          | 1437513269        | 22381, 0.00155692%                    | 10038037, 0.698292%                 |
| <i>Xenopus laevis</i>              | 2718416252        | 24071, 0.000885479%                   | 23728273, 0.872871%                 |
| <i>Nanorana parkeri</i>            | 2053849526        | 39534, 0.00192487%                    | 20631712, 1.00454%                  |
| <b>NEOPTERYGII</b>                 |                   |                                       |                                     |
| <i>Lepisosteus oculatus</i>        | 945861706         | 74445, 0.0078706%                     | 805428, 0.0851528%                  |
| <i>Anguilla anguilla</i>           | 1018701900        | 0, 0%                                 | 1178915, 0.115727%                  |
| <i>Anguilla japonica</i>           | 1151120721        | 0, 0%                                 | 1520279, 0.132069%                  |
| <i>Danio rerio</i>                 | 1412464843        | 20681, 0.00146418%                    | 6341494, 0.448967%                  |
| <i>Astyanax mexicanus</i>          | 1191242572        | 0, 0%                                 | 655594, 0.0550345%                  |
| <i>Oryzias latipes</i>             | 869801494         | 0, 0%                                 | 3737740, 0.429723%                  |
| <i>Poecilia formosa</i>            | 748923461         | 0, 0%                                 | 1514195, 0.202183%                  |
| <i>Xiphophorus maculatus</i>       | 729647787         | 0, 0%                                 | 1081259, 0.148189%                  |
| <i>Fundulus heteroclitus</i>       | 1021882034        | 0, 0%                                 | 2463073, 0.241033%                  |
| <i>Takifugu flavidus</i>           | 378032400         | 0, 0%                                 | 587772, 0.155482%                   |
| <i>Takifugu rubripes</i>           | 391484715         | 0, 0%                                 | 683087, 0.174486%                   |
| <i>Tetraodon nigroviridis</i>      | 358618246         | 0, 0%                                 | 224868, 0.062704%                   |
| <i>Cynoglossus semilaevis</i>      | 470182763         | 6328, 0.00134586%                     | 129721, 0.0275895%                  |
| <i>Haplochromis burtoni</i>        | 831411547         | 0, 0%                                 | 1596803, 0.192059%                  |
| <i>Pundamilia nyererei</i>         | 830133247         | 0, 0%                                 | 1663150, 0.200347%                  |
| <i>Maylandia zebra</i>             | 849595388         | 0, 0%                                 | 1930306, 0.227203%                  |
| <i>Neolamprologus brichardi</i>    | 847893845         | 0, 0%                                 | 1660506, 0.195839%                  |
| <i>Oreochromis niloticus</i>       | 927696114         | 12320, 0.00132802%                    | 3182269, 0.343029%                  |
| <i>Sebastes nigrocinctus</i>       | 687549873         | 0, 0%                                 | 665754, 0.0968299%                  |
| <i>Sebastes rubrivinctus</i>       | 756296653         | 0, 0%                                 | 636171, 0.0841166%                  |
| <i>Gasterosteus aculeatus</i>      | 463354448         | 0, 0%                                 | 416171, 0.089817%                   |
| <i>Gadus morhua</i>                | 824327835         | 0, 0%                                 | 1086653, 0.131823%                  |
| <b>ECDYSOZOA</b>                   |                   |                                       |                                     |
| <i>Ephemera danica</i>             | 475911277         | 6758, 0.00142001%                     | 101494, 0.0213262%                  |

| Species                           | Genome base count | BovB base count, percentage of genome | L1 base count, percentage of genome |
|-----------------------------------|-------------------|---------------------------------------|-------------------------------------|
| <i>Ladona fulva</i>               | 1158111285        | 0, 0%                                 | 448102, 0.0386925%                  |
| <i>Pediculus humanus corporis</i> | 110781312         | 0, 0%                                 | 33247, 0.0300114%                   |
| <i>Frankliniella occidentalis</i> | 415781860         | 0, 0%                                 | 123702, 0.0297517%                  |
| <i>Diaphorina citri</i>           | 485705082         | 44563, 0.00917491%                    | 521323, 0.107333%                   |
| <i>Pachypsylla venusta</i>        | 701763251         | 0, 0%                                 | 90121, 0.0128421%                   |
| <i>Acyrtosiphon pisum</i>         | 541675471         | 0, 0%                                 | 125434, 0.0231567%                  |
| <i>Nilaparvata lugens</i>         | 1140786310        | 150418, 0.0131855%                    | 1477747, 0.129538%                  |
| <i>Oncopeltus fasciatus</i>       | 1098671531        | 0, 0%                                 | 98206, 0.129538%                    |
| <i>Rhodnius prolixus</i>          | 702645054         | 0, 0%                                 | 132347, 0.0188355%                  |
| <i>Cimex lectularius</i>          | 650477627         | 88661, 0.0136301%                     | 312967, 0.0481134%                  |
| <i>Onthophagus taurus</i>         | 270533845         | 0, 0%                                 | 131103, 0.0484608%                  |
| <i>Agrilus planipennis</i>        | 353546665         | 0, 0%                                 | 102367, 0.0289543%                  |
| <i>Tribolium castaneum</i>        | 210248733         | 0, 0%                                 | 29847, 0.014196%                    |
| <i>Anoplophora glabripennis</i>   | 707712193         | 0, 0%                                 | 89797, 0.0126883%                   |
| <i>Leptinotarsa decemlineata</i>  | 1170241964        | 0, 0%                                 | 381273, 0.0325807%                  |
| <i>Dendroctonus ponderosae</i>    | 252847629         | 0, 0%                                 | 93067, 0.0368075%                   |
| <i>Mengenilla moldrzyki</i>       | 155727465         | 0, 0%                                 | 7178, 0.00460933%                   |
| <i>Aedes aegypti</i>              | 1383957531        | 0, 0%                                 | 5075165, 0.366714%                  |
| <i>Culex quinquefasciatus</i>     | 579042118         | 0, 0%                                 | 1308898, 0.226045%                  |
| <i>Anopheles albimanus</i>        | 170508315         | 0, 0%                                 | 20956, 0.0122903%                   |
| <i>Anopheles arabiensis</i>       | 246567867         | 0, 0%                                 | 100922, 0.0409307%                  |
| <i>Anopheles atroparvus</i>       | 224290125         | 0, 0%                                 | 128395, 0.0572451%                  |
| <i>Anopheles christyi</i>         | 172658580         | 0, 0%                                 | 60272, 0.0349082%                   |
| <i>Anopheles culicifacies</i>     | 202998806         | 0, 0%                                 | 142545, 0.0702196%                  |
| <i>Anopheles darlingi</i>         | 136935538         | 0, 0%                                 | 13318, 0.00972574%                  |
| <i>Anopheles dirus</i>            | 216307690         | 0, 0%                                 | 268454, 0.124107%                   |
| <i>Anopheles epiroticus</i>       | 223486714         | 0, 0%                                 | 123461, 0.0552431%                  |
| <i>Anopheles farauti</i>          | 183103254         | 0, 0%                                 | 275859, 0.150658%                   |
| <i>Anopheles funestus</i>         | 225223604         | 0, 0%                                 | 141113, 0.0626546%                  |
| <i>Anopheles gambiae</i>          | 287805703         | 0, 0%                                 | 259922, 0.0903116%                  |
| <i>Anopheles maculatus</i>        | 141894015         | 0, 0%                                 | 66565, 0.0469118%                   |
| <i>Anopheles melas</i>            | 224162116         | 0, 0%                                 | 66478, 0.0296562%                   |
| <i>Anopheles merus</i>            | 288048996         | 0, 0%                                 | 155301, 0.0539148%                  |
| <i>Anopheles minimus</i>          | 201793324         | 0, 0%                                 | 107274, 0.0531603%                  |
| <i>Anopheles quadriannulatus</i>  | 283828998         | 0, 0%                                 | 96223, 0.0339018%                   |
| <i>Anopheles sinensis</i>         | 220777669         | 0, 0%                                 | 86072, 0.0389858%                   |
| <i>Anopheles stephensi</i>        | 221324304         | 0, 0%                                 | 70137, 0.0316897%                   |
| <i>Mayetiola destructor</i>       | 185827756         | 0, 0%                                 | 25099, 0.0135066%                   |
| <i>Lutzomyia longipalpis</i>      | 154229266         | 0, 0%                                 | 11504, 0.00745903%                  |
| <i>Phlebotomus papatasi</i>       | 363767980         | 0, 0%                                 | 44465, 0.0122235%                   |
| <i>Ceratitis capitata</i>         | 484773492         | 0, 0%                                 | 62638, 0.0129211%                   |
| <i>Drosophila albomicans</i>      | 253560284         | 0, 0%                                 | 12982, 0.00511989%                  |

| Species                                       | Genome base count | BovB base count, percentage of genome | L1 base count, percentage of genome |
|-----------------------------------------------|-------------------|---------------------------------------|-------------------------------------|
| <i>Drosophila ananassae</i>                   | 230993012         | 0, 0%                                 | 6612, 0.00286242%                   |
| <i>Drosophila biarmipes</i>                   | 169378599         | 0, 0%                                 | 9683, 0.00571678%                   |
| <i>Drosophila bipectinata</i>                 | 167263958         | 0, 0%                                 | 10275, 0.00614299%                  |
| <i>Drosophila elegans</i>                     | 171267669         | 0, 0%                                 | 7777, 0.00454085%                   |
| <i>Drosophila erecta</i>                      | 152712140         | 0, 0%                                 | 6451, 0.00422429%                   |
| <i>Drosophila eugracilis</i>                  | 156942009         | 0, 0%                                 | 8434, 0.00537396%                   |
| <i>Drosophila ficusphila</i>                  | 152439475         | 0, 0%                                 | 84442, 0.0553938%                   |
| <i>Drosophila grimshawi</i>                   | 200467819         | 0, 0%                                 | 13335, 0.00665194%                  |
| <i>Drosophila kikkawai</i>                    | 164292578         | 0, 0%                                 | 12034, 0.00732474%                  |
| <i>Drosophila melanogaster</i>                | 143706478         | 0, 0%                                 | 4915, 0.00342017%                   |
| <i>Drosophila miranda</i>                     | 136728780         | 0, 0%                                 | 10424, 0.00762385%                  |
| <i>Drosophila mojavensis</i>                  | 193826310         | 0, 0%                                 | 35669, 0.0184026%                   |
| <i>Drosophila persimilis</i>                  | 188374079         | 0, 0%                                 | 7072, 0.00375423%                   |
| <i>Drosophila pseudoobscura pseudoobscura</i> | 152696384         | 0, 0%                                 | 7046, 0.00461439%                   |
| <i>Drosophila rhopaloa</i>                    | 197375704         | 0, 0%                                 | 4465, 0.00226218%                   |
| <i>Drosophila sechellia</i>                   | 166577145         | 0, 0%                                 | 4293, 0.00257718%                   |
| <i>Drosophila simulans</i>                    | 137828247         | 0, 0%                                 | 3689, 0.00267652%                   |
| <i>Drosophila sukukii</i>                     | 232923092         | 0, 0%                                 | 18122, 0.00778025%                  |
| <i>Drosophila takahashii</i>                  | 182106768         | 0, 0%                                 | 7223, 0.00396635%                   |
| <i>Drosophila virilis</i>                     | 206026697         | 0, 0%                                 | 15396, 0.00747282%                  |
| <i>Drosophila willistoni</i>                  | 235516348         | 0, 0%                                 | 8718, 0.00370165%                   |
| <i>Drosophila yakuba</i>                      | 165693946         | 0, 0%                                 | 7898, 0.00476662%                   |
| <i>Musca domestica</i>                        | 750403944         | 0, 0%                                 | 65208, 0.00868972%                  |
| <i>Glossina austeni</i>                       | 370264922         | 0, 0%                                 | 47253, 0.0127619%                   |
| <i>Glossina brevipalpis</i>                   | 315360362         | 0, 0%                                 | 59919, 0.0190002%                   |
| <i>Glossina fuscipes fuscipes</i>             | 374774708         | 0, 0%                                 | 49182, 0.0131231%                   |
| <i>Glossina morsitans morsitans</i>           | 363107242         | 0, 0%                                 | 48753, 0.0134266%                   |
| <i>Glossina pallidipes</i>                    | 357332231         | 0, 0%                                 | 36772, 0.0102907%                   |
| <i>Limnephilus lunatus</i>                    | 1345859447        | 0, 0%                                 | 43713, 0.00324796%                  |
| <i>Papilio glaucus</i>                        | 374815656         | 179060, 0.0477728%                    | 68581, 0.0182973%                   |
| <i>Papilio polytes</i>                        | 227005758         | 0, 0%                                 | 10239, 0.00451046%                  |
| <i>Papilio xuthus</i>                         | 243890167         | 0, 0%                                 | 33700, 0.0138177%                   |
| <i>Heliconius melpomene</i>                   | 273786188         | 10600, 0.00387163%                    | 5968, 0.0021798%                    |
| <i>Melitaea cinxia</i>                        | 389892349         | 0, 0%                                 | 13137, 0.00336939%                  |
| <i>Danaus plexippus</i>                       | 272853388         | 20020, 0.00733727%                    | 18718, 0.00686009%                  |
| <i>Bombyx mori</i>                            | 481803763         | 435424, 0.0903737%                    | 1615213, 0.335243%                  |
| <i>Manduca sexta</i>                          | 419412261         | 31594, 0.00753292%                    | 26668, 0.00635842%                  |
| <i>Plutella xylostella</i>                    | 393454548         | 28327, 0.00719956%                    | 209156, 0.0531589%                  |
| <i>Athalia rosae</i>                          | 163837890         | 0, 0%                                 | 13934, 0.00850475%                  |
| <i>Cephus cinctus</i>                         | 162226239         | 0, 0%                                 | 33326, 0.0205429%                   |
| <i>Orussus abietinus</i>                      | 201220334         | 0, 0%                                 | 18324, 0.00910644%                  |

| Species                             | Genome base count | BovB base count, percentage of genome | L1 base count, percentage of genome |
|-------------------------------------|-------------------|---------------------------------------|-------------------------------------|
| <i>Ceratosolen solmsi marchali</i>  | 277059195         | 0, 0%                                 | 68603, 0.0247611%                   |
| <i>Nasonia giraulti</i>             | 283606953         | 0, 0%                                 | 17238, 0.00607813%                  |
| <i>Nasonia longicornis</i>          | 285726340         | 0, 0%                                 | 14085, 0.00492954%                  |
| <i>Nasonia vitripennis</i>          | 295780872         | 0, 0%                                 | 28451, 0.00961895%                  |
| <i>Copidosoma floridanum</i>        | 555044930         | 0, 0%                                 | 80844, 0.0145653%                   |
| <i>Trichogramma pretiosum</i>       | 196221301         | 0, 0%                                 | 37097, 0.0189057%                   |
| <i>Microplitis demolitor</i>        | 250525215         | 0, 0%                                 | 133621, 0.0533363%                  |
| <i>Megachile rotundata</i>          | 272660569         | 0, 0%                                 | 83736, 0.0307107%                   |
| <i>Apis dorsata</i>                 | 230340171         | 0, 0%                                 | 11849, 0.00514413%                  |
| <i>Apis florea</i>                  | 230467781         | 0, 0%                                 | 11235, 0.00487487%                  |
| <i>Apis mellifera</i>               | 250270657         | 0, 0%                                 | 12542, 0.00501137%                  |
| <i>Bombus impatiens</i>             | 249185056         | 0, 0%                                 | 43105, 0.0172984%                   |
| <i>Bombus terrestris</i>            | 248654244         | 0, 0%                                 | 20613, 0.00828982%                  |
| <i>Linepithema humile</i>           | 219500750         | 6510, 0.00296582%                     | 34557, 0.0157435%                   |
| <i>Camponotus floridanus</i>        | 232685334         | 0, 0%                                 | 27476, 0.0118082%                   |
| <i>Acromyrmex echinator</i>         | 295944863         | 0, 0%                                 | 21595, 0.00729697%                  |
| <i>Atta cephalotes</i>              | 317671980         | 0, 0%                                 | 14002, 0.00440769%                  |
| <i>Solenopsis invicta</i>           | 396009169         | 28437, 0.00718089%                    | 31306, 0.00790537%                  |
| <i>Pogonomyrmex barbatus</i>        | 235645958         | 4063, 0.0017242%                      | 10237, 0.00434423%                  |
| <i>Harpegnathos saltator</i>        | 294465601         | 0, 0%                                 | 78553, 0.0266765%                   |
| <i>Cerapachys biroi</i>             | 212825769         | 0, 0%                                 | 21905, 0.0102925%                   |
| <i>Blattella germanica</i>          | 2037201033        | 0, 0%                                 | 2091710, 0.102676%                  |
| <i>Zootermopsis nevadensis</i>      | 485009472         | 0, 0%                                 | 64328, 0.0132632%                   |
| <i>Locusta migratoria</i>           | 5759798599        | 2236765, 0.0388341%                   | 7904827, 0.137241%                  |
| <i>Daphnia pulex</i>                | 197206209         | 0, 0%                                 | 270547, 0.13719%                    |
| <i>Eurytemora affinis</i>           | 494890867         | 0, 0%                                 | 290790, 0.0587584%                  |
| <i>Lepeophtheirus salmonis</i>      | 665129626         | 0, 0%                                 | 12393542, 1.86333%                  |
| <i>Hyaella azteca</i>               | 1178848281        | 0, 0%                                 | 100730, 0.00854478%                 |
| <i>Strigamia maritima</i>           | 176210797         | 0, 0%                                 | 64283, 0.0364807%                   |
| <i>Stegodyphus mimosarum</i>        | 2738704917        | 0, 0%                                 | 1142876, 0.0417305%                 |
| <i>Latrodectus hesperus</i>         | 1137104656        | 0, 0%                                 | 236269, 0.0207781%                  |
| <i>Parasteatoda tepidariorum</i>    | 1443909906        | 0, 0%                                 | 139984, 0.00969479%                 |
| <i>Tetranychus urticae</i>          | 90815494          | 0, 0%                                 | 34385, 0.0378625%                   |
| <i>Dermatophagoides farinae</i>     | 53545338          | 0, 0%                                 | 4466, 0.0083406%                    |
| <i>Sarcoptes scabiei type canis</i> | 56262437          | 0, 0%                                 | 16880, 0.0300023%                   |
| <i>Achipteria coleoptrata</i>       | 88443889          | 0, 0%                                 | 9799, 0.0110793%                    |
| <i>Hypochthonius rufulus</i>        | 172365132         | 0, 0%                                 | 11855, 0.00687784%                  |
| <i>Platynothrhus peltifer</i>       | 100532934         | 0, 0%                                 | 12889, 0.0128207%                   |
| <i>Steganacarus magnus</i>          | 113565242         | 0, 0%                                 | 20382, 0.0179474%                   |
| <i>Ixodes ricinus</i>               | 391986416         | 0, 0%                                 | 914108, 0.233199%                   |
| <i>Ixodes scapularis</i>            | 1765382190        | 0, 0%                                 | 2014997, 0.114139%                  |
| <i>Rhipicephalus microplus</i>      | 144692238         | 0, 0%                                 | 181040, 0.125121%                   |

| Species                               | Genome base count | BovB base count, percentage of genome | L1 base count, percentage of genome |
|---------------------------------------|-------------------|---------------------------------------|-------------------------------------|
| <i>Metaseiulus occidentalis</i>       | 151699350         | 0, 0%                                 | 72727, 0.0479415%                   |
| <i>Varroa destructor</i>              | 294133941         | 0, 0%                                 | 3597, 0.00122291%                   |
| <i>Centruroides exilicauda</i>        | 926399729         | 184507, 0.0199166%                    | 855306, 0.0923258%                  |
| <i>Mesobuthus martensii</i>           | 925546267         | 524438, 0.0566625%                    | 396089, 0.0427952%                  |
| <i>Limulus polyphemus</i>             | 1828256766        | 0, 0%                                 | 496277, 0.0271448%                  |
| <i>Trichinella spiralis</i>           | 63525422          | 0, 0%                                 | 8033, 0.0126453%                    |
| <i>Ascaris suum</i>                   | 269559681         | 0, 0%                                 | 30473, 0.0113047%                   |
| <i>Steinernema monticolum</i>         | 89158954          | 0, 0%                                 | 17504, 0.0196324%                   |
| <i>Panagrellus redivivus</i>          | 65093147          | 0, 0%                                 | 13032, 0.0200205%                   |
| <i>Haemonchus contortus</i>           | 319757902         | 0, 0%                                 | 352460, 0.110227%                   |
| <i>Necator americanus</i>             | 244075060         | 0, 0%                                 | 29269, 0.0119918%                   |
| <i>Heterorhabditis bacteriophora</i>  | 76974349          | 0, 0%                                 | 244, 0.000316989%                   |
| <i>Caenorhabditis angaria</i>         | 79761545          | 0, 0%                                 | 7885, 0.00988572%                   |
| <i>Caenorhabditis brenneri</i>        | 190369721         | 0, 0%                                 | 38619, 0.0202863%                   |
| <i>Caenorhabditis briggsae</i>        | 108478526         | 0, 0%                                 | 7158, 0.00659854%                   |
| <i>Caenorhabditis elegans</i>         | 100272607         | 0, 0%                                 | 5988, 0.00597172%                   |
| <i>Caenorhabditis japonica</i>        | 166256191         | 0, 0%                                 | 41298, 0.02484%                     |
| <i>Caenorhabditis sp. 11 MAF-2010</i> | 79321433          | 0, 0%                                 | 5899, 0.00743683%                   |
| <i>Priapululus caudatus</i>           | 420178403         | 0, 0%                                 | 179152, 0.0426371%                  |
| <b>PLATYHELMINTHES</b>                |                   |                                       |                                     |
| <i>Schistosoma curassoni</i>          | 344202215         | 0, 0%                                 | 63816, 0.0185403%                   |
| <i>Schistosoma haematobium</i>        | 375894156         | 0, 0%                                 | 42415, 0.0112838%                   |
| <i>Schistosoma japonicum</i>          | 402743189         | 0, 0%                                 | 94449, 0.0234514%                   |
| <i>Schistosoma mansoni</i>            | 364518427         | 0, 0%                                 | 18207, 0.00499481%                  |
| <i>Schistosoma margrebowiei</i>       | 367396528         | 0, 0%                                 | 30287, 0.00824368%                  |
| <i>Schistosoma mattheei</i>           | 340818150         | 0, 0%                                 | 52043, 0.01527%                     |
| <i>Schistosoma rodhaini</i>           | 343294136         | 0, 0%                                 | 29809, 0.00868322%                  |
| <i>Clonorchis sinensis</i>            | 547288241         | 0, 0%                                 | 137669, 0.0251548%                  |
| <i>Echinococcus granulosus</i>        | 112350571         | 0, 0%                                 | 4822, 0.00429192%                   |
| <i>Echinococcus multilocularis</i>    | 7371474           | 0, 0%                                 | 4135, 0.0560946%                    |
| <i>Hymenolepis microstoma</i>         | 126773784         | 0, 0%                                 | 5297, 0.00417831%                   |
| <i>Protopolystoma xenopodis</i>       | 617344661         | 0, 0%                                 | 28573, 0.00462837%                  |
| <b>OTHER</b>                          |                   |                                       |                                     |
| <i>Callorhynchus milii</i>            | 974481817         | 0, 0%                                 | 96001, 0.00985149%                  |
| <i>Carcharhinus brachyurus</i>        | 2832541493        | 0, 0%                                 | 1383347, 0.0488377%                 |
| <i>Lytechinus variegatus</i>          | 951759914         | 4192, 0.000440447%                    | 1562525, 0.164172%                  |
| <i>Strongylocentrotus purpuratus</i>  | 936564995         | 55567, 0.00593306%                    | 2699297, 0.288212%                  |
| <i>Patiria miniata</i>                | 811028858         | 0, 0%                                 | 350468, 0.0432128%                  |
| <i>Saccoglossus kowalevskii</i>       | 775840678         | 0, 0%                                 | 2440029, 0.314501%                  |
| <i>Ciona intestinalis</i>             | 115212710         | 0, 0%                                 | 78094, 0.0677825%                   |



| Species                                        | Genome base count | BovB base count, percentage of genome | L1 base count, percentage of genome |
|------------------------------------------------|-------------------|---------------------------------------|-------------------------------------|
| <i>Ciona savignyi</i>                          | 587352817         | 29071, 0.0049495%                     | 4044971, 0.688678%                  |
| <i>Botryllus schlosseri</i>                    | 579633380         | 0, 0%                                 | 1256055, 0.216698%                  |
| <i>Oikopleura dioica</i>                       | 70471451          | 0, 0%                                 | 5276, 0.00748672%                   |
| <i>Branchiostoma floridae</i>                  | 521895125         | 0, 0%                                 | 884348, 0.169449%                   |
| <i>Lethenteron camtschaticum</i>               | 1030662718        | 27180, 0.00263714%                    | 1011092, 0.0981012%                 |
| <i>Petromyzon marinus</i>                      | 885550958         | 0, 0%                                 | 680080, 0.0767974%                  |
| <i>Latimeria chalumnae</i>                     | 2860591921        | 113934, 0.00398288%                   | 14770485, 0.516344%                 |
| <i>Adineta vaga</i>                            | 217933776         | 32135, 0.0147453%                     | 44968, 0.0206338%                   |
| <i>Capitella teleta</i>                        | 333283208         | 9147, 0.00274451%                     | 17739, 0.0053225%                   |
| <i>Helobdella robusta</i>                      | 235376169         | 139023, 0.0590642%                    | 400522, 0.170163%                   |
| <i>Crassostrea gigas</i>                       | 557717710         | 0, 0%                                 | 1746428, 0.313138%                  |
| <i>Lottia gigantea</i>                         | 359505668         | 0, 0%                                 | 628379, 0.17479%                    |
| <i>Aplysia californica</i>                     | 927296314         | 0, 0%                                 | 645572, 0.0696187%                  |
| <i>Biomphalaria glabrata</i>                   | 916374414         | 0, 0%                                 | 335123, 0.0365705%                  |
| <i>Nematostella vectensis</i>                  | 356613585         | 0, 0%                                 | 186002, 0.0521579%                  |
| <i>Hydra vulgaris</i>                          | 852155112         | 0, 0%                                 | 1764624, 0.207078%                  |
| <i>Mnemiopsis leidyi</i>                       | 155865547         | 0, 0%                                 | 60221, 0.0386365%                   |
| <i>Trichoplax adhaerens</i>                    | 105631681         | 0, 0%                                 | 0, 0%                               |
| <i>Amphimedon queenslandica</i>                | 166679601         | 0, 0%                                 | 7730, 0.00463764%                   |
| <b>FUNGI</b>                                   |                   |                                       |                                     |
| <i>Coprinopsis cinerea</i>                     | 36192590          | 0, 0%                                 | 7417, 0.0204931%                    |
| <i>Agaricus bisporus</i> var. <i>burnettii</i> | 32614392          | 0, 0%                                 | 31084, 0.0953076%                   |
| <i>Agaricus bisporus</i> var. <i>bisporus</i>  | 30233745          | 0, 0%                                 | 28062, 0.0928168%                   |
| <i>Laccaria bicolor</i>                        | 64877444          | 0, 0%                                 | 4236, 0.00652923%                   |
| <i>Schizophyllum commune</i>                   | 38482026          | 0, 0%                                 | 5965, 0.0155007%                    |
| <i>Moniliophthora roreri</i>                   | 52204869          | 0, 0%                                 | 4106, 0.00786517%                   |
| <i>Serpula lacrymans</i>                       | 42797233          | 0, 0%                                 | 0, 0%                               |
| <i>Coniophora puteana</i>                      | 42968544          | 0, 0%                                 | 15013, 0.0349395%                   |
| <i>Heterobasidion irregulare</i>               | 33649967          | 0, 0%                                 | 10227, 0.0303923%                   |
| <i>Stereum hirsutum</i>                        | 46511623          | 0, 0%                                 | 11201, 0.0240822%                   |
| <i>Dichomitus squalens</i>                     | 42748430          | 0, 0%                                 | 10461, 0.0244711%                   |
| <i>Trametes versicolor</i>                     | 44794008          | 0, 0%                                 | 90802, 0.20271%                     |
| <i>Fibroporia radiculosa</i>                   | 28378039          | 0, 0%                                 | 770, 0.00271337%                    |
| <i>Phanerochaete carnosae</i>                  | 46293325          | 0, 0%                                 | 18096, 0.0390899%                   |
| <i>Postia placenta</i>                         | 90891856          | 0, 0%                                 | 8820, 0.00970384%                   |
| <i>Gloeophyllum trabeum</i>                    | 37178225          | 0, 0%                                 | 20507, 0.0551586%                   |
| <i>Punctularia strigosozonata</i>              | 34171901          | 0, 0%                                 | 44534, 0.130323%                    |
| <i>Fomitiporia mediterranea</i>                | 63354419          | 0, 0%                                 | 1142, 0.00180256%                   |
| <i>Auricularia subglabra</i>                   | 74920202          | 0, 0%                                 | 195051, 0.260345%                   |

| Species                               | Genome base count | BovB base count, percentage of genome | L1 base count, percentage of genome |
|---------------------------------------|-------------------|---------------------------------------|-------------------------------------|
| <i>Malassezia sympodialis</i>         | 7669689           | 0, 0%                                 | 3964, 0.051684%                     |
| <i>Ustilago maydis</i>                | 19664356          | 0, 0%                                 | 2996, 0.0152357%                    |
| <i>Puccinia graminis</i>              | 88724376          | 0, 0%                                 | 752, 0.000847569%                   |
| <i>Melampsora larici-populina</i>     | 101129028         | 0, 0%                                 | 10131, 0.0100179%                   |
| <i>Rhodotorula toruloides</i>         | 20223942          | 0, 0%                                 | 2537, 0.0125445%                    |
| <i>Dactylellina haptotyla</i>         | 39531920          | 0, 0%                                 | 1802, 0.00455834%                   |
| <i>Tuber melanosporum</i>             | 124945702         | 0, 0%                                 | 2089, 0.00167193%                   |
| <i>Talaromyces atrovirens</i>         | 30858562          | 0, 0%                                 | 1589, 0.0051493%                    |
| <i>Talaromyces stipitatus</i>         | 35685443          | 0, 0%                                 | 6125, 0.0171639%                    |
| <i>Ajellomyces dermatitidis</i>       | 75404732          | 0, 0%                                 | 24833, 0.0329329%                   |
| <i>Histoplasma capsulatum</i>         | 33030326          | 0, 0%                                 | 1442, 0.00436569%                   |
| <i>Arthroderma otae</i>               | 23263091          | 0, 0%                                 | 318, 0.00136697%                    |
| <i>Coccidioides immitis</i>           | 29016019          | 0, 0%                                 | 3321, 0.0114454%                    |
| <i>Paracoccidioides brasiliensis</i>  | 29952540          | 0, 0%                                 | 1357, 0.0045305%                    |
| <i>Uncinocarpus reesii</i>            | 22349738          | 0, 0%                                 | 1552, 0.00694415%                   |
| <i>Endocarpon pusillum</i>            | 37130611          | 0, 0%                                 | 2963, 0.00797994%                   |
| <i>Pseudogymnoascus destructans</i>   | 30684937          | 0, 0%                                 | 5229, 0.0170409%                    |
| <i>Beauveria bassiana</i>             | 33697794          | 0, 0%                                 | 1795, 0.00532676%                   |
| <i>Fusarium oxysporum</i>             | 61386934          | 0, 0%                                 | 5556, 0.00905079%                   |
| <i>Fusarium verticillioides</i>       | 41844914          | 0, 0%                                 | 1292, 0.00308759%                   |
| <i>Colletotrichum gloeosporioides</i> | 55607143          | 0, 0%                                 | 1235, 0.00222094%                   |
| <i>Colletotrichum higginsianum</i>    | 50716103          | 0, 0%                                 | 4418, 0.00871124%                   |
| <i>Colletotrichum orchidophilum</i>   | 48556462          | 0, 0%                                 | 2174, 0.00447726%                   |
| <i>Thermothelomyces thermophila</i>   | 38744216          | 0, 0%                                 | 1081, 0.00279009%                   |
| <i>Thielavia terrestris</i>           | 36912256          | 0, 0%                                 | 3957, 0.01072%                      |
| <i>Sordaria macrospora</i>            | 39955017          | 0, 0%                                 | 1025, 0.00256538%                   |
| <i>Pseudocercospora fijiensis</i>     | 74141167          | 0, 0%                                 | 18239, 0.0246004%                   |
| <i>Sphaerulina musiva</i>             | 29352103          | 0, 0%                                 | 1589, 0.00541358%                   |
| <i>Zymoseptoria tritici</i>           | 39686251          | 0, 0%                                 | 7312, 0.0184245%                    |
| <i>Parastagonospora nodorum</i>       | 37213987          | 0, 0%                                 | 3811, 0.0102408%                    |
| <i>Leptosphaeria maculans</i>         | 45124619          | 0, 0%                                 | 20091, 0.0445234%                   |
| <i>Metschnikowia bicuspidata</i>      | 16055203          | 0, 0%                                 | 1926, 0.0119961%                    |
| <i>Scheffersomyces stipitis</i>       | 15441179          | 0, 0%                                 | 70712, 0.457944%                    |
| <i>Candida albicans</i>               | 14282666          | 0, 0%                                 | 10100, 0.0707151%                   |
| <i>Candida auris</i>                  | 12498763          | 0, 0%                                 | 2327, 0.0186178%                    |
| <i>Candida dubliniensis</i>           | 14618422          | 0, 0%                                 | 33605, 0.229881%                    |

| Species                                  | Genome base count | BovB base count, percentage of genome | L1 base count, percentage of genome |
|------------------------------------------|-------------------|---------------------------------------|-------------------------------------|
| <i>Candida tanzawaensis</i>              | 13136204          | 0, 0%                                 | 1844, 0.0140375%                    |
| <i>Wickerhamomyces anomalus</i>          | 14145566          | 0, 0%                                 | 5054, 0.0357285%                    |
| <i>Wickerhamomyces ciferrii</i>          | 15901152          | 0, 0%                                 | 13860, 0.0871635%                   |
| <i>Yarrowia lipolytica</i>               | 20550897          | 0, 0%                                 | 84838, 0.412819%                    |
| <i>Saitoella complicata</i>              | 14136186          | 0, 0%                                 | 2291, 0.0162066%                    |
| <i>Phycomyces blakesleeanus</i>          | 53939167          | 0, 0%                                 | 335552, 0.622093%                   |
| <i>Rhizopus microsporus</i>              | 25972395          | 0, 0%                                 | 45192, 0.174%                       |
| <i>Lobosporangium transversale</i>       | 42768949          | 0, 0%                                 | 35232, 0.0823775%                   |
| <i>Nosema ceranae</i>                    | 7860219           | 0, 0%                                 | 912, 0.0116027%                     |
| <b>VIRIDIPLANTAE</b>                     |                   |                                       |                                     |
| <i>Chlamydomonas reinhardtii</i>         | 120185366         | 0, 0%                                 | 606792, 0.50488%                    |
| <i>Volvox carteri f. nagariensis</i>     | 137684403         | 0, 0%                                 | 396743, 0.288154%                   |
| <i>Chlorella variabilis</i>              | 46159512          | 0, 0%                                 | 12154, 0.0263304%                   |
| <i>Coccomyxa subellipsoidea C-169</i>    | 48826616          | 0, 0%                                 | 342720, 0.701912%                   |
| <i>Klebsormidium flaccidum</i>           | 103921766         | 0, 0%                                 | 14535, 0.0139865%                   |
| <i>Physcomitrella patens</i>             | 479985347         | 0, 0%                                 | 209444, 0.0436355%                  |
| <i>Selaginella moellendorffii</i>        | 212315224         | 0, 0%                                 | 432326, 0.203625%                   |
| <i>Pinus taeda</i>                       | 265480119         | 0, 0%                                 | 3355235, 1.26384%                   |
| <i>Amborella trichopoda</i>              | 706332640         | 0, 0%                                 | 10079924, 1.42708%                  |
| <i>Spirodela polyrhiza</i>               | 132009443         | 0, 0%                                 | 217054, 0.164423%                   |
| <i>Phoenix dactylifera</i>               | 555607186         | 0, 0%                                 | 4794765, 0.862977%                  |
| <i>Elaeis oleifera</i>                   | 1402725009        | 0, 0%                                 | 4644120, 0.331078%                  |
| <i>Ensete ventricosum</i>                | 172241963         | 0, 0%                                 | 45089, 0.0261777%                   |
| <i>Musa acuminata subsp. malaccensis</i> | 472235617         | 0, 0%                                 | 861006, 0.182326%                   |
| <i>Sorghum bicolor</i>                   | 738540932         | 0, 0%                                 | 6065256, 0.821248%                  |
| <i>Zea mays</i>                          | 2066912289        | 0, 0%                                 | 9490541, 0.459165%                  |
| <i>Setaria italica</i>                   | 405737341         | 0, 0%                                 | 4216652, 1.03926%                   |
| <i>Brachypodium distachyon</i>           | 271923306         | 0, 0%                                 | 4154965, 1.52799%                   |
| <i>Leersia perrieri</i>                  | 266687832         | 0, 0%                                 | 2368362, 0.888065%                  |
| <i>Oryza barthii</i>                     | 308272304         | 0, 0%                                 | 2043982, 0.663044%                  |
| <i>Oryza brachyantha</i>                 | 259907595         | 0, 0%                                 | 570749, 0.219597%                   |
| <i>Oryza glumipatula</i>                 | 372860283         | 0, 0%                                 | 1891897, 0.507401%                  |
| <i>Oryza longistaminata</i>              | 326442508         | 0, 0%                                 | 1729078, 0.529673%                  |
| <i>Oryza meridionalis</i>                | 335668232         | 0, 0%                                 | 1621453, 0.483052%                  |
| <i>Oryza nivara</i>                      | 337950324         | 0, 0%                                 | 2024556, 0.599069%                  |
| <i>Oryza punctata</i>                    | 393816603         | 0, 0%                                 | 1970705, 0.500412%                  |
| <i>Oryza sativa Japonica group</i>       | 382150945         | 0, 0%                                 | 2353016, 0.615729%                  |

| Species                                              | Genome base count | BovB base count, percentage of genome | L1 base count, percentage of genome |
|------------------------------------------------------|-------------------|---------------------------------------|-------------------------------------|
| <i>Zizania latifolia</i>                             | 603989347         | 0, 0%                                 | 2151532, 0.35622%                   |
| <i>Aegilops tauschii</i>                             | 3313650219        | 0, 0%                                 | 21648619, 0.653316%                 |
| <i>Triticum urartu</i>                               | 3747047519        | 0, 0%                                 | 21997415, 0.58706%                  |
| <i>Nelumbo nucifera</i>                              | 804484421         | 0, 0%                                 | 19049323, 2.36789%                  |
| <i>Lupinus angustifolius</i>                         | 523297923         | 0, 0%                                 | 3311489, 0.632811%                  |
| <i>Phaseolus vulgaris</i>                            | 521076696         | 0, 0%                                 | 5674591, 1.08901%                   |
| <i>Cajanus cajan</i>                                 | 510809477         | 0, 0%                                 | 1658557, 0.324692%                  |
| <i>Vigna angularis</i> var. <i>angularis</i>         | 291823841         | 0, 0%                                 | 58656, 0.0200998%                   |
| <i>Vigna radiata</i> var. <i>radiata</i>             | 463085359         | 0, 0%                                 | 91202, 0.0196944%                   |
| <i>Glycine max</i>                                   | 973224514         | 0, 0%                                 | 7291899, 0.749251%                  |
| <i>Glycine soja</i>                                  | 863568428         | 0, 0%                                 | 5855382, 0.678045%                  |
| <i>Cicer arietinum</i>                               | 530768543         | 0, 0%                                 | 864712, 0.162917%                   |
| <i>Medicago truncatula</i>                           | 314353944         | 0, 0%                                 | 2757877, 0.877316%                  |
| <i>Trifolium pratense</i>                            | 304979311         | 0, 0%                                 | 1723289, 0.565051%                  |
| <i>Lotus japonicus</i>                               | 147812252         | 0, 0%                                 | 1521949, 1.02965%                   |
| <i>Malus x domestica</i>                             | 526197889         | 0, 0%                                 | 2239129, 0.42553%                   |
| <i>Pyrus x bretschneideri</i>                        | 508550595         | 0, 0%                                 | 2367713, 0.465581%                  |
| <i>Prunus mume</i>                                   | 233872527         | 0, 0%                                 | 1080390, 0.461957%                  |
| <i>Prunus persica</i>                                | 227251827         | 0, 0%                                 | 977650, 0.430206%                   |
| <i>Fragaria iinumae</i>                              | 199627509         | 0, 0%                                 | 848595, 0.425089%                   |
| <i>Fragaria nubicola</i>                             | 203686407         | 0, 0%                                 | 852989, 0.418776%                   |
| <i>Fragaria orientalis</i>                           | 214184023         | 0, 0%                                 | 861282, 0.402122%                   |
| <i>Fragaria vesca</i> subsp. <i>vesca</i>            | 214217322         | 0, 0%                                 | 1330049, 0.620888%                  |
| <i>Fragaria x ananassa</i>                           | 173229572         | 0, 0%                                 | 576965, 0.333064%                   |
| <i>Morus notabilis</i>                               | 320378613         | 0, 0%                                 | 540366, 0.168665%                   |
| <i>Cannabis sativa</i>                               | 757438891         | 0, 0%                                 | 7007555, 0.925164%                  |
| <i>Castanea mollissima</i>                           | 833240550         | 0, 0%                                 | 7968700, 0.95635%                   |
| <i>Betula nana</i>                                   | 564011153         | 0, 0%                                 | 4178216, 0.740804%                  |
| <i>Cucumis melo</i>                                  | 374772472         | 0, 0%                                 | 1244169, 0.33198%                   |
| <i>Cucumis sativus</i>                               | 242977439         | 0, 0%                                 | 799120, 0.328887%                   |
| <i>Citrullus lanatus</i>                             | 321046825         | 0, 0%                                 | 1165484, 0.363026%                  |
| <i>Lagenaria siceraria</i>                           | 176727258         | 0, 0%                                 | 507954, 0.287423%                   |
| <i>Populus euphratica</i>                            | 495875768         | 0, 0%                                 | 1763571, 0.355648%                  |
| <i>Populus trichocarpa</i>                           | 417129638         | 0, 0%                                 | 1895269, 0.45436%                   |
| <i>Jatropha curcas</i>                               | 318363250         | 0, 0%                                 | 1992515, 0.625862%                  |
| <i>Manihot esculenta</i> subsp. <i>flabellifolia</i> | 390835892         | 0, 0%                                 | 1771302, 0.453209%                  |
| <i>Ricinus communis</i>                              | 350458699         | 0, 0%                                 | 664578, 0.189631%                   |
| <i>Linum usitatissimum</i>                           | 282201865         | 0, 0%                                 | 2053058, 0.727514%                  |
| <i>Eucalyptus camaldulensis</i>                      | 654922307         | 0, 0%                                 | 5906037, 0.901792%                  |
| <i>Eucalyptus grandis</i>                            | 691269672         | 0, 0%                                 | 10125615, 1.46479%                  |
| <i>Carica papaya</i>                                 | 369781828         | 0, 0%                                 | 2516437, 0.680519%                  |

| Species                                                 | Genome base count | BovB base count, percentage of genome | L1 base count, percentage of genome |
|---------------------------------------------------------|-------------------|---------------------------------------|-------------------------------------|
| <i>Arabidopsis halleri</i> subsp. <i>gemmifera</i>      | 221139660         | 0, 0%                                 | 2629722, 1.18917%                   |
| <i>Arabidopsis lyrata</i> subsp. <i>lyrata</i>          | 206667935         | 0, 0%                                 | 3211589, 1.55399%                   |
| <i>Arabidopsis thaliana</i>                             | 119146348         | 0, 0%                                 | 907867, 0.761976%                   |
| <i>Camelina sativa</i>                                  | 641356059         | 0, 0%                                 | 13704182, 2.13675%                  |
| <i>Capsella rubella</i>                                 | 133063876         | 0, 0%                                 | 1196138, 0.89892%                   |
| <i>Brassica napus</i>                                   | 930121500         | 0, 0%                                 | 19061867, 2.0494%                   |
| <i>Brassica rapa</i>                                    | 283975909         | 0, 0%                                 | 5186525, 1.8264%                    |
| <i>Brassica oleracea</i> var. <i>oleracea</i>           | 488593889         | 0, 0%                                 | 10794431, 2.20928%                  |
| <i>Raphanus raphanistrum</i> subsp. <i>raphanistrum</i> | 253833977         | 0, 0%                                 | 3953706, 1.5576%                    |
| <i>Raphanus sativus</i>                                 | 341476849         | 0, 0%                                 | 6558491, 1.92063%                   |
| <i>Aethionema arabicum</i>                              | 192487774         | 0, 0%                                 | 2497220, 1.29734%                   |
| <i>Arabis alpina</i>                                    | 308032609         | 0, 0%                                 | 6413649, 2.08213%                   |
| <i>Eutrema parvulum</i>                                 | 137073209         | 0, 0%                                 | 1218003, 0.888578%                  |
| <i>Eutrema salsugineum</i>                              | 243110105         | 0, 0%                                 | 3730545, 1.53451%                   |
| <i>Sisymbrium irio</i>                                  | 245550082         | 0, 0%                                 | 3420058, 1.39281%                   |
| <i>Leavenworthia alabamica</i>                          | 173431618         | 0, 0%                                 | 1145977, 0.660766%                  |
| <i>Tarenaya hassleriana</i>                             | 249929577         | 0, 0%                                 | 898531, 0.359514%                   |
| <i>Gossypium arboreum</i>                               | 1560831891        | 0, 0%                                 | 5673504, 0.363492%                  |
| <i>Gossypium raimondii</i>                              | 761405269         | 0, 0%                                 | 6287854, 0.825822%                  |
| <i>Theobroma cacao</i>                                  | 345993675         | 0, 0%                                 | 2489010, 0.71938%                   |
| <i>Aquilaria agallochum</i>                             | 726710453         | 0, 0%                                 | 2696090, 0.370999%                  |
| <i>Azadirachta indica</i>                               | 261457759         | 0, 0%                                 | 450277, 0.172218%                   |
| <i>Citrus clementina</i>                                | 301364702         | 0, 0%                                 | 2772560, 0.920002%                  |
| <i>Citrus sinensis</i>                                  | 327669411         | 0, 0%                                 | 2960816, 0.903599%                  |
| <i>Vitis vinifera</i>                                   | 485326422         | 0, 0%                                 | 10020983, 2.06479%                  |
| <i>Amaranthus hypochondriacus</i>                       | 502147592         | 0, 0%                                 | 1858411, 0.370093%                  |
| <i>Amaranthus tuberculatus</i>                          | 4347977           | 0, 0%                                 | 47856, 1.10065%                     |
| <i>Beta vulgaris</i> subsp. <i>vulgaris</i>             | 566198563         | 0, 0%                                 | 14816651, 2.61686%                  |
| <i>Spinacia oleracea</i>                                | 474077292         | 0, 0%                                 | 4811255, 1.01487%                   |
| <i>Dianthus caryophyllus</i>                            | 567661845         | 0, 0%                                 | 3994415, 0.703661%                  |
| <i>Actinidia chinensis</i>                              | 604217145         | 0, 0%                                 | 1447675, 0.239595%                  |
| <i>Vaccinium macrocarpon</i>                            | 414621889         | 0, 0%                                 | 2174742, 0.524512%                  |
| <i>Diospyros lotus</i>                                  | 1104189           | 0, 0%                                 | 3332, 0.30176%                      |
| <i>Primula veris</i>                                    | 309692940         | 0, 0%                                 | 1089758, 0.351883%                  |
| <i>Solanum arcanum</i>                                  | 665186956         | 0, 0%                                 | 5259355, 0.790658%                  |
| <i>Solanum habrochaites</i>                             | 724284658         | 0, 0%                                 | 5928289, 0.818503%                  |
| <i>Solanum lycopersicum</i>                             | 781353311         | 0, 0%                                 | 5086040, 0.650927%                  |
| <i>Solanum melongena</i>                                | 833080760         | 0, 0%                                 | 5215063, 0.625997%                  |

| Species                           | Genome base count | BovB base count, percentage of genome | L1 base count, percentage of genome |
|-----------------------------------|-------------------|---------------------------------------|-------------------------------------|
| <i>Solanum pennellii</i>          | 720458090         | 0, 0%                                 | 5173838, 0.718132%                  |
| <i>Solanum pimpinellifolium</i>   | 688247059         | 0, 0%                                 | 5291330, 0.768813%                  |
| <i>Solanum tuberosum</i>          | 705779115         | 0, 0%                                 | 7014366, 0.993847%                  |
| <i>Capsicum annuum</i>            | 3063642317        | 0, 0%                                 | 18450182, 0.60223%                  |
| <i>Nicotiana sylvestris</i>       | 2221831232        | 0, 0%                                 | 12836977, 0.577766%                 |
| <i>Nicotiana tomentosiformis</i>  | 1688312294        | 0, 0%                                 | 9735272, 0.576627%                  |
| <i>Fraxinus excelsior</i>         | 875243685         | 0, 0%                                 | 2738111, 0.31284%                   |
| <i>Penstemon centranthifolius</i> | 4471593           | 0, 0%                                 | 24561, 0.549267%                    |
| <i>Penstemon grinnellii</i>       | 3663524           | 0, 0%                                 | 14843, 0.405156%                    |
| <i>Sesamum indicum</i>            | 274906174         | 0, 0%                                 | 4526917, 1.64671%                   |
| <i>Genlisea aurea</i>             | 43357795          | 0, 0%                                 | 124160, 0.286361%                   |
| <i>Mimulus guttatus</i>           | 321641293         | 0, 0%                                 | 2116247, 0.657953%                  |
| <i>Conyza canadensis</i>          | 326165195         | 0, 0%                                 | 1471338, 0.451102%                  |

## Table S5: BovB HT candidate clusters

Table S5: BLASTALL and VSEARCH were used to find BovB HT candidates. Clusters were kept if they contained L1s from two or more different Eukaryotic Classes and passed the *in silico* validation tests. The clustering was run three times: first, using nucleotide BovB sequences between 2.4-4kb in length; second, using nucleotide open reading frames found within BovBs; and third, using amino acid reverse-transcriptase domains only. See Methods for details.

| Family                           | Number of BovBs from each species                                                                                                                                                                                                                                                                                                                                                                                                                                                                                                                                                                                                                                                                                                                                                                  | Eukaryotic Classes                                                                                                 | Eukaryotic Phyla                     |
|----------------------------------|----------------------------------------------------------------------------------------------------------------------------------------------------------------------------------------------------------------------------------------------------------------------------------------------------------------------------------------------------------------------------------------------------------------------------------------------------------------------------------------------------------------------------------------------------------------------------------------------------------------------------------------------------------------------------------------------------------------------------------------------------------------------------------------------------|--------------------------------------------------------------------------------------------------------------------|--------------------------------------|
| <b>Nucleotide BovB sequences</b> |                                                                                                                                                                                                                                                                                                                                                                                                                                                                                                                                                                                                                                                                                                                                                                                                    |                                                                                                                    |                                      |
| <b>CROSS-PHYLUM clusters</b>     |                                                                                                                                                                                                                                                                                                                                                                                                                                                                                                                                                                                                                                                                                                                                                                                                    |                                                                                                                    |                                      |
| c_0                              | 135 <i>Anolis carolinensis</i> , 14504 <i>Bison bison</i> , 1 <i>Bombyx mori</i> , 18932 <i>Bos indicus</i> , 5335 <i>Bos mutus</i> , 20798 <i>Bos taurus</i> , 11603 <i>Bubalus bubalis</i> , 5827 <i>Capra hircus</i> , 2 <i>Centruroides exilicauda</i> , 1 <i>Cimex lectularius</i> , 1 <i>Ciona savignyi</i> , 1 <i>Cynoglossus semilaevis</i> , 1 <i>Helobdella robusta</i> , 1 <i>Latimeria chalumnae</i> , 10 <i>Locusta migratoria</i> , 19 <i>Macropus eugenii</i> , 8 <i>Mesobuthus martensii</i> , 20 <i>Monodelphis domestica</i> , 7 <i>Ophiophagus hannah</i> , 8178 <i>Ovis aries</i> Texel, 6315 <i>Ovis aries musimon</i> , 3026 <i>Pantholops hodgsonii</i> , 308 <i>Pogona vitticeps</i> , 5 <i>Python bivittatus</i> , 36 <i>Sarcophilus harrisi</i> , 21 <i>Vipera berus</i> | Actinopterygii,<br>Arachnida,<br>Ascidiacea,<br>Clitellata,<br>Insecta,<br>Mammalia,<br>Reptilia,<br>Sarcopterygii | Annelida,<br>Arthropoda,<br>Chordata |
| c_1                              | 197 <i>Chrysochloris asiatica</i> , 86 <i>Echinops telfairi</i> , 478 <i>Elephantulus edwardii</i> , 136 <i>Loxodonta africana</i> , 1 <i>Mesobuthus martensii</i> , 7724 <i>Orycteropus afer</i> , 576 <i>Procavia capensis</i> , 79 <i>Trichechus manatus</i>                                                                                                                                                                                                                                                                                                                                                                                                                                                                                                                                    | Arachnida,<br>Mammalia                                                                                             | Arthropoda,<br>Chordata              |
| c_21                             | 2912 <i>Chrysochloris asiatica</i> , 43 <i>Echinops telfairi</i> , 41 <i>Elephantulus edwardii</i> , 3 <i>Helobdella robusta</i> , 30 <i>Loxodonta africana</i> , 2 <i>Mesobuthus martensii</i> , 40 <i>Orycteropus afer</i> , 65 <i>Procavia capensis</i> , 25 <i>Trichechus manatus</i>                                                                                                                                                                                                                                                                                                                                                                                                                                                                                                          | Arachnida,<br>Clitellata,<br>Mammalia                                                                              | Annelida,<br>Arthropoda,<br>Chordata |
| c_23                             | 3 <i>Crotalus mitchellii</i> , 1 <i>Danio rerio</i> , 2 <i>Helobdella robusta</i> , 3 <i>Lepisosteus oculatus</i> , 1 <i>Mesobuthus martensii</i> , 4 <i>Ophiophagus hannah</i> , 29 <i>Python bivittatus</i>                                                                                                                                                                                                                                                                                                                                                                                                                                                                                                                                                                                      | Actinopterygii,<br>Arachnida,<br>Clitellata,<br>Reptilia                                                           | Annelida,<br>Arthropoda,<br>Chordata |
| c_33                             | 2 <i>Adineta vaga</i> , 6 <i>Python bivittatus</i>                                                                                                                                                                                                                                                                                                                                                                                                                                                                                                                                                                                                                                                                                                                                                 | Bdelloidea,<br>Reptilia                                                                                            | Chordata,<br>Rotifera                |
| c_4                              | 7 <i>Chrysochloris asiatica</i> , 443 <i>Elephantulus edwardii</i> , 1 <i>Mesobuthus martensii</i> , 3 <i>Orycteropus afer</i>                                                                                                                                                                                                                                                                                                                                                                                                                                                                                                                                                                                                                                                                     | Arachnida,<br>Mammalia                                                                                             | Arthropoda,<br>Chordata              |
| c_41                             | 2 <i>Centruroides exilicauda</i> , 1 <i>Locusta migratoria</i> , 54 <i>Macropus eugenii</i> , 51 <i>Monodelphis domestica</i> , 1 <i>Pogona vitticeps</i> , 96 <i>Sarcophilus harrisi</i>                                                                                                                                                                                                                                                                                                                                                                                                                                                                                                                                                                                                          | Arachnida,<br>Insecta,<br>Mammalia,<br>Reptilia                                                                    | Arthropoda,<br>Chordata              |
| c_46                             | 3 <i>Ciona savignyi</i> , 4 <i>Strongylocentrotus purpuratus</i>                                                                                                                                                                                                                                                                                                                                                                                                                                                                                                                                                                                                                                                                                                                                   | Ascidiacea,<br>Echinoidea                                                                                          | Chordata,<br>Echinodermata           |
| c_53                             | 6 <i>Centruroides exilicauda</i> , 1 <i>Crotalus mitchellii</i> , 2 <i>Ophiophagus hannah</i>                                                                                                                                                                                                                                                                                                                                                                                                                                                                                                                                                                                                                                                                                                      | Arachnida,<br>Reptilia                                                                                             | Arthropoda,<br>Chordata              |
| c_55                             | 1 <i>Adineta vaga</i> , 1 <i>Helobdella robusta</i>                                                                                                                                                                                                                                                                                                                                                                                                                                                                                                                                                                                                                                                                                                                                                | Bdelloidea,<br>Clitellata                                                                                          | Annelida,<br>Rotifera                |

| Family | Number of BovBs from each species                                                                                                                                                                                                                                                                                                                                                                                                              | Eukaryotic Classes                | Eukaryotic Phyla        |
|--------|------------------------------------------------------------------------------------------------------------------------------------------------------------------------------------------------------------------------------------------------------------------------------------------------------------------------------------------------------------------------------------------------------------------------------------------------|-----------------------------------|-------------------------|
| c_7    | 61 <i>Anolis carolinensis</i> , 1593 <i>Bison bison</i> , 1151 <i>Bos indicus</i> , 1301 <i>Bos mutus</i> , 1192 <i>Bos taurus</i> , 1488 <i>Bubalus bubalis</i> , 1117 <i>Capra hircus</i> , 2 <i>Locusta migratoria</i> , 1 <i>Macropus eugenii</i> , 1021 <i>Ovis aries Texel</i> , 1040 <i>Ovis aries musimon</i> , 800 <i>Pantholops hodgsonii</i> , 100 <i>Pogona vitticeps</i> , 1 <i>Sarcophilus harrisii</i> , 11 <i>Vipera berus</i> | Insecta,<br>Mammalia,<br>Reptilia | Arthropoda,<br>Chordata |

#### CROSS-CLASS clusters

|       |                                                                                                                                                                                                                                                                                                                                                                                                                                                                                 |                       |            |
|-------|---------------------------------------------------------------------------------------------------------------------------------------------------------------------------------------------------------------------------------------------------------------------------------------------------------------------------------------------------------------------------------------------------------------------------------------------------------------------------------|-----------------------|------------|
| c_106 | 36 <i>Bison bison</i> , 8 <i>Bos indicus</i> , 28 <i>Bos mutus</i> , 15 <i>Bos taurus</i> , 44 <i>Bubalus bubalis</i> , 18 <i>Capra hircus</i> , 19 <i>Ovis aries Texel</i> , 14 <i>Ovis aries musimon</i> , 20 <i>Pantholops hodgsonii</i> , 2 <i>Pogona vitticeps</i>                                                                                                                                                                                                         | Mammalia,<br>Reptilia | Chordata   |
| c_14  | 5 <i>Anolis carolinensis</i> , 1425 <i>Bison bison</i> , 1373 <i>Bos indicus</i> , 1566 <i>Bos mutus</i> , 1553 <i>Bos taurus</i> , 1519 <i>Bubalus bubalis</i> , 1390 <i>Capra hircus</i> , 11 <i>Ophiophagus hannah</i> , 1440 <i>Ovis aries Texel</i> , 1343 <i>Ovis aries musimon</i> , 1319 <i>Pantholops hodgsonii</i> , 398 <i>Pogona vitticeps</i> , 1 <i>Sarcophilus harrisii</i> , 53 <i>Vipera berus</i>                                                             | Mammalia,<br>Reptilia | Chordata   |
| c_15  | 22 <i>Ceratotherium simum</i> , 22 <i>Equus caballus Mongolian</i> , 22 <i>Equus caballus Thoroughbred</i> , 24 <i>Equus przewalskii</i> , 1 <i>Megaderma lyra</i> , 4 <i>Pogona vitticeps</i> , 2 <i>Rhinolophus ferrumequinum</i>                                                                                                                                                                                                                                             | Mammalia,<br>Reptilia | Chordata   |
| c_19  | 1332 <i>Bison bison</i> , 1321 <i>Bos indicus</i> , 700 <i>Bos mutus</i> , 1371 <i>Bos taurus</i> , 1285 <i>Bubalus bubalis</i> , 830 <i>Capra hircus</i> , 810 <i>Ovis aries Texel</i> , 603 <i>Ovis aries musimon</i> , 272 <i>Pantholops hodgsonii</i> , 1 <i>Vipera berus</i>                                                                                                                                                                                               | Mammalia,<br>Reptilia | Chordata   |
| c_2   | 2 <i>Anolis carolinensis</i> , 2674 <i>Bison bison</i> , 2088 <i>Bos indicus</i> , 1778 <i>Bos mutus</i> , 2061 <i>Bos taurus</i> , 2380 <i>Bubalus bubalis</i> , 1424 <i>Capra hircus</i> , 4 <i>Macropus eugenii</i> , 1 <i>Monodelphis domestica</i> , 10 <i>Ophiophagus hannah</i> , 1250 <i>Ovis aries Texel</i> , 1573 <i>Ovis aries musimon</i> , 1194 <i>Pantholops hodgsonii</i> , 154 <i>Pogona vitticeps</i> , 1 <i>Sarcophilus harrisii</i> , 6 <i>Vipera berus</i> | Mammalia,<br>Reptilia | Chordata   |
| c_49  | 6 <i>Diaphorina citri</i> , 1 <i>Mesobuthus martensii</i> , 1 <i>Nilaparvata lugens</i>                                                                                                                                                                                                                                                                                                                                                                                         | Arachnida,<br>Insecta | Arthropoda |
| c_5   | 354 <i>Bison bison</i> , 78 <i>Bos indicus</i> , 287 <i>Bos mutus</i> , 65 <i>Bos taurus</i> , 343 <i>Bubalus bubalis</i> , 143 <i>Capra hircus</i> , 80 <i>Ovis aries Texel</i> , 265 <i>Ovis aries musimon</i> , 134 <i>Pantholops hodgsonii</i> , 1 <i>Pogona vitticeps</i>                                                                                                                                                                                                  | Mammalia,<br>Reptilia | Chordata   |
| c_80  | 1 <i>Centruroides exilicauda</i> , 1 <i>Mesobuthus martensii</i> , 2 <i>Nilaparvata lugens</i>                                                                                                                                                                                                                                                                                                                                                                                  | Arachnida,<br>Insecta | Arthropoda |

#### Nucleotide ORFs

#### CROSS-PHYLUM clusters



| Family | Number of BovBs from each species                                                                                                                                                                                                                                                                                                                                                                                                                                                                                                                                                                                                                                                                                                                                                                                                              | Eukaryotic Classes                                                                               | Eukaryotic Phyla                                  |
|--------|------------------------------------------------------------------------------------------------------------------------------------------------------------------------------------------------------------------------------------------------------------------------------------------------------------------------------------------------------------------------------------------------------------------------------------------------------------------------------------------------------------------------------------------------------------------------------------------------------------------------------------------------------------------------------------------------------------------------------------------------------------------------------------------------------------------------------------------------|--------------------------------------------------------------------------------------------------|---------------------------------------------------|
| o_0    | 11 <i>Adineta vaga</i> , 245 <i>Anolis carolinensis</i> , 59268 <i>Bos indicus</i> , 15219 <i>Bos mutus</i> , 63518 <i>Bos taurus</i> , 29581 <i>Bubalus bubalis</i> , 8688 <i>Capra hircus</i> , 6 <i>Centruroides exilicauda</i> , 1 <i>Chrysochloris asiatica</i> , 5 <i>Cimex lectularius</i> , 2 <i>Helobdella robusta</i> , 1 <i>Lepisosteus oculatus</i> , 53 <i>Locusta migratoria</i> , 1 <i>Loxodonta africana</i> , 8 <i>Macropus eugenii</i> , 6 <i>Mesobuthus martensii</i> , 3 <i>Monodelphis domestica</i> , 17 <i>Ophiophagus hannah</i> , 24910 <i>Ovis aries Texel</i> , 15373 <i>Ovis aries musimon</i> , 7554 <i>Pantholops hodgsonii</i> , 1177 <i>Pogona vitticeps</i> , 2 <i>Procavia capensis</i> , 34 <i>Python bivittatus</i> , 1 <i>Sarcophilus harrisi</i> , 1 <i>Trichechus manatus</i> , 424 <i>Vipera berus</i> | Actinopterygii,<br>Arachnida,<br>Bdelloidea,<br>Clitellata,<br>Insecta,<br>Mammalia,<br>Reptilia | Annelida,<br>Arthropoda,<br>Chordata,<br>Rotifera |
| o_106  | 2 <i>Centruroides exilicauda</i> , 5 <i>Lethenteron camtschaticum</i>                                                                                                                                                                                                                                                                                                                                                                                                                                                                                                                                                                                                                                                                                                                                                                          | Arachnida,<br>Hyperoartia                                                                        | Arthropoda,<br>Chordata                           |
| o_120  | 1 <i>Bison bison</i> , 2 <i>Bos indicus</i> , 2 <i>Bos taurus</i> , 1 <i>Bubalus bubalis</i> , 2 <i>Capra hircus</i> , 5 <i>Cimex lectularius</i> , 2 <i>Locusta migratoria</i> , 6 <i>Ophiophagus hannah</i> , 1 <i>Ovis aries Texel</i> , 2 <i>Pantholops hodgsonii</i> , 3825 <i>Pogona vitticeps</i> , 257 <i>Vipera berus</i>                                                                                                                                                                                                                                                                                                                                                                                                                                                                                                             | Insecta,<br>Mammalia,<br>Reptilia                                                                | Arthropoda,<br>Chordata                           |
| o_122  | 1 <i>Anolis carolinensis</i> , 275 <i>Bison bison</i> , 260 <i>Bos indicus</i> , 282 <i>Bos mutus</i> , 251 <i>Bos taurus</i> , 297 <i>Bubalus bubalis</i> , 239 <i>Capra hircus</i> , 2 <i>Cimex lectularius</i> , 9 <i>Ophiophagus hannah</i> , 223 <i>Ovis aries Texel</i> , 246 <i>Ovis aries musimon</i> , 214 <i>Pantholops hodgsonii</i> , 1 <i>Python bivittatus</i> , 61 <i>Vipera berus</i>                                                                                                                                                                                                                                                                                                                                                                                                                                          | Insecta,<br>Mammalia,<br>Reptilia                                                                | Arthropoda,<br>Chordata                           |
| o_16   | 4 <i>Ephemera danica</i> , 1 <i>Myotis brandtii</i>                                                                                                                                                                                                                                                                                                                                                                                                                                                                                                                                                                                                                                                                                                                                                                                            | Insecta,<br>Mammalia                                                                             | Arthropoda,<br>Chordata                           |
| o_326  | 1 <i>Bos indicus</i> , 1 <i>Cimex lectularius</i> , 18 <i>Ophiophagus hannah</i> , 2 <i>Pogona vitticeps</i> , 1 <i>Python bivittatus</i> , 348 <i>Vipera berus</i>                                                                                                                                                                                                                                                                                                                                                                                                                                                                                                                                                                                                                                                                            | Insecta,<br>Mammalia,<br>Reptilia                                                                | Arthropoda,<br>Chordata                           |
| o_33   | 4 <i>Danio rerio</i> , 13 <i>Helobdella robusta</i> , 1 <i>Lepisosteus oculatus</i> , 16 <i>Mesobuthus martensii</i>                                                                                                                                                                                                                                                                                                                                                                                                                                                                                                                                                                                                                                                                                                                           | Actinopterygii,<br>Arachnida,<br>Clitellata                                                      | Annelida,<br>Arthropoda,<br>Chordata              |
| o_38   | 6 <i>Anolis carolinensis</i> , 2 <i>Bos indicus</i> , 2 <i>Bos mutus</i> , 3 <i>Bos taurus</i> , 2 <i>Capra hircus</i> , 3 <i>Locusta migratoria</i> , 2 <i>Ophiophagus hannah</i> , 5 <i>Pantholops hodgsonii</i> , 3305 <i>Pogona vitticeps</i> , 6 <i>Python bivittatus</i> , 14 <i>Vipera berus</i>                                                                                                                                                                                                                                                                                                                                                                                                                                                                                                                                        | Insecta,<br>Mammalia,<br>Reptilia                                                                | Arthropoda,<br>Chordata                           |
| o_43   | 198 <i>Chrysochloris asiatica</i> , 18 <i>Echinops telfairi</i> , 71 <i>Elephantulus edwardii</i> , 399 <i>Loxodonta africana</i> , 1 <i>Mesobuthus martensii</i> , 1981 <i>Orycteropus afer</i> , 129 <i>Procavia capensis</i> , 410 <i>Trichechus manatus</i>                                                                                                                                                                                                                                                                                                                                                                                                                                                                                                                                                                                | Arachnida,<br>Mammalia                                                                           | Arthropoda,<br>Chordata                           |
| o_47   | 1 <i>Bison bison</i> , 1 <i>Capra hircus</i> , 10 <i>Cimex lectularius</i> , 1 <i>Crotalus mitchellii</i> , 49 <i>Ophiophagus hannah</i> , 1 <i>Ovis aries musimon</i> , 1 <i>Pantholops hodgsonii</i> , 24 <i>Pogona vitticeps</i> , 8 <i>Python bivittatus</i> , 813 <i>Vipera berus</i>                                                                                                                                                                                                                                                                                                                                                                                                                                                                                                                                                     | Insecta,<br>Mammalia,<br>Reptilia                                                                | Arthropoda,<br>Chordata                           |
| o_609  | 1 <i>Lepisosteus oculatus</i> , 4 <i>Mesobuthus martensii</i>                                                                                                                                                                                                                                                                                                                                                                                                                                                                                                                                                                                                                                                                                                                                                                                  | Actinopterygii,<br>Arachnida                                                                     | Arthropoda,<br>Chordata                           |

| Family | Number of BovBs from each species                                                                                                                                                                                                                                                                                   | Eukaryotic Classes                | Eukaryotic Phyla        |
|--------|---------------------------------------------------------------------------------------------------------------------------------------------------------------------------------------------------------------------------------------------------------------------------------------------------------------------|-----------------------------------|-------------------------|
| o_95   | 2 Anolis carolinensis, 2944 Bison bison, 1982 Bos indicus, 974 Bos mutus, 2002 Bos taurus, 1685 Bubalus bubalis, 883 Capra hircus, 1 Cimex lectularius, 1 Monodelphis domestica, 1 Ophiophagus hannah, 1535 Ovis aries Texel, 1150 Ovis aries musimon, 623 Pantholops hodgsonii, 1 Pogona vitticeps, 8 Vipera berus | Insecta,<br>Mammalia,<br>Reptilia | Arthropoda,<br>Chordata |

**CROSS-CLASS clusters**

|       |                                                                                                                                                                                                                           |                                |          |
|-------|---------------------------------------------------------------------------------------------------------------------------------------------------------------------------------------------------------------------------|--------------------------------|----------|
| o_112 | 72 Bison bison, 52 Bos indicus, 56 Bos mutus, 52 Bos taurus, 51 Bubalus bubalis, 63 Capra hircus, 2 Macropus eugenii, 69 Ovis aries Texel, 54 Ovis aries musimon, 49 Pantholops hodgsonii, 1 Pogona vitticeps             | Mammalia,<br>Reptilia          | Chordata |
| o_118 | 81 Bison bison, 32 Bos indicus, 19 Bos mutus, 29 Bos taurus, 63 Bubalus bubalis, 19 Capra hircus, 12 Ovis aries Texel, 9 Ovis aries musimon, 11 Pantholops hodgsonii, 1 Python bivittatus                                 | Mammalia,<br>Reptilia          | Chordata |
| o_123 | 151 Bison bison, 61 Bos indicus, 37 Bos mutus, 61 Bos taurus, 124 Bubalus bubalis, 27 Capra hircus, 28 Ovis aries Texel, 12 Ovis aries musimon, 16 Pantholops hodgsonii, 2 Python bivittatus                              | Mammalia,<br>Reptilia          | Chordata |
| o_132 | 1298 Bison bison, 1319 Bos indicus, 860 Bos mutus, 1325 Bos taurus, 1233 Bubalus bubalis, 673 Capra hircus, 3 Ophiophagus hannah, 800 Ovis aries Texel, 762 Ovis aries musimon, 465 Pantholops hodgsonii, 40 Vipera berus | Mammalia,<br>Reptilia          | Chordata |
| o_134 | 20 Bison bison, 6 Bos indicus, 24 Bos mutus, 13 Bos taurus, 27 Bubalus bubalis, 18 Capra hircus, 12 Ovis aries Texel, 9 Ovis aries musimon, 14 Pantholops hodgsonii, 1 Pogona vitticeps                                   | Mammalia,<br>Reptilia          | Chordata |
| o_139 | 38 Bison bison, 4 Bos indicus, 20 Bos mutus, 7 Bos taurus, 33 Bubalus bubalis, 26 Capra hircus, 15 Ovis aries Texel, 3 Ovis aries musimon, 14 Pantholops hodgsonii, 1 Pogona vitticeps, 1 Vipera berus                    | Mammalia,<br>Reptilia          | Chordata |
| o_142 | 6 Bison bison, 4 Bos mutus, 9 Bubalus bubalis, 5 Capra hircus, 2 Ovis aries Texel, 1 Ovis aries musimon, 6 Pantholops hodgsonii, 1 Python bivittatus                                                                      | Mammalia,<br>Reptilia          | Chordata |
| o_146 | 11 Bison bison, 1 Bos indicus, 7 Bos mutus, 1 Bos taurus, 13 Bubalus bubalis, 3 Capra hircus, 3 Ovis aries Texel, 7 Pantholops hodgsonii, 1 Python bivittatus                                                             | Mammalia,<br>Reptilia          | Chordata |
| o_156 | 2 Lethenteron camtschaticum, 1 Oreochromis niloticus                                                                                                                                                                      | Actinopterygii,<br>Hyperoartia | Chordata |
| o_168 | 10 Bison bison, 1 Bos indicus, 3 Bos mutus, 1 Bos taurus, 8 Bubalus bubalis, 5 Capra hircus, 4 Pantholops hodgsonii, 1 Python bivittatus                                                                                  | Mammalia,<br>Reptilia          | Chordata |

| Family | Number of BovBs from each species                                                                                                                                                                               | Eukaryotic Classes | Eukaryotic Phyla |
|--------|-----------------------------------------------------------------------------------------------------------------------------------------------------------------------------------------------------------------|--------------------|------------------|
| o_194  | 130 Bison bison, 100 Bos indicus, 108 Bos mutus, 94 Bos taurus, 122 Bubalus bubalis, 85 Capra hircus, 1 Ophiophagus hannah, 75 Ovis aries Texel, 88 Ovis aries musimon, 91 Pantholops hodgsonii, 7 Vipera berus | Mammalia, Reptilia | Chordata         |
| o_201  | 316 Bison bison, 250 Bos indicus, 69 Bos mutus, 267 Bos taurus, 206 Bubalus bubalis, 48 Capra hircus, 104 Ovis aries Texel, 94 Ovis aries musimon, 32 Pantholops hodgsonii, 1 Python bivittatus                 | Mammalia, Reptilia | Chordata         |
| o_226  | 12 Bison bison, 2 Bos indicus, 3 Bos mutus, 3 Bos taurus, 15 Bubalus bubalis, 6 Capra hircus, 3 Ovis aries Texel, 1 Ovis aries musimon, 9 Pantholops hodgsonii, 1 Pogona vitticeps                              | Mammalia, Reptilia | Chordata         |
| o_258  | 40 Bison bison, 26 Bos indicus, 10 Bos mutus, 25 Bos taurus, 31 Bubalus bubalis, 5 Capra hircus, 10 Ovis aries Texel, 19 Ovis aries musimon, 7 Pantholops hodgsonii, 1 Vipera berus                             | Mammalia, Reptilia | Chordata         |
| o_293  | 2 Macropus eugenii, 1 Ophiophagus hannah, 81 Pogona vitticeps, 1 Vipera berus                                                                                                                                   | Mammalia, Reptilia | Chordata         |
| o_316  | 1 Bubalus bubalis, 354 Pogona vitticeps, 1 Vipera berus                                                                                                                                                         | Mammalia, Reptilia | Chordata         |
| o_397  | 8 Ceratotherium simum, 6 Equus caballus Mongolian, 4 Equus caballus Thoroughbred, 5 Equus przewalskii, 1 Megaderma lyra, 1 Myotis davidii, 2 Pogona vitticeps, 2 Rhinolophus ferrumequinum                      | Mammalia, Reptilia | Chordata         |
| o_492  | 2 Anolis carolinensis, 1 Bos mutus, 3 Bubalus bubalis, 1 Capra hircus, 1 Ovis aries Texel, 1 Pantholops hodgsonii, 89 Pogona vitticeps, 3 Python bivittatus, 3 Vipera berus                                     | Mammalia, Reptilia | Chordata         |
| o_570  | 1 Bos taurus, 2 Bubalus bubalis, 2 Pantholops hodgsonii, 1 Python bivittatus                                                                                                                                    | Mammalia, Reptilia | Chordata         |
| o_576  | 4 Bison bison, 3 Bos indicus, 2 Bos mutus, 3 Bos taurus, 6 Bubalus bubalis, 2 Capra hircus, 4 Ovis aries Texel, 4 Ovis aries musimon, 1 Pantholops hodgsonii, 1 Vipera berus                                    | Mammalia, Reptilia | Chordata         |
| o_74   | 46 Bison bison, 4 Bos indicus, 5 Bos mutus, 3 Bos taurus, 34 Bubalus bubalis, 22 Capra hircus, 17 Ovis aries Texel, 3 Ovis aries musimon, 12 Pantholops hodgsonii, 1 Vipera berus                               | Mammalia, Reptilia | Chordata         |
| o_804  | 6 Capra hircus, 4 Ovis aries Texel, 2 Ovis aries musimon, 4 Pantholops hodgsonii, 1 Python bivittatus                                                                                                           | Mammalia, Reptilia | Chordata         |
| o_83   | 883 Bison bison, 1133 Bos indicus, 478 Bos mutus, 1207 Bos taurus, 643 Bubalus bubalis, 255 Capra hircus, 517 Ovis aries Texel, 477 Ovis aries musimon, 246 Pantholops hodgsonii, 2 Pogona vitticeps            | Mammalia, Reptilia | Chordata         |

| Family | Number of BovBs from each species                                                                                                                                                                   | Eukaryotic Classes | Eukaryotic Phyla |
|--------|-----------------------------------------------------------------------------------------------------------------------------------------------------------------------------------------------------|--------------------|------------------|
| o_99   | 662 Bison bison, 632 Bos indicus, 204 Bos mutus, 680 Bos taurus, 547 Bubalus bubalis, 151 Capra hircus, 297 Ovis aries Texel, 230 Ovis aries musimon, 143 Pantholops hodgsonii, 1 Python bivittatus | Mammalia, Reptilia | Chordata         |

### Amino acid RT domains

#### CROSS-PHYLUM clusters

|      |                                                                                                                                                                                                                                                                           |                                             |                                |
|------|---------------------------------------------------------------------------------------------------------------------------------------------------------------------------------------------------------------------------------------------------------------------------|---------------------------------------------|--------------------------------|
| r_0  | 1 Adineta vaga, 29 Chrysochloris asiatica, 365 Elephantulus edwardii, 99 Loxodonta africana, 3 Mesobuthus martensii, 1 Ornithorhynchus anatinus, 163 Orycteropus afer, 6 Procavia capensis, 81 Trichechus manatus                                                         | Arachnida, Bdelloidea, Mammalia             | Arthropoda, Chordata, Rotifera |
| r_10 | 359 Anolis carolinensis, 2 Bos indicus, 1 Bos mutus, 6 Bos taurus, 1 Bubalus bubalis, 1 Capra hircus, 1 Lepisosteus oculatus, 1 Locusta migratoria, 3 Ovis aries Texel, 3 Ovis aries musimon, 3 Pantholops hodgsonii, 8 Pogona vitticeps, 3 Vipera berus                  | Actinopterygii, Insecta, Mammalia, Reptilia | Arthropoda, Chordata           |
| r_12 | 1 Centruroides exilicauda, 3 Helobdella robusta, 14 Mesobuthus martensii                                                                                                                                                                                                  | Arachnida, Clitellata                       | Annelida, Arthropoda           |
| r_2  | 5919 Bison bison, 13181 Bos indicus, 1463 Bos mutus, 14379 Bos taurus, 3150 Bubalus bubalis, 336 Capra hircus, 1 Cimex lectularius, 2 Ophiophagus hannah, 6467 Ovis aries Texel, 2092 Ovis aries musimon, 1437 Pantholops hodgsonii, 38 Pogona vitticeps, 31 Vipera berus | Insecta, Mammalia, Reptilia                 | Arthropoda, Chordata           |
| r_80 | 330 Bison bison, 498 Bos indicus, 54 Bos mutus, 525 Bos taurus, 177 Bubalus bubalis, 26 Capra hircus, 3 Cimex lectularius, 5 Ophiophagus hannah, 97 Ovis aries Texel, 69 Ovis aries musimon, 18 Pantholops hodgsonii, 682 Pogona vitticeps, 221 Vipera berus              | Insecta, Mammalia, Reptilia                 | Arthropoda, Chordata           |

#### CROSS-CLASS clusters

|       |                                                                                                                                                                                             |                          |          |
|-------|---------------------------------------------------------------------------------------------------------------------------------------------------------------------------------------------|--------------------------|----------|
| r_141 | 1 Lepisosteus oculatus, 1 Pogona vitticeps                                                                                                                                                  | Actinopterygii, Reptilia | Chordata |
| r_153 | 1 Macropus eugenii, 1 Ophiophagus hannah, 3 Pogona vitticeps, 2 Vipera berus                                                                                                                | Mammalia, Reptilia       | Chordata |
| r_161 | 1 Bison bison, 2 Bos indicus, 1 Capra hircus, 1 Ovis aries Texel, 1 Vipera berus                                                                                                            | Mammalia, Reptilia       | Chordata |
| r_21  | 296 Bison bison, 518 Bos indicus, 65 Bos mutus, 509 Bos taurus, 144 Bubalus bubalis, 14 Capra hircus, 277 Ovis aries Texel, 102 Ovis aries musimon, 90 Pantholops hodgsonii, 1 Vipera berus | Mammalia, Reptilia       | Chordata |
| r_25  | 22 Bison bison, 29 Bos indicus, 16 Bos mutus, 19 Bos taurus, 21 Bubalus bubalis, 6 Capra hircus, 16 Ovis aries Texel, 16 Ovis aries musimon, 4 Pantholops hodgsonii, 2 Pogona vitticeps     | Mammalia, Reptilia       | Chordata |

| <b>Family</b> | <b>Number of BovBs from each species</b>                                                                                                                                               | <b>Eukaryotic Classes</b> | <b>Eukaryotic Phyla</b> |
|---------------|----------------------------------------------------------------------------------------------------------------------------------------------------------------------------------------|---------------------------|-------------------------|
| r_36          | 1 Bison bison, 1 Bos mutus, 3 Bos taurus, 1 Capra hircus, 1 Ovis aries Texel, 2 Ovis aries musimon, 1 Pantholops hodgsonii, 159 Pogona vitticeps, 1 Python bivittatus, 14 Vipera berus | Mammalia,<br>Reptilia     | Chordata                |
| r_58          | 44 Bison bison, 39 Bos indicus, 14 Bos mutus, 40 Bos taurus, 17 Bubalus bubalis, 13 Capra hircus, 22 Ovis aries Texel, 28 Ovis aries musimon, 5 Pantholops hodgsonii, 1 Vipera berus   | Mammalia,<br>Reptilia     | Chordata                |

## Table S6: L1 HT candidate clusters

Table S6: The same method was used to perform all-against-all clustering of L1 elements and find discordant groupings. Clusters were kept if they contained L1s from two or more different Eukaryotic Classes and passed the *in silico* validation tests. The clustering was run three times: first, using nucleotide L1 sequences between 3-9kb in length; second, using nucleotide open reading frames found within the L1s; and third, using amino acid reverse-transcriptase domains only. Some clusters looked interesting but were dismissed either because the L1s were located on short scaffolds (marked as likely contamination), or because the ORFs did not contain any known functional domains (marked as likely artifacts).

| Family                                                        | Number of L1s from each species                                                                                                                                                                                                                                                                                                                                                            | Eukaryotic Classes                                     | Eukaryotic Phyla                      |
|---------------------------------------------------------------|--------------------------------------------------------------------------------------------------------------------------------------------------------------------------------------------------------------------------------------------------------------------------------------------------------------------------------------------------------------------------------------------|--------------------------------------------------------|---------------------------------------|
| <b>Nucleotide L1 sequences</b>                                |                                                                                                                                                                                                                                                                                                                                                                                            |                                                        |                                       |
| <b>CROSS-PHYLUM clusters</b>                                  |                                                                                                                                                                                                                                                                                                                                                                                            |                                                        |                                       |
| c_220                                                         | 52 <i>Crassostrea gigas</i> , 2 <i>Lottia gigantea</i> , 1 <i>Saccoglossus kowalevskii</i> , 14 <i>Strongylocentrotus purpuratus</i>                                                                                                                                                                                                                                                       | Bivalvia, Gastropoda, Enteropneusta, Echinoidea        | Mollusca, Hemichordata, Echinodermata |
| c_25                                                          | 2 <i>Anguilla anguilla</i> , 8 <i>Crassostrea gigas</i> , 129 <i>Danio rerio</i>                                                                                                                                                                                                                                                                                                           | Actinopterygii, Bivalvia                               | Chordata, Mollusca                    |
| <b>CROSS-CLASS clusters</b>                                   |                                                                                                                                                                                                                                                                                                                                                                                            |                                                        |                                       |
| c_26                                                          | 6 <i>Alligator mississippiensis</i> , 3 <i>Alligator sinensis</i> , 11 <i>Apalone spinifera</i> , 7 <i>Carcharhinus brachyurus</i> , 159 <i>Chelonia mydas</i> , 184 <i>Chrysemys picta</i> , 3 <i>Crocodylus porosus</i> , 3 <i>Gavialis gangeticus</i> , 8 <i>Latimeria chalumnae</i> , 2 <i>Lethenteron camtschaticum</i> , 49 <i>Pelodiscus sinensis</i> , 1 <i>Petromyzon marinus</i> | Sauropsida, Chondrichthyes, Sarcopterygii, Hyperoartia | Chordata                              |
| c_41                                                          | 40 <i>Latimeria chalumnae</i> , 1 <i>Oryzias latipes</i>                                                                                                                                                                                                                                                                                                                                   | Sarcopterygii, Actinopterygii                          | Chordata                              |
| c_65                                                          | 105 <i>Anolis carolinensis</i> , 11 <i>Ophiophagus hannah</i> , 9 <i>Pogona vitticeps</i> , 4 <i>Vipera berus</i> , 2 <i>Xenopus laevis</i>                                                                                                                                                                                                                                                | Sauropsida, Amphibia                                   | Chordata                              |
| <b>Interesting but likely contamination (short scaffolds)</b> |                                                                                                                                                                                                                                                                                                                                                                                            |                                                        |                                       |
| c_14096                                                       | 1 <i>Drosophila ficusphila</i> , 1 <i>Lytechinus variegatus</i>                                                                                                                                                                                                                                                                                                                            | Insecta, Echinoidea                                    | Arthropoda, Echinodermata             |
| c_162                                                         | 1 <i>Protopolystoma xenopodis</i> , 41 <i>Xenopus laevis</i> , 35 <i>Xenopus tropicalis</i>                                                                                                                                                                                                                                                                                                | Amphibia, Monogenea                                    | Chordata, Platyhelminthes             |
| c_2488                                                        | 1 <i>Drosophila ficusphila</i> , 2 <i>Lytechinus variegatus</i>                                                                                                                                                                                                                                                                                                                            | Insecta, Echinoidea                                    | Arthropoda, Echinodermata             |
| c_257                                                         | 1 <i>Cricetulus griseus</i> , 16514 <i>Mus musculus</i> , 18274 <i>Rattus norvegicus</i> , 1 <i>Schistosoma japonicum</i>                                                                                                                                                                                                                                                                  | Mammalia, Trematoda                                    | Chordata, Platyhelminthes             |
| c_5994                                                        | 1 <i>Drosophila ficusphila</i> , 1 <i>Lytechinus variegatus</i>                                                                                                                                                                                                                                                                                                                            | Insecta, Echinoidea                                    | Arthropoda, Echinodermata             |
| c_8560                                                        | 1 <i>Drosophila ficusphila</i> , 5 <i>Strongylocentrotus purpuratus</i>                                                                                                                                                                                                                                                                                                                    | Insecta, Echinoidea                                    | Arthropoda, Echinodermata             |

### Nucleotide ORFs

#### CROSS-PHYLUM clusters

| Family | Number of L1s from each species                                                      | Eukaryotic Classes                         | Eukaryotic Phyla        |
|--------|--------------------------------------------------------------------------------------|--------------------------------------------|-------------------------|
| o_374  | 99 <i>Crassostrea gigas</i> , 1 <i>Lottia gigantea</i> , 2 <i>Priapulus caudatus</i> | Bivalvia,<br>Gastropoda,<br>Priapulimorpha | Mollusca,<br>Priapulida |
| o_666  | 26 <i>Crassostrea gigas</i> , 1 <i>Priapulus caudatus</i>                            | Bivalvia, Priapulimorpha                   | Mollusca,<br>Priapulida |

#### CROSS-CLASS clusters

|       |                                                                                                                                                                                                                                                                                               |                              |               |
|-------|-----------------------------------------------------------------------------------------------------------------------------------------------------------------------------------------------------------------------------------------------------------------------------------------------|------------------------------|---------------|
| o_295 | 69 <i>Alligator mississippiensis</i> , 97 <i>Alligator sinensis</i> , 168 <i>Apalone spinifera</i> , 1098 <i>Chelonia mydas</i> , 1210 <i>Chrysemys picta</i> , 50 <i>Crocodylus porosus</i> , 70 <i>Gavialis gangeticus</i> , 17 <i>Latimeria chalumnae</i> , 338 <i>Pelodiscus sinensis</i> | Sauropsida,<br>Sarcopterygii | Chordata      |
| o_353 | 125 <i>Crassostrea gigas</i> , 2 <i>Lottia gigantea</i>                                                                                                                                                                                                                                       | Bivalvia,<br>Gastropoda      | Mollusca      |
| o_520 | 2 <i>Lytechinus variegatus</i> , 3 <i>Patiria miniata</i> , 7 <i>Strongylocentrotus purpuratus</i>                                                                                                                                                                                            | Echinoidea,<br>Asteroidea    | Echinodermata |
| o_559 | 1 <i>Lytechinus variegatus</i> , 2 <i>Patiria miniata</i>                                                                                                                                                                                                                                     | Echinoidea,<br>Asteroidea    | Echinodermata |
| o_757 | 10 <i>Crassostrea gigas</i> , 1 <i>Lottia gigantea</i>                                                                                                                                                                                                                                        | Bivalvia,<br>Gastropoda      | Mollusca      |

#### Interesting but likely artifacts (no functional domains)

|         |                                                                                                                                                                                                                                                                                                                                                                             |                                          |                         |
|---------|-----------------------------------------------------------------------------------------------------------------------------------------------------------------------------------------------------------------------------------------------------------------------------------------------------------------------------------------------------------------------------|------------------------------------------|-------------------------|
| o_13226 | 1 <i>Anopheles minimus</i> , 1 <i>Blattella germanica</i> , 2 <i>Caenorhabditis elegans</i>                                                                                                                                                                                                                                                                                 | Insecta,<br>Chromadorea                  | Arthropoda,<br>Nematoda |
| o_13299 | 3 <i>Anopheles arabiensis</i> , 1 <i>Anopheles merus</i> , 1 <i>Anopheles quadriannulatus</i> , 1 <i>Caenorhabditis</i> 11                                                                                                                                                                                                                                                  | Insecta,<br>Chromadorea                  | Arthropoda,<br>Nematoda |
| o_15486 | 1 <i>Anopheles albimanus</i> , 1 <i>Anopheles atroparvus</i> , 2 <i>Anopheles darlingi</i> , 1 <i>Anopheles funestus</i> , 1 <i>Anopheles sinensis</i> , 1 <i>Haemonchus contortus</i>                                                                                                                                                                                      | Insecta,<br>Chromadorea                  | Arthropoda,<br>Nematoda |
| o_18254 | 1 <i>Aedes aegypti</i> , 1 <i>Anopheles albimanus</i> , 1 <i>Caenorhabditis brenneri</i> , 1 <i>Caenorhabditis japonica</i> , 1 <i>Drosophila takahashii</i> , 1 <i>Drosophila virilis</i> , 1 <i>Manduca sexta</i> , 1 <i>Mesobuthus martensii</i> , 1 <i>Steinernema monticolum</i> , 1 <i>Trichogramma pretiosum</i>                                                     | Insecta,<br>Chromadorea,<br>Arachnida    | Arthropoda,<br>Nematoda |
| o_21039 | 1 <i>Caenorhabditis elegans</i> , 2 <i>Centruroides exilicauda</i>                                                                                                                                                                                                                                                                                                          | Chromadorea,<br>Arachnida                | Arthropoda,<br>Nematoda |
| o_22604 | 2 <i>Anopheles culicifacies</i> , 2 <i>Anopheles dirus</i> , 1 <i>Anopheles farauti</i> , 1 <i>Anopheles sinensis</i> , 3 <i>Caenorhabditis</i> 11, 1 <i>Caenorhabditis angaria</i> , 1 <i>Caenorhabditis brenneri</i> , 1 <i>Daphnia pulex</i> , 1 <i>Drosophila bipectinata</i> , 1 <i>Drosophila grimshawi</i> , 1 <i>Drosophila rhopaloa</i> , 1 <i>Melitaea cinxia</i> | Insecta,<br>Chromadorea,<br>Branchiopoda | Arthropoda,<br>Nematoda |
| o_27328 | 1 <i>Anopheles arabiensis</i> , 1 <i>Anopheles farauti</i> , 1 <i>Caenorhabditis elegans</i> , 1 <i>Cephus cinctus</i>                                                                                                                                                                                                                                                      | Insecta,<br>Chromadorea                  | Arthropoda,<br>Nematoda |
| o_4989  | 3 <i>Drosophila biarmipes</i> , 1 <i>Necator americanus</i> , 1 <i>Strigamia maritima</i>                                                                                                                                                                                                                                                                                   | Insecta,<br>Chromadorea,<br>Chilopoda    | Arthropoda,<br>Nematoda |

| Family  | Number of L1s from each species                                                                                                                                | Eukaryotic Classes    | Eukaryotic Phyla |
|---------|----------------------------------------------------------------------------------------------------------------------------------------------------------------|-----------------------|------------------|
| o_18911 | 1 Anopheles arabiensis, 1 Anopheles epiroticus, 1 Anopheles gambiae, 1 Anopheles melas, 1 Anopheles merus, 1 Anopheles quadriannulatus, 1 Mesobuthus martensii | Insecta,<br>Arachnida | Arthropoda       |

**Interesting but likely contamination (short scaffolds)**

|         |                                                                                                                                                         |                                                                         |                              |
|---------|---------------------------------------------------------------------------------------------------------------------------------------------------------|-------------------------------------------------------------------------|------------------------------|
| o_294   | 1 Alligator mississippiensis, 6 Latimeria chalumnae, 1 Lethenteron camtschaticum, 2 Protopolystoma xenopodis, 130 Xenopus laevis, 59 Xenopus tropicalis | Sauropsida,<br>Sarcopterygii,<br>Hyperoartia,<br>Amphibia,<br>Monogenea | Chordata,<br>Platyhelminthes |
| o_1103  | 2 Drosophila ficusphila, 1 Lytechinus variegatus, 3 Strongylocentrotus purpuratus                                                                       | Insecta,<br>Echinoidea                                                  | Arthropoda,<br>Echinodermata |
| o_11511 | 1 Drosophila ficusphila, 6 Lytechinus variegatus                                                                                                        | Insecta,<br>Echinoidea                                                  | Arthropoda,<br>Echinodermata |
| o_11634 | 1 Drosophila ficusphila, 1 Lytechinus variegatus                                                                                                        | Insecta,<br>Echinoidea                                                  | Arthropoda,<br>Echinodermata |
| o_12034 | 1 Drosophila ficusphila, 3 Lytechinus variegatus                                                                                                        | Insecta,<br>Echinoidea                                                  | Arthropoda,<br>Echinodermata |
| o_12376 | 1 Drosophila ficusphila, 2 Lytechinus variegatus                                                                                                        | Insecta,<br>Echinoidea                                                  | Arthropoda,<br>Echinodermata |
| o_12900 | 1 Protopolystoma xenopodis, 1 Xenopus laevis                                                                                                            | Amphibia,<br>Monogenea                                                  | Chordata,<br>Platyhelminthes |
| o_13327 | 1 Fusarium oxysporum, 1 Pteronotus parnellii                                                                                                            | Sordariomycetes,<br>Mammalia                                            | Ascomycota,<br>Chordata      |
| o_15461 | 1 Drosophila ficusphila, 3 Lytechinus variegatus, 8 Strongylocentrotus purpuratus                                                                       | Insecta,<br>Echinoidea                                                  | Arthropoda,<br>Echinodermata |
| o_1822  | 2 Drosophila ficusphila, 1 Lytechinus variegatus, 25 Strongylocentrotus purpuratus                                                                      | Insecta,<br>Echinoidea                                                  | Arthropoda,<br>Echinodermata |
| o_1886  | 1 Drosophila ficusphila, 6 Lytechinus variegatus, 3 Strongylocentrotus purpuratus                                                                       | Insecta,<br>Echinoidea                                                  | Arthropoda,<br>Echinodermata |
| o_19358 | 1 Drosophila ficusphila, 3 Lytechinus variegatus                                                                                                        | Insecta,<br>Echinoidea                                                  | Arthropoda,<br>Echinodermata |
| o_19697 | 1 Protopolystoma xenopodis, 6 Xenopus laevis                                                                                                            | Amphibia,<br>Monogenea                                                  | Chordata,<br>Platyhelminthes |
| o_20044 | 1 Drosophila ficusphila, 3 Lytechinus variegatus                                                                                                        | Insecta,<br>Echinoidea                                                  | Arthropoda,<br>Echinodermata |
| o_2101  | 2 Drosophila ficusphila, 2 Lytechinus variegatus, 12 Strongylocentrotus purpuratus                                                                      | Insecta,<br>Echinoidea                                                  | Arthropoda,<br>Echinodermata |
| o_2734  | 2 Protopolystoma xenopodis, 80 Xenopus laevis, 34 Xenopus tropicalis                                                                                    | Amphibia,<br>Monogenea                                                  | Chordata,<br>Platyhelminthes |
| o_29    | 1 Protopolystoma xenopodis, 69 Xenopus laevis, 121 Xenopus tropicalis                                                                                   | Amphibia,<br>Monogenea                                                  | Chordata,<br>Platyhelminthes |



| Family | Number of L1s from each species                                                                            | Eukaryotic Classes           | Eukaryotic Phyla             |
|--------|------------------------------------------------------------------------------------------------------------|------------------------------|------------------------------|
| o_3056 | 2 <i>Drosophila ficusphila</i> , 2 <i>Lytechinus variegatus</i> , 25 <i>Strongylocentrotus purpuratus</i>  | Insecta,<br>Echinoidea       | Arthropoda,<br>Echinodermata |
| o_423  | 2 <i>Protopolystoma xenopodis</i> , 14 <i>Xenopus laevis</i> , 64 <i>Xenopus tropicalis</i>                | Amphibia,<br>Monogenea       | Chordata,<br>Platyhelminthes |
| o_488  | 1 <i>Drosophila ficusphila</i> , 5 <i>Lytechinus variegatus</i> , 35 <i>Strongylocentrotus purpuratus</i>  | Insecta,<br>Echinoidea       | Arthropoda,<br>Echinodermata |
| o_504  | 7 <i>Drosophila ficusphila</i> , 8 <i>Lytechinus variegatus</i> , 69 <i>Strongylocentrotus purpuratus</i>  | Insecta,<br>Echinoidea       | Arthropoda,<br>Echinodermata |
| o_575  | 5 <i>Protopolystoma xenopodis</i> , 36 <i>Xenopus laevis</i> , 1 <i>Xenopus tropicalis</i>                 | Amphibia,<br>Monogenea       | Chordata,<br>Platyhelminthes |
| o_651  | 1 <i>Drosophila ficusphila</i> , 10 <i>Lytechinus variegatus</i> , 13 <i>Strongylocentrotus purpuratus</i> | Insecta,<br>Echinoidea       | Arthropoda,<br>Echinodermata |
| o_691  | 2 <i>Drosophila ficusphila</i> , 8 <i>Lytechinus variegatus</i> , 57 <i>Strongylocentrotus purpuratus</i>  | Insecta,<br>Echinoidea       | Arthropoda,<br>Echinodermata |
| o_7039 | 2 <i>Fusarium oxysporum</i> , 1 <i>Pteronotus parnellii</i>                                                | Sordariomycetes,<br>Mammalia | Ascomycota,<br>Chordata      |

### Amino acid RT domains

#### CROSS-PHYLUM clusters

|        |                                                                     |                                   |                           |
|--------|---------------------------------------------------------------------|-----------------------------------|---------------------------|
| r_1348 | 3 <i>Branchiostoma floridae</i> , 2 <i>Mnemiopsis leidyi</i>        | Cephalochordata,<br>Tentaculata   | Chordata,<br>Ctenophora   |
| r_2916 | 1 <i>Branchiostoma floridae</i> , 4 <i>Saccoglossus kowalevskii</i> | Cephalochordata,<br>Enteropneusta | Chordata,<br>Hemichordata |

#### CROSS-CLASS clusters

|        |                                                                                                                                                                                                                                                                                                                     |                                           |               |
|--------|---------------------------------------------------------------------------------------------------------------------------------------------------------------------------------------------------------------------------------------------------------------------------------------------------------------------|-------------------------------------------|---------------|
| r_1111 | 1 <i>Fraxinus excelsior</i> , 4 <i>Phoenix dactylifera</i>                                                                                                                                                                                                                                                          | Mesangiospermae,<br>Liliopsida            | Streptophyta  |
| r_1410 | 4 <i>Carcharhinus brachyurus</i> , 1 <i>Latimeria chalumnae</i>                                                                                                                                                                                                                                                     | Chondrichthyes,<br>Sarcopterygii          | Chordata      |
| r_609  | 2 <i>Lytechinus variegatus</i> , 3 <i>Patiria miniata</i> , 3 <i>Strongylocentrotus purpuratus</i>                                                                                                                                                                                                                  | Echinoidea,<br>Asteroidea                 | Echinodermata |
| r_67   | 10 <i>Alligator mississippiensis</i> , 14 <i>Alligator sinensis</i> , 9 <i>Apalone spinifera</i> , 60 <i>Chelonia mydas</i> , 141 <i>Chrysemys picta</i> , 4 <i>Crocodylus porosus</i> , 10 <i>Gavialis gangeticus</i> , 3 <i>Latimeria chalumnae</i> , 17 <i>Pelodiscus sinensis</i> , 1 <i>Xenopus tropicalis</i> | Sauropsida,<br>Sarcopterygii,<br>Amphibia | Chordata      |

#### Interesting but likely contamination (short scaffolds)

|        |                                                                                                          |                        |                              |
|--------|----------------------------------------------------------------------------------------------------------|------------------------|------------------------------|
| r_1013 | 1 <i>Drosophila ficusphila</i> , 2 <i>Lytechinus variegatus</i> , 4 <i>Strongylocentrotus purpuratus</i> | Insecta,<br>Echinoidea | Arthropoda,<br>Echinodermata |
|--------|----------------------------------------------------------------------------------------------------------|------------------------|------------------------------|

| Family | Number of L1s from each species                                                                                                                                                                                                                                                                                          | Eukaryotic Classes                         | Eukaryotic Phyla          |
|--------|--------------------------------------------------------------------------------------------------------------------------------------------------------------------------------------------------------------------------------------------------------------------------------------------------------------------------|--------------------------------------------|---------------------------|
| r_1179 | 2 <i>Protopolystoma xenopodis</i> , 11 <i>Xenopus laevis</i> , 20 <i>Xenopus tropicalis</i>                                                                                                                                                                                                                              | Amphibia, Monogenea                        | Chordata, Platyhelminthes |
| r_1417 | 4 <i>Drosophila ficusphila</i> , 32 <i>Strongylocentrotus purpuratus</i>                                                                                                                                                                                                                                                 | Insecta, Echinoidea                        | Arthropoda, Echinodermata |
| r_1779 | 1 <i>Drosophila ficusphila</i> , 1 <i>Strongylocentrotus purpuratus</i>                                                                                                                                                                                                                                                  | Insecta, Echinoidea                        | Arthropoda, Echinodermata |
| r_1979 | 1 <i>Colletotrichum higginsianum</i> , 1 <i>Colletotrichum orchidophilum</i> , 1 <i>Fusarium oxysporum</i> , 1 <i>Parastagonospora nodorum</i> , 1 <i>Pteronotus parnellii</i>                                                                                                                                           | Sordariomycetes, Dothideomycetes, Mammalia | Ascomycota, Chordata      |
| r_2368 | 1 <i>Drosophila ficusphila</i> , 2 <i>Lytechinus variegatus</i> , 1 <i>Strongylocentrotus purpuratus</i>                                                                                                                                                                                                                 | Insecta, Echinoidea                        | Arthropoda, Echinodermata |
| r_3622 | 1 <i>Drosophila ficusphila</i> , 1 <i>Lytechinus variegatus</i>                                                                                                                                                                                                                                                          | Insecta, Echinoidea                        | Arthropoda, Echinodermata |
| r_3890 | 1 <i>Fusarium oxysporum</i> , 1 <i>Pteronotus parnellii</i>                                                                                                                                                                                                                                                              | Sordariomycetes, Mammalia                  | Ascomycota, Chordata      |
| r_4047 | 1 <i>Drosophila ficusphila</i> , 1 <i>Lytechinus variegatus</i>                                                                                                                                                                                                                                                          | Insecta, Echinoidea                        | Arthropoda, Echinodermata |
| r_430  | 1 <i>Drosophila ficusphila</i> , 3 <i>Lytechinus variegatus</i> , 11 <i>Strongylocentrotus purpuratus</i>                                                                                                                                                                                                                | Insecta, Echinoidea                        | Arthropoda, Echinodermata |
| r_4915 | 1 <i>Drosophila ficusphila</i> , 1 <i>Lytechinus variegatus</i>                                                                                                                                                                                                                                                          | Insecta, Echinoidea                        | Arthropoda, Echinodermata |
| r_498  | 1 <i>Protopolystoma xenopodis</i> , 1 <i>Xenopus laevis</i> , 23 <i>Xenopus tropicalis</i>                                                                                                                                                                                                                               | Amphibia, Monogenea                        | Chordata, Platyhelminthes |
| r_500  | 2 <i>Protopolystoma xenopodis</i> , 8 <i>Xenopus laevis</i> , 2 <i>Xenopus tropicalis</i>                                                                                                                                                                                                                                | Amphibia, Monogenea                        | Chordata, Platyhelminthes |
| r_58   | 46 <i>Cricetulus griseus</i> , 35 <i>Mesocricetus auratus</i> , 9 <i>Microtus ochrogaster</i> , 11274 <i>Mus musculus</i> , 1 <i>Pan troglodytes</i> , 16 <i>Peromyscus maniculatus</i> , 6522 <i>Rattus norvegicus</i> , 1 <i>Schistosoma mansoni</i> , 1 <i>Schistosoma rodhaini</i> , 2 <i>Tetraodon nigroviridis</i> | Mammalia, Trematoda, Actinopterygii        | Chordata, Platyhelminthes |
| r_681  | 1 <i>Drosophila ficusphila</i> , 17 <i>Strongylocentrotus purpuratus</i>                                                                                                                                                                                                                                                 | Insecta, Echinoidea                        | Arthropoda, Echinodermata |
| r_917  | 1 <i>Drosophila ficusphila</i> , 1 <i>Lytechinus variegatus</i> , 13 <i>Strongylocentrotus purpuratus</i>                                                                                                                                                                                                                | Insecta, Echinoidea                        | Arthropoda, Echinodermata |
