# Supplementary material for: Horizontal transfer of BovB and L1 retrotransposons in eukaryotes
Source: PubMed Central journal article supplement (PMC6036668; doi:10.1186/s13059-018-1456-7), 2018-07-09
Supplement: 13059_2018_1456_MOESM2_ESM.pdf [file 13059_2018_1456_MOESM2_ESM.pdf]

# Supplementary Figures

|                                                               |           |
|---------------------------------------------------------------|-----------|
| <b>Figures S1-2: L1 discordant phylogenies</b>                | <b>2</b>  |
| <b>Figures S3-54: Kimura divergence plots for BovB and L1</b> | <b>4</b>  |
| Marsupialia . . . . .                                         | 5         |
| Afrotheria . . . . .                                          | 7         |
| Chiroptera . . . . .                                          | 10        |
| Perissodactyla . . . . .                                      | 16        |
| Bovidae . . . . .                                             | 18        |
| Squamata . . . . .                                            | 22        |
| Amphibia . . . . .                                            | 26        |
| Neopterygii . . . . .                                         | 27        |
| Other . . . . .                                               | 29        |
| <b>Figure S55: Chimeric L1-BovB</b>                           | <b>31</b> |

# Figures S1-2: L1 discordant phylogenies

Potential L1 HT clusters were checked using both neighbour-joining and maximum likelihood methods to confirm that the tree topology differed from expected species relationships. The best supported cross-Phylum L1 phylogenies are shown in the main text; the remaining cross-Phylum clusters are shown here. Clusters are described in detail in Table S6.

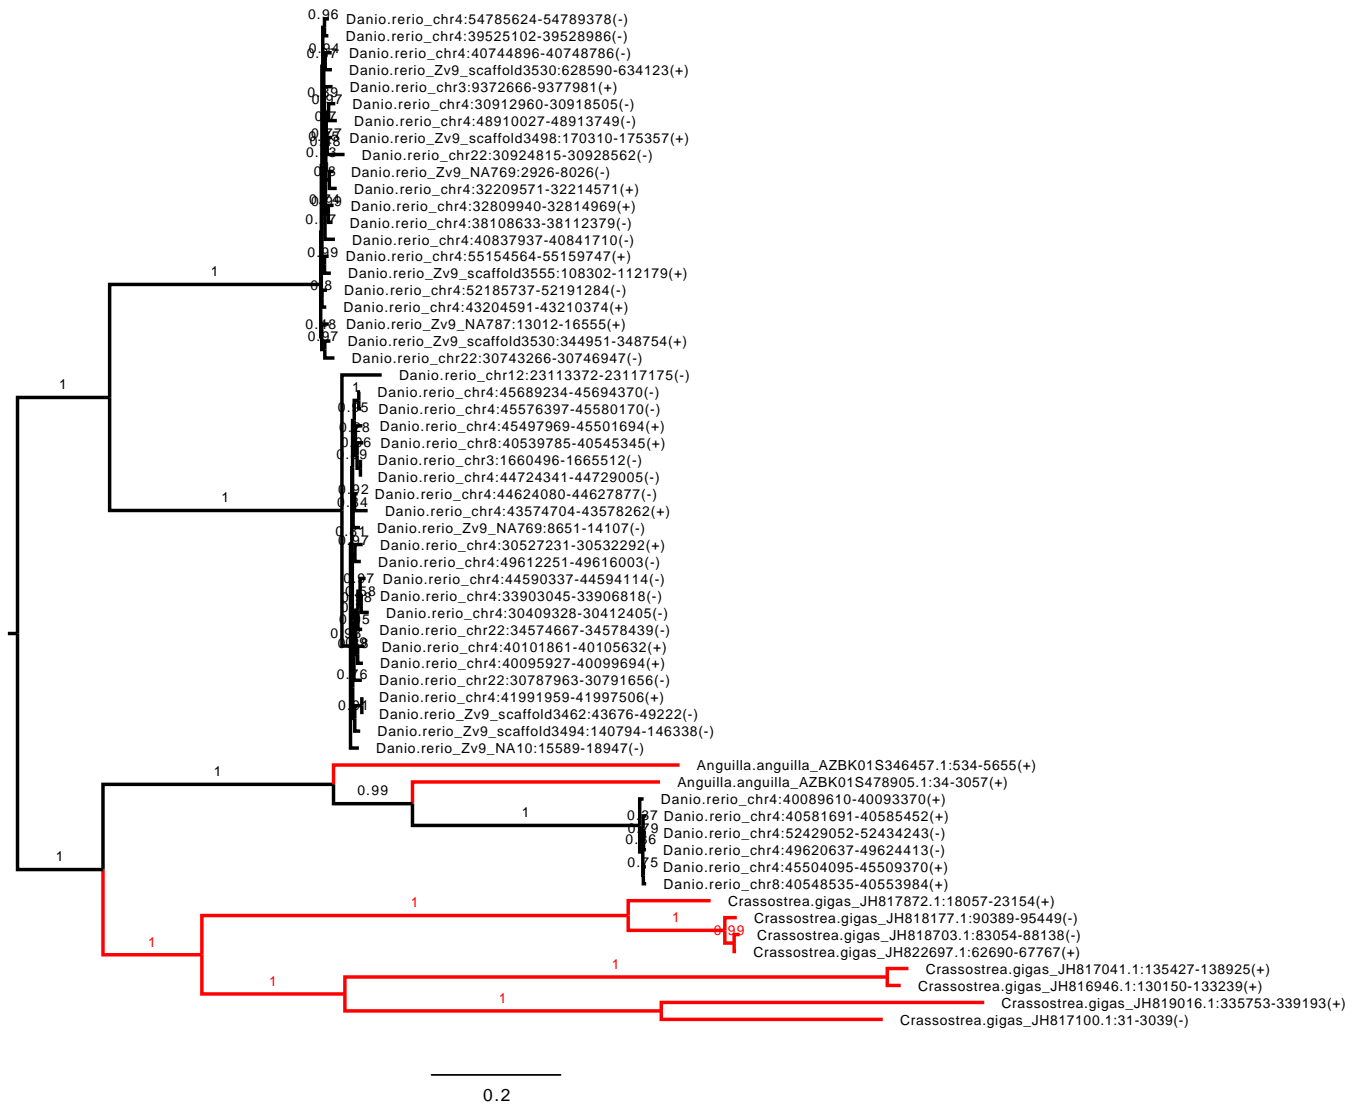

Figure S1: L1 cluster c\_25

# L1 nucleotide ORFs

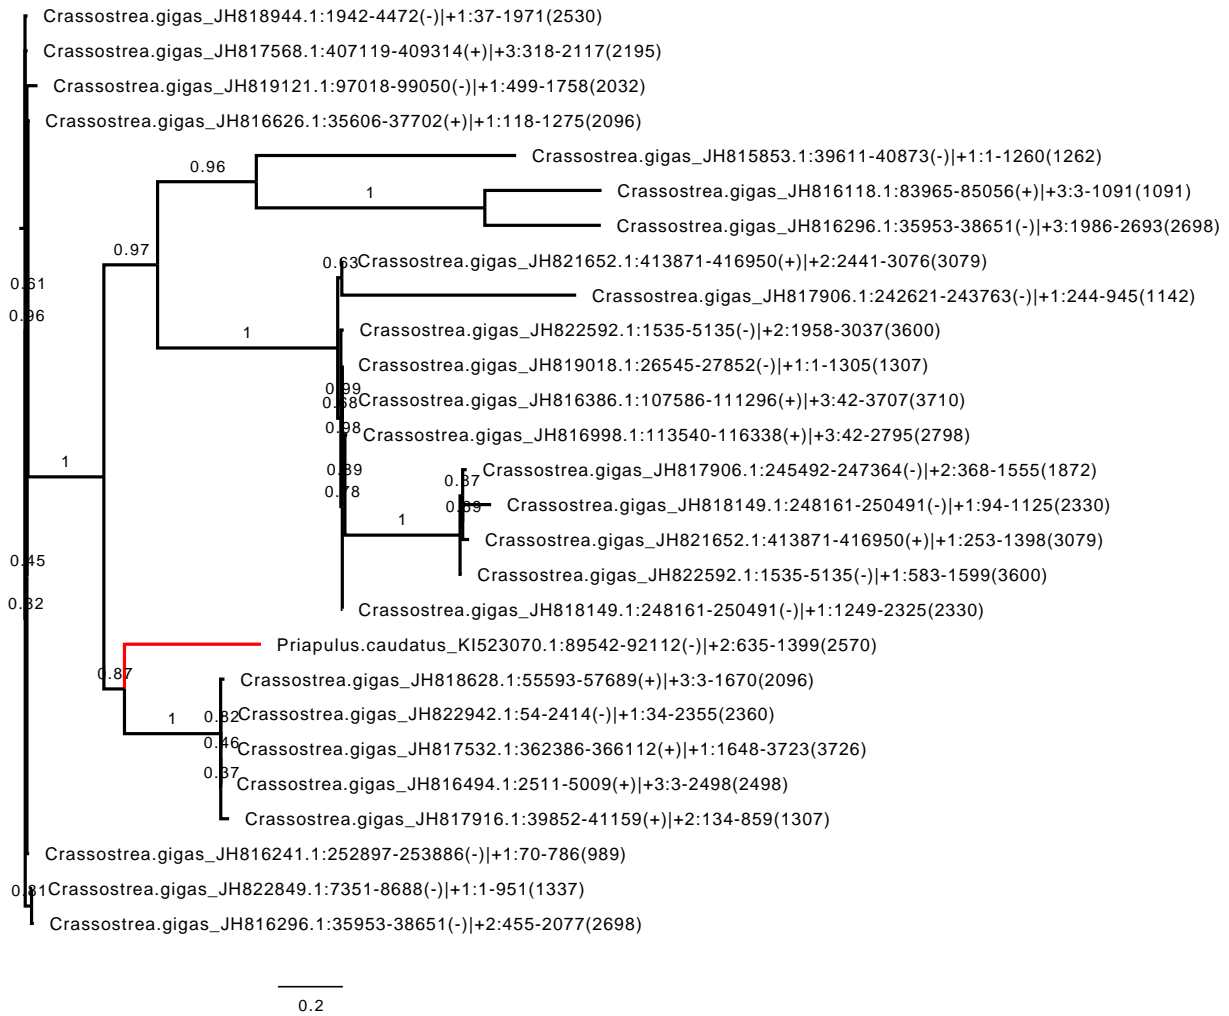

Figure S2: L1 cluster o\_666

## Figures S3-54: Kimura divergence plots for BovB and L1

RepeatMasker divergence plots represent Kimura substitution levels of TEs against the RepBase super consensus library. For example, Figure 5b in the main text shows the RepeatMasker divergence plot for the cow (*Bos taurus*), illustrating recent bursts of BovB and L1 activity in the genome with many copies sharing high identity to young, currently active elements.

The L1 superfamily includes both mammalian L1 elements (dark blue) and more diverse, frog-like Tx elements (light blue). Tx are typically found in fish, frogs and primitive eukaryotes (e.g. sea urchin *Strongylocentrotus purpuratus*). BovB elements are coloured in orange.

Typically, species within a clade show consistent divergence patterns of both TEs (particularly if there has been little recent activity - see Chiroptera). Recently TE-active species, on the other hand, are likely to show bursts of seemingly random activity. Consider the plots for the two lizard species, *Pogona vitticeps* and *Anolis carolinensis*. *Pogona* is implicated in many of the BovB HT events listed in Table S5, and this is supported by the huge burst of recent BovB activity shown in Figure S38. This is also seen in all four snake species. In contrast, the *Anolis* plot (Figure S39) indicates that L1s have become the dominant TE lineage in the genome.

By estimating TE divergence from super consensus sequences, we can visualise the contrasting (and sometimes competing) dynamics of BovB and L1 elements over time. This is particularly important for species where BovB or L1 (or both) have taken off and accumulated quickly within the genome.

# Marsupialia

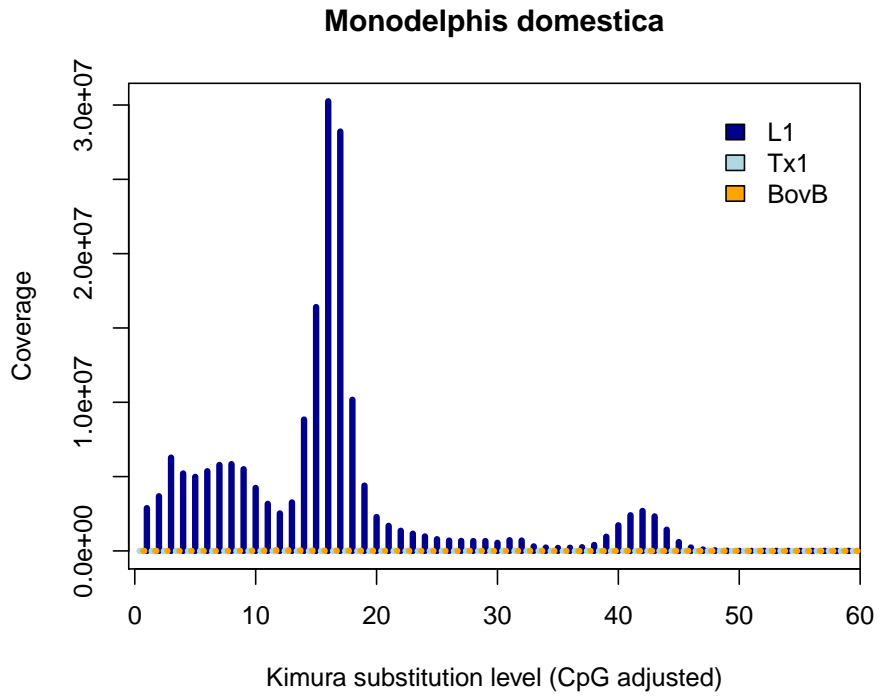

Figure S3

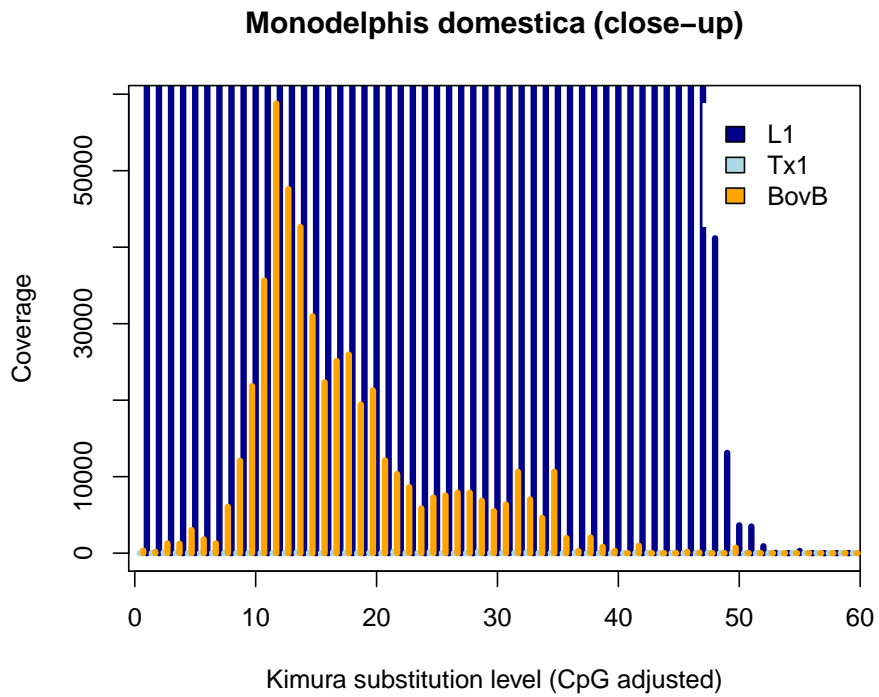

Figure S4

### Macropus eugenii

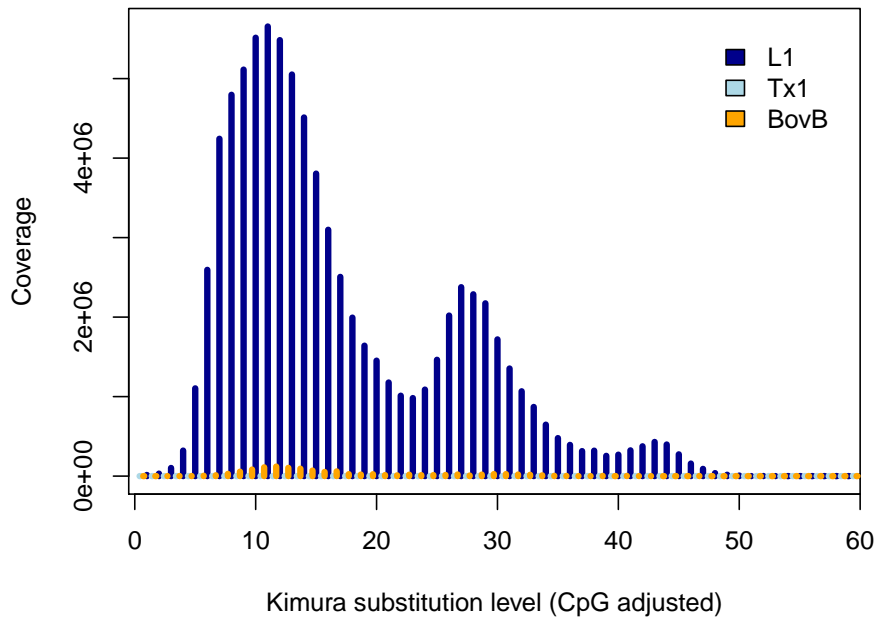

Figure S5

### Sarcophilus harrisii

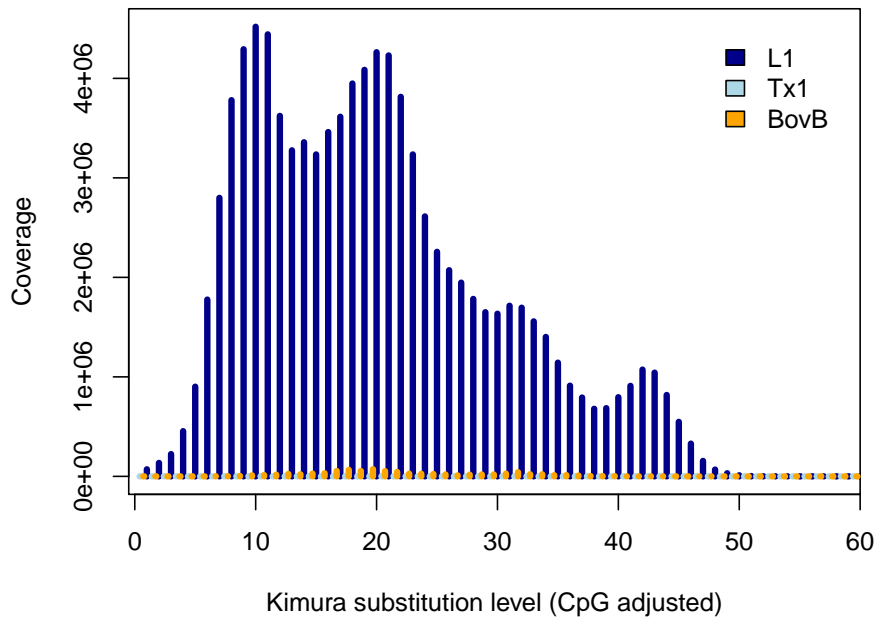

Figure S6

# Afrotheria

## Elephantulus edwardii

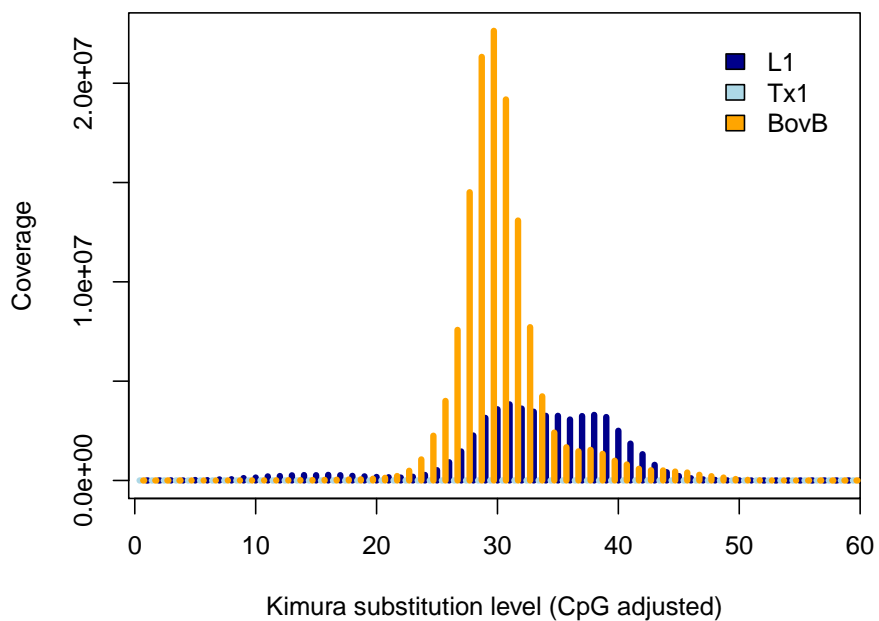

Figure S7

## Echinops telfairi

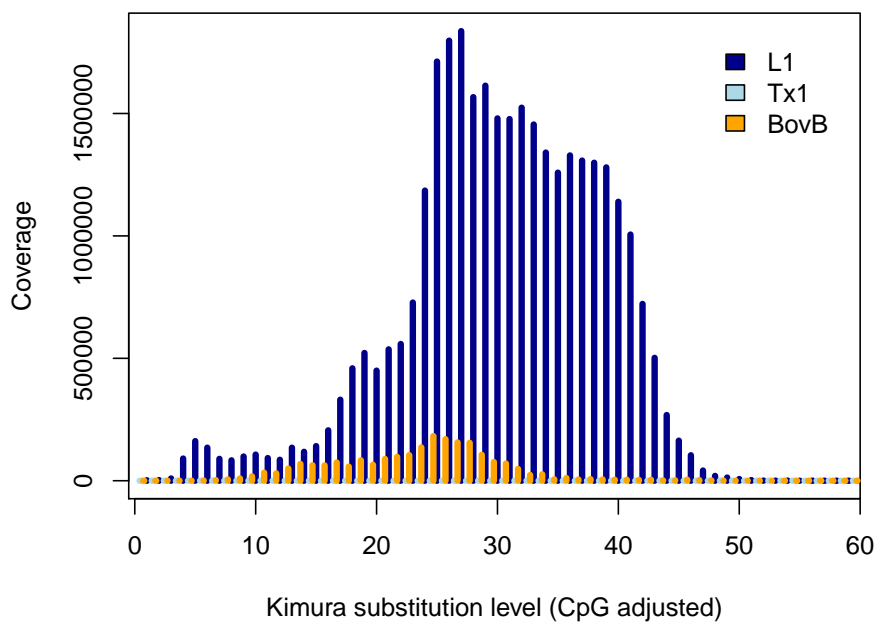

Figure S8

### Chrysochloris asiatica

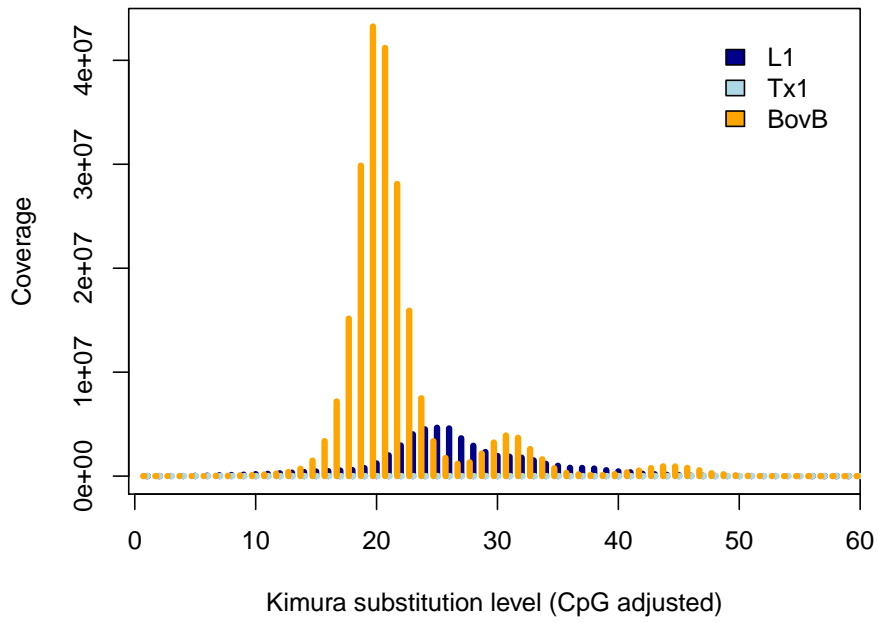

Figure S9

### Orycteropus afer

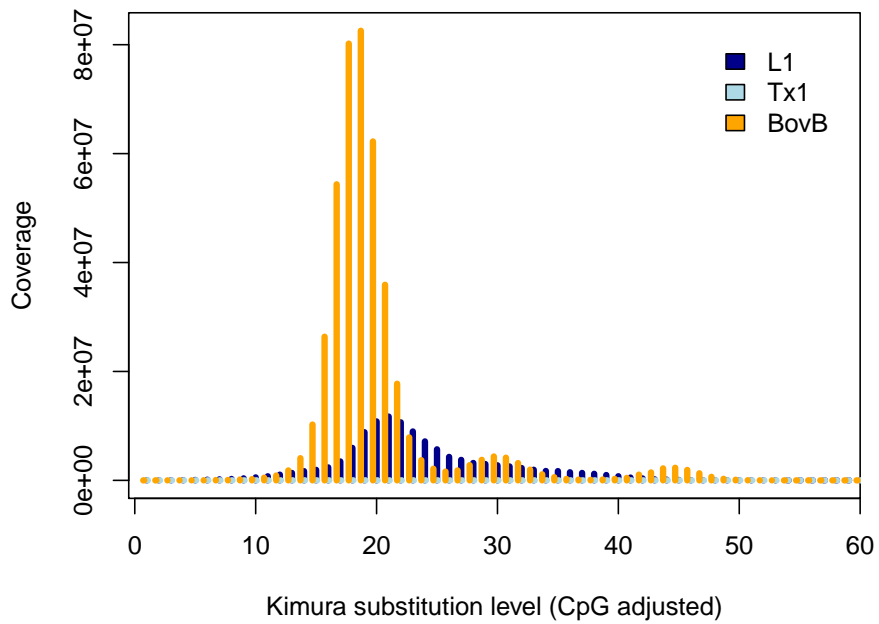

Figure S10



### Trichechus manatus

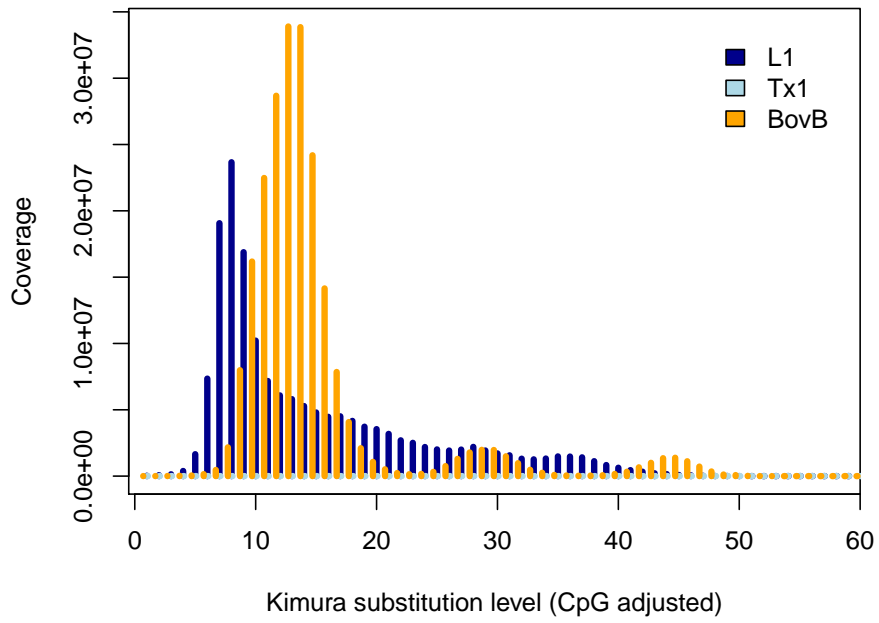

Figure S11

### Procavia capensis

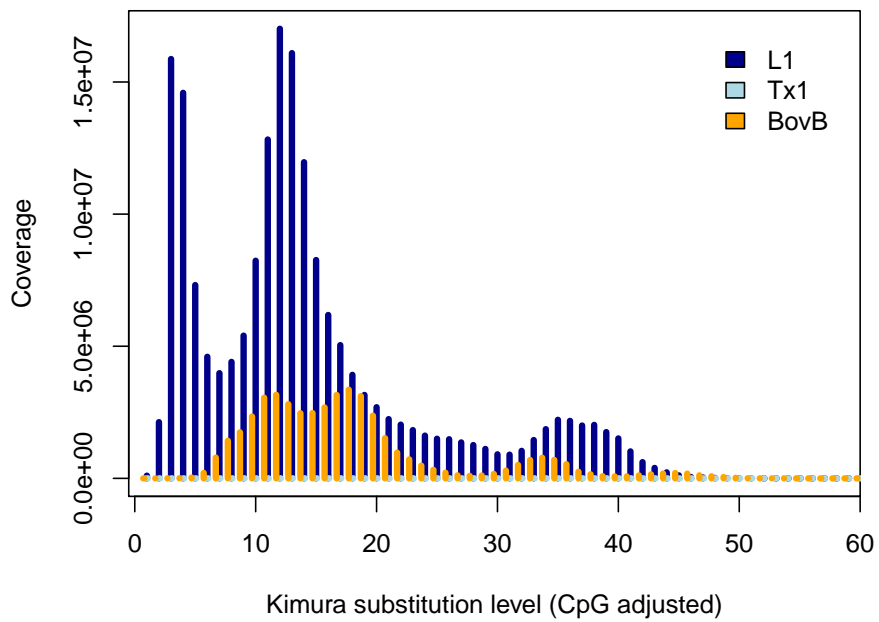

Figure S12

### Loxodonta africana

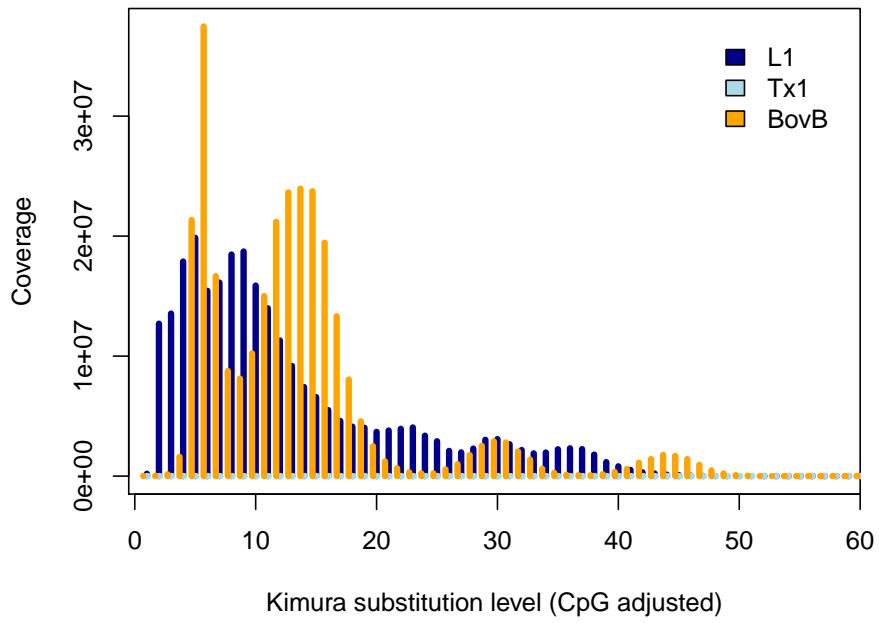

Figure S13

## Chiroptera

### Pteropus alecto

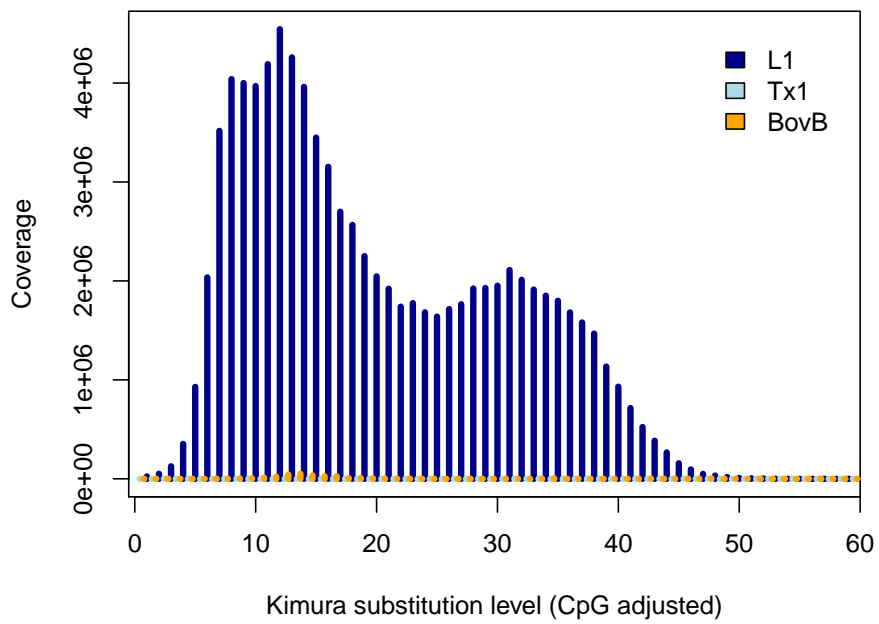

Figure S14

### Pteropus vampyrus

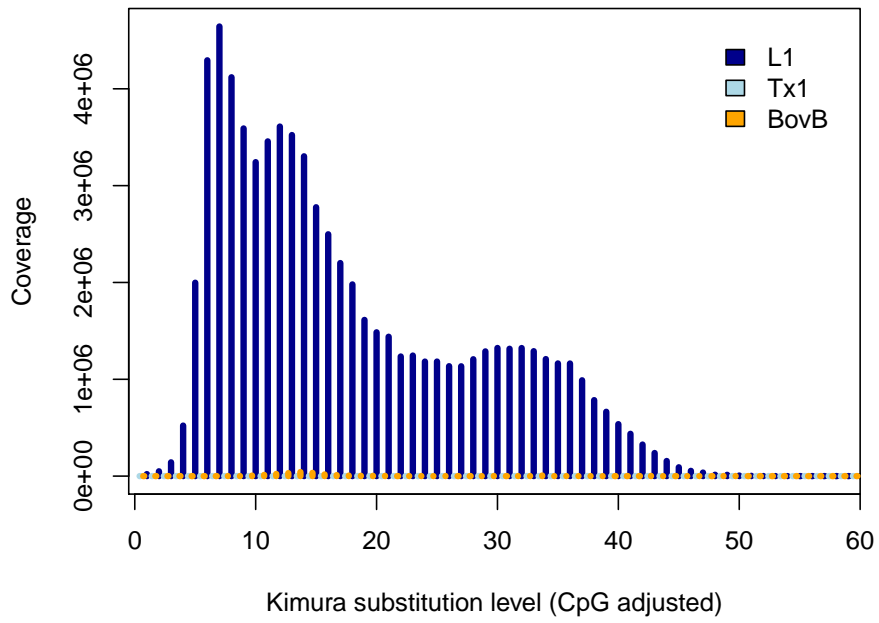

Figure S15

### Eidolon.helvum

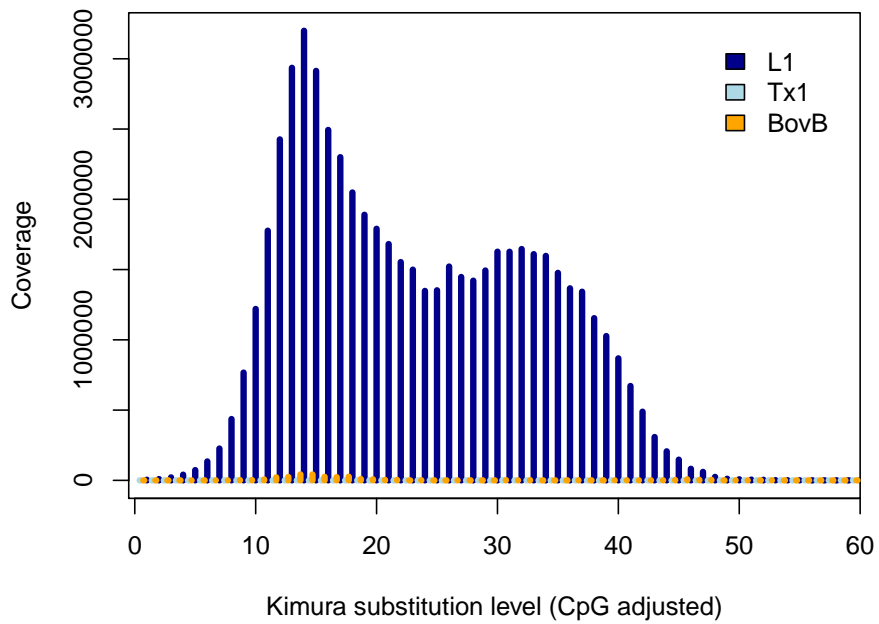

Figure S16

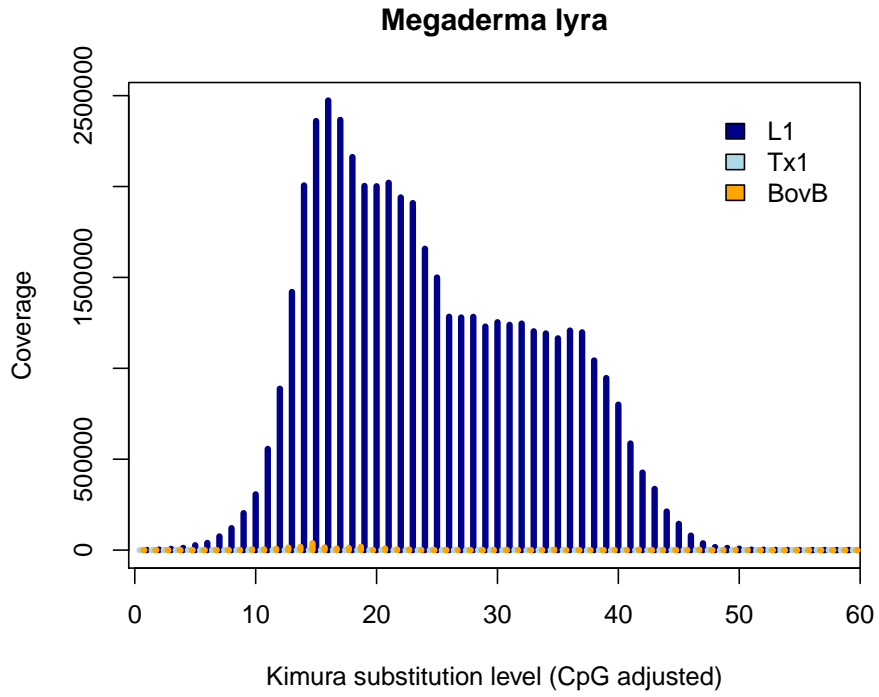

Figure S17

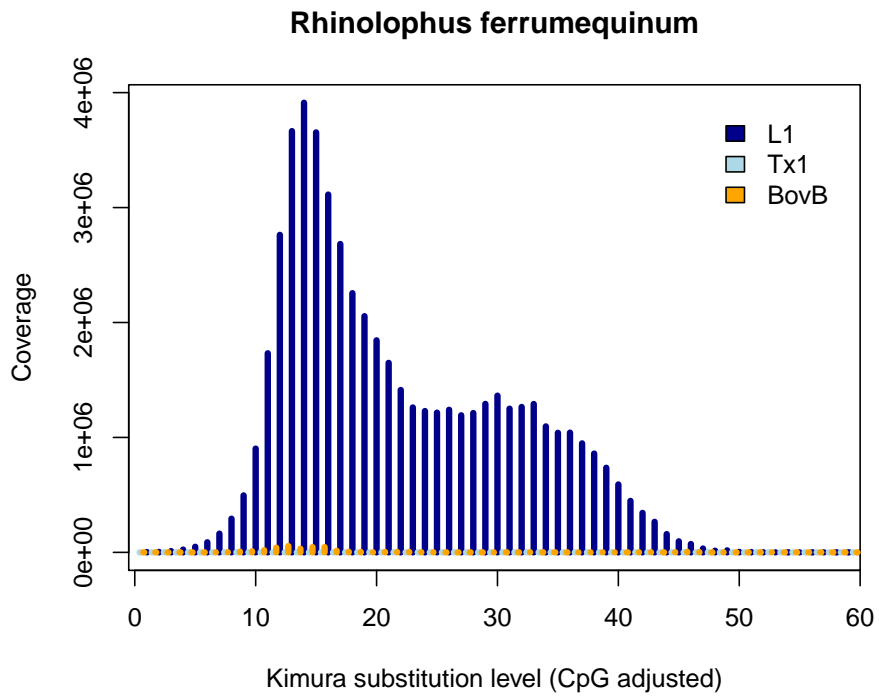

Figure S18

**Pteronotus parnellii**

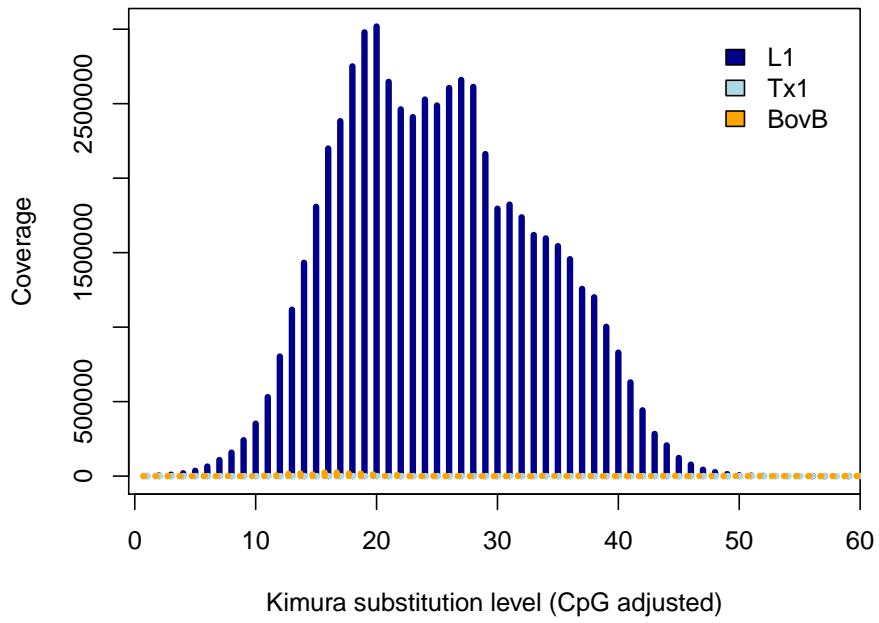

Figure S19

**Eptesicus fuscus**

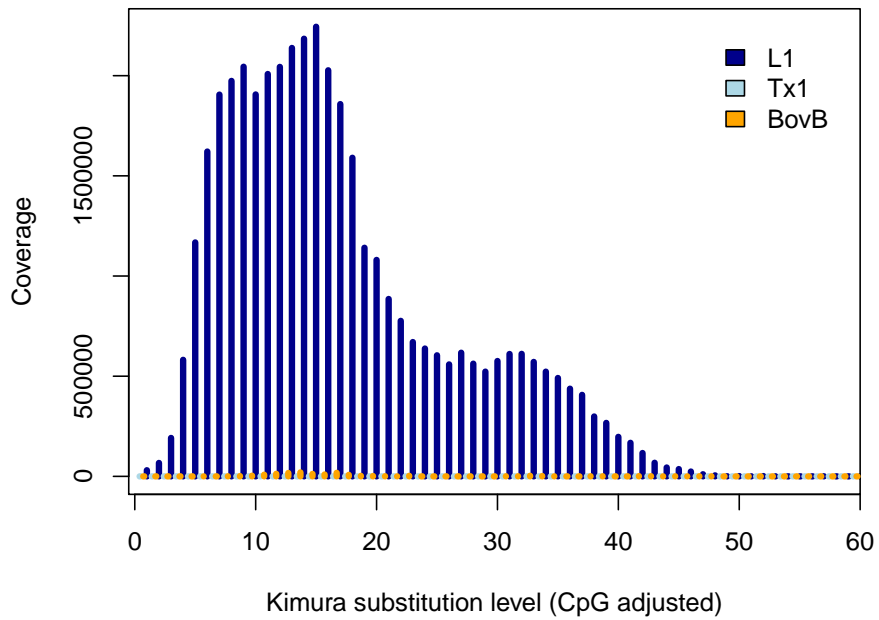

Figure S20

### Myotis brandtii

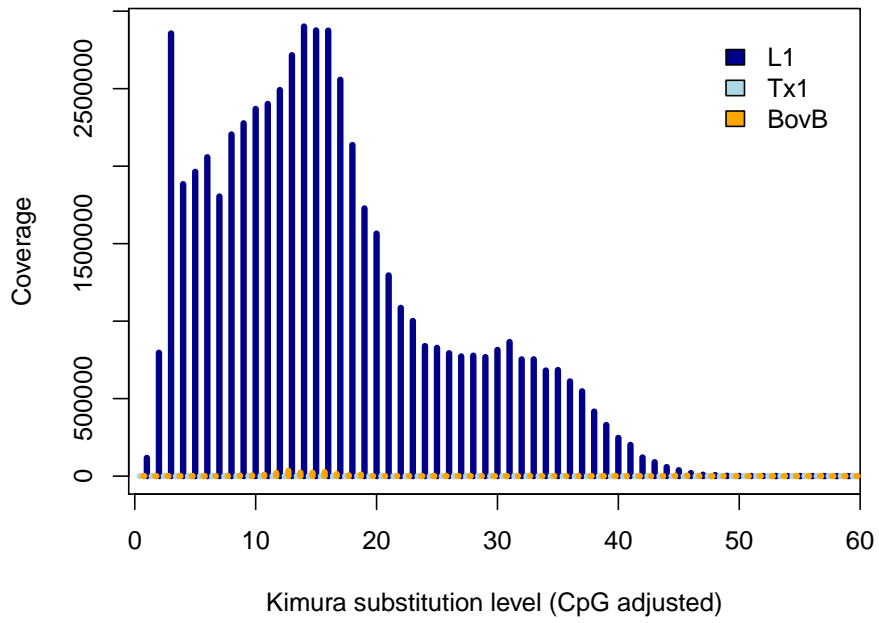

Figure S21

### Myotis davidii

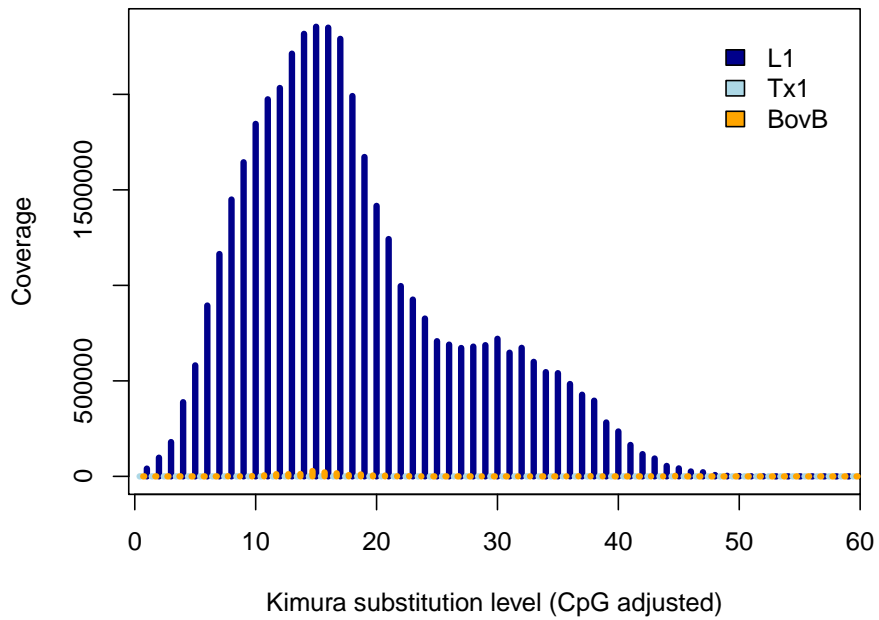

Figure S22

### Myotis lucifugus

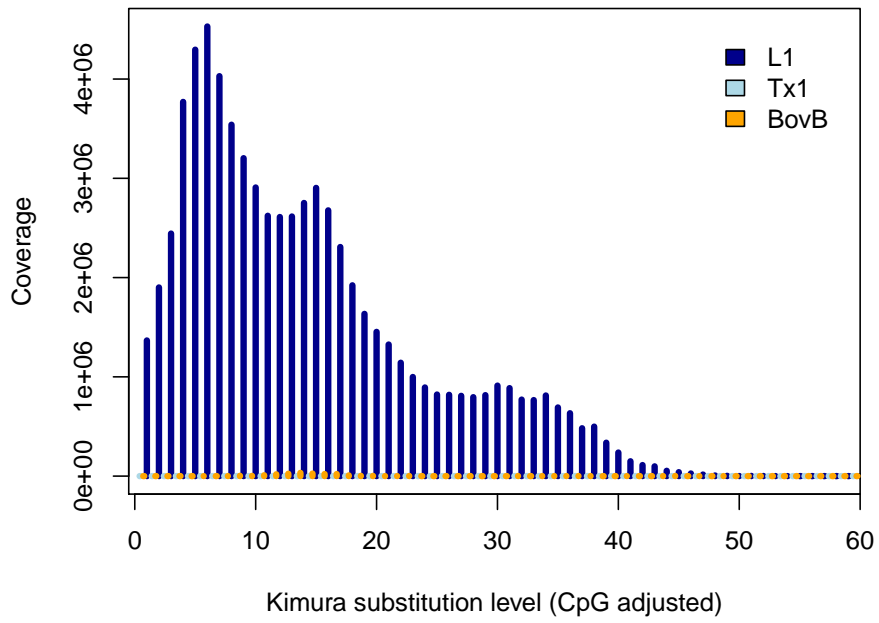

Figure S23

### Myotis lucifugus (close-up)

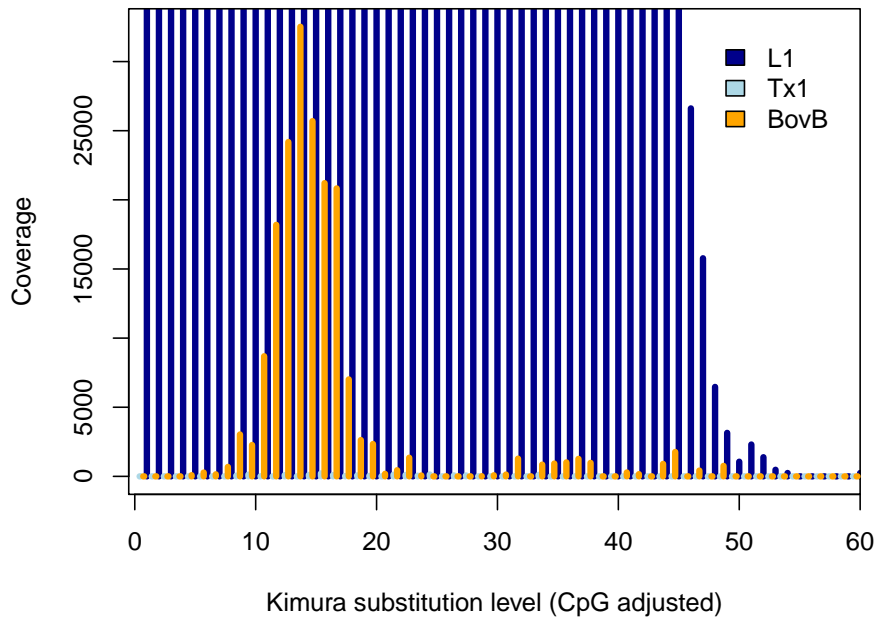

Figure S24

# Perissodactyla

## Ceratotherium simum

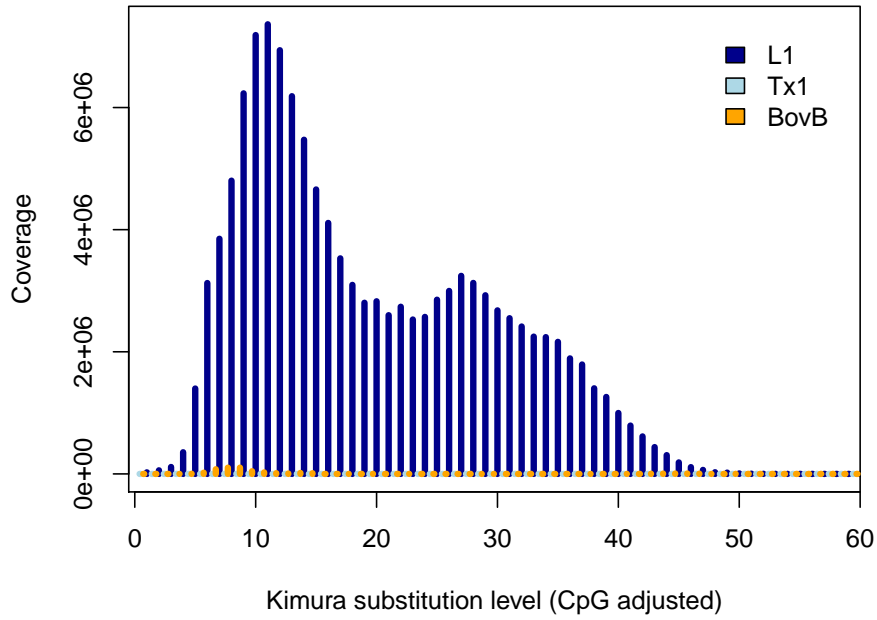

Figure S25

## Equus przewalskii

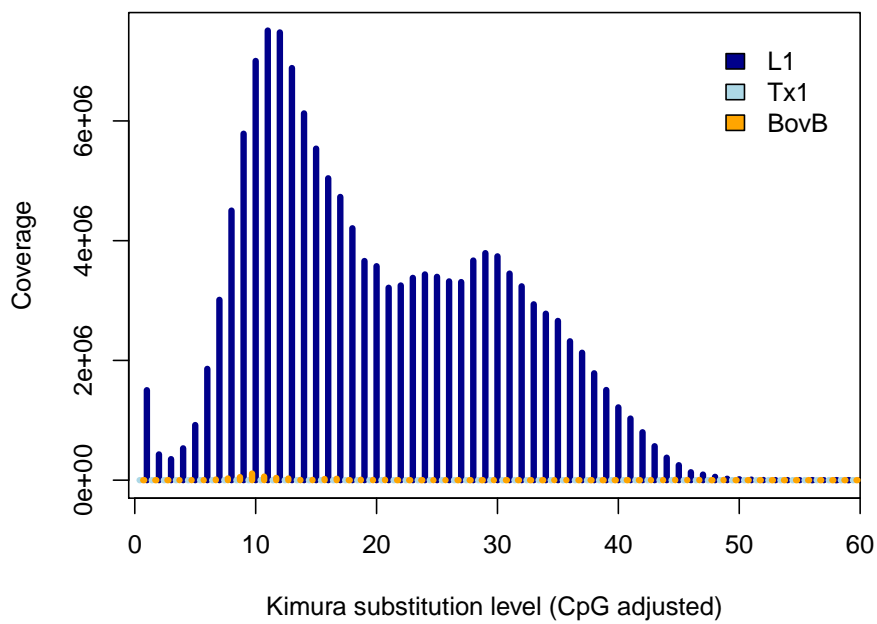

Figure S26



### Equus caballus Mongolian

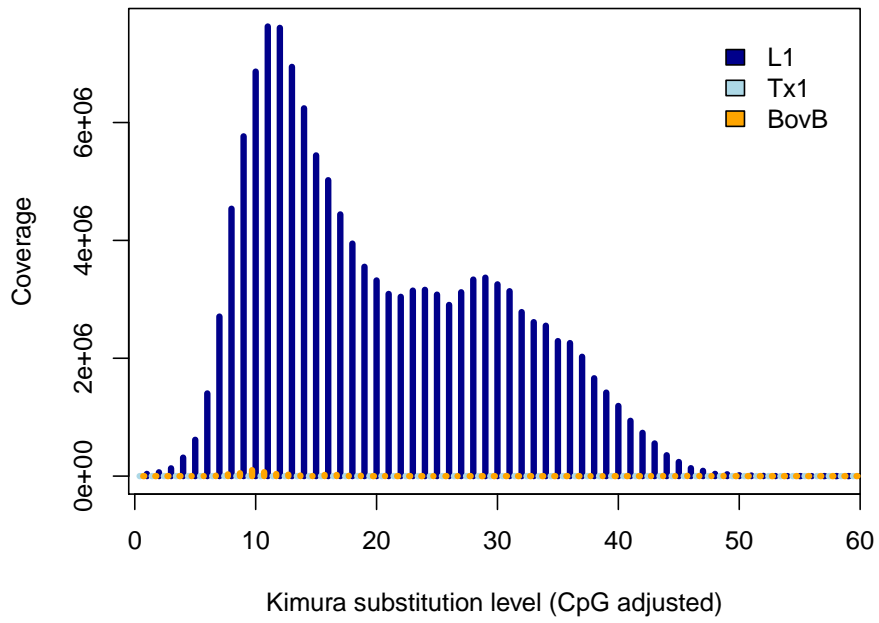

Figure S27

### Equus caballus Thoroughbred

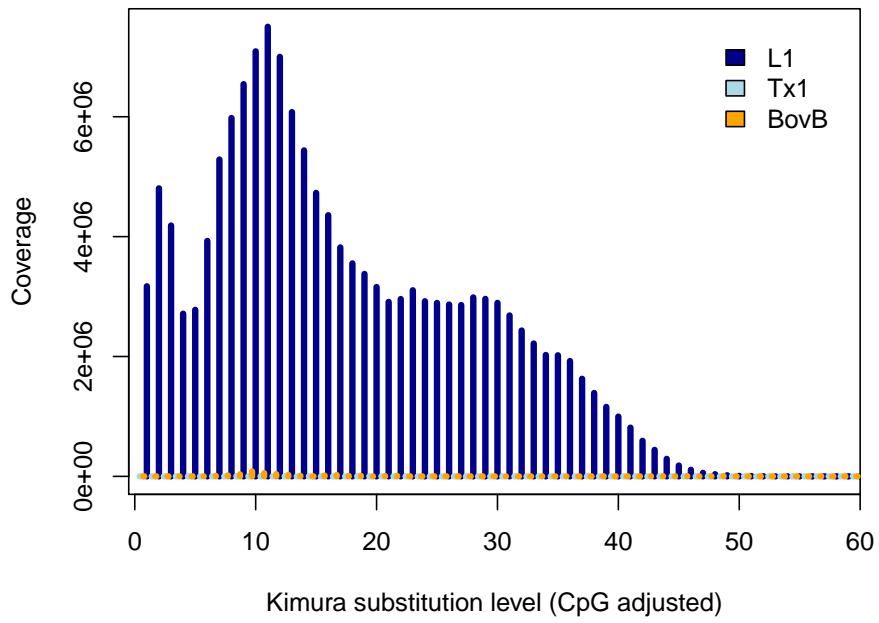

Figure S28

### Equus caballus Thoroughbred (close-up)

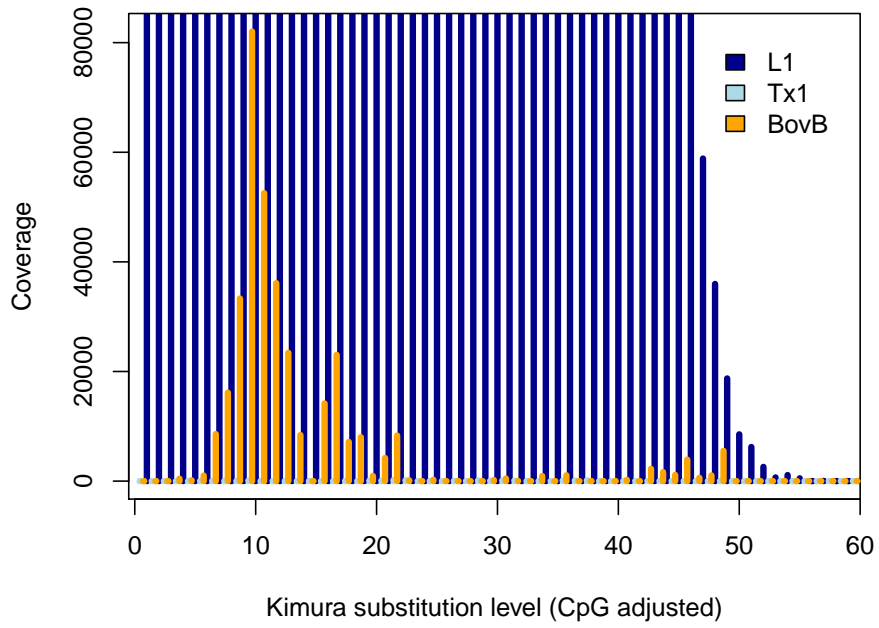

Figure S29

## Bovidae

### Pantholops hodgsonii

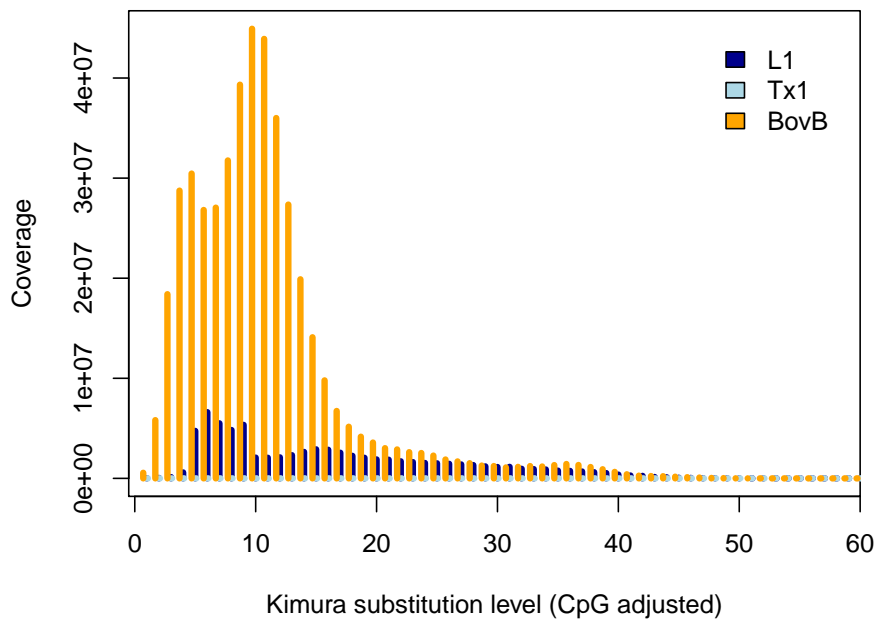

Figure S30

### Capra hircus

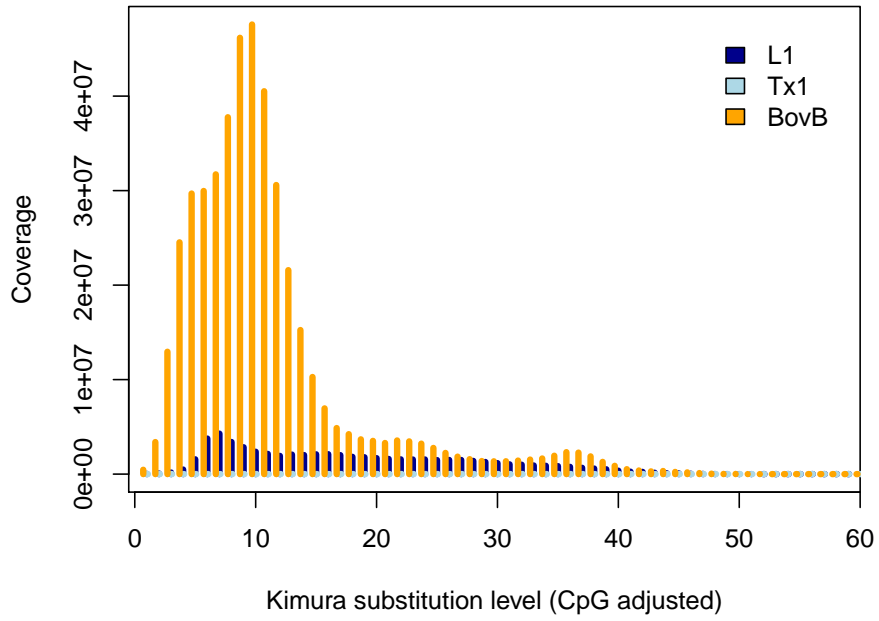

Figure S31

### Ovis aries Texel

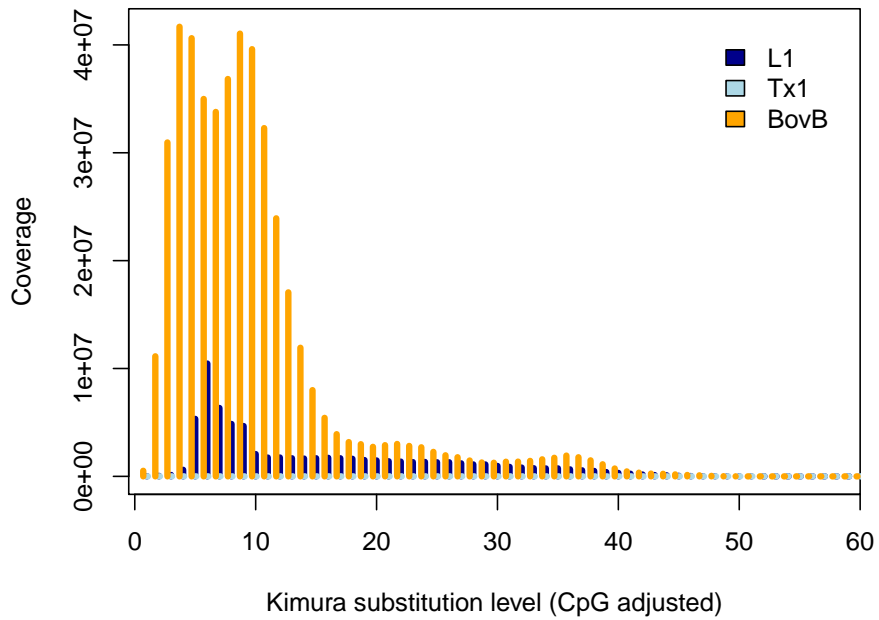

Figure S32

### Ovis aries musimon

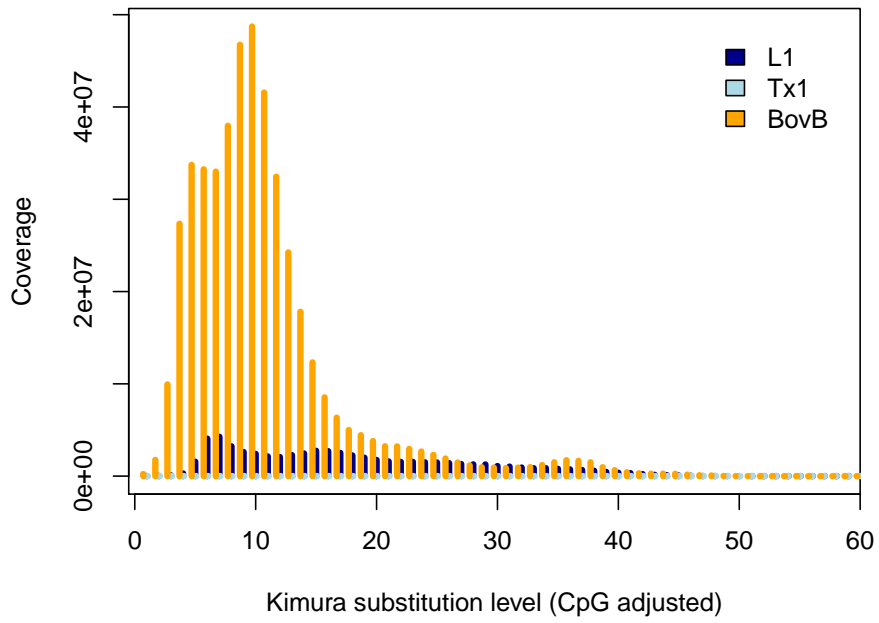

Figure S33

### Bubalus bubalis

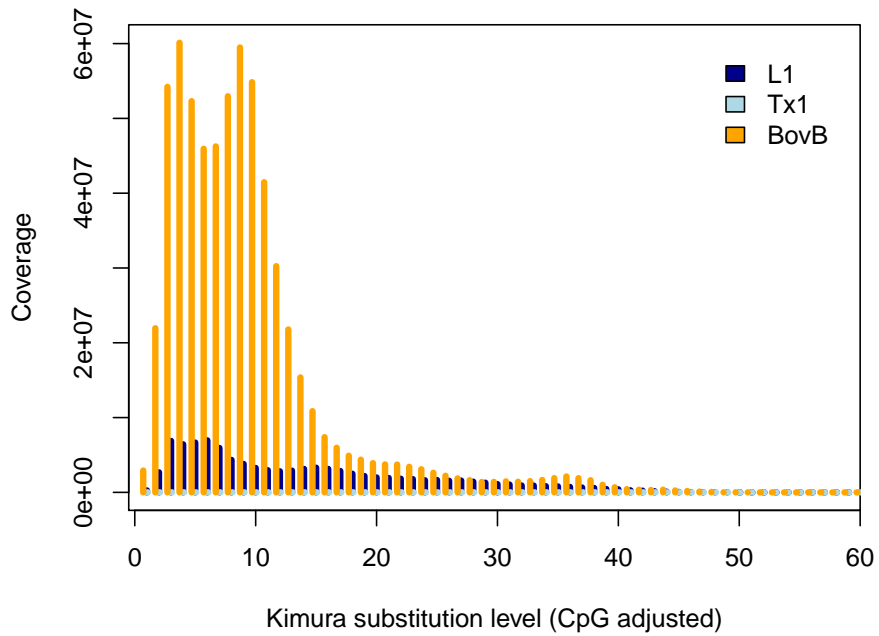

Figure S34

### Bison bison

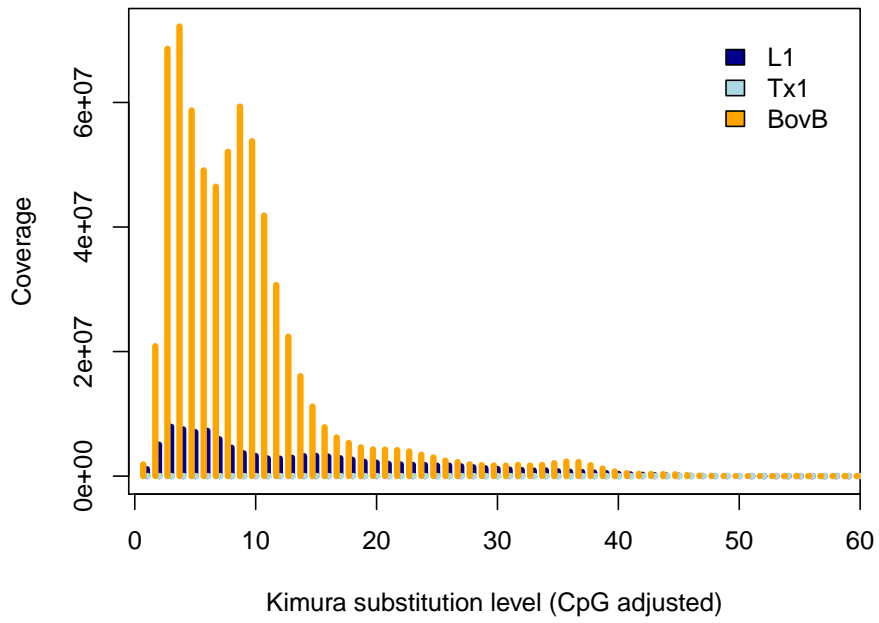

Figure S35

### Bos indicus

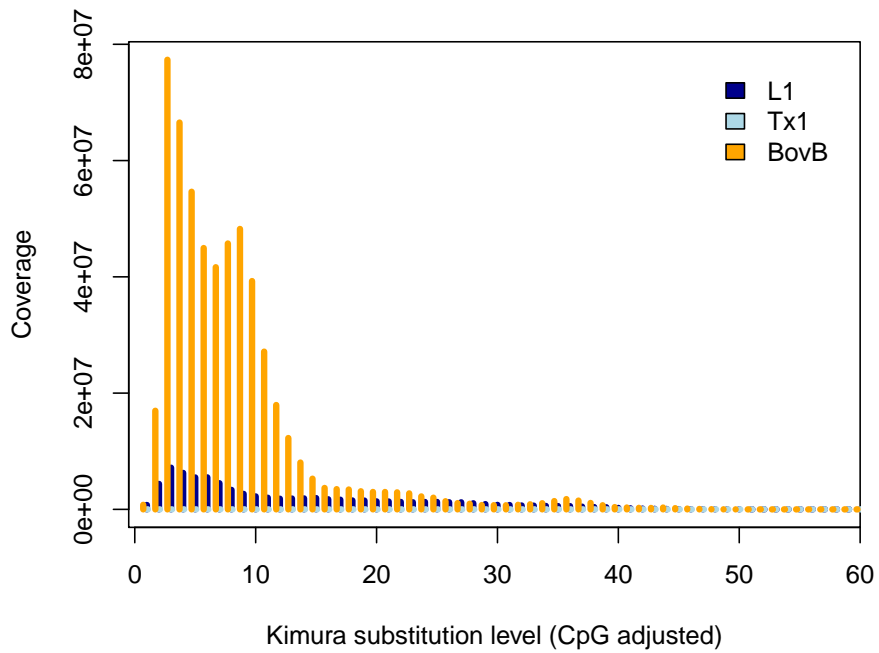

Figure S36

### Bos mutus

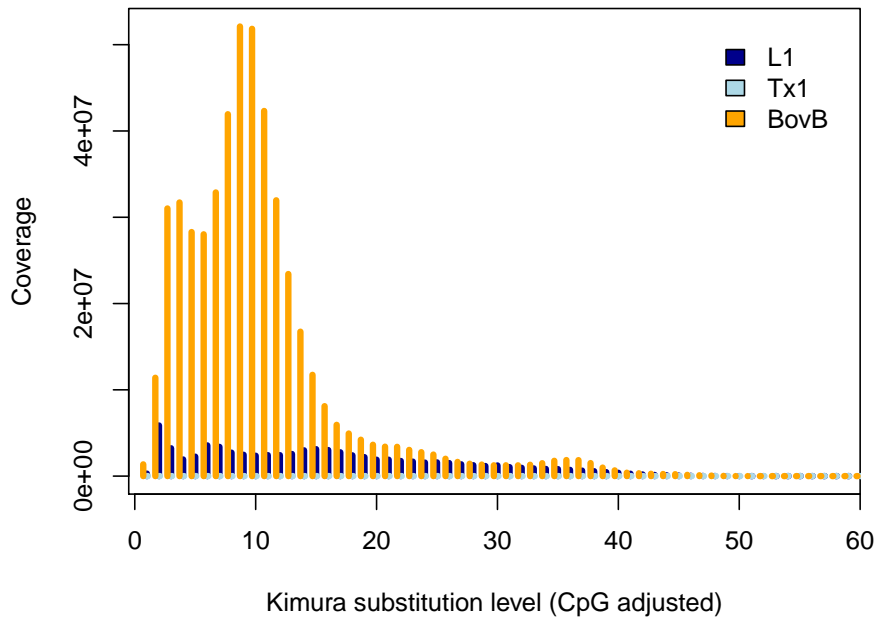

Figure S37

### Squamata

#### Pogona vitticeps

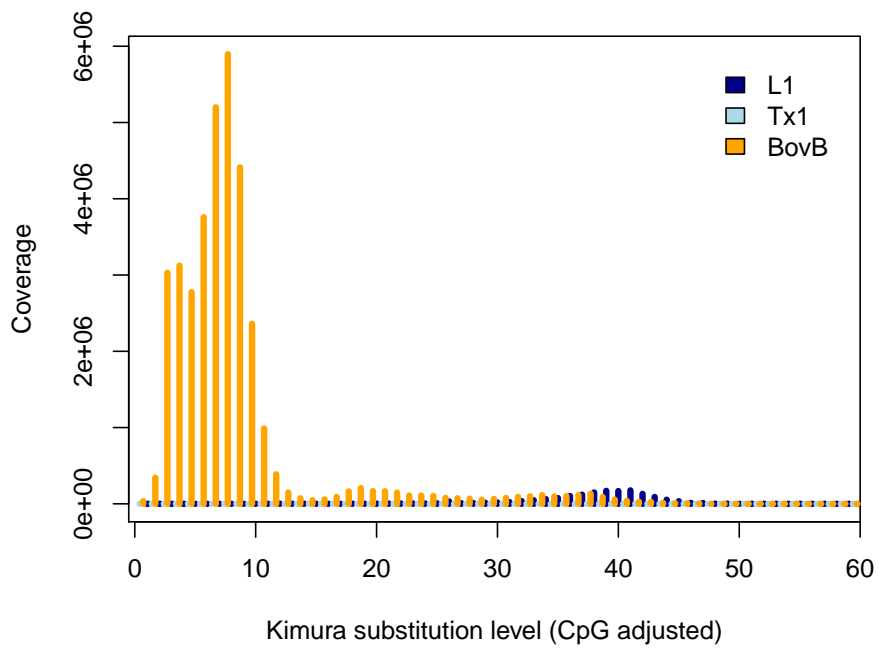

Figure S38

### Anolis carolinensis

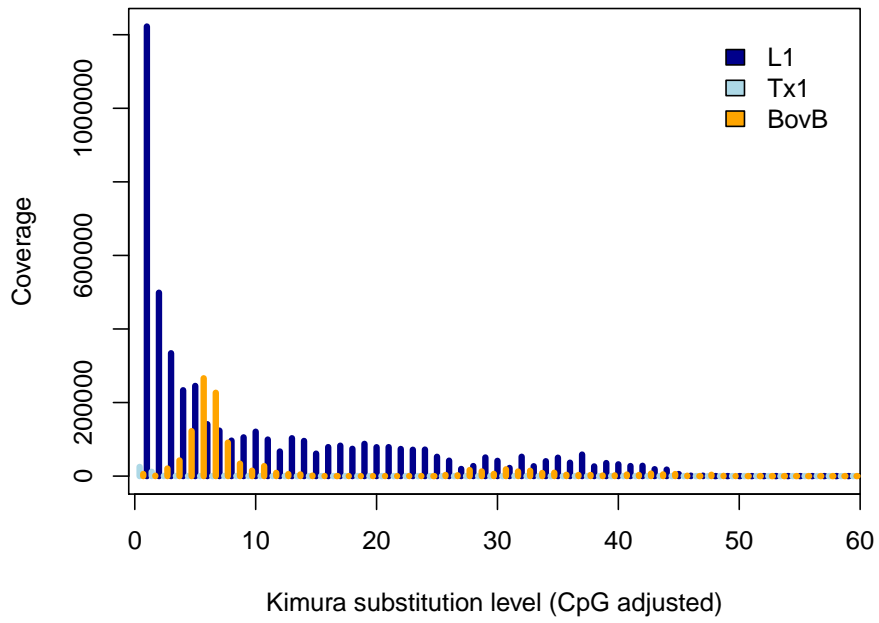

Figure S39

### Vipera berus

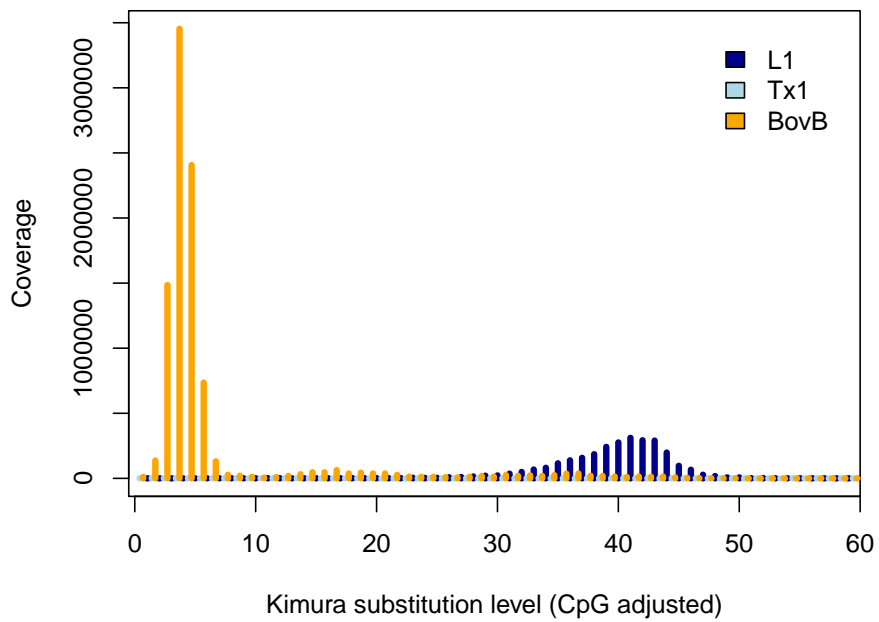

Figure S40

### Vipera berus (close-up)

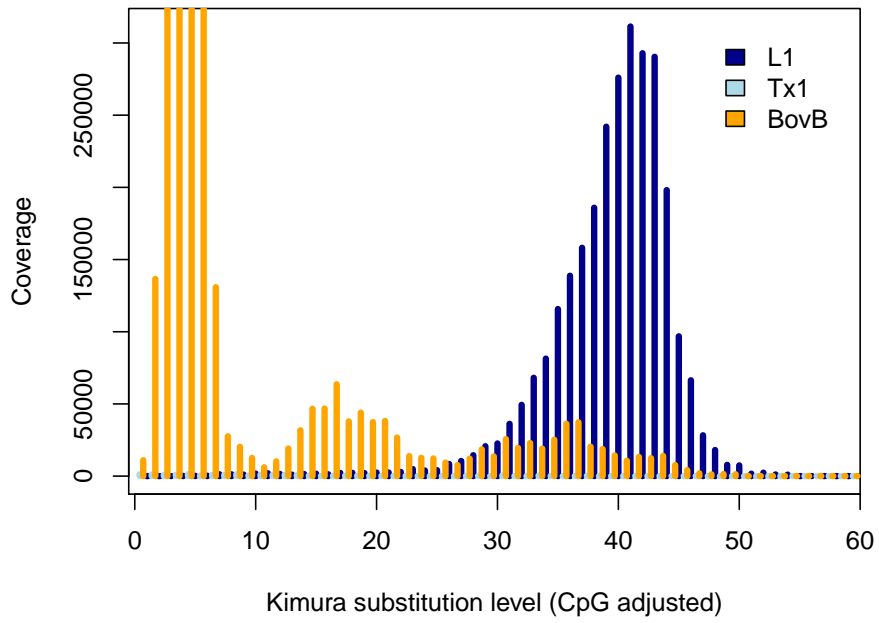

Figure S41

### Crotalus mitchellii

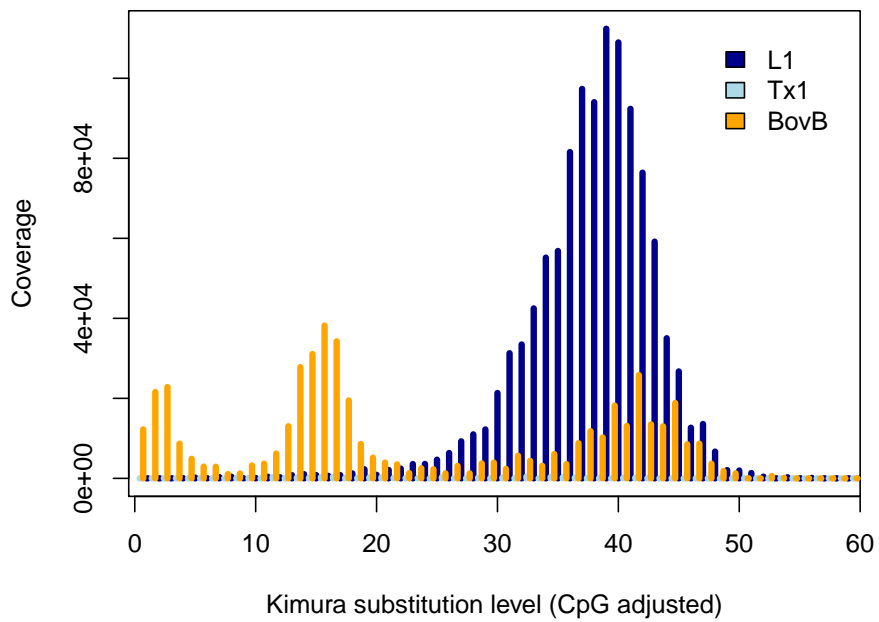

Figure S42



### Ophiophagus hannah

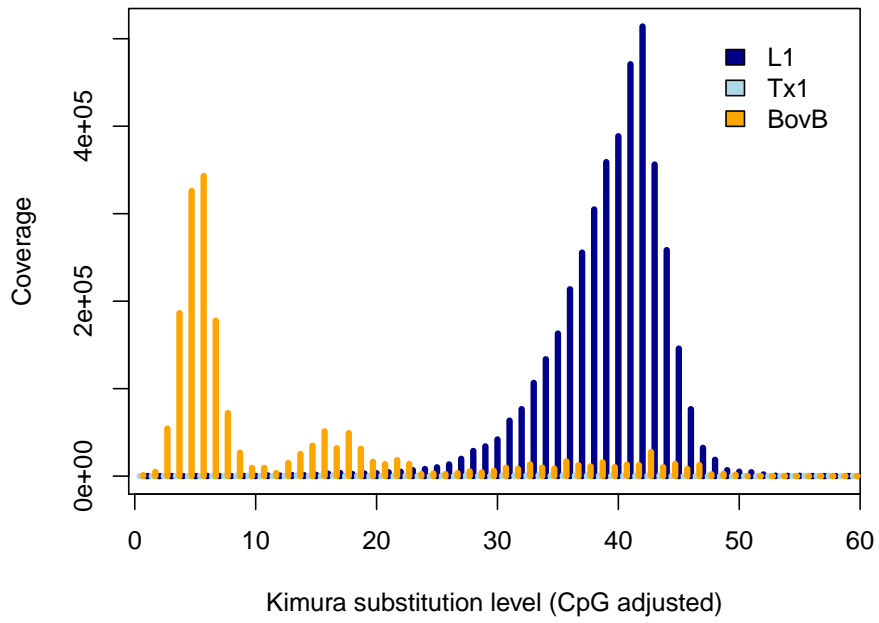

Figure S43

### Python bivittatus

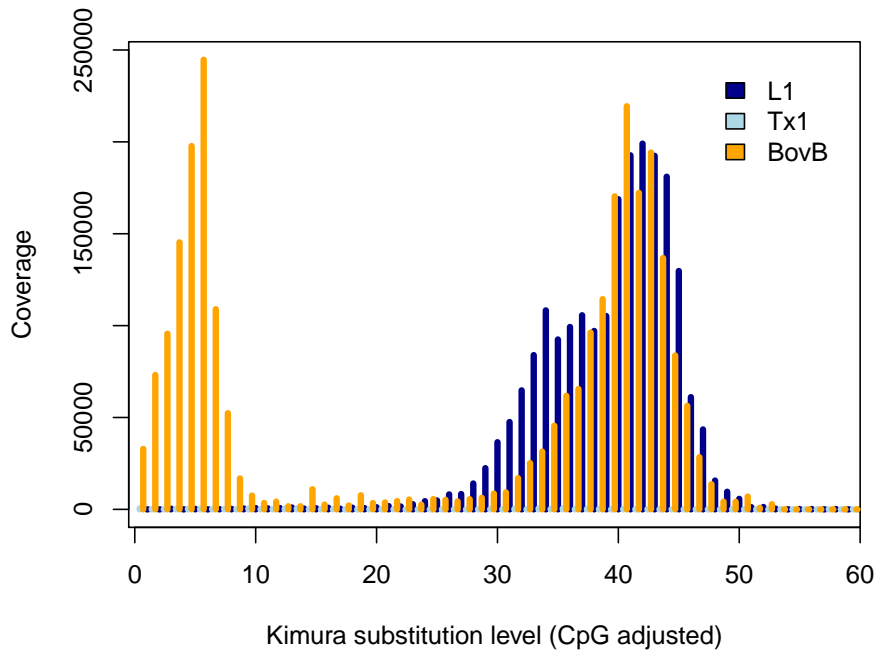

Figure S44

# Amphibia

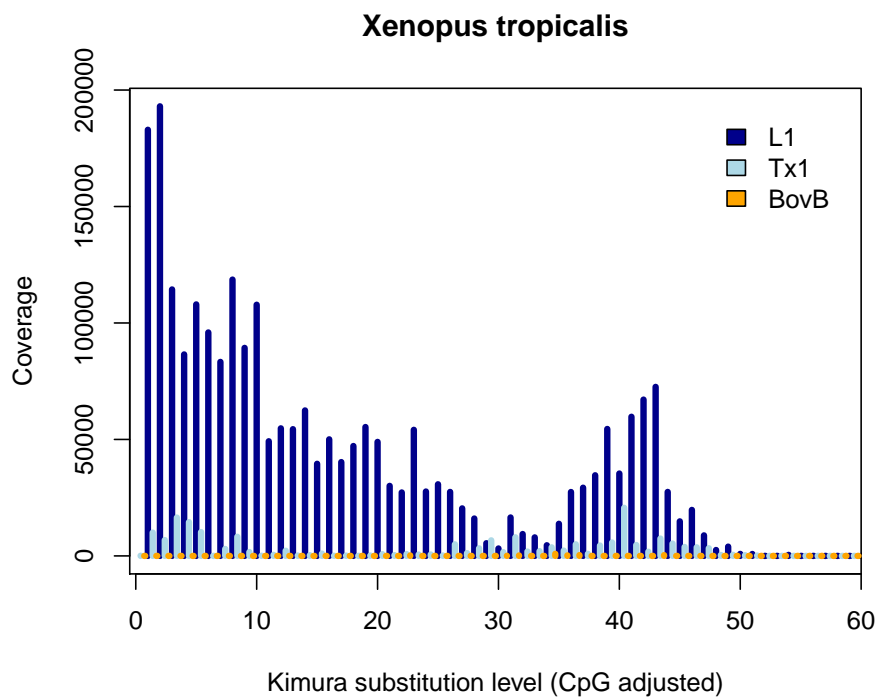

Figure S45

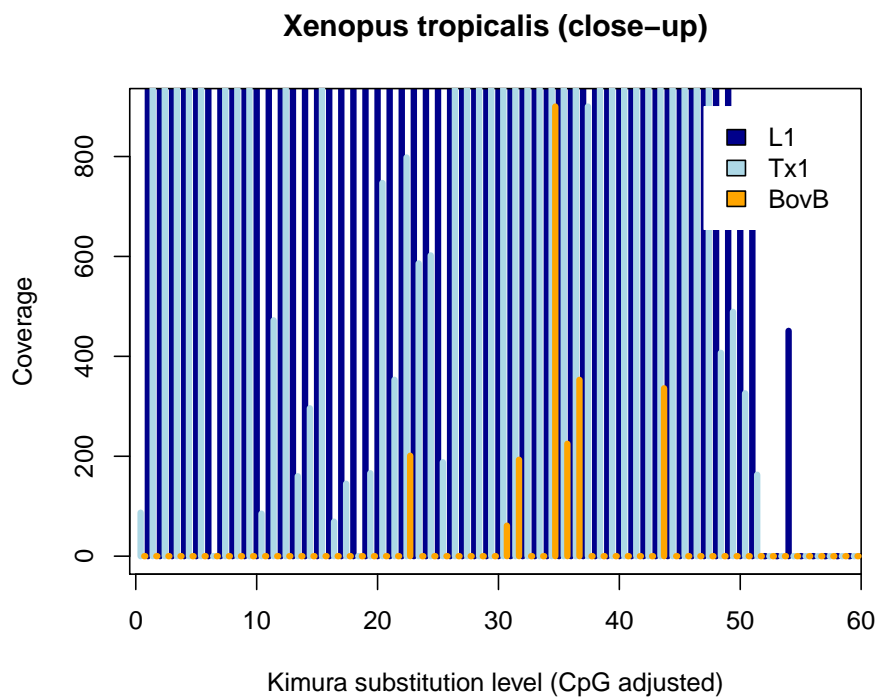

Figure S46

# Neopterygii

## Cynoglossus semilaevis

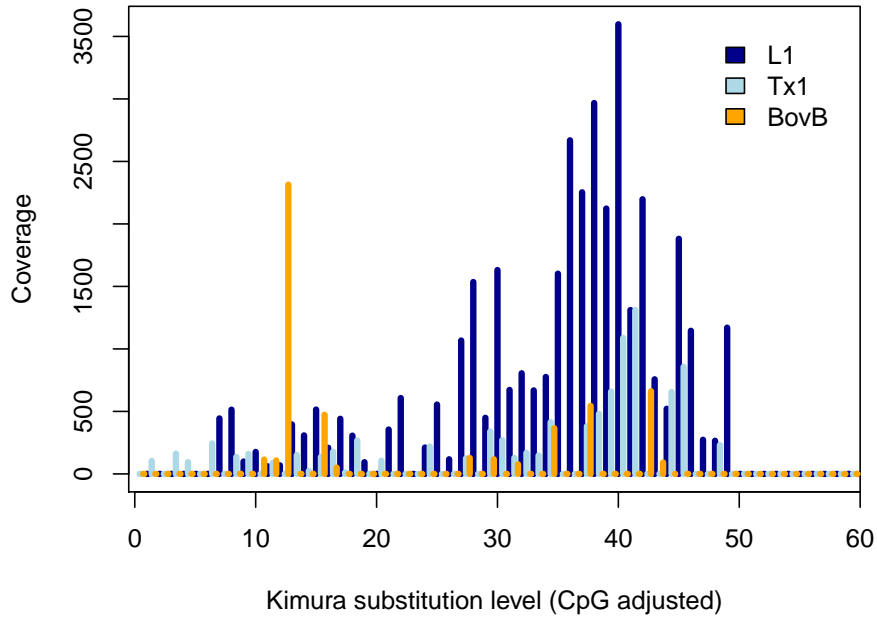

Figure S47

## Lepisosteus oculatus

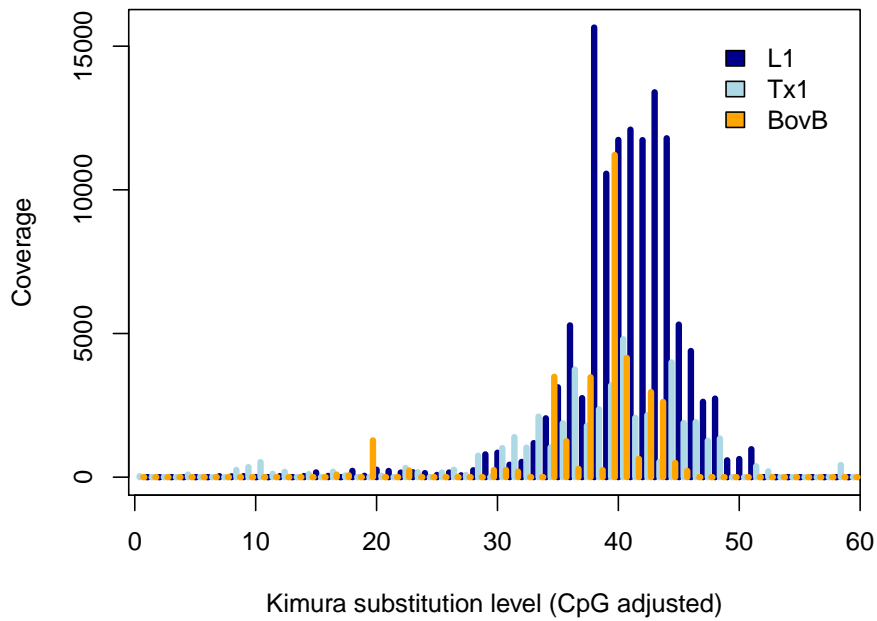

Figure S48

### Danio rerio

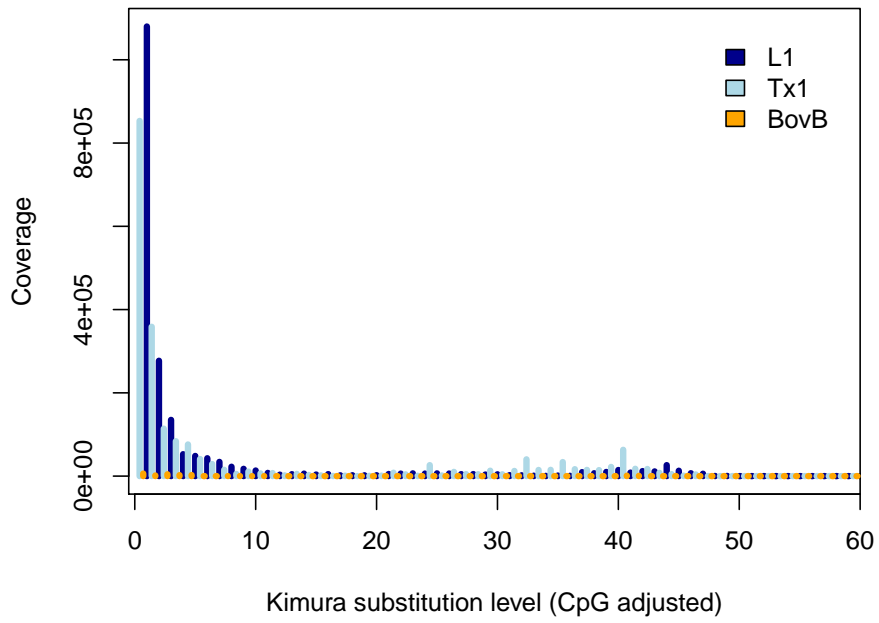

Figure S49

### Danio rerio (close-up)

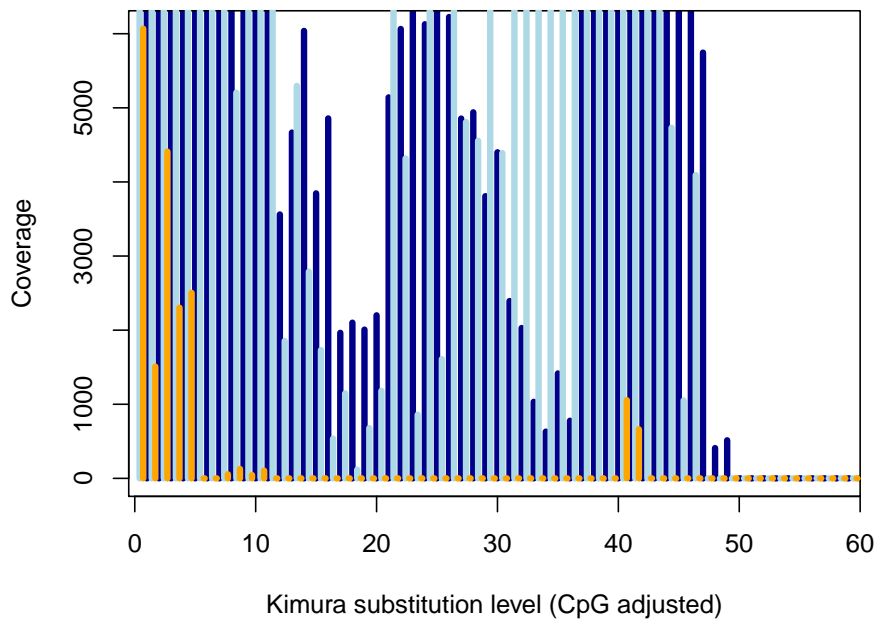

Figure S50

# Other

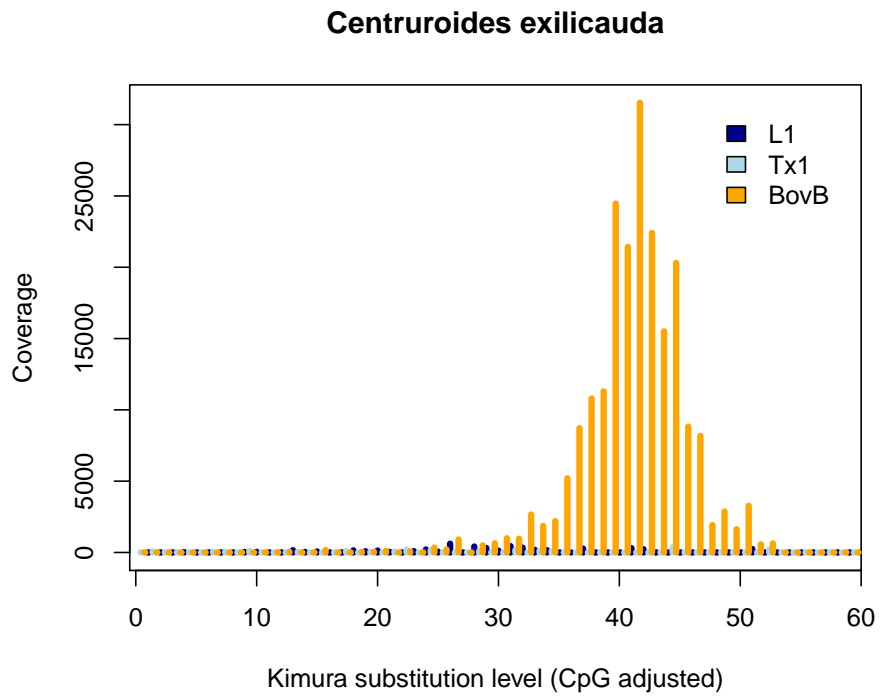

Figure S51

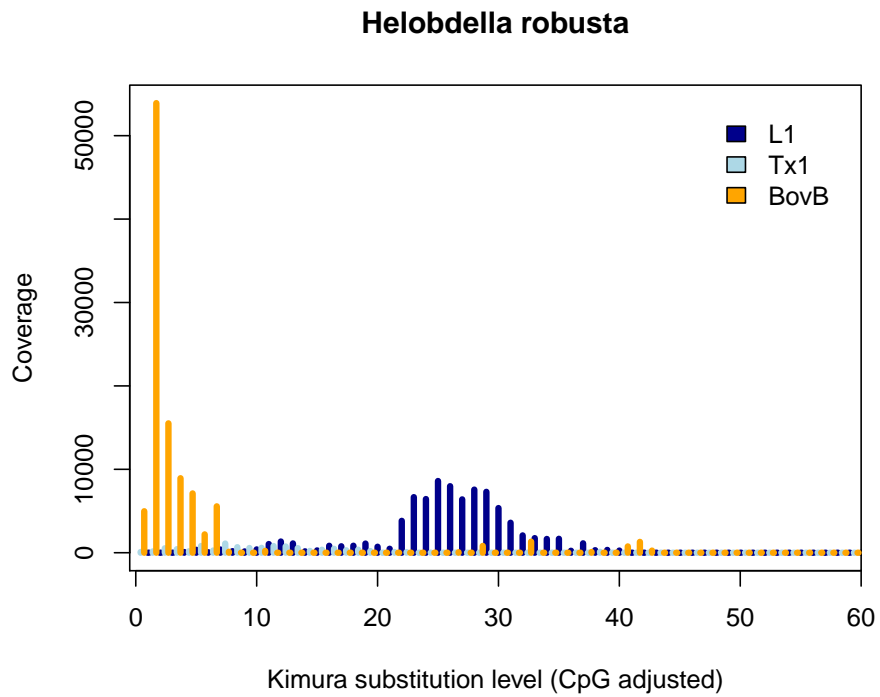

Figure S52

**Strongylocentrotus purpuratus**

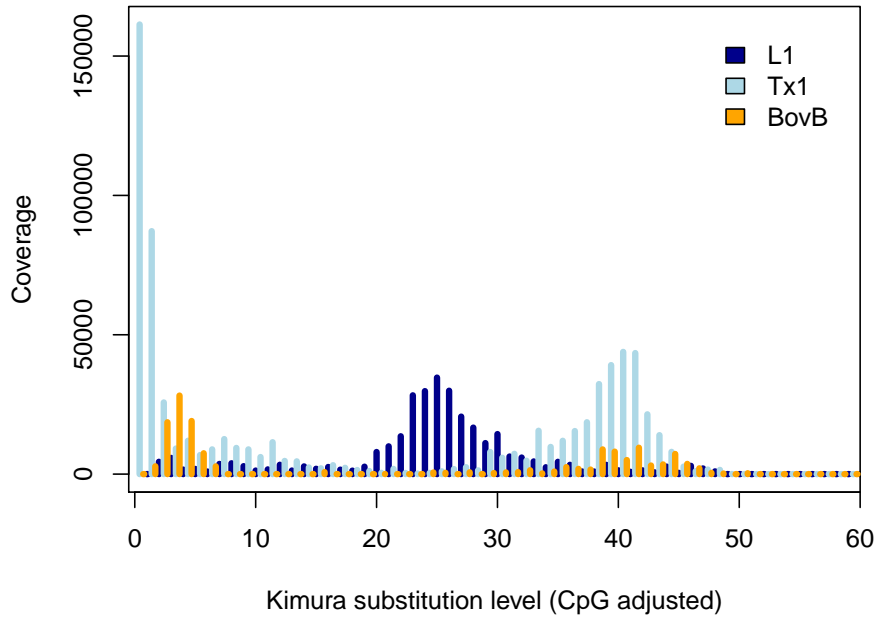

Figure S53

**Ciona savignyi**

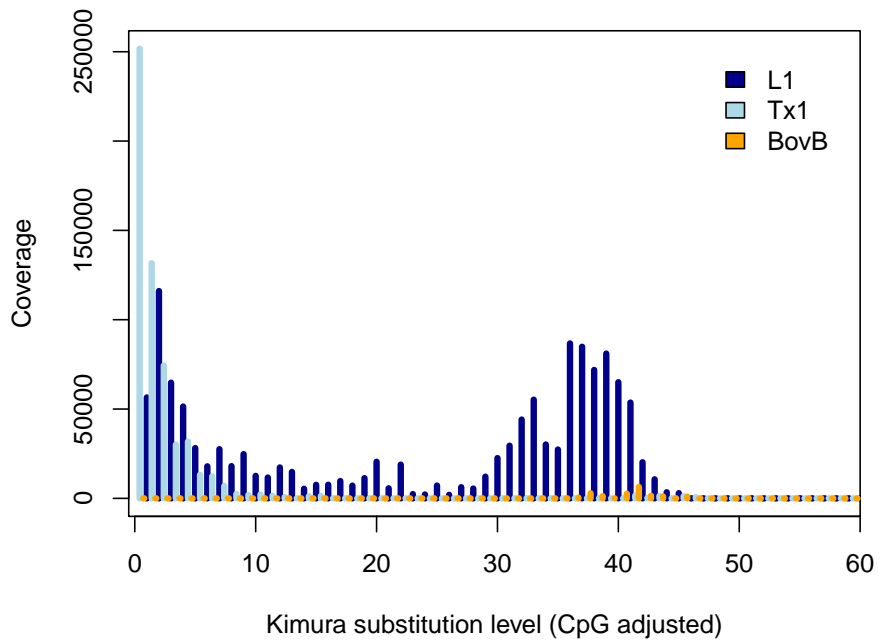

Figure S54

# Figure S55: Chimeric L1-BovB

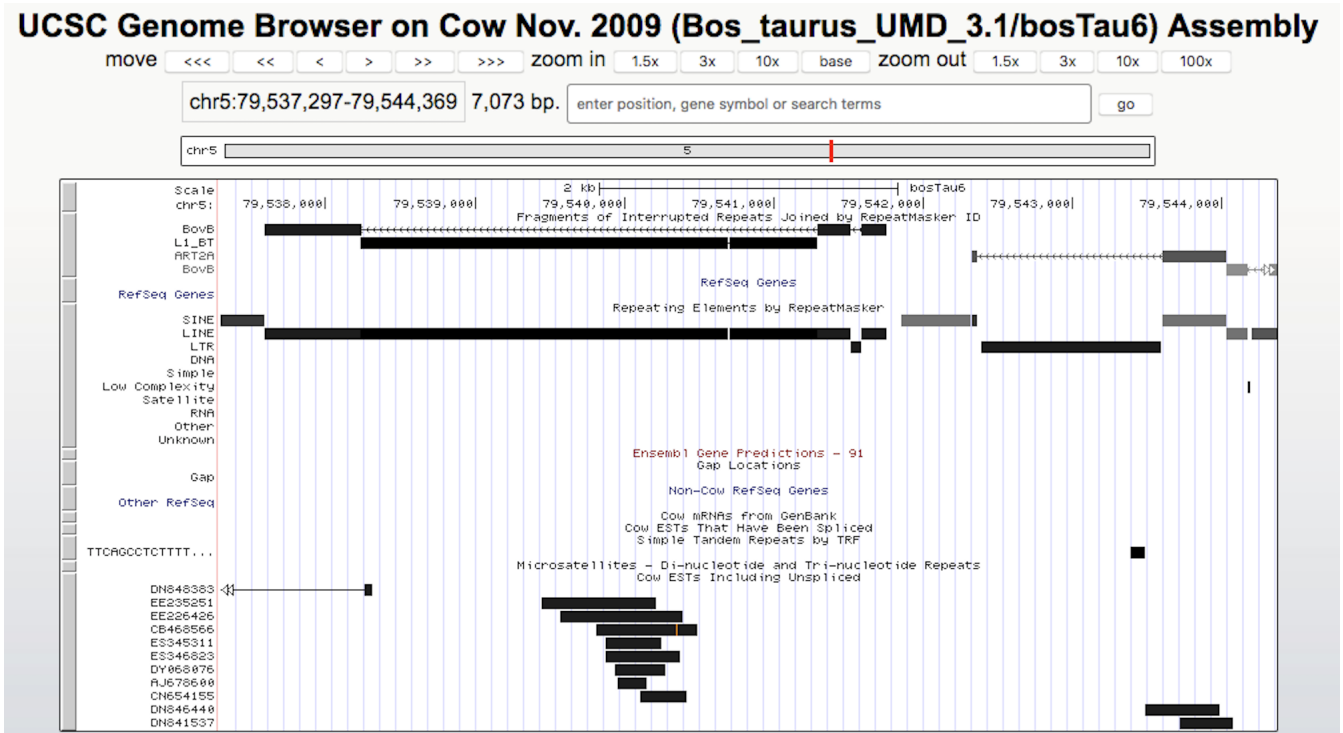

Figure S55: Chimeric L1-BovB in cattle genomes. Several cow ESTs overlap the L1 reverse transcriptase domain, but these may be artifacts/mismapped. No strong evidence to suggest transcription.
